# Supplementary material
Source: Royal Society of Chemistry journal article supplement (doi:10.1039/d5lc01008j)
Supplement: d5lc01008j1.xlsx [file d5lc01008j1.xlsx]

## Sheet: Supplementary file 2
List of proteins identified from TMTpro-based scProteomic analysis of nanoSPINS chip
QC-qualified for proteomics					C10_A1_1	SVEC_A1_1	SVEC_A1_2			SVEC_A1_3	SVEC_A1_4	C10_A1_3	C10_A1_4	C10_A2_1	SVEC_A2_1				SVEC_A2_3	SVEC_A2_4	C10_A2_3	C10_A2_4	C10_B1_1	SVEC_B1_1	SVEC_B1_2			SVEC_B1_3	SVEC_B1_4	C10_B1_3	C10_B1_4	C10_B2_1	SVEC_B2_1	SVEC_B2_2			SVEC_B2_3	SVEC_B2_4	C10_B2_3	C10_B2_4	C10_C1_1	SVEC_C1_1	SVEC_C1_2			SVEC_C1_3	SVEC_C1_4	C10_C1_3	C10_C1_4
QC-qualified in both modalities					C10_A1_1	SVEC_A1_1	SVEC_A1_2			SVEC_A1_3		C10_A1_3	C10_A1_4	C10_A2_1	SVEC_A2_1				SVEC_A2_3	SVEC_A2_4	C10_A2_3	C10_A2_4		SVEC_B1_1	SVEC_B1_2			SVEC_B1_3	SVEC_B1_4	C10_B1_3		C10_B2_1	SVEC_B2_1	SVEC_B2_2			SVEC_B2_3	SVEC_B2_4	C10_B2_3	C10_B2_4		SVEC_C1_1				SVEC_C1_3	SVEC_C1_4		C10_C1_4
Index	NumberPSM	Gene	MaxPepProb	ReferenceIntensity	C10_A1_1	SVEC_A1_1	SVEC_A1_2	C10_A1_2	Control_A1	SVEC_A1_3	SVEC_A1_4	C10_A1_3	C10_A1_4	C10_A2_1	SVEC_A2_1	SVEC_A2_2	C10_A2_2	Control_A2	SVEC_A2_3	SVEC_A2_4	C10_A2_3	C10_A2_4	C10_B1_1	SVEC_B1_1	SVEC_B1_2	C10_B1_2	Control_B1	SVEC_B1_3	SVEC_B1_4	C10_B1_3	C10_B1_4	C10_B2_1	SVEC_B2_1	SVEC_B2_2	C10_B2_2	Control_B2	SVEC_B2_3	SVEC_B2_4	C10_B2_3	C10_B2_4	C10_C1_1	SVEC_C1_1	SVEC_C1_2	C10_C1_2	Control_C1	SVEC_C1_3	SVEC_C1_4	C10_C1_3	C10_C1_4
Q8BGQ7	152	Aars1	1	23.489	23.8646	24.0442	24.3456	NA	NA	23.5054	24.1866	23.2738	23.4203	24.5647	24.3922	24.5727	23.8555	23.5441	23.3992	23.8005	23.8989	22.7868	NA	23.9654	23.0427	23.6628	NA	23.9246	24.4109	23.8111	23.6541	23.2021	23.8725	23.7551	23.9254	23.562	23.6703	23.3148	23.6303	23.4934	23.4675	23.9921	23.6611	NA	24.0922	23.6569	24.103	24.0004	23.5606
P61222	45	Abce1	1	21.1144	21.0212	21.1398	21.403	NA	NA	21.463	21.2954	21.2205	21.3744	20.935	21.5145	NA	NA	NA	21.775	NA	21.6923	21.2543	NA	21.5222	21.8754	21.8837	NA	21.2933	21.6842	21.8377	21.4769	20.5354	21.9481	21.1958	NA	NA	22.0031	20.4421	20.6183	21.1724	21.3859	NA	NA	NA	NA	21.4626	21.3559	21.3356	21.1727
Q6P542	37	Abcf1	1	20.6836	20.8456	21.108	21.5568	NA	NA	NA	21.1472	21.1363	21.4728	21.2524	21.0324	21.4114	NA	NA	20.5687	NA	20.8056	21.561	NA	20.7995	22.0901	NA	NA	20.8744	20.8451	21.09	20.7092	21.1472	21.4669	21.9418	21.2737	21.5306	21.203	21.9126	21.8894	21.7426	NA	NA	21.3541	NA	NA	21.7438	NA	20.5251	21.4878
Q4KML4	50	Abracl	1	22.3958	20.9193	22.786	21.2715	NA	NA	22.8416	21.4592	21.5143	22.059	21.476	21.9392	NA	22.6423	NA	23.197	22.7915	23.1545	22.3981	NA	21.3225	NA	24.6387	NA	22.9926	22.0074	20.2421	20.8964	22.5373	22.0133	21.8527	NA	23.3738	22.2274	21.6362	21.7333	21.8588	21.3028	21.2547	21.5815	NA	NA	21.3394	22.2425	21.9002	21.8489
P51174	101	Acadl	1	23.1025	21.8858	21.5931	22.3612	NA	NA	22.8336	22.9097	22.1042	21.2813	22.774	21.9493	NA	NA	NA	NA	22.4888	NA	22.6513	NA	NA	23.3598	NA	NA	23.3765	26.5734	23.5042	NA	22.6046	22.6014	NA	NA	NA	23.4354	23.1279	22.5706	22.2117	22.1646	21.9458	21.5802	NA	NA	22.4091	22.7269	21.2105	21.9092
P50544	79	Acadvl	1	22.4127	21.9776	21.8268	21.8929	NA	NA	22.3436	22.6155	21.5931	21.995	22.7043	22.2343	22.8709	22.2597	NA	22.1262	21.7891	22.0082	22.2841	22.4221	22.7573	23.0253	23.1167	23.6012	21.6187	23.0579	22.8027	22.1253	22.6174	22.0172	22.6376	NA	NA	22.2751	22.1497	22.5384	22.2521	22.6563	23.0036	22.389	NA	NA	22.3721	22.6648	21.9546	22.1921
Q8QZT1	109	Acat1	1	23.0887	22.2295	22.3643	22.7854	NA	NA	23.1875	22.7439	23.0703	22.5975	22.0483	22.1848	22.4963	NA	22.5104	22.2134	22.0304	22.4114	22.2699	23.2666	23.5687	22.5868	22.8871	23.5835	22.6784	22.6998	22.5766	23.0764	21.646	22.0052	22.6078	NA	NA	23.1499	22.5308	22.2488	22.4648	22.5713	22.2522	22.5967	24.169	23.3781	22.9217	22.8204	22.8595	22.283
Q8CAY6	29	Acat2	1	21.4882	22.6704	21.6034	22.6934	NA	NA	22.2736	22.2238	21.8291	21.866	20.9345	21.06	22.5875	21.8218	21.9228	21.0386	21.3921	NA	21.6235	21.841	21.0272	21.6162	21.9129	21.8819	22.4057	21.0213	20.1397	21.0939	21.4048	20.8876	21.4968	NA	21.8887	21.68	21.4141	20.3819	20.0125	21.2578	21.6499	21.7611	NA	NA	20.762	21.3929	21.1927	20.6899
Q91V92	93	Acly	1	22.6055	23.0818	23.3761	23.311	NA	NA	23.2614	23.0059	22.4365	21.994	23.1246	23.1015	NA	25.059	NA	22.6529	22.8943	23.1958	22.5897	22.799	22.8658	22.5063	24.3393	NA	22.964	23.0117	22.8166	22.3355	21.9626	22.4896	22.7547	NA	NA	22.8858	22.5649	21.9811	22.134	22.3884	22.6229	22.9153	NA	23.203	22.8915	23.5065	22.9035	22.902
Q99KI0	424	Aco2	1	24.8429	24.6178	24.4759	24.3765	25.4896	24.4863	25.0965	24.2329	23.9853	24.5529	23.9576	24.429	25.0594	25.1696	25.0807	24.6002	24.7405	24.1797	24.1708	24.8886	24.7684	24.8054	24.9681	25.212	24.6724	24.118	23.9808	24.0857	24.3817	24.4693	24.4812	24.9714	25.4114	24.2131	24.5306	24.1648	24.4593	24.5161	24.4861	24.6466	24.9916	24.7983	24.606	24.7062	24.5112	24.3953
Q91V12	81	Acot7	1	22.951	22.9175	23.2316	23.195	23.7479	NA	23.3377	24.6192	22.2616	22.1756	21.8439	24.1066	23.6172	23.6725	NA	22.5283	23.2284	22.4451	21.3788	22.7185	23.0016	24.1119	23.2887	NA	23.4454	23.5654	21.4466	21.9895	21.7582	23.1303	23.4236	23.4941	NA	23.1259	23.6464	21.8413	21.302	22.0447	22.8925	23.3762	22.5536	NA	21.9065	22.79	22.0594	22.9293
P62737	203	Acta2	1	27.6584	26.0147	25.621	25.6539	26.8272	NA	26.566	27.5633	26.6238	27.3271	26.964	26.2776	26.7942	28.068	NA	24.8592	25.8172	26.7266	27.2139	26.8227	25.907	25.801	28.0428	NA	26.4827	26.0251	28.0269	25.8051	26.8533	26.9503	27.0914	28.401	NA	27.4728	26.406	27.3562	27.5835	26.8349	24.5876	27.3428	26.9809	26.6605	26.105	25.4876	27.0179	27.039
P60710	1258	Actb	1	30.2404	28.8459	29.1988	29.0656	29.5822	NA	29.1578	29.0553	29.4542	29.0022	29.4398	29.0706	28.8742	29.1403	30.3441	28.9765	28.7867	29.3524	29.3932	29.9672	29.2684	29.1249	29.9872	29.8451	28.9837	29.1324	29.8366	29.3075	29.7329	28.7932	28.6949	29.6018	28.5417	29.0596	28.9769	28.9911	29.0789	28.9572	28.872	28.9868	28.7788	28.9328	29.012	28.8319	29.5229	29.0617
P63260	73	Actg1	1	25.7582	24.7143	23.9874	23.4819	NA	NA	24.2684	23.451	24.2559	23.7875	24.0543	23.8882	NA	24.5554	NA	23.7877	23.0225	23.8344	23.9199	24.7523	23.0275	23.4331	23.9721	NA	23.5196	23.6348	24.1567	23.8161	24.8163	24.173	22.4432	NA	NA	24.1511	24.2333	24.3862	24.3601	24.8543	24.1064	24.412	24.5828	NA	24.9375	23.5866	24.6084	24.1059
Q7TPR4	298	Actn1	1	24.0351	23.0755	23.2361	23.2543	23.8147	23.7695	23.6024	23.7431	23.0375	23.1499	23.2853	22.5464	24.2894	24.5642	24.2184	23.636	22.8521	23.3361	23.2027	23.9246	23.8657	23.2771	23.5802	23.9839	23.549	23.2693	23.9873	23.2397	23.2546	22.4747	23.3969	NA	24.0123	23.2322	23.2205	22.8128	23.3317	23.6527	22.6201	23.1206	NA	23.8271	22.6939	23.2496	23.6774	23.232
P57780	751	Actn4	1	25.4505	24.4344	24.1486	24.1577	25.3363	25.5033	24.6964	24.5259	24.614	24.385	24.3717	23.9311	25.3398	24.1063	25.0274	24.081	24.2558	24.2636	24.422	25.0418	24.5475	24.5114	24.2897	25.4119	24.5094	24.4245	24.3772	24.1448	24.409	24.2812	24.3605	25.161	24.6923	24.8495	24.4147	24.2032	24.4917	24.1443	24.0938	24.1889	25.6452	25.2619	24.3956	24.4899	24.8067	24.8457
P61164	66	Actr1a	1	22.3511	21.3775	21.7574	21.4618	NA	NA	NA	NA	21.7109	NA	21.7974	21.4708	22.1562	22.3484	NA	21.1062	22.5882	21.2876	21.3374	NA	23.051	22.9373	22.918	22.6075	22.3912	21.8107	22.142	21.3327	22.3402	21.6983	22.0155	NA	NA	22.4595	21.9493	21.5847	22.7002	20.7851	21.3586	22.6991	NA	NA	22.9051	22.7033	21.9453	22.874
P61161	102	Actr2	1	22.7919	21.8714	22.3702	22.7909	NA	NA	22.3726	21.7656	22.3405	22.8634	22.2106	23.0486	NA	NA	NA	23.0151	21.3659	22.618	22.8078	22.9653	22.8074	22.1689	23.0473	23.1072	22.0674	22.0048	22.0807	22.6293	22.6954	22.8513	23.5383	NA	NA	22.5563	22.9574	22.5048	22.5632	23.0005	23.1431	22.3814	22.7216	NA	22.9067	22.5187	22.5833	22.57
Q99JY9	155	Actr3	1	23.9628	23.4952	23.552	23.6833	23.4037	NA	23.7543	23.2881	23.7668	23.6905	23.8407	23.8224	23.7955	23.7267	23.9086	24.0938	23.6223	23.8625	24.3042	23.0677	23.8879	23.2597	23.8938	23.6448	23.6615	23.7632	23.6567	23.4992	24.086	23.6908	23.8023	23.9702	23.6646	23.7476	23.9547	23.7234	23.4578	23.6542	23.6742	23.6324	24.1527	23.9684	23.6738	23.9205	23.871	23.8076
P55264	56	Adk	1	21.6164	21.4828	20.9954	21.9303	NA	NA	21.4485	21.6188	20.9081	20.8561	21.5957	20.9717	NA	NA	NA	22.2259	20.9558	21.4855	21.9957	21.1075	21.3738	20.6967	NA	NA	21.0275	21.014	20.858	20.9145	20.5229	21.229	21.3959	NA	NA	21.0232	21.3366	20.7161	20.3854	19.8519	20.5141	20.3914	NA	NA	20.4942	21.0576	20.1563	19.7901
P54822	49	Adsl	1	21.6903	20.2262	20.9787	21.2316	NA	NA	22.343	21.2035	21.6903	21.3858	21.9502	22.286	NA	23.0765	NA	21.8305	22.9763	22.1578	22.6091	20.8918	21.4999	21.0227	NA	NA	19.986	21.2678	21.6294	21.7783	20.7813	20.536	21.12	NA	NA	20.9386	20.8104	20.988	20.3741	20.9508	20.144	20.8526	NA	NA	20.8152	20.9114	21.2915	20.8618
P46664	48	Adss2	1	21.6147	22.7155	21.3067	NA	NA	NA	22.4636	NA	22.0104	21.5913	21.2628	20.1706	21.9211	21.3437	NA	21.3518	NA	21.1513	20.6987	22.3155	21.7224	21.8179	21.881	NA	22.4926	21.5106	22.0434	22.0569	NA	21.4151	21.0632	NA	NA	NA	21.1636	20.9489	21.5988	21.339	22.1002	NA	NA	22.3257	21.7014	21.4793	21.5259	21.9485
P50247	119	Ahcy	1	23.3522	23.1885	22.5309	23.4009	NA	NA	23.4746	23.0554	23.0942	23.0195	23.3968	21.959	NA	NA	NA	23.0873	22.9676	23.2904	22.3207	23.5831	22.7054	22.6501	23.8945	24.4479	23.2149	22.7876	22.6122	22.7608	22.6318	22.5782	22.3484	22.976	23.6561	22.8107	22.9888	22.1603	22.616	22.5984	23.219	23.2265	23.3149	23.2206	22.932	22.9566	23.0742	22.2145
Q80SW1	35	Ahcyl1	1	21.7207	22.7639	22.3524	22.6253	NA	NA	23.7049	22.0732	22.6174	21.9584	22.7181	22.8626	NA	23.0261	NA	22.3556	22.3623	23.002	21.3575	22.3547	22.5088	22.4014	21.9553	22.3242	22.583	22.7242	21.9218	21.7817	22.2582	21.3917	22.6057	NA	NA	21.9506	21.9632	22.1665	22.3941	22.6913	21.9161	22.5933	NA	22.6543	22.2739	22.3299	22.6064	22.6283
Q9Z0X1	62	Aifm1	1	21.4453	21.5035	20.9071	21.9305	NA	NA	21.9383	21.9406	20.7317	21.5029	21.4395	20.9717	NA	21.3599	NA	21.2594	21.6301	21.3223	20.9788	22.1423	20.7727	21.5739	NA	NA	21.6138	21.9406	21.6311	NA	21.5012	21.2061	21.4182	NA	NA	20.4781	21.6546	22.199	20.7603	21.0234	22.0073	21.5826	NA	NA	21.6408	22.1538	21.5433	21.785
P31230	53	Aimp1	1	22.4885	23.6627	23.4307	22.8653	NA	NA	22.7427	22.7766	23.7035	23.1259	21.317	21.9329	NA	NA	NA	22.6968	22.3963	22.2422	22.7707	NA	22.4883	22.2691	22.6201	NA	22.2415	22.6137	22.9187	22.4528	22.4076	22.5023	22.0166	NA	NA	22.4533	22.7116	23.0107	22.821	22.8047	21.8737	22.6139	22.9008	NA	22.2933	22.2585	22.5939	22.4966
Q9R0Y5	40	Ak1	1	21.014	22.7228	22.989	NA	NA	NA	NA	21.8918	22.9772	23.4127	22.4887	23.0856	23.3212	22.0532	23.126	22.9456	23.2748	22.7284	23.1031	NA	NA	21.457	21.3157	21.9498	21.7553	22.0247	21.9971	21.1052	23.0677	NA	21.5826	NA	NA	21.0194	NA	22.7028	22.9171	22.2335	22.7703	21.3832	NA	NA	21.1479	22.8418	22.4684	22.9527
Q9WTP6	84	Ak2	1	23.3278	22.0517	22.8425	21.7554	NA	24.2333	22.7888	22.7373	22.8391	22.9232	22.3884	23.032	NA	NA	23.9397	23.0353	23.1132	22.6311	22.8521	23.6594	23.5526	23.7832	22.7412	NA	23.3582	23.8514	23.3217	22.2122	22.9564	21.8224	22.5636	24.9604	NA	23.5296	23.3636	23.1664	22.9442	22.7317	22.637	22.4812	NA	NA	22.2407	22.7755	22.7931	23.0933
Q9WTP7	48	Ak3	1	21.7379	NA	21.7369	21.0987	NA	NA	NA	NA	21.9461	21.9127	21.5918	21.314	NA	21.8353	NA	20.5593	21.0711	21.3396	19.9001	NA	21.0564	NA	NA	NA	21.5946	21.458	21.4291	21.6318	21.6507	22.3413	22.4347	21.8663	NA	22.1201	21.6562	22.009	21.929	21.3843	21.6908	21.3684	NA	NA	NA	20.84	20.7744	21.2758
Q9JII6	110	Akr1a1	1	22.7708	22.2701	22.1547	22.2132	NA	NA	22.8821	22.4107	22.4813	22.2035	21.7287	22.3127	NA	22.0975	NA	NA	22.7016	21.6951	21.662	21.2282	21.4997	21.0255	21.2774	21.7802	21.4154	21.3889	21.6538	21.3374	22.079	21.8967	21.5891	NA	22.2171	22.5383	22.0575	21.8801	21.3398	22.1457	22.1381	22.0725	NA	NA	22.5038	22.4582	22.2301	22.4933
P45376	82	Akr1b1	1	22.8292	22.3614	22.4929	21.5165	NA	NA	22.4274	22.3755	21.6642	21.6241	22.9083	23.8645	NA	NA	NA	23.3505	23.3196	23.4303	23.6503	NA	22.8488	22.7506	22.9033	NA	22.7293	21.9752	22.6147	21.9596	22.2083	22.5019	NA	NA	NA	23.1479	21.6802	22.0164	21.2179	22.0324	NA	22.5727	NA	NA	23.1657	22.7209	22.5996	22.2713
P45377	36	Akr1b8	1	20.9913	20.1693	21.2212	20.2067	NA	NA	21.1516	20.8921	21.2057	21.5034	20.5931	20.9224	NA	NA	NA	19.9942	NA	NA	20.5031	20.7561	20.6117	20.0354	20.8644	21.5092	21.2835	20.9478	20.1083	20.5361	NA	NA	NA	NA	NA	NA	NA	NA	NA	19.6009	19.6622	20.6548	NA	22.3195	20.0709	20.0397	20.7151	20.3623
P10518	71	Alad	1	22.6215	21.8399	22.046	22.4617	NA	NA	NA	NA	21.9868	22.3259	20.6812	22.4974	NA	NA	NA	21.9991	23.2259	20.5688	NA	NA	21.6465	22.3508	NA	NA	22.5312	22.1625	21.7171	21.3668	NA	21.56	21.7227	NA	NA	22.3451	NA	22.0272	22.7507	22.0788	NA	21.2706	NA	NA	NA	21.6276	21.2635	NA
Q9Z110	276	Aldh18a1	1	23.7755	24.112	23.4939	23.8403	NA	NA	24.2251	23.8028	23.6357	23.7405	24.2916	23.4746	24.4424	23.9197	22.8019	23.9078	23.4676	23.4457	23.0103	24.2184	24.0674	23.3395	24.1472	23.741	23.3972	23.5681	23.6271	23.5227	23.8626	23.7559	23.2504	24.4643	23.8891	23.359	23.0586	23.8021	23.5092	23.8023	23.1895	23.2838	24.1921	24.4211	24.0838	23.8032	23.3567	23.5382
P24549	100	Aldh1a1	1	23.0553	23.1549	21.8767	22.1693	22.8619	NA	23.0255	22.4636	23.087	22.5684	22.4685	23.85	NA	22.5512	NA	21.4964	NA	22.096	23.7671	22.462	22.5407	22.9721	21.942	23.4712	23.2828	22.8062	22.7134	22.7976	21.8155	22.2466	22.0927	22.5278	23.2261	22.4757	22.4902	22.3169	22.1233	23.2682	22.0761	23.2315	23.0426	NA	22.5326	22.5339	23.6249	22.7842
P47738	351	Aldh2	1	24.8071	23.3363	23.5511	23.03	NA	NA	24	23.2318	23.8984	23.4912	23.69	23.3766	25.1802	23.9291	NA	23.8818	23.7763	23.8711	23.7461	24.3076	23.5465	23.6532	24.1114	24.7021	23.8377	23.4151	23.7016	23.3517	23.8507	23.0154	22.6145	24.5832	24.3202	23.4441	23.158	23.8771	23.8338	23.6629	23.5468	23.2838	24.3623	NA	24.0124	23.7187	24.1263	24.1661
P05064	465	Aldoa	1	25.8258	24.601	24.3187	24.4986	NA	NA	24.5802	24.48	24.291	23.685	24.2242	23.82	NA	24.3649	NA	25.2533	24.1368	23.9154	24.4007	24.1715	25.0325	24.312	23.8176	26.0252	24.9955	24.7194	24.6517	24.557	24.0553	23.8514	23.8086	NA	24.2576	24.3291	24.632	24.5188	24.3502	24.5588	24.6479	24.6851	24.9885	24.2035	25.19	24.8104	24.7719	23.9566
O08583	76	Alyref	1	24.2315	24.4828	24.5366	24.107	NA	NA	24.1134	24.6313	24.9568	24.3054	24.3952	23.9748	24.3385	23.7664	NA	24.0023	24.8803	24.3338	24.1155	NA	24.7591	24.1799	24.5327	24.2497	24.2098	24.3826	24.2079	23.7449	24.1881	23.6851	23.9252	24.0954	NA	23.626	24.0714	23.5938	23.5028	23.4809	24.2682	24.4198	23.8759	NA	23.6493	24.7177	24.2974	24.1606
O35381	36	Anp32a	1	23.2829	22.8096	23.088	22.9764	NA	NA	22.6804	23.1411	23.6659	23.2986	22.1919	22.3517	22.8659	NA	NA	22.2144	22.5442	22.7304	23.4642	22.575	22.4515	22.6591	22.9419	NA	22.3762	22.711	22.2712	22.7171	21.9423	22.8746	22.8392	NA	23.1214	22.2717	22.4223	22.1662	22.3013	22.3822	22.4271	22.5748	NA	NA	22.9972	23.2822	23.2291	22.4705
Q9EST5	127	Anp32b	1	24.0365	23.4338	23.753	23.9872	NA	NA	NA	23.5244	24.621	24.6256	23.7841	23.6904	23.5895	24.0798	NA	23.8293	23.2097	23.3604	24.4202	23.9267	23.3254	23.1371	23.0139	22.7204	22.9966	23.4548	22.7636	23.4395	24.2931	23.2158	24.0684	23.7011	NA	24.0396	23.4792	24.8486	24.1487	25.2095	23.4298	23.7764	22.4591	22.6083	24.1926	23.7081	23.846	23.2989
P10107	484	Anxa1	1	26.9132	26.9821	26.743	27.0085	26.6317	26.2099	26.0155	26.465	27.1549	26.6312	27.105	26.4544	26.4294	26.8907	27.2919	26.3575	26.2727	26.9359	26.9334	25.0254	26.0495	27.2052	26.9292	25.7251	26.7598	25.9945	26.5521	26.8689	26.0235	26.9115	26.9429	25.8039	26.0403	26.7098	26.0934	26.4474	26.7544	27.239	25.9984	25.391	25.5837	25.3766	25.6298	25.9076	26.6844	26.242
P07356	575	Anxa2	1	26.8637	26.4096	26.8662	26.3677	26.8249	26.0681	25.8116	26.2945	26.5905	26.9913	26.8573	25.8577	25.8843	26.1972	25.647	25.992	26.37	26.5793	27.1936	25.5484	26.7087	26.7896	26.1933	25.9062	26.4202	26.7099	26.632	26.8764	27.2765	26.3837	26.863	25.8259	25.7195	26.7365	26.6474	26.9355	27.1542	27.2379	26.8637	26.9704	25.7519	25.6812	26.7571	27.1617	27.9102	27.6253
O35639	386	Anxa3	1	25.4442	23.1837	23.1864	22.7204	24.1628	NA	23.5551	23.087	24.034	22.9898	23.5761	23.8146	24.5241	23.45	25.3444	23.1557	23.5646	23.3991	23.3455	24.0519	23.0627	23.8367	24.5038	25.3795	24.0075	23.463	23.7862	23.7295	23.2367	23.3311	23.0526	25.9877	25.1846	23.0545	23.0256	23.5876	23.4007	23.6637	23.4537	23.3699	24.1651	24.9321	23.0899	23.5815	23.9706	23.9943
P97429	157	Anxa4	1	23.9413	23.249	23.2606	23.5871	NA	NA	23.675	23.2431	23.8321	23.3265	23.0623	22.5895	NA	NA	NA	22.3988	22.5592	22.7997	22.523	23.7742	23.8349	22.7741	23.4216	NA	23.5901	23.5293	23.2895	22.4595	23.1977	23.0736	23.0518	NA	NA	23.6503	22.3262	22.731	22.9669	23.236	23.0005	23.2753	NA	23.162	23.9425	23.3372	23.1071	23.5143
P48036	410	Anxa5	1	25.9615	24.0204	24.1575	23.9688	24.8087	NA	24.4934	24.041	24.8382	23.6313	24.5802	24.3808	25.5027	24.4599	25.5857	23.875	24.1323	23.8367	24.111	24.2513	23.6164	23.264	24.2944	25.6911	24.341	23.8324	23.9012	23.7722	24.5283	24.1041	24.0912	25.992	26.1526	23.5373	24.0989	24.2868	24.3547	23.7352	23.4976	23.7843	24.9224	25.0967	23.8584	24.5137	24.6703	24.7743
P14824	419	Anxa6	1	24.8667	23.3867	23.0671	23.5853	25.4691	NA	23.4797	23.2774	24.069	23.8251	23.9234	23.3607	23.9221	23.3447	24.5969	23.4229	23.3933	23.8001	23.6965	24.5741	23.7112	23.7527	23.0024	25.4689	23.9261	23.4765	23.6436	23.2482	23.6212	22.7451	23.1224	23.6375	NA	23.4201	23.1924	23.8662	23.861	22.5149	22.93	22.9232	22.8811	24.8508	23.2935	23.3822	23.7906	24.0616
Q07076	76	Anxa7	1	22.0599	22.5825	22.2582	22.4135	NA	NA	23.1277	22.3604	21.8532	21.7399	21.6892	22.1939	NA	22.269	NA	22.6062	21.7904	22.6568	22.2178	21.3787	22.4442	22.5815	22.622	22.659	22.6146	22.506	22.1168	22.7293	22.5969	21.766	22.362	NA	22.7895	22.7578	23.0476	21.8247	21.7469	21.901	22.3098	21.9684	NA	NA	22.0889	22.7751	21.7422	21.3061
P17427	113	Ap2a2	1	22.3774	22.5561	22.5311	23.2432	NA	NA	22.7153	23.5017	22.9753	22.912	22.7384	22.5372	NA	22.5865	23.2555	22.5196	21.8394	22.6077	22.4736	22.7313	22.805	22.4999	22.932	23.1292	22.931	22.3304	22.0726	22.605	22.8963	22.953	22.6261	NA	22.578	22.076	22.6816	22.7527	22.8409	22.1844	22.4987	22.0336	NA	NA	21.8915	22.5133	22.5444	22.6661
Q9DBG3	196	Ap2b1	1	22.777	22.0768	22.4676	22.0357	NA	NA	22.8231	22.7961	22.6246	22.4872	22.6023	22.5807	22.4566	22.5274	22.9362	22.719	22.7542	22.2517	22.5697	22.542	23.0106	23.0199	22.9319	23.2728	23.3832	22.5008	22.7551	22.9365	22.4361	22.965	22.6601	NA	23.5437	23.3824	22.6246	22.633	22.5076	22.6801	23.1758	22.7599	NA	23.1679	22.8135	22.1746	22.6855	22.9941
P84091	113	Ap2m1	1	22.8507	22.8518	23.0127	22.0223	NA	NA	22.9223	22.8691	22.8447	22.6165	22.6639	22.8216	22.3647	22.986	23.0104	22.699	22.8279	23.0691	22.6975	22.3654	22.7404	22.4235	22.4217	22.6274	22.5097	22.6432	22.7403	22.7603	22.3537	22.4588	22.6011	NA	NA	22.814	22.8429	22.5426	23.0252	23.0591	22.6161	22.8138	NA	NA	22.4874	22.5644	22.7484	22.5698
P62743	22	Ap2s1	1	21.797	21.7752	21.6152	21.9568	NA	NA	21.8998	21.6019	21.9418	21.5067	21.9643	21.8403	22.003	23.3584	NA	23.3189	21.1828	22.0837	22.328	22.0399	22.1685	22.3408	21.9138	NA	22.0989	22.0682	21.978	21.7415	22.5782	21.4446	22.7098	NA	NA	22.8424	22.6268	21.8884	22.5586	20.9395	22.4286	22.2933	NA	NA	22.12	21.9196	22.3224	21.6178
P28352	42	Apex1	1	21.3758	23.2388	21.4754	22.0474	NA	NA	NA	22.6118	21.6985	22.2601	21.7488	22.402	NA	22.3307	NA	22.4863	21.9844	21.8737	20.7887	22.4454	22.0047	22.4181	22.9279	22.167	22.1295	22.5375	21.9632	22.1828	22.4374	22.964	22.6909	NA	NA	22.8892	22.5772	22.1622	21.5812	21.1825	22.0936	21.1509	NA	NA	NA	22.0361	21.0848	21.3161
P08030	50	Aprt	1	22.0976	20.8018	21.2082	21.0079	NA	NA	21.7335	21.7261	21.0867	20.2533	20.0308	21.5178	NA	22.5435	NA	20.4459	21.5904	20.1268	20.8115	NA	20.169	20.9026	NA	NA	NA	21.0941	20.6257	20.7487	NA	NA	NA	NA	NA	NA	NA	NA	21.4066	21.2263	22.4932	21.7812	NA	22.8747	21.4993	21.7104	21.2196	21.1615
Q5XJY5	106	Arcn1	1	22.4236	23.4289	22.7515	22.7144	NA	23.7308	23.1866	23.3045	22.896	23.2469	22.6664	22.886	NA	22.4722	23.8179	22.6006	22.2857	23.3686	23.1846	23.3	22.8792	22.8648	22.4942	22.5922	22.5066	22.4727	23.037	22.8007	22.8619	22.3406	23.1156	NA	NA	23.6576	23.2617	22.1751	22.226	22.3901	22.2153	22.7914	NA	NA	22.2865	21.9498	22.8229	22.8563
P84078	65	Arf1	1	23.6521	22.7048	22.6032	22.7452	NA	NA	23.5776	23.4091	23.5577	23.7277	23.4671	24.2206	NA	NA	NA	24.2687	NA	23.8379	23.2745	NA	NA	NA	NA	NA	NA	NA	22.3885	23.4746	23.4552	23.2176	22.943	22.7866	NA	23.0747	23.6837	23.738	23.4103	23.1013	23.878	23.148	22.7792	NA	23.4526	23.3269	22.8401	23.7495
P61750	122	Arf4	1	24.2334	23.419	24.0123	24.1563	NA	NA	24.1564	23.8133	23.6581	24.2212	24.0033	24.2334	23.566	23.6206	NA	23.7956	23.7325	24.0231	24.0895	NA	24.076	24.1259	23.2547	NA	23.9591	23.3763	24.1541	23.4515	23.9525	23.8946	24.0376	24.4914	NA	23.6592	23.7504	24.4221	24.4838	23.588	24.333	24.3081	NA	NA	23.5877	24.4965	24.3673	23.9485
P84084	35	Arf5	1	23.3973	23.1644	23.3985	23.431	NA	NA	23.0199	NA	23.1683	23.4686	23.6957	23.3945	23.135	22.0589	NA	21.883	23.3361	23.9154	23.3519	NA	22.8192	22.4164	23.0517	22.9554	23.0411	23.4247	23.5703	23.3442	23.4579	23.5752	23.7498	NA	NA	23.1727	22.8374	23.8687	23.4162	22.7224	23.8381	23.0109	NA	NA	23.2645	23.4275	23.256	23.6369
Q5FWK3	62	Arhgap1	1	22.4407	22.0759	21.6538	21.2306	22.9552	NA	22.1612	21.6315	22.8689	22.6754	23.32	23.1196	24.5475	23.2187	NA	23.8551	22.337	23.4493	23.9982	NA	23.2551	22.383	23.0595	NA	22.3292	22.0785	22.7803	23.0515	22.4705	22.4992	22.3342	22.6975	NA	21.7506	22.8268	22.6512	23.5055	21.9204	22.1879	22.0364	NA	22.403	22.5098	22.1545	22.5699	22.6729
Q99PT1	191	Arhgdia	1	25.2812	24.7818	23.7363	23.2982	NA	NA	24.2704	25.0616	24.3886	23.1252	24.0459	23.6332	26.3585	24.8779	25.9458	24.0764	25.9309	24.2416	24.2995	24.4197	24.0762	23.5269	23.4982	NA	23.3576	24.1751	24.2483	24.0395	22.9927	23.5623	23.4327	NA	NA	24.5015	23.9694	23.7256	23.8127	23.7234	24.2708	23.3252	24.5403	24.8294	23.7627	24.4242	24.304	24.065
Q61599	82	Arhgdib	1	23.7112	20.5622	22.0959	22.0518	NA	NA	NA	21.2087	21.7203	21.3914	22.2196	22.2273	NA	21.4986	NA	21.4823	20.7997	22.6613	20.8174	NA	22.411	NA	22.6525	NA	21.4883	21.2595	21.6551	21.1488	21.411	21.056	22.8954	NA	NA	20.9607	21.4432	22.5342	21.3319	21.5367	21.2702	22.0878	NA	NA	21.2268	21.5855	22.2201	21.8213
Q8R5J9	39	Arl6ip5	1	22.5141	22.3891	22.5168	22.4724	23.0065	NA	22.3036	21.6696	22.5989	23.2241	23.2804	23.187	NA	22.7916	NA	22.4024	21.6453	23.1101	23.672	23.0216	22.9136	22.2559	23.2396	NA	22.7624	22.8348	23.4294	22.9009	23.0202	23.3937	21.9527	NA	NA	22.7071	22.3427	24.0767	23.1592	23.2611	22.5919	22.9386	23.4556	NA	22.1815	21.9427	23.4537	23.4113
Q9WV32	54	Arpc1b	1	22.4626	21.5617	21.1311	21.4784	23.2928	NA	22.2398	21.1246	21.8005	22.1038	21.8966	22.3194	NA	NA	NA	22.0599	NA	22.2019	NA	22.314	NA	22.2751	NA	NA	22.6299	22.0859	21.8572	22.1	22.0731	22.0379	21.2349	22.3783	NA	21.2387	21.8788	22.4983	22.6064	NA	NA	NA	NA	NA	NA	NA	NA	NA
Q9CVB6	89	Arpc2	1	22.9821	22.3888	22.063	22.1618	NA	NA	22.5795	22.3844	22.533	21.9888	22.7914	22.2239	22.5711	22.275	NA	23.0468	22.4954	22.6072	22.8078	23.0498	22.4143	22.72	22.3891	23.8472	22.2609	22.4776	22.5422	22.5248	22.933	22.6634	22.6599	23.1279	NA	22.7642	22.8471	22.791	22.7101	22.2179	21.9933	22.8431	22.547	NA	22.2656	22.1074	22.3529	22.6233
Q9JM76	30	Arpc3	1	21.6434	21.5668	21.4769	21.4732	21.9295	NA	21.3035	21.4102	21.295	21.4014	22.163	22.1196	22.0864	21.7333	NA	21.8919	22.0459	21.9493	22.1364	21.5961	20.9346	21.9936	21.7845	21.367	21.1208	21.8315	21.7589	22.3482	21.8428	21.892	21.7691	NA	NA	21.911	22.0475	22.071	21.9896	22.094	21.7185	22.3959	NA	21.8684	21.9577	22.0566	21.8401	22.3782
P59999	77	Arpc4	1	22.7533	22.1702	23.0267	22.8592	NA	NA	22.1236	22.3896	22.5592	23.0284	22.1181	22.6146	22.5785	22.31	NA	22.2605	22.7021	22.262	23.0935	NA	22.1637	21.7297	22.0126	NA	22.8	21.9509	22.3571	22.1541	23.0432	22.9057	22.2559	22.4537	NA	22.8566	22.43	23.0366	22.6105	21.9007	22.3307	22.4937	22.4119	NA	22.6337	22.7832	21.9668	22.6924
Q9CPW4	76	Arpc5	1	22.5501	21.294	21.6659	21.3885	NA	NA	NA	21.4314	22.2937	21.792	22.9866	23.1372	22.4358	22.4673	NA	22.5023	22.8969	22.4527	23.6843	NA	22.3998	NA	NA	NA	22.6185	21.6216	22.0043	21.6617	22.8881	22.4709	21.2753	NA	NA	22.444	22.146	22.2841	22.1426	21.7431	22.0072	21.6973	NA	NA	NA	22.0192	21.7358	21.4473
P56212	48	Arpp19	1	22.3896	NA	23.1856	NA	NA	NA	NA	NA	22.901	NA	22.2235	23.2304	NA	NA	NA	NA	NA	22.5663	22.6524	22.4503	22.7809	22.8118	22.1335	22.3896	23.0521	22.6258	22.6072	22.2769	22.495	22.9956	22.8208	NA	NA	23.0895	21.7692	22.6452	22.4601	NA	NA	NA	NA	NA	NA	NA	22.3811	22.9546
Q61024	93	Asns	1	22.8961	23.1254	22.1374	22.4986	22.4309	NA	22.2404	22.7515	21.6991	21.8823	22.866	22.3035	22.6073	23.0499	23.9321	22.3219	23.2206	22.9436	21.979	21.8799	22.5839	22.9016	22.8612	22.7084	22.9225	22.9303	22.8514	22.169	23.1019	23.1268	22.2574	22.3702	22.7405	21.3009	22.9702	22.8092	22.8337	23.3627	22.321	23.6995	23.4369	23.4299	22.5633	23.6329	23.34	22.7386
P16460	33	Ass1	1	21.3363	NA	NA	NA	NA	NA	NA	NA	NA	NA	NA	20.5132	NA	NA	NA	20.9938	20.6697	20.5884	21.4077	21.8616	21.7866	21.1019	NA	NA	21.5468	21.6406	20.878	21.1698	19.717	20.5999	21.9882	NA	NA	21.5775	22.1843	20.8038	NA	NA	NA	NA	NA	NA	NA	22.368	21.9403	21.4732
Q9CWJ9	191	Atic	1	23.3418	23.5277	23.8783	23.7435	NA	NA	23.7693	23.6181	23.2033	23.1255	22.596	22.6365	23.3528	22.7095	24.378	22.9517	23.1608	22.6098	22.698	23.6707	23.9059	23.4931	23.5192	NA	23.7494	22.9601	22.8117	23.166	22.8672	22.5748	23.7853	24.709	23.9914	24.352	23.2538	23.1134	22.8894	22.9922	22.5218	22.668	23.0869	22.9883	23.5183	22.755	22.4782	22.0544
Q91YH5	74	Atl3	1	22.2108	21.8178	21.9453	22.6169	23.2721	NA	22.0609	21.0595	22.2091	21.9191	22.1535	23.3893	23.9388	22.7768	23.3135	24.4693	24.5381	23.5954	23.5013	22.519	22.757	22.6044	23.4615	23.6621	23.0553	22.5651	22.3811	22.8117	21.8733	22.4736	22.3892	23.298	23.6266	22.6803	23.9338	22.1929	22.0614	21.1385	21.1187	20.3344	NA	22.2948	21.5263	21.8329	22.3222	21.6911
Q8VDN2	309	Atp1a1	1	23.5639	23.752	22.9149	23.9501	23.6979	NA	24.1636	23.8187	23.6056	23.4328	23.0778	23.7344	23.8698	23.5513	NA	23.3361	23.5336	22.6451	23.0945	23.8141	24.085	23.63	23.6638	23.5514	23.0557	23.9156	23.1188	23.5617	23.2401	23.5029	23.401	23.791	24.0877	23.5301	23.4989	23.4681	22.9979	23.4855	23.5066	23.4261	24.2875	23.7945	23.9099	24.0422	23.0829	23.6594
O55143	102	Atp2a2	1	22.872	23.5246	23.2046	22.8772	25.025	NA	23.4102	23.0089	23.0272	22.2784	22.6384	23.1433	NA	23.0755	NA	23.1829	22.805	23.1214	22.9738	23.2173	21.913	22.7852	23.1869	22.8133	22.804	21.9585	22.3437	22.4506	22.2816	22.9798	23.321	23.3758	NA	23.205	22.3674	23.5047	23.3952	22.5613	22.5127	22.1324	23.1244	NA	22.2205	22.4754	22.3869	22.4118
Q03265	627	Atp5f1a	1	26.2653	25.3658	25.3468	25.5742	25.5583	NA	26.2379	25.328	25.398	25.4201	25.5944	25.7494	25.2596	25.2963	25.0703	25.9486	25.9268	25.3487	25.7011	26.2347	25.9536	25.6109	25.6018	25.1876	25.6219	25.4952	25.453	25.4686	25.8864	25.7807	25.7286	26.1204	25.631	25.7088	25.4975	25.7085	25.8561	25.2466	25.6879	25.664	26.3635	26.0761	25.7308	25.9028	25.5274	25.5559
P56480	653	Atp5f1b	1	26.7493	26.1647	26.0546	25.9824	26.4592	26.334	26.6667	26.0341	26.1812	26.054	25.5486	25.6148	26.9482	25.5758	25.7993	25.3321	25.822	25.7704	25.3755	26.4282	25.7527	25.8863	25.8351	26.0489	25.8077	25.7844	25.7559	25.559	25.626	25.9718	25.7703	26.1155	26.482	25.4351	25.9901	25.695	25.6104	25.6968	25.843	25.9196	26.119	25.6113	25.8849	25.7275	25.8387	25.6812
Q91VR2	142	Atp5f1c	1	24.0674	23.9414	23.5111	23.0596	23.9723	23.51	24.836	24.2378	23.3909	23.3935	23.7371	23.2513	23.5538	23.9883	23.6692	23.5754	24.1746	23.2745	23.7204	24.1482	24.0291	23.2512	23.6383	23.7548	24.117	23.5933	23.2146	23.5895	24.8602	23.5089	23.9719	24.5464	24.1051	23.6377	24.9835	23.7097	24.2414	23.5008	23.8382	23.5486	24.1458	24.3843	23.3933	23.8387	23.1792	23.1252
Q9D3D9	73	Atp5f1d	1	23.8772	22.8165	22.5377	22.2817	NA	NA	23.4966	22.3514	22.8016	22.2378	22.4093	22.4734	23.0262	NA	NA	22.9755	22.2212	22.0849	22.2479	23.5064	22.3866	22.642	22.3206	23.6873	23.2058	22.4513	22.2608	22.9614	22.5956	22.8398	23.5579	24.0243	NA	23.5394	23.2049	22.9893	22.8614	23.6676	22.8481	23.474	23.3102	NA	22.6531	23.2603	23.4601	22.7699
P56382	35	Atp5f1e	1	21.7057	NA	NA	NA	NA	NA	NA	NA	NA	NA	22.221	22.3512	21.8848	21.8417	NA	21.5773	22.293	22.4582	22.4068	23.5985	23.1264	22.3183	20.5164	21.923	21.4396	23.5679	22.2115	22.1553	22.4419	22.2042	22.3526	21.8242	NA	21.6913	22.4305	22.6205	22.2617	21.3978	21.4048	21.4939	21.9958	21.6794	21.3388	22.7316	22.1262	22.172
P56135	36	Atp5mf	1	22.8308	22.4659	23.0362	22.6092	NA	NA	22.6283	21.6668	22.8285	22.4849	22.4448	22.4714	NA	NA	NA	21.5678	22.5335	22.3087	22.1458	22.576	21.632	22.4514	NA	NA	21.8705	22.1595	21.8586	22.7831	22.8271	22.1396	20.7236	22.3678	NA	21.2274	21.6532	22.7332	22.0651	22.9162	22.8208	22.7367	22.9887	NA	23.0826	22.9584	23.1921	23.0095
Q9CQQ7	109	Atp5pb	1	23.0118	22.0658	22.733	22.3896	22.4433	NA	23.3082	22.1799	22.6358	23.2716	22.2269	23.569	22.0337	21.9459	NA	22.4775	22.8505	21.9707	22.7224	23.4642	23.0587	21.5211	21.8633	NA	21.8565	22.559	22.8557	22.6785	23.0144	23.2585	22.9809	23.2113	NA	21.941	22.9338	23.025	23.1103	22.1928	22.2975	22.7528	22.6966	NA	22.5751	22.546	22.8711	23.0151
Q9DCX2	95	Atp5pd	1	23.1609	23.5708	23.913	23.3317	NA	NA	23.7664	23.9247	23.669	24.2869	22.9211	22.8348	23.1817	22.9637	23.1656	23.3513	23.326	23.0421	23.2533	23.1044	23.3775	23.1441	23.1953	23.8426	23.0162	23.1643	23.3797	23.4896	22.825	23.1795	23.1082	23.6023	23.4397	22.4352	22.94	22.933	23.3811	22.8086	23.5036	23.3464	23.5553	22.4438	23.288	23.0596	23.3622	23.3385
P97450	64	Atp5pf	1	23.25	23.361	23.3097	22.8781	NA	NA	23.4244	22.7185	22.6334	23.0663	22.6167	22.1281	NA	23.5625	NA	22.8746	23.4893	23.5273	23.0423	22.8929	23.0834	23.2997	NA	NA	22.6862	22.9999	22.9108	22.8574	22.3302	22.6314	23.6957	NA	NA	23.0098	22.4427	22.8196	22.8238	22.7025	23.3952	23.2986	23.4813	NA	23.0979	23.4084	22.9368	23.703
Q9DB20	80	Atp5po	1	23.5508	23.9541	24.029	24.1064	NA	NA	24.4108	23.6803	24.2253	24.5329	23.6013	23.8698	NA	23.4934	22.5646	23.8624	23.9383	23.2517	23.9219	24.3718	23.9471	23.0871	23.0641	NA	23.3373	22.9874	23.5585	23.9771	24.1398	23.3089	24.5525	23.6227	22.5665	23.6183	23.6355	24.1225	24.0832	23.7037	23.653	23.6913	23.4856	NA	23.8165	23.8808	23.6757	23.7324
P63082	27	Atp6v0c	1	22.0974	21.3572	21.415	21.7799	NA	NA	22.3481	21.1619	21.4461	20.7648	21.6245	22.3187	NA	22.1455	NA	22.6198	22.6174	20.7867	21.6825	22.3274	21.5934	21.4028	21.417	20.9206	22.6278	22.2063	20.9997	21.4806	20.7435	20.8184	22.1025	21.6246	NA	21.6005	22.0719	21.0345	21.0818	20.7833	21.0866	21.5932	21.6137	20.8433	21.0065	23.2034	21.0476	21.014
P51863	43	Atp6v0d1	1	21.3412	22.4489	22.6978	23.2219	NA	NA	22.1024	22.5816	22.6377	22.6448	21.5196	22.2421	NA	22.3286	NA	22.4817	22.8331	21.3088	22.2282	20.9186	21.3162	20.4333	21.0791	21.3592	NA	21.0158	20.394	NA	NA	20.9175	21.6309	NA	NA	21.722	20.9117	20.9473	20.7582	21.4602	21.1492	21.686	NA	22.1323	22.1443	22.1304	21.0426	21.2855
P50516	112	Atp6v1a	1	22.8088	22.6756	22.0767	23.5332	NA	NA	23.438	23.055	22.8362	22.935	21.9437	22.8885	NA	23.5642	NA	23.3715	23.4142	22.4222	22.4309	22.8822	22.7285	23.2353	23.5176	23.4053	22.9688	23.2569	23.0772	23.2345	22.8875	22.2927	22.7752	22.8359	23.1672	23.2811	22.7672	22.7044	22.3949	22.5918	22.6684	22.4407	NA	23.2918	22.4822	22.7627	22.6294	22.6116
P62814	74	Atp6v1b2	1	22.316	NA	22.2237	NA	NA	NA	22.8328	22.3252	NA	22.9012	22.1012	21.6512	24.9795	NA	NA	21.8052	23.424	22.4531	21.6551	23.4129	22.1877	22.2384	NA	NA	23.4638	22.8088	22.1515	22.7734	22.3648	21.749	23.3027	NA	NA	23.4949	22.1611	21.6612	21.9557	22.3295	22.3549	22.3947	NA	23.3743	22.4619	23.045	22.8877	21.2609
P50518	41	Atp6v1e1	1	21.5377	21.0471	21.4684	21.3097	NA	NA	21.3569	20.9045	21.2029	21.6384	21.2998	22.2385	NA	21.756	NA	22.1776	22.983	22.1262	NA	NA	22.1392	21.3106	21.9467	21.518	21.9172	21.7861	21.485	20.7022	21.5204	21.7836	21.0847	NA	NA	21.8886	22.1333	21.5033	21.0467	21.5241	21.4713	21.4189	NA	NA	21.176	22.5674	21.6085	21.5829
P28658	81	Atxn10	1	22.5249	22.297	23.4339	22.1017	22.8645	NA	22.2249	22.792	23.3784	22.718	23.4686	22.4152	NA	23.232	23.4816	23.5769	23.0865	23.4838	23.3776	NA	22.15	22.6007	23.046	NA	22.3775	22.7245	22.7181	23.2627	24.1618	22.8801	23.5699	NA	23.2099	24.0708	23.1221	23.3912	23.1041	22.58	22.869	22.8311	22.7544	NA	23.5393	22.9035	23.1335	23.2875
P01887	64	B2m	1	23.3347	22.1023	22.4149	22.5121	23.5539	NA	22.8991	21.7568	22.4077	22.8986	NA	23.4592	NA	NA	NA	22.967	23.093	22.3387	NA	NA	NA	NA	23.72	NA	NA	NA	22.4589	22.7131	NA	22.4009	23.1981	NA	NA	23.3692	22.5621	23.1703	22.1747	22.7491	23.2532	23.1411	NA	NA	22.6864	NA	21.9253	23.302
O08734	34	Bak1	1	21.339	22.7948	22.4025	22.2793	23.2282	NA	22.9882	22.0089	22.4143	22.3484	22.6206	23.055	22.3298	22.3894	NA	22.0844	23.5722	23.0905	22.9599	21.9267	21.355	21.8544	22.169	NA	22.7167	22.9326	21.5354	22.5774	21.9774	NA	NA	NA	NA	NA	21.7446	21.1119	22.1472	21.6345	22.4969	22.837	22.3545	NA	23.3492	22.8996	21.62	22.2129
O54962	108	Banf1	1	24.3697	24.419	24.5881	24.4605	NA	NA	24.2576	24.7026	24.3143	24.3468	24.4563	24.473	25.5707	24.4238	24.4847	25.0688	25.0326	25.0699	24.5426	24.2907	24.4821	25.1581	24.4485	24.6267	25.073	24.6424	24.7557	23.8807	23.7193	24.4975	23.9115	23.6879	24.1064	24.2704	23.5132	23.9662	23.4899	22.9394	23.4792	23.8133	23.2523	23.2701	23.8945	23.8093	24.3723	24.2272
Q91XV3	98	Basp1	1	23.175	22.7112	24.1411	23.1334	NA	NA	23.6578	23.4278	22.1912	22.8581	26.2126	25.855	NA	25.4774	NA	25.2095	24.9053	26.4557	26.4883	22.946	23.3735	23.5964	23.1809	23.1549	23.198	23.7378	24.1829	23.2561	23.013	24.8114	23.7562	23.2241	NA	22.976	23.2819	23.723	23.7819	24.3231	23.9438	24.4085	23.1629	NA	22.379	24.8836	24.3693	24.9606
Q61335	53	Bcap31	1	22.6051	22.9364	22.7369	22.2261	22.5071	NA	21.9516	22.024	21.8774	22.7297	22.5826	22.2424	23.1854	22.8161	NA	22.2991	23.2238	22.6051	22.9254	23.2709	22.6835	22.9244	23.0127	22.8502	22.3172	22.1371	23.2696	22.2135	22.656	22.0877	21.4652	22.6959	21.6407	22.2594	21.9311	23.4865	23.2125	22.4226	23.0452	21.7933	22.7478	22.7098	22.3475	22.3828	22.4905	22.5128
Q8K019	33	Bclaf1	1	21.9628	22.3397	22.7644	22.5477	22.4884	NA	22.9005	22.7713	22.8048	22.257	22.1209	22.5134	21.5444	22.034	NA	22.106	22.7628	22.7061	22.5598	22.2489	22.3667	21.7838	21.589	NA	22.4178	22.5255	22.3582	22.3577	21.1941	21.6139	22.1625	21.8908	21.4707	21.5986	22.6974	22.8201	21.623	22.5281	22.2043	22.0261	22.3106	21.7452	22.4307	22.7501	22.2817	22.2275
Q9CY64	72	Blvra	1	22.1116	NA	22.3884	23.4313	NA	NA	22.5649	NA	21.8097	22.9746	22.5572	22.6906	NA	22.7526	NA	22.0284	22.4097	23.34	22.8441	NA	22.9917	22.6145	NA	NA	22.8629	23.0236	22.6667	NA	22.6724	22.5027	23.0063	NA	NA	23.1447	22.4137	22.8547	22.804	22.5318	22.6347	22.3729	NA	NA	21.6919	22.7641	22.4172	22.1805
Q923D2	51	Blvrb	1	21.9513	21.2713	21.1251	22.679	23.434	NA	22.8039	22.2867	22.2814	21.6265	21.3162	22.3383	23.2774	NA	22.6853	22.0128	23.4733	21.0567	22.934	22.6074	22.5074	21.61	22.1995	22.0266	21.4594	22.9745	21.0859	21.6905	21.4121	22.5868	21.9184	22.4969	NA	21.8592	22.1489	21.9499	21.7546	22.6668	22.1137	22.2896	NA	22.8067	22.1038	22.4835	22.0361	21.9914
P18572	98	Bsg	1	23.0738	21.6212	22.5345	22.1444	NA	NA	22.4774	22.481	22.2566	21.8167	21.6736	23.0495	24.2872	22.7476	NA	22.3764	20.7664	21.7052	22.2765	22.6636	23.2048	22.4498	NA	NA	22.2926	21.9671	22.4754	22.0927	22.0563	22.137	22.2689	22.9592	23.0366	22.1563	22.4883	22.4351	21.7641	21.6329	23.2651	22.0319	22.6919	23.1988	22.0073	22.4543	22.2082	21.8986
Q8R2Q8	42	Bst2	1	23.1128	21.1551	21.9583	22.3843	NA	NA	22.0187	21.0287	20.6479	22.1776	20.391	21.4208	NA	21.0251	NA	21.5646	21.5488	20.1106	19.921	NA	22.7032	22.2717	21.2086	NA	22.5303	22.9313	21.3984	22.0036	20.9219	21.2546	21.9451	NA	NA	21.7173	22.7726	20.5281	20.8062	19.9413	21.9589	22.3948	NA	NA	21.8549	22.3238	20.3675	21.1284
Q9WVA3	23	Bub3	1	19.6612	19.6328	20.403	19.6339	NA	NA	19.8147	19.5633	20.5534	19.8172	19.9755	20.2642	NA	NA	NA	19.9425	NA	19.6655	19.7336	NA	20.0183	19.8527	NA	NA	20.4069	20.4176	20.2763	20.7024	19.9097	20.5948	20.3645	NA	NA	20.0251	20.3851	20.2575	20.222	20.6624	20.8597	20.8942	NA	NA	19.8951	20.8587	20.3408	20.6699
O35658	80	C1qbp	1	23.8424	22.1239	22.6731	22.1134	NA	NA	NA	22.2849	22.0379	21.2142	21.322	21.7493	NA	NA	NA	21.2428	21.4402	21.3854	21.7705	23.5339	25.3777	23.0343	NA	NA	23.0463	21.7796	21.3482	22.1229	21.8662	24.2082	22.2325	NA	NA	22.7513	21.7509	21.8306	21.7611	22.2775	NA	23.2647	NA	NA	22.2777	NA	22.6447	23.2163
Q9CXW3	78	Cacybp	1	23.0067	23.118	23.9749	23.0883	22.7949	NA	21.8797	23.1855	23.9164	22.4801	23.5572	23.5417	23.3161	23.8809	23.4471	23.6976	23.0744	22.9891	23.8545	22.6274	23.6403	22.9474	22.6063	22.9671	23.0298	23.2209	23.3629	23.5926	23.3525	23.8499	22.6681	22.2742	22.5864	22.9235	22.8703	23.8564	23.325	23.74	23.5268	23.7771	22.3592	22.5434	22.6712	22.8413	23.8587	23.7952
P0DP26	171	Calm1	1	26.253	22.7973	23.5031	23.7195	NA	NA	23.9838	23.0103	23.1459	22.706	24.5237	22.786	NA	25.3127	NA	24.4767	25.5597	22.6638	22.8989	25.7643	23.8876	23.7733	25.9392	25.6295	24.4107	23.076	22.9661	23.6273	23.9284	24.7705	26.0535	26.145	25.4588	24.9259	24.3398	24.0248	25.2595	24.3732	24.1068	23.5327	25.5062	25.1632	24.1043	24.6464	23.666	24.0203
P14211	428	Calr	1	26.3465	23.5483	24.1115	23.8366	24.6171	NA	24.7219	23.8214	24.6016	23.6482	24.2584	24.5777	26.1925	24.5988	25.3102	24.1836	23.392	24.5428	23.8778	25.1714	23.633	23.7801	24.043	26.1968	24.0517	23.7349	23.8535	23.436	24.1034	24.1807	23.7158	25.2867	NA	24.5075	24.0544	24.3456	24.0531	24.0518	23.654	23.7528	24.9648	25.2506	23.8517	23.8232	24.6743	25.0668
O35887	277	Calu	1	25.6106	24.7447	24.1831	24.4456	25.1814	NA	24.5323	24.0138	24.1765	24.4616	24.9595	25.0501	25.0897	25.1657	26.7077	24.2293	24.2419	24.7999	24.9886	25.3078	24.8926	24.9057	25.3151	24.7385	25.035	24.4612	24.8008	24.5095	24.8543	24.4633	24.2101	24.8135	NA	23.9834	24.1225	24.4435	24.7652	24.6703	24.9697	24.5199	25.5624	25.8791	23.9966	24.3775	24.616	24.6112
Q6ZQ38	138	Cand1	1	22.5951	23.4145	23.1075	22.9934	NA	24.1818	22.7838	23.5423	23.3106	23.3827	23.3838	23.2234	22.6734	23.1941	23.0617	23.1578	23.3554	22.5787	23.0636	22.4294	23.1677	23.0103	23.159	23.8101	22.9695	23.2376	22.8859	23.1018	22.9266	23.2674	22.8933	NA	23.6728	23.0983	23.5315	22.982	23.5693	22.4279	22.4419	22.6287	23.1643	NA	22.8016	23.4543	22.2354	22.8114
P35564	417	Canx	1	25.687	23.7799	23.6988	24.026	24.1162	26.1746	24.4986	24.2006	24.5078	24.0641	24.2985	23.5171	24.807	24.2543	23.5574	23.8155	23.5839	23.6834	23.9626	25.2157	24.8322	24.8684	24.5324	24.4658	24.3321	24.8166	24.1915	24.2341	23.4568	23.1919	23.5313	25.2745	25.5499	23.1738	24.0853	23.8949	24.0851	24.3253	23.484	23.7831	24.5429	25.3627	23.9721	24.1695	24.0956	23.9506
P40124	276	Cap1	1	24.2395	23.9184	23.3148	23.7897	25.3733	24.8383	24.241	24.0406	23.7358	23.4596	24.1704	24.0875	24.5046	24.2544	NA	24.3944	24.0291	23.6427	24.3799	23.5179	24.4237	24.0105	23.9571	23.9157	23.6635	23.6525	23.5299	23.392	24.2524	24.9093	24.649	NA	23.7271	24.4332	24.9309	24.3531	24.6213	24.022	23.9289	23.9182	24.9868	24.6079	23.6089	23.8543	24.0028	23.7838
O08529	192	Capn2	1	23.3731	23.7489	23.5258	23.0778	NA	25.8527	24.1845	23.306	23.7147	23.6214	23.5443	22.8969	NA	NA	NA	22.4876	22.8262	23.0696	22.9779	23.5609	22.8036	22.4806	NA	23.2872	22.9025	22.8255	22.9906	22.1692	23.1334	23.9656	23.101	NA	NA	23.4924	23.7866	23.2265	23.3206	21.8958	23.1806	22.8922	22.3719	NA	23.3821	22.7578	23.6798	23.3514
O88456	72	Capns1	1	22.5739	21.2503	22.3487	21.9108	23.926	NA	22.3854	22.0157	23.0736	22.6867	23.2084	22.6748	23.2817	22.1572	23.3937	22.3815	24.0391	23.2478	22.866	23.3973	23.0961	22.9514	23.3478	NA	22.9295	22.9996	22.9776	21.838	23.1056	23.4554	22.9823	24.3646	NA	24.4179	22.4092	23.0285	22.4606	23.1723	23.0674	22.8611	22.5914	23.5194	23.7753	22.9841	23.4542	23.2668
Q60865	80	Caprin1	1	22.9695	23.0433	23.3904	23.239	NA	NA	22.9212	22.5021	23.3578	23.3905	23.5513	23.4446	22.9655	22.3421	22.6014	23.525	21.9734	22.9989	23.0622	23.31	23.224	23.1831	22.6795	NA	22.9286	22.8818	23.7991	23.359	23.2468	23.2868	23.2881	22.5987	NA	23.1879	22.7257	23.8525	23.3507	23.2992	22.9954	23.3786	23.307	NA	22.8967	23.4374	23.1557	23.5797
P47753	62	Capza1	1	23.1606	23.8631	23.1527	22.8809	NA	NA	NA	NA	23.1397	23.0207	23.2737	22.6104	NA	NA	NA	24.3303	21.792	23.046	23.3999	NA	22.4868	22.993	NA	NA	NA	22.9874	21.9106	22.2316	23.3582	22.7445	22.3736	NA	NA	22.5234	22.6411	21.8314	21.8889	22.2281	NA	23.4051	NA	NA	NA	23.1123	23.1991	23.0068
P47754	139	Capza2	1	23.7791	22.9721	23.4076	23.4036	NA	NA	23.3912	23.725	23.6312	23.3104	23.8279	23.5564	NA	23.0044	NA	23.4958	23.5885	23.4571	24.1805	22.9983	23.9568	24.5663	23.8677	NA	22.8171	23.2954	23.4747	23.7324	23.2597	23.3181	23.7259	22.4673	NA	23.6081	23.5826	23.5863	23.6377	23.713	23.6303	23.4292	24.2003	NA	23.4073	23.5898	23.0527	23.2764
P47757	133	Capzb	1	23.6167	23.0093	23.3062	23.242	NA	NA	23.5416	22.6266	23.8592	22.8152	23.1152	23.1686	NA	23.5798	NA	22.7613	22.9704	23.741	23.252	22.8536	22.3511	22.888	22.6488	NA	23.3884	22.6298	23.4471	22.7578	23.1854	23.3061	23.5824	22.9561	NA	22.9956	23.8557	22.9693	23.37	22.9228	22.8307	22.7074	24.1739	23.2303	22.8648	23.1957	23.301	22.8034
P49817	60	Cav1	1	23.2969	21.9633	22.2508	21.4389	23.489	NA	23.0545	23.2904	23.2465	22.8418	22.8818	23.3517	23.1889	23.4403	22.5775	22.9319	23.2922	23.178	23.3133	22.4512	21.5079	22.2599	NA	22.6842	22.5933	22.5543	22.2481	22.746	22.4721	21.9886	22.1697	22.8784	22.7803	22.0228	22.611	22.4721	22.2248	23.3831	22.9027	22.7563	22.7563	22.9145	22.4341	23.307	23.1015	22.7566
O54724	137	Cavin1	1	24.532	24.6602	24.1098	24.0971	NA	NA	24.3419	24.2052	25.3949	25.3748	24.8683	24.8207	24.5859	25.816	NA	25.1801	23.9173	25.3357	25.4907	24.5959	24.3595	24.1598	23.7573	24.997	24.279	24.1861	24.9324	25.2118	25.5933	24.032	23.947	25.5058	NA	23.8851	23.5334	24.4789	25.0768	25.0519	23.9266	24.4598	24.3091	24.4538	23.5646	24.0779	24.9744	25.6064
P23198	79	Cbx3	1	22.69	22.4414	22.5996	22.3717	NA	NA	22.0138	22.8598	22.5938	22.4499	22.1721	22.8871	NA	NA	NA	22.836	NA	23.1124	21.6068	26.5084	24.0953	23.2738	22.9155	NA	25.0394	22.4819	22.3831	23.2674	22.7952	22.8197	NA	NA	NA	22.3877	22.3078	22.1617	22.1054	24.538	23.8911	24.7056	NA	NA	24.259	23.8482	23.4587	22.8966
Q61686	60	Cbx5	1	23.1351	23.3584	23.9621	22.7202	NA	NA	23.6985	23.3409	23.8182	23.6115	22.8178	23.649	NA	22.9969	NA	23.4699	23.4514	23.5281	23.0442	23.6834	23.8317	23.0168	23.2546	22.8409	23.1702	23.5898	23.483	23.4301	22.7876	23.408	22.4392	22.7226	22.8677	23.2891	22.9224	23.5649	22.68	24.2789	24.0375	23.652	23.6783	23.3548	23.663	23.8915	23.9582	24.0718
P80314	361	Cct2	1	24.728	24.0297	24.1436	24.2094	24.4967	24.8513	24.4744	24.3374	24.5145	24.5715	24.629	24.611	24.62	24.7241	24.2037	24.6466	24.6533	24.4435	24.8315	23.8814	24.3761	24.8245	24.3208	25.0266	24.826	24.4018	24.2839	24.5459	24.3163	24.876	24.6597	24.0417	24.8628	24.1836	24.4984	24.3315	24.4383	24.2006	24.7081	24.4323	23.7418	24.2462	24.4463	24.2	24.3559	24.1081
P80318	305	Cct3	1	24.2124	23.9485	23.5465	23.84	25.3649	25.111	23.9545	23.4897	24.0136	23.9464	23.9188	23.8248	24.0561	23.6431	23.5766	23.7846	24.4814	23.7214	24.4602	23.755	24.225	24.197	23.8406	24.2405	24.4465	24.2741	23.5402	24.0144	23.8292	24.0567	24.2779	23.998	24.0671	23.8102	24.3267	24.6095	24.7455	23.8442	24.3302	23.9611	23.845	24.235	23.8448	23.8352	24.0484	24.1577
P80315	292	Cct4	1	23.9053	22.99	22.5672	23.1978	NA	24.3837	23.4711	23.3508	23.284	23.3114	23.7229	23.3849	23.681	24.1089	24.4211	23.7966	23.9457	23.5604	23.6085	23.4907	23.5219	23.7866	23.8631	23.8658	23.4554	23.4325	23.3629	23.4686	23.8664	23.8531	23.4948	23.4758	23.7345	23.7637	23.7825	23.9392	23.8799	24.0367	23.9044	23.8835	23.759	23.4052	23.893	23.8192	23.8754	23.6229
P80316	197	Cct5	1	23.859	23.3341	23.2741	23.5048	NA	24.4906	23.6126	23.8884	23.9606	24.1207	22.9067	23.4085	23.4597	22.8408	23.1362	22.8427	23.5642	23.0395	23.5042	23.3678	23.6591	24.0653	23.5293	23.3982	24.0794	24.0591	23.5339	23.2705	23.4176	23.4621	23.4152	23.1841	23.0408	23.3363	24.0832	23.9462	23.7553	23.5456	23.6105	23.2496	NA	23.707	23.3865	23.2259	22.7807	22.9902
P80317	222	Cct6a	1	23.9301	23.9213	23.5525	23.4619	24.2402	NA	23.9367	23.6858	24.3489	23.9459	24.086	23.6339	23.1179	23.4344	23.6256	23.9685	24.2819	23.848	24.358	23.3049	23.7928	24.0994	24.2469	24.5431	24.0546	23.6681	23.8601	24.2375	24.0289	24.0002	24.0522	23.3866	NA	23.906	23.9547	24.1693	24.2389	23.9872	23.7099	23.9939	24.108	23.0448	24.0736	23.8419	24.0372	24.0272
P80313	212	Cct7	1	23.7374	24.0409	23.5553	23.7889	23.5995	NA	23.5323	23.9867	23.6875	23.6134	23.6782	23.8718	23.737	23.2913	NA	23.8439	24.292	23.5673	24.1619	23.1357	23.8588	23.5545	23.3996	23.166	23.6827	23.3735	23.5306	23.8271	23.9896	24.017	24.1577	24.8301	23.8708	24.0447	23.8856	24.2013	23.8288	23.8697	23.8346	23.4447	24.5353	23.9093	23.8101	23.6522	23.4306	23.7547
P42932	315	Cct8	1	24.3329	22.7881	23.4221	23.8649	24.2239	NA	24.2503	23.3978	23.7939	23.8939	24.0192	23.9791	24.0754	23.7238	24.5908	24.1897	24.0964	23.5911	24.2041	24.0215	23.7956	23.9596	23.8388	23.7891	23.988	23.7925	24.0395	23.5203	24.0001	23.5976	23.4647	24.5562	23.6853	23.2064	23.807	23.5844	23.9555	23.5091	23.8118	23.8186	NA	23.9604	23.9016	23.707	24.3138	24.153
P15379	37	Cd44	1	22.0005	21.8239	22.4798	21.4614	22.2387	NA	21.1617	21.7251	21.8897	21.6668	20.6781	21.4225	NA	NA	NA	21.8241	21.8217	21.9092	21.294	NA	21.168	NA	22.6293	NA	21.6455	21.9181	22.0511	20.964	20.9019	19.885	20.9341	NA	NA	21.3139	NA	19.5155	20.4714	NA	NA	NA	NA	NA	NA	NA	NA	NA
Q61735	44	Cd47	1	22.6213	21.974	21.9078	21.7187	NA	NA	22.7016	NA	21.5532	22.2365	22.0967	21.8835	NA	21.7442	NA	21.1644	21.4223	21.7457	21.4948	22.65	21.4874	21.5774	NA	NA	22.4131	22.5964	22.3541	21.9849	21.6557	22.1037	21.4368	NA	NA	21.3399	21.9585	21.6959	22.6864	22.5702	NA	22.8652	NA	NA	23.1234	23.7367	22.4042	21.8901
P41731	45	Cd63	1	23.378	20.3899	20.8076	20.5812	NA	NA	21.7398	20.7195	21.9116	21.4724	21.7697	22.068	NA	21.7535	NA	22.5144	22.8061	21.8928	21.5966	22.9497	20.8295	21.0603	21.8769	22.6253	21.7376	22.4026	22.0367	21.7289	21.4185	NA	20.9384	NA	22.1328	21.5106	21.7113	21.28	20.8575	23.5546	22.7556	21.6593	NA	NA	23.2738	23.5591	22.0751	21.8205
Q61081	77	Cdc37	1	22.7409	23.2004	23.3843	23.225	NA	NA	23.3041	23.5169	23.6442	22.9955	23.2153	23.2553	22.4336	22.8574	NA	22.8469	22.7529	22.9019	23.2513	22.3658	22.5245	22.88	24.1269	23.5035	22.9242	23.2817	22.9308	23.2927	22.927	22.4114	23.1649	23.8989	24.1042	23.0954	22.2711	23.3201	23.4869	23.3859	23.2744	23.1553	23.8248	23.5403	23.9089	23.8133	23.785	22.9864
P60766	96	Cdc42	1	23.7504	23.2093	23.5047	22.7874	NA	NA	22.3002	23.2529	22.8485	22.8939	23.2116	22.9709	23.8524	22.6838	NA	22.8718	23.785	22.9692	NA	22.8266	22.299	22.7685	NA	NA	22.1276	22.7601	23.004	22.74	23.8414	23.1066	23.8835	23.8747	NA	22.9033	23.2808	22.0516	23.3502	23.0324	22.8232	22.3813	23.8688	NA	22.6029	23.3401	22.8803	23.0347
P11440	52	Cdk1	1	21.8956	22.494	22.86	21.8288	NA	NA	21.8056	21.7391	21.8854	22.0973	21.4517	22.2108	NA	22.4004	NA	21.8187	21.3776	22.5169	NA	NA	23.2642	23.1002	NA	NA	21.844	22.298	21.6435	20.8545	21.8968	23.2538	22.2102	NA	NA	21.1045	22.2552	21.4355	20.6523	22.4609	23.0838	21.9047	NA	NA	21.543	20.8236	21.3328	22.2245
Q4VAA2	63	Cdv3	1	21.9111	21.9246	22.5734	22.0476	NA	NA	22.0673	22.2505	22.3215	21.8355	22.6509	23.5569	22.546	21.2706	21.8897	22.2874	22.3084	21.9355	23.0502	22.8017	23.0085	22.2385	22.3919	21.8885	22.4502	22.8415	22.831	22.6118	21.6352	22.8908	22.3776	21.8991	22.2313	22.2137	22.2373	22.6964	21.88	23.2591	23.265	23.2977	NA	22.8589	22.6866	22.8842	23.5662	23.2947
P18760	257	Cfl1	1	27.5007	26.7001	26.5145	26.6313	25.2454	NA	25.6175	26.6763	27.1432	26.8009	27.433	27.6272	26.9442	26.4949	NA	26.1494	26.0102	27.0851	27.3978	26.152	27.2122	27.109	26.8544	26.801	26.9737	26.7193	27.0718	27.3662	27.1312	27.2411	26.9972	26.6549	26.0185	27.0958	27.2432	27.5199	27.3257	27.3937	26.6802	26.9121	25.6947	25.7492	26.6635	26.5629	27.411	27.4622
P45591	58	Cfl2	1	21.7978	NA	NA	NA	NA	NA	NA	NA	NA	NA	20.6043	21.7205	NA	NA	NA	21.3976	21.4103	21.2484	NA	21.4409	NA	21.0116	NA	NA	21.5764	20.831	20.5501	20.8292	22.1556	21.3774	22.4235	NA	NA	22.6237	22.9176	21.7902	21.9563	21.0636	20.8363	20.2688	NA	NA	21.1528	22.2883	22.0252	21.3651
Q9CRB9	41	Chchd3	1	21.2919	20.4294	20.4878	NA	NA	NA	NA	20.9007	21.1006	20.8605	21.7229	21.2644	NA	NA	NA	20.5535	20.2806	22.337	21.8298	22.4971	21.9216	21.7828	22.0327	NA	21.6774	21.1572	22.9737	22.4977	21.5259	20.4375	NA	21.6248	NA	NA	NA	21.9764	21.9257	22.5013	21.8512	22.4396	22.2261	NA	22.025	21.7485	22.7218	22.7367
Q9D8B3	52	Chmp4b	1	22.398	22.1764	21.9784	NA	NA	NA	NA	NA	22.1872	NA	22.3006	21.9823	NA	NA	NA	22.1046	22.4857	21.9173	21.7179	NA	21.9029	22.06	22.2771	NA	20.4655	22.1271	21.3183	21.4314	22.3351	21.9578	21.5452	NA	22.8619	22.1312	21.5172	22.6342	22.6782	21.9699	22.8848	22.1366	22.2444	NA	22.2014	22.4942	21.9995	22.3537
Q8BMK4	497	Ckap4	1	25.3693	25.1401	25.4657	25.3163	25.18	26.2697	25.2174	24.702	24.8185	25.1699	25.2233	25.0902	24.6423	24.5973	25.0112	24.9644	24.8478	25.4667	25.033	25.4612	25.2032	25.2326	24.546	24.6429	24.7012	24.9385	25.4717	24.7338	24.9122	25.1147	24.7612	25.2395	24.4143	24.57	24.7447	24.8209	24.9797	24.746	25.2276	24.8491	25.1548	25.3059	24.9979	24.9246	24.7675	25.316
Q9Z1Q5	215	Clic1	1	24.4044	23.6784	23.7539	23.2577	24.0635	NA	23.4404	23.8152	23.6724	23.7415	23.7698	23.9594	24.0767	23.5709	NA	23.6756	23.6589	23.5746	23.4398	23.6331	23.0423	23.8393	23.1544	23.51	23.1236	23.5103	23.9794	23.6097	24.0982	23.8771	24.2118	23.3986	23.4864	23.8613	24.2315	23.3074	23.8408	23.7513	23.7227	23.7596	23.6726	23.9637	24.3627	23.7977	23.7035	23.6571
Q9QYB1	94	Clic4	1	23.5033	23.2585	23.2304	23.1301	NA	NA	23.152	23.4421	22.937	22.484	23.3978	23.1093	23.7526	23.1984	23.5875	22.2672	22.9436	23.1296	23.2668	23.7089	23.5188	23.4321	22.8069	NA	23.7639	23.8233	23.4585	23.2483	23.2663	23.3595	23.8014	23.2762	23.562	22.9899	23.0852	23.5	23.0803	22.624	22.2604	23.2406	23.3372	23.7572	22.5528	22.4722	23.0814	22.357
O08585	112	Clta	1	23.8157	23.1639	21.9955	22.9138	23.7924	NA	23.0274	22.9635	22.981	22.6269	23.2548	22.6164	23.1354	22.4382	NA	22.9879	23.1757	23.2917	23.3592	23.659	23.7912	23.5375	22.6818	23.3581	23.067	23.292	22.7461	23.7043	23.269	22.5158	22.6228	NA	23.5753	22.8981	22.919	22.3638	23.2201	23.0136	22.9584	23.1089	NA	NA	22.8436	23.5479	22.9755	22.7494
Q6IRU5	55	Cltb	1	21.7597	21.4976	22.0072	22.0728	NA	21.8169	21.9934	21.9666	21.2174	22.6039	21.773	22.1076	NA	21.6966	21.5562	21.5931	21.7167	22.1818	21.524	21.3486	22.1393	21.641	21.6711	NA	22.0089	22.2789	22.0124	21.7323	21.975	22.8482	22.0614	NA	NA	22.2941	21.5923	22.1499	22.1775	21.4162	22.5673	22.4394	NA	NA	22.3529	22.0407	22.1847	22.2965
Q68FD5	1005	Cltc	1	25.1321	24.9593	24.7452	25.1162	25.231	24.6336	25.1023	24.9854	25.0897	24.9563	25.1119	25.189	25.1274	25.3542	24.6087	25.2239	24.9876	25.0655	24.8453	24.8063	24.9588	25.0098	24.6964	24.8439	24.923	25.0088	24.4206	25.0602	24.7231	24.9808	25.2913	25.1004	25.6603	24.8735	25.3246	24.5637	25.1249	24.902	24.8427	24.4024	24.4931	24.3558	24.4485	24.8859	24.3374	24.3224
Q9DBP5	41	Cmpk1	1	21.8102	22.3985	22.7624	22.8284	NA	22.319	21.5579	22.7802	22.9449	22.4428	21.6416	22.668	21.9026	NA	21.93	21.6521	22.0236	22.6196	22.3219	NA	22.6839	23.2886	22.0434	NA	22.562	22.4233	22.4288	22.3314	22.5035	22.4745	22.9407	NA	NA	21.9134	22.3237	22.4254	22.1842	22.3176	22.0697	22.1464	22.5491	NA	21.8673	22.7784	22.4226	22.2013
P53996	42	Cnbp	1	22.3268	21.4208	21.3633	21.358	NA	NA	22.8792	21.1903	21.6239	21.7623	NA	NA	NA	NA	NA	NA	NA	NA	NA	NA	20.9647	20.6521	NA	NA	21.7076	20.9729	20.579	22.0627	22.8583	22.8352	22.674	NA	NA	22.785	22.7039	22.2196	22.7958	22.7613	22.9205	22.2884	NA	NA	22.6036	NA	22.4365	22.7366
Q08093	61	Cnn2	1	22.2865	22.5548	22.2566	22.2606	NA	NA	22.3844	22.286	21.8996	23.5447	23.7872	22.4328	23.0231	22.5763	NA	23.135	22.72	23.4293	22.8432	NA	21.348	21.9876	21.6996	NA	21.8704	22.4397	22.7877	21.9988	23.8373	22.6639	21.0688	NA	NA	22.6146	22.4017	23.5966	23.9943	22.6246	22.0732	22.8409	21.9019	21.6186	22.3305	22.6409	23.392	23.6264
Q9DAW9	129	Cnn3	1	23.7918	23.3743	23.7752	23.6566	NA	NA	23.4833	23.2894	23.8466	23.3283	24.619	22.7149	NA	24.131	NA	23.6783	23.4144	22.9017	23.8473	22.7233	23.0219	23.4475	23.1534	23.0859	23.404	23.7833	24.2572	23.7632	23.9568	22.6315	22.1701	NA	NA	22.8646	24.0453	23.2089	24.2663	24.4798	24.0251	23.9133	23.1599	NA	23.7959	24.2607	24.4456	24.5115
Q9QXT0	83	Cnpy2	1	23.0092	23.3855	22.4344	23.0707	NA	NA	23.4479	23.1447	23.0603	24.3436	24.0495	23.587	23.0017	22.6843	24.232	23.5045	22.8192	23.0409	22.8081	22.8925	21.231	21.9371	NA	NA	22.6134	22.6623	21.6233	22.0252	23.2373	21.8976	22.5472	22.5491	23.6714	23.4521	22.2278	22.3912	22.1556	22.7735	21.3282	22.63	NA	NA	21.5538	21.5741	21.9417	21.8888
P11087	507	Col1a1	1	25.2313	25.6409	24.7623	24.9056	25.168	24.8471	25.442	24.3733	25.2088	25.5475	27.9356	24.6351	25.3313	26.326	25.5078	25.1731	24.2636	25.7155	25.1789	26.0494	25.2067	25.0622	25.9528	25.6379	25.2642	24.9941	26.736	25.4126	27.3571	25.6074	25.7611	26.4014	26.8652	26.2307	25.1807	27.1799	26.9338	25.749	24.4218	25.2204	26.2525	25.4161	25.4483	25.0606	26.7802	26.3485
Q8CIE6	116	Copa	1	22.8461	23.2259	22.9574	22.9002	NA	NA	23.3091	22.941	23.0763	23.4823	23.3242	23.221	NA	23.0729	NA	22.8178	23.0733	22.6971	22.9046	22.5522	23.4837	23.3145	23.2693	NA	22.9946	23.059	23.283	23.2815	23.7559	23.5352	23.5602	23.4457	23.447	23.6827	23.2578	23.7191	23.6685	23.7877	22.9626	22.8853	NA	NA	23.4337	23.2039	23.1803	23.8039
Q9JIF7	85	Copb1	1	22.4368	22.8514	23.0366	22.8387	NA	NA	22.4639	23.0062	23.019	22.9519	22.8911	22.7757	22.7251	23.2255	NA	23.5847	23.3964	23.0207	22.9169	21.6067	21.9665	22.7793	22.76	NA	22.1687	22.7761	23.1514	23.3855	23.3379	23.0656	22.7047	24.3811	NA	23.477	23.2565	23.287	23.4054	22.0759	22.7042	23.6422	NA	NA	22.0649	24.1322	23.1212	23.5277
O55029	45	Copb2	1	21.2349	21.6116	20.4903	20.5228	NA	NA	NA	21.5099	20.2199	21.4721	21.153	20.582	22.1257	21.2836	NA	20.9258	20.7263	20.9553	21.0396	21.0722	20.5474	20.6175	21.5167	NA	20.36	20.777	21.1926	20.3342	21.4505	20.8626	NA	NA	NA	21.5074	20.4159	20.6613	21.1345	21.7687	21.586	21.4584	NA	NA	21.1233	21.3545	21.2108	21.3218
Q9QZE5	91	Copg1	1	22.0554	23.0232	22.6995	22.8243	22.63	NA	22.3419	22.5023	22.3903	23.1035	23.3627	22.8843	22.1827	22.6188	21.6716	23.2913	22.7156	22.8648	22.6035	22.2257	22.7785	22.5664	22.4513	22.0598	24.3585	22.59	23.192	22.9707	23.3544	23.2706	22.582	23.5836	NA	23.5302	22.725	23.1706	22.747	24.0144	24.001	22.4862	23.2214	23.1161	23.4977	23.088	22.9962	23.1437
P61202	41	Cops2	1	21.7133	22.6597	21.6522	22.3809	NA	NA	21.6351	22.414	23.2044	22.7105	21.9996	21.6816	NA	23.0454	NA	22.3982	21.8026	22.0066	22.8039	NA	22.5983	22.6008	NA	22.3372	22.8531	22.0556	22.4908	22.1792	20.6773	20.1822	NA	NA	NA	NA	20.9689	21.4391	21.7492	22.5594	22.4875	22.1256	NA	NA	22.5585	21.7388	21.2992	22.0668
O88544	60	Cops4	1	21.4493	22.0253	21.7575	21.6073	NA	NA	21.891	22.2761	21.9854	22.3139	21.964	21.7868	21.9565	22.1938	NA	21.5103	21.658	22.0169	22.1794	21.5433	21.551	21.9752	21.8524	NA	21.23	21.1838	21.9901	22.6959	21.6399	22.3968	22.1636	22.9785	NA	21.4122	21.8468	21.9448	22.2577	22.2097	22.4049	21.9526	NA	NA	21.7113	21.6831	22.0163	21.9356
O88545	26	Cops6	1	20.7543	21.3077	21.0777	20.2643	NA	NA	NA	21.694	21.0033	21.2376	20.5859	20.6484	NA	NA	NA	21.239	20.6928	20.2982	20.416	NA	21.6059	21.5885	NA	NA	21.3511	21.6126	21.3359	21.8036	20.6523	20.1864	20.7998	21.464	NA	21.1137	20.8636	21.0439	21.1795	21.3065	20.8411	21.2984	NA	NA	20.7595	21.2917	21.1782	21.8997
Q8VBV7	26	Cops8	1	20.8692	21.6539	22.0798	21.7556	21.9632	NA	21.3689	21.6181	21.8368	21.7162	21.5974	21.6958	NA	21.8019	NA	21.6369	21.4339	21.2764	22.059	21.0093	21.5948	21.12	21.2279	20.5558	21.7393	21.599	22.2584	22.1901	21.6363	21.4454	21.958	NA	NA	21.5684	22.152	21.9102	21.9266	21.7251	21.4094	22.1258	21.4864	21.4202	20.9044	21.8316	21.8856	22.0163
Q9WUM3	108	Coro1b	1	23.102	22.8342	22.8629	22.5639	NA	NA	21.9823	22.8058	22.64	22.5168	22.6326	23.3132	22.8899	22.7913	22.0051	22.8361	22.8848	23.0153	23.1846	22.7124	23.8471	22.8383	23.2039	22.82	23.3884	22.9789	22.7818	23.1943	22.5856	23.7851	22.9227	22.842	22.7734	22.7958	22.999	22.2453	22.968	22.6088	23.5206	22.9593	22.9096	22.7346	22.9403	23.1819	23.1594	23.3446
Q9WUM4	86	Coro1c	1	22.724	22.3426	22.9429	22.6549	NA	NA	23.6112	22.428	22.6569	22.4416	22.5006	22.6078	23.8473	22.4128	23.6886	21.3994	21.8656	22.1366	21.7932	22.6226	23.0944	22.2986	22.3628	23.0661	22.9854	22.6732	22.4783	22.5767	22.385	22.4577	23.2153	22.5892	23.6507	23.1681	22.4357	22.6703	22.7074	23.1654	22.763	23.4586	NA	22.4818	23.5964	23.4621	23.0318	22.7306
P12787	48	Cox5a	1	23.5725	22.2275	22.1463	21.4878	NA	NA	NA	NA	21.1373	22.3691	22.1568	21.906	NA	22.2024	NA	22.1594	20.8358	22.0641	22.183	NA	23.9532	22.3725	NA	NA	23.6402	22.2027	23.5332	22.5835	21.883	22.2312	NA	NA	NA	22.5831	22.0567	23.2455	22.9621	22.3846	22.6951	21.8999	23.2476	22.9812	22.4562	21.9	22.269	22.8171
P19536	39	Cox5b	1	22.8206	22.4839	22.6207	23.0837	NA	NA	23.3207	22.9143	22.3704	22.9805	22.4288	22.5957	23.492	NA	23.0955	22.6184	24.6951	22.3387	21.3872	22.7681	22.1002	23.0083	NA	NA	23.1323	22.5464	22.1849	22.6017	NA	NA	22.2944	NA	23.3034	NA	23.0533	22.5267	NA	23.3673	23.4307	22.4099	NA	23.5179	23.2519	22.5602	22.5601	22.4752
P56391	80	Cox6b1	1	22.7248	22.6373	22.7187	22.7371	NA	NA	NA	22.6771	23.0887	23.402	23.1634	23.0267	NA	NA	NA	23.5573	23.3281	23.2561	23.0861	23.6189	21.6675	22.6914	24.0865	NA	21.9366	22.2312	23.3643	23.5236	22.7864	23.858	23.2486	NA	NA	24.0046	22.6092	23.5069	23.5293	23.24	23.3607	22.8573	23.7716	NA	22.6958	23.0533	24.1961	24.3104
Q8BT60	32	Cpne3	1	21.1117	21.6025	21.8357	21.669	NA	NA	20.8234	21.4635	21.8658	21.5473	21.4371	21.6168	NA	20.5042	NA	21.4409	19.7984	20.9343	21.2269	20.0732	20.2727	21.216	NA	NA	20.5472	21.1572	21.1997	21.1196	20.4393	21.4344	21.351	NA	NA	21.1681	21.8312	21.6175	21.5245	21.2773	21.4883	21.9386	NA	NA	20.8835	21.3863	21.8478	21.1375
Q9CZU6	209	Cs	1	24.4667	23.6208	23.7164	23.9509	24.1889	NA	23.6128	24.1688	23.759	23.2654	23.3556	23.7497	NA	23.1418	24.3262	23.6926	23.8835	23.2305	22.447	23.9854	23.7299	22.9646	23.5907	24.196	23.1334	23.3479	23.4056	23.246	23.2725	23.6952	23.3045	24.2344	24.5045	23.2115	23.7624	23.4979	23.3905	22.5208	23.6032	23.3324	24.2943	NA	23.4634	23.4612	23.3661	23.387
Q9ERK4	125	Cse1l	1	22.5868	22.7761	23.0853	23.3697	NA	NA	21.9489	22.7191	22.9383	22.428	22.8037	23.7784	NA	22.906	NA	23.1491	23.0271	22.8959	22.6276	22.577	23.4962	23.4716	23.0989	NA	23.1759	23.179	22.9096	23.327	22.7808	23.1976	22.6022	22.1579	22.4392	22.8967	22.9877	23.037	22.8777	22.8826	22.8356	21.7463	21.774	NA	23.0406	22.6329	22.6805	23.031
Q60737	66	Csnk2a1	1	22.3325	21.6018	22.349	22.8962	NA	NA	22.2089	21.9341	22.4108	21.9834	22.1141	21.7726	NA	NA	NA	22.8429	22.1804	22.21	22.0048	NA	22.6956	22.3057	NA	NA	22.699	22.3654	22.4787	22.4413	22.2967	22.085	22.8792	NA	NA	21.7501	21.7592	21.9308	21.2885	22.1599	22.2336	22.5708	23.2389	NA	22.5623	21.655	22.5416	22.3025
P97315	123	Csrp1	1	23.8884	23.4595	23.5606	23.6736	NA	NA	22.9627	23.3983	23.3255	22.9363	23.571	24.2203	23.6592	23.7427	NA	23.5794	23.0865	23.326	23.0262	23.8208	23.3265	22.9531	23.3265	NA	23.1451	22.6861	23.2985	22.4256	22.8609	24.0006	23.8618	NA	NA	23.3305	23.4187	23.2891	22.5951	23.3155	23.6782	23.9763	NA	NA	22.4617	23.3642	23.7004	23.3176
Q62426	108	Cstb	1	24.9607	21.8532	23.1289	22.6125	NA	NA	23.2988	23.7141	23.1054	22.4352	23.1092	23.0346	24.1544	24.2564	24.9455	23.112	23.5309	23.1908	22.4383	22.9893	23.1851	23.5715	NA	24.8395	22.3595	22.1908	23.0517	22.4617	22.9522	23.0847	23.7295	24.5013	24.8131	23.4004	22.8328	23.0976	23.4733	21.8181	22.7584	22.9745	23.7581	NA	21.9372	23.3886	22.3214	23.3478
P26231	64	Ctnna1	1	22.0351	20.7947	22.4306	21.4603	22.71	NA	21.6614	22.1036	22.4101	22.6108	21.3484	22.7432	22.2042	NA	NA	20.7836	21.24	22.2781	22.0981	22.0892	22.2647	21.823	22.2861	22.057	23.1391	22.8584	22.1776	22.3139	21.8646	22.9553	22.4339	NA	NA	22.2396	21.8894	22.1618	21.6662	NA	21.6852	22.0063	22.508	22.332	22.3065	NA	21.3148	22.1435
P30999	98	Ctnnd1	1	22.5	22.2749	22.8699	22.7738	NA	NA	23.163	22.6284	22.6231	22.788	23.2593	23.5155	23.0312	23.6625	22.8445	23.2836	23.2326	23.4509	22.8205	22.983	23.193	23.1962	23.5864	24.0871	23.2496	23.6165	23.9789	23.3813	23.7711	23.8184	23.3197	23.444	23.1921	23.6738	23.7474	23.5986	24.0509	23.2195	22.2995	23.3666	NA	22.5493	23.146	22.9248	23.0544	22.6356
P70698	123	Ctps1	1	22.5468	22.8998	23.372	22.7523	NA	23.2039	23.3971	23.5942	23.1955	22.4504	23.9097	23.5949	23.4878	23.2231	NA	23.508	23.3605	22.7006	22.2429	22.6767	23.2685	23.1789	22.8198	23.0811	23.2341	23.423	23.3246	23.5957	22.7492	23.5417	23.487	NA	NA	22.8885	23.1687	23.2475	22.442	23.017	22.7466	23.0467	NA	23.2392	23.0583	23.4248	23.0318	22.5481
P16675	60	Ctsa	1	22.2255	24.2061	NA	23.3237	NA	NA	23.4364	22.994	23.103	23.9448	21.9967	22.6021	23.0202	22.6825	NA	22.6481	22.3524	21.9382	21.8988	22.6835	22.9783	22.5956	23.0829	NA	22.6148	22.7156	22.5422	22.4638	23.0648	22.6471	22.3271	23.5117	23.3313	22.9763	22.657	22.1251	22.0563	22.3793	21.9963	22.809	23.6871	23.0098	22.7242	23.3238	22.5594	22.2662
P10605	215	Ctsb	1	25.145	NA	23.8629	23.2486	NA	NA	NA	23.3812	24.011	24.2225	23.9576	24.3009	25.0382	24.2368	25.8551	23.6576	23.3213	23.7423	23.6118	25.0685	24.4617	24.4964	25.0649	NA	23.619	23.7579	23.4868	23.9655	23.8235	24.0171	24.3333	NA	25.332	25.5819	24.0058	23.7791	24.3672	24.2237	23.8844	23.7633	NA	24.6156	24.7444	24.377	24.3422	24.8357
P18242	90	Ctsd	1	23.1548	22.1076	21.9319	21.7174	NA	NA	22.2205	21.5691	21.3618	21.1063	21.4693	21.6603	22.5005	22.3024	23.31	21.4732	22.3253	20.9995	21.1882	22.0472	21.4828	21.3447	NA	NA	21.3398	22.1305	22.0976	21.4379	22.3824	20.9495	22.6375	NA	NA	21.5188	21.422	22.4727	21.7016	21.7775	21.3947	21.1804	22.1832	23.7137	22.1307	21.7581	21.9233	21.7642
P06797	48	Ctsl	1	21.8307	20.6331	20.0283	20.2096	NA	NA	NA	21.9302	19.8221	21.6295	20.6699	20.9713	NA	NA	NA	21.2952	21.2474	21.1573	20.8822	21.6047	21.0928	19.9605	NA	21.388	21.435	21.5758	21.205	20.8458	21.5071	20.867	21.0429	21.4541	NA	21.1073	21.6159	21.3633	20.9666	22.2813	21.5378	NA	NA	NA	22.1928	21.5102	21.5154	21.354
Q9WUU7	104	Ctsz	1	22.7683	23.4563	21.5211	22.5216	NA	NA	22.3023	22.0349	21.2622	22.0482	21.8472	21.0856	NA	NA	NA	NA	NA	NA	21.1024	23.1432	NA	NA	NA	NA	22.0443	22.7173	21.4115	NA	22.4691	21.8576	22.5579	NA	23.33	22.3411	22.0011	22.1393	23.062	22.3331	23.0079	21.9989	NA	NA	21.7501	22.5688	21.5156	22.3007
Q60598	138	Cttn	1	23.1074	23.1096	23.3284	23.1098	NA	NA	23.0866	22.949	23.4156	23.0634	23.6551	23.3956	23.6187	23.2928	NA	22.9513	22.9787	23.5993	23.1877	23.383	23.5083	23.3008	23.3476	23.1833	22.9127	23.1962	23.5542	23.5567	23.6826	23.348	23.563	22.2066	NA	23.3745	23.3638	23.8956	23.5881	24.2209	24.0758	23.9752	NA	23.4017	23.7811	23.8114	24.1686	24.3153
P97792	40	Cxadr	1	21.643	NA	21.0869	21.018	NA	NA	NA	NA	NA	20.1699	21.66	22.255	NA	21.6477	22.0598	21.7869	21.6977	22.2688	22.0271	21.3737	21.2103	21.7168	22.0759	21.682	21.3408	21.1834	22.1233	21.1025	22.0355	20.8957	21.2943	22.3313	21.4986	21.7324	21.4481	21.284	20.5773	20.6229	21.2584	20.8706	NA	21.748	21.4113	22.4555	22.0105	21.1908
P56395	79	Cyb5a	1	24.5166	23.704	23.0575	23.2702	24.5418	24.6337	23.0109	25.1421	22.4217	23.4332	23.8699	23.2218	NA	NA	24.0571	24.155	23.049	23.3286	22.9273	23.2733	22.3558	23.4601	23.5055	NA	22.766	22.8455	22.9418	23.0302	23.2559	23.1713	23.8311	NA	NA	23.0531	23.3185	23.8461	23.4444	23.7556	23.7621	23.5581	24.4457	24.0686	23.0431	23.2513	23.5526	23.6475
Q9DCN2	246	Cyb5r3	1	25.5826	25.0299	24.5696	25.3786	NA	NA	25.4953	24.4029	24.5249	25.2289	25.36	25.5281	24.5213	24.6997	24.5127	24.7366	25.5344	24.6801	25.1834	25.8271	24.6368	24.8152	25.5009	25.134	24.4852	24.8429	24.937	24.7824	25.1107	24.9153	25.2311	25.8533	24.5879	24.955	24.5334	25.2563	25.0627	24.7553	24.9626	24.6866	24.6956	25.4107	25.0887	25.3201	24.7048	25.7923
Q9D0M3	74	Cyc1	1	23.0646	22.609	23.0901	23.1518	NA	NA	23.2536	23.0299	23.1199	23.4698	22.914	22.8296	23.4637	23.0823	23.1646	23.4873	23.6019	23.279	23.5255	24.4545	22.8302	23.4028	23.1579	23.5057	23.0611	23.3285	23.274	22.5351	22.6759	23.6618	23.2058	NA	NA	22.3878	22.971	23.2386	22.2271	22.9599	23.3315	23.6345	23.5143	23.5001	23.6794	23.7332	23.1195	23.4376
P62897	50	Cycs	1	22.772	24.2209	24.0641	24.1721	24.0205	NA	23.6842	24.0484	23.3402	24.0592	23.5018	24.2803	21.9103	22.8628	22.7319	22.9886	22.7177	23.5057	22.4159	23.6177	23.5369	22.4744	23.6552	NA	23.1321	23.1197	24.0207	23.5208	23.5005	23.9202	22.7079	23.1995	22.1001	22.7948	23.2223	23.6405	23.3924	23.1793	24.6046	23.748	23.349	NA	23.6228	23.6662	24.2694	24.2409
Q7TMB8	53	Cyfip1	1	20.6334	NA	21.4276	21.1666	NA	NA	NA	21.1943	21.2295	21.0395	21.9755	21.5297	NA	22.638	21.9966	22.9043	21.7714	20.9344	22.683	22.0752	21.4774	22.4222	NA	NA	22.1637	21.6153	20.6868	21.8676	21.4961	NA	22.0567	NA	NA	21.9438	21.6269	21.2882	NA	21.1598	21.7323	21.3137	NA	NA	21.1515	21.0859	21.6031	21.3985
Q921M7	53	Cyrib	1	21.3508	22.7522	21.9371	22.3639	NA	22.5593	22.6659	22.6366	22.3775	22.4075	21.4103	22.1403	NA	22.5834	22.4667	22.204	22.7769	22.0598	22.1825	22.3854	22.6466	23.5114	22.9014	23.1638	23.1225	22.5852	22.2596	22.3296	22.1091	NA	22.8256	NA	NA	22.5394	22.7913	21.348	21.8803	21.7974	22.728	21.7523	NA	NA	21.8425	22.5183	21.8167	21.4603
P61804	36	Dad1	1	22.2166	22.3036	21.7951	22.5398	NA	NA	22.8094	22.187	21.9693	22.0917	22.5685	23.0909	NA	22.2686	NA	22.5515	22.4594	21.8791	22.6354	22.9307	22.762	22.6229	NA	NA	NA	22.6241	22.6637	23.5153	22.5289	22.6074	21.6338	22.3987	NA	21.8848	22.377	22.862	23.0814	23.0822	22.3678	21.973	22.8032	22.1141	21.6	22.0689	22.2076	22.3377
Q922B2	158	Dars1	1	23.3926	24.0538	24.0735	23.8137	24.5846	24.4744	23.4285	24.0314	24.0617	24.0536	23.9325	24.4337	23.5245	23.8106	25.0952	24.3862	24.0242	24.0018	24.1675	23.4205	24.3114	23.8569	24.049	24.4284	24.2421	24.0106	23.9321	24.1852	23.9424	24.4175	24.0707	23.6967	24.5528	23.802	24.1748	23.9443	23.7632	23.8414	23.9565	23.9152	23.6219	24.4168	23.3194	23.483	23.8632	23.4839
Q9QXS6	107	Dbn1	1	22.7377	23.5266	22.6526	22.3852	NA	NA	23.5662	22.9381	22.7807	22.8467	23.0239	22.6876	NA	22.7126	NA	23.3013	NA	22.6278	22.7571	23.4433	23.5992	23.0546	22.2405	23.7875	23.3962	22.9759	22.9856	23.0499	22.8055	23.0882	23.611	NA	24.0912	23.1042	22.7762	22.7241	23.6767	23.6613	NA	22.3788	NA	NA	23.7906	23.2349	22.6537	22.3728
Q62418	85	Dbnl	1	22.2912	22.2019	21.9889	22.5278	NA	NA	23.1314	22.1897	22.1277	22.5204	22.4399	22.7323	NA	NA	NA	22.1832	22.8801	22.375	22.4885	22.7306	22.4605	22.8338	23.1434	NA	23.4186	22.6054	22.8923	22.983	22.7324	22.3786	23.1032	NA	NA	22.6914	22.5491	23.1896	22.865	22.7033	22.1788	22.1005	NA	NA	22.5413	22.8236	22.6191	22.5465
Q99KJ8	88	Dctn2	1	22.1018	21.9725	21.798	21.9619	NA	22.7716	22.1002	22.5075	21.5899	22.2301	22.359	22.8593	22.9424	21.9011	22.0179	22.6622	23.1352	22.4952	22.9923	22.0893	21.9037	20.354	22.2678	22.8061	21.8703	21.6183	22.1319	21.9351	NA	NA	NA	NA	NA	NA	22.8178	22.0674	22.5912	22.2321	22.8428	21.6489	23.0158	22.8766	21.901	23.0525	21.2745	21.8067
Q3U1J4	137	Ddb1	1	22.67	22.1643	22.4844	22.0469	NA	NA	22.7362	22.3854	22.688	22.1904	21.959	21.8102	22.1694	NA	22.5884	21.8035	22.8091	21.4563	21.596	22.8135	22.5565	22.8463	NA	22.6011	23.0445	22.6592	22.6723	21.7258	22.0596	22.6694	22.8533	23.2401	22.6304	22.8961	22.2984	22.0363	21.9709	21.9483	21.4756	21.8685	NA	22.8487	21.9418	21.5372	22.5769	22.1537
O54734	182	Ddost	1	23.8016	23.514	22.9194	24.1063	23.4041	NA	24.0416	23.6419	23.5022	24.159	24.1203	23.4168	22.69	23.5096	24.1889	24.1921	24.0286	23.9153	24.2436	23.9376	23.1368	22.6011	23.4572	23.8591	23.2502	23.5685	23.837	23.4916	23.3567	23.4327	24.0353	24.1354	24.439	23.2671	23.5237	23.7467	24.0006	23.7517	23.5325	23.5087	23.6197	NA	23.3738	23.3302	23.7131	23.5658
Q91VR5	75	Ddx1	1	21.5588	21.5473	22.6735	22.166	NA	NA	22.2603	22.1883	22.0412	22.3107	22.4229	23.2216	22.5217	23.0015	NA	22.0132	23.2543	22.251	22.4119	22.4846	21.9695	20.6572	22.4593	NA	22.5609	22.6262	22.0942	22.2501	22.3894	22.8731	22.4271	NA	NA	22.6567	22.1031	22.7906	22.3326	22.6088	22.0933	22.5965	22.7079	22.4976	22.2889	22.6106	21.1819	22.0386
Q501J6	104	Ddx17	1	23.0006	23.8106	23.469	23.1012	NA	NA	23.2015	22.9887	23.2092	23.7256	23.5856	23.4022	NA	24.2243	NA	23.2906	23.0871	23.6309	23.4694	NA	23.6381	23.0724	23.4274	22.7515	22.9071	22.7676	23.0071	23.0712	23.2929	22.9542	23.0493	23.7422	23.0396	23.2893	23.2303	23.739	23.1567	22.6436	23.102	22.8487	23.0723	NA	23.5317	22.5763	23.1208	22.929
Q9JIK5	83	Ddx21	1	21.4978	21.7931	21.6536	21.1786	NA	NA	21.9268	21.3835	22.2284	21.5086	21.9385	21.7397	22.8612	NA	22.6262	21.7035	21.202	21.2884	21.6279	NA	21.2135	22.0072	NA	NA	22.5809	23.2854	22.1466	22.7857	20.9801	21.3962	21.2393	NA	22.2443	21.5814	21.4164	21.5729	21.1446	21.336	21.6571	22.1403	NA	NA	21.2963	21.5206	21.7441	21.3557
Q9Z1N5	182	Ddx39b	1	24.4347	23.4435	24.2854	23.6667	NA	NA	23.8572	23.6825	23.4827	23.2529	24.5534	24.6512	23.881	23.7991	NA	24.4925	24.8094	23.7795	24.0957	23.3857	24.5088	23.6735	24.248	23.7168	24.183	24.4375	23.6278	24.0323	24.1428	24.9579	24.7145	23.9062	NA	24.6701	24.6482	24.0108	24.3774	23.7225	25.0207	25.1449	24.1537	24.5622	24.4849	24.3057	24.1013	23.2947
Q62167	123	Ddx3x	1	22.4054	23.1228	22.5885	23.0253	NA	NA	23.3236	22.8517	22.8539	23.0563	23.0634	22.5887	22.5358	22.573	22.9136	22.1556	22.5713	23.1525	22.4891	22.3235	22.8573	22.8908	NA	22.9652	22.8871	22.6228	22.9644	22.9862	22.8799	23.1513	22.8707	NA	22.8766	22.4256	22.8393	23.2073	22.8722	23.0482	23.0612	22.4728	NA	NA	22.8247	22.7227	23.0389	22.5933
Q61656	313	Ddx5	1	24.3632	24.7442	25.1425	24.8417	24.1827	24.316	24.2442	24.6664	24.8749	24.8687	24.217	24.764	24.268	24.5856	24.7224	24.1572	23.9878	24.8591	24.4953	23.6069	24.1712	24.1588	24.7409	24.3799	24.1503	24.1648	24.7901	24.3318	24.1101	24.2088	23.8938	23.8631	24.183	24.0514	24.5305	24.3013	24.2537	24.3666	24.5796	24.5446	23.6407	24.3813	24.2889	24.4374	24.3601	24.2827
P54823	50	Ddx6	1	21.6065	21.7977	21.0397	20.8952	NA	NA	NA	21.4804	21.4201	NA	21.911	21.5103	NA	21.743	NA	21.3434	21.8556	21.5922	21.9009	NA	22.1035	21.763	NA	22.0764	22.5552	21.3655	21.7935	22.1694	21.9818	21.8336	22.0465	NA	NA	21.7826	21.3608	22.1095	22.6018	22.175	21.7373	21.5861	NA	NA	21.8947	NA	22.1564	21.557
Q9CQ62	64	Decr1	1	21.9132	NA	22.2893	22.0596	NA	NA	22.4928	22.8396	23.1109	22.4236	NA	NA	NA	NA	NA	NA	NA	NA	NA	22.073	20.4644	22.1061	NA	NA	21.9101	20.4265	20.8801	21.6653	22.2372	21.1293	21.9494	22.1645	NA	21.5364	21.5806	21.3077	21.5861	20.5133	21.4118	20.944	NA	NA	NA	21.0327	21.2373	NA
Q99J56	37	Derl1	1	21.6712	22.0194	22.0525	21.5546	NA	NA	21.3928	21.0825	20.3968	22.0845	21.5561	21.3039	NA	NA	NA	NA	NA	21.3345	20.8829	21.0841	21.0404	20.6902	NA	NA	20.4977	20.4936	21.4115	21.5222	22.8317	21.8788	22.1765	NA	NA	21.7019	20.9333	22.93	22.7078	22.2586	21.8777	21.7799	21.7488	NA	21.2641	21.4676	22.1862	22.4907
O35286	81	Dhx15	1	22.4868	23.133	22.9674	22.5275	NA	NA	23.3828	22.321	22.3036	23.0778	22.4537	22.9223	23.1529	23.2891	NA	22.1124	23.1171	23.2867	23.1062	22.3942	23.0914	23.4615	NA	NA	22.6223	21.9689	22.651	22.8089	21.93	23.3124	22.6018	NA	NA	22.2847	22.5387	22.9292	22.4483	22.485	22.9084	22.7011	NA	NA	23.028	23.0109	23.029	22.4488
O70133	202	Dhx9	1	23.4733	23.5529	23.6594	23.5795	24.3637	24.3541	25.2068	24.0434	23.6473	23.7679	23.3113	23.1547	24.5589	22.8652	23.2347	23.4926	24.7005	23.1045	22.866	24.327	23.9342	24.1496	24.6234	24.1222	24.445	23.5927	24.0934	23.5326	22.9715	23.3261	24.9803	23.2226	25.346	23.9112	23.0453	23.5113	23.0654	23.6443	24.0678	23.6074	24.1599	24.1801	24.3268	23.6867	23.3752	23.5442
Q8BMF4	67	Dlat	1	21.9002	22.8741	22.7369	22.6323	NA	NA	23.0549	23.2015	22.5606	NA	22.6179	22.0572	21.0899	21.5131	NA	22.3604	21.5758	21.9036	23.1112	NA	NA	NA	NA	NA	NA	22.5255	NA	NA	22.019	21.749	21.5305	22.0888	20.635	22.0269	21.9781	21.7602	21.5763	22.2487	21.8448	21.6945	20.9865	21.4673	21.6127	21.5126	22.3892	22.0222
O08749	36	Dld	1	20.6951	21.3516	20.0179	20.6541	NA	NA	21.3073	20.728	20.2172	20.3112	19.5423	20.2313	NA	NA	NA	NA	NA	20.7537	NA	20.572	20.6252	NA	NA	NA	19.9926	20.1107	19.8465	19.8645	20.2297	20.292	20.2101	NA	NA	20.402	19.8228	20.4561	20.4515	NA	NA	22.4057	NA	NA	22.4419	22.0812	21.0902	NA
Q9D2G2	42	Dlst	1	21.6886	21.7137	21.7064	22.5459	NA	NA	21.6301	21.8862	21.9261	21.5358	22.7628	22.2445	22.8695	NA	NA	NA	22.9541	NA	NA	21.5413	21.2522	21.5689	21.4297	21.4166	22.0349	21.2824	21.3046	20.9254	20.7097	20.5079	20.8792	NA	NA	20.5279	20.6607	20.7558	20.4245	NA	NA	NA	NA	NA	NA	NA	NA	NA
P63037	47	Dnaja1	1	22.1783	23.0546	22.8195	22.7825	NA	NA	22.4123	23.8966	23.2464	23.1297	22.7147	23.3344	22.9948	23.2909	NA	22.4432	22.5032	22.647	22.2458	21.4212	22.7561	22.062	NA	NA	22.0397	22.6813	22.7507	22.6535	22.4103	22.6848	22.1898	NA	21.7775	21.8103	22.8343	23.0319	22.6697	22.6829	23.0112	22.6896	NA	22.4133	22.2763	22.5136	23.0313	22.9166
Q9QYJ0	55	Dnaja2	1	22.0152	21.8787	22.692	22.807	NA	NA	22.3993	22.4862	22.0908	21.7699	21.9088	22.2022	NA	21.2342	NA	21.9097	21.9557	21.6528	21.4465	22.5759	22.971	22.4694	22.4265	22.0517	22.4329	22.349	22.311	22.7398	21.3884	22.5699	21.0515	NA	NA	20.4331	22.1903	21.7028	22.0172	21.6784	22.3039	23.1271	21.7751	21.4428	21.6596	22.3643	22.69	22.5568
Q99KV1	39	Dnajb11	1	21.6966	22.2453	22.1868	20.5843	22.425	NA	21.8229	21.2673	21.7936	22.3171	23.6032	22.3109	22.7487	22.0781	22.0671	22.0578	22.4005	22.835	23.1065	22.7261	22.4624	22.7338	22.3214	22.9751	22.1049	22.183	22.8718	21.9906	22.2592	22.9169	23.5562	NA	23.5165	23.6763	21.93	23.1795	22.6216	NA	NA	22.8314	NA	NA	22.1819	NA	22.5761	23.019
Q9DC23	52	Dnajc10	1	21.1762	21.0566	21.4092	21.7196	NA	NA	21.3863	21.8289	21.0682	21.4657	21.5739	21.175	21.1642	21.9006	NA	22.0642	21.1811	22.0719	21.5188	21.7029	20.9335	20.543	21.37	NA	22.3165	21.8609	20.8585	21.3214	21.9731	21.5768	21.2025	21.7526	NA	21.5119	20.8672	21.8143	22.0223	21.2636	21.7309	21.6539	21.4469	21.4812	20.6081	21.5957	21.3873	22.2702
Q8K1M6	43	Dnm1l	1	20.3124	NA	20.8792	NA	NA	NA	NA	20.4726	NA	20.8779	21.6503	20.47	NA	21.722	NA	20.3569	21.6225	21.8876	21.8052	20.9143	21.4536	21.047	21.2952	21.2579	20.7436	20.7485	20.951	20.7294	20.6085	20.4764	21.1572	NA	NA	21.1597	20.2929	20.4983	20.6598	22.0815	21.5369	20.8042	NA	NA	21.1175	21.1072	21.7774	21.7553
P39054	36	Dnm2	1	21.1248	21.1956	22.1697	21.3192	NA	NA	21.1005	21.6154	21.7144	21.9775	NA	21.7965	NA	NA	22.6583	22.7944	24.0176	NA	21.5525	23.3336	21.3446	21.1202	21.5012	NA	21.0035	21.6925	21.9932	21.6642	21.4104	21.0776	20.4731	NA	NA	21.4373	21.015	21.4209	21.4499	21.5812	22.1813	22.2321	NA	NA	22.3918	22.3961	22.6931	21.7595
Q99KK7	68	Dpp3	1	21.8885	NA	NA	21.9183	NA	NA	NA	21.3339	21.8451	21.3867	20.942	NA	NA	NA	NA	NA	21.7214	21.4042	21.7134	22.5041	22.3003	NA	NA	NA	23.3782	22.0688	21.3917	22.4759	22.1568	22.798	23.1586	23.0778	22.8578	21.8492	23.251	21.889	21.8884	21.6047	20.8114	21.3758	NA	NA	22.2384	21.4937	20.8895	21.6377
O08553	201	Dpysl2	1	24.2106	24.7179	24.3296	24.2724	NA	NA	23.764	24.5941	24.0145	24.4809	24.2211	24.6659	24.1545	24.5496	NA	24.1547	24.3087	23.6668	23.9075	24.1384	24.6469	24.5686	23.9153	24.1651	24.1196	23.7687	24.0648	23.9455	24.4127	24.6437	24.3027	23.6124	23.4413	24.7935	24.2042	24.3235	24.5565	24.6962	24.4989	24.887	NA	NA	23.3468	24.3159	23.9473	24.3722
Q9R0P5	92	Dstn	1	23.8137	23.1846	23.4735	23.4522	NA	NA	22.6143	23.2254	23.4437	23.5508	24.2956	23.3772	23.5087	23.1679	NA	23.8137	23.4754	24.0064	23.1146	23.5977	24.1646	23.9662	22.6957	NA	23.6623	23.9972	24.005	22.9384	23.2479	23.8971	23.6023	NA	22.7128	23.2148	23.4656	23.2515	24.4461	23.1627	23.5077	22.8234	24.1913	NA	23.3978	23.3015	23.2582	23.6134
Q9JHU4	418	Dync1h1	1	23.2059	23.566	23.3941	23.5002	NA	NA	23.2608	23.4414	23.6149	23.9398	23.7659	23.6472	23.2609	23.7166	24.2145	23.7497	23.3003	23.9048	23.8233	23.3651	23.2732	23.5205	23.5285	23.9261	23.3533	23.6258	23.5688	23.4411	23.3758	23.3544	23.5975	23.4675	23.8164	23.382	23.5647	23.6682	23.3493	23.6257	23.5271	23.1882	NA	23.6835	23.4278	23.3786	23.6847	23.5419
O88487	97	Dync1i2	1	22.519	22.4145	23.4122	23.3252	NA	NA	22.5201	22.7125	23.0252	23.6874	23.2746	23.0546	NA	23.1256	NA	23.1801	22.7525	23.247	23.2461	22.718	22.3919	22.8915	23.0454	22.4724	22.6588	22.9806	23.1217	23.0577	23.1136	22.4996	23.1467	NA	23.3103	22.9313	22.7849	23.1192	23.1402	23.804	23.3049	23.2311	NA	NA	23.3864	22.9035	23.7467	23.7759
Q45VK7	23	Dync2h1	0.997	21.6324	20.8406	21.174	20.9989	21.7716	NA	21.4805	21.5138	21.6456	21.6514	18.5949	19.231	NA	20.4235	NA	18.8082	19.3779	19.063	NA	NA	NA	NA	NA	NA	20.5296	20.1465	19.5095	20.5042	19.3708	19.1186	19.5096	NA	NA	NA	18.6438	19.766	18.8463	20.8265	19.7551	19.7516	NA	NA	19.8254	NA	20.4415	20.8659
P63168	39	Dynll1	1	23.6468	22.6545	23.0292	24.1248	23.3218	NA	23.9568	22.7853	23.6774	24.1138	21.8739	22.4811	22.3879	21.2185	NA	21.5677	21.1774	21.993	21.7833	22.8445	22.4769	23.1806	22.7741	22.594	23.4261	23.2728	22.761	23.18	22.0347	22.807	22.2364	23.0849	22.7599	21.777	22.5268	22.6139	22.9641	22.9068	22.8151	22.2664	22.9783	22.7331	22.9208	22.2139	23.1174	22.6992
P62627	56	Dynlrb1	1	22.3292	22.0117	22.0552	22.3617	NA	NA	21.9138	21.9055	21.6301	20.9079	21.7302	22.6501	NA	NA	NA	22.28	21.4991	22.1261	22.4946	22.4894	22.6902	22.0679	21.6767	NA	22.3051	22.7557	22.5355	22.3832	23.0741	22.8709	23.2375	NA	NA	22.5893	22.5064	22.9235	22.7811	22.2207	22.5554	22.8434	NA	NA	22.7706	22.3866	23.1122	22.7907
Q8BH95	48	Echs1	1	21.8288	21.1784	20.7556	20.6388	NA	NA	NA	20.8344	21.6895	22.0212	NA	21.7552	NA	NA	NA	21.5746	22.8017	21.1794	NA	NA	NA	NA	NA	NA	NA	21.053	21.5756	21.313	22.7772	20.8892	22.1184	NA	23.1551	21.7664	21.4103	21.9946	22.0617	NA	21.0198	21.7659	22.3331	NA	21.3507	21.5449	21.2977	21.3905
P42125	45	Eci1	1	21.872	22.3324	21.6827	22.3118	NA	NA	21.9654	22.588	21.7724	22.4125	21.5266	21.8894	22.6727	21.9974	NA	22.4486	21.9439	21.6466	21.7655	22.5898	22.8584	21.6095	22.1047	NA	21.7653	21.6329	22.0805	21.948	21.4564	20.9934	22.068	22.0014	NA	21.6569	22.2369	21.6004	21.8438	21.7148	21.4896	20.4455	NA	NA	21.9617	NA	21.2289	22.0329
P10126	634	Eef1a1	1	28.342	28.0535	28.1131	28.0442	27.4876	26.9782	27.0056	28.0316	28.2141	28.1022	28.7783	28.533	27.7518	28.1496	26.6674	28.3839	28.0899	28.7284	28.7938	26.9359	28.0898	28.2104	27.9127	27.1753	27.7615	28.0264	28.6067	28.6221	28.3888	28.2624	27.9917	26.911	27.0485	28.021	27.9289	28.5995	28.4335	28.6637	28.0787	28.4711	27.2053	27.0636	28.061	28.0695	28.6479	28.4652
O70251	170	Eef1b	1	25.6436	25.4933	24.2398	24.8574	25.5604	NA	24.7467	24.4708	25.3082	25.6043	26.2736	25.5979	24.5371	25.4886	24.1227	25.0031	25.3078	25.2751	25.8736	24.5162	25.5838	25.3253	25.1322	24.6967	24.9444	25.0065	25.3378	25.4386	25.7988	25.6645	25.2325	24.1858	24.4217	24.8855	25.0968	25.7483	25.862	25.9937	24.688	25.4922	25.1538	24.3954	25.0054	24.5845	25.3437	25.5413
P57776	335	Eef1d	1	25.9408	26.0482	25.6645	25.8299	25.6342	NA	24.9517	25.2605	26.2248	25.9953	26.1868	25.8088	25.3385	25.7437	26.507	25.0838	25.4554	25.8094	25.9922	24.429	25.7126	25.7298	25.1119	25.1528	25.1168	25.5466	25.805	25.8473	25.7012	25.8311	24.9801	24.1034	26.3202	25.1161	25.6683	26.0411	25.9387	26.135	25.4148	25.9281	24.4845	NA	25.2208	25.1649	25.8564	26.2223
Q9D8N0	414	Eef1g	1	26.2458	26.1705	25.8437	25.5757	25.3653	26.0632	25.278	25.8781	26.2225	26.2697	26.6745	26.3423	25.4854	26.1669	25.8454	25.4144	26.1607	26.3362	26.4637	25.902	26.2004	26.1799	26.3674	25.7146	25.9719	26.1316	26.1275	26.3267	26.2062	25.8436	25.7741	25.0138	25.7347	25.8899	25.7323	26.4059	26.3709	26.7355	25.6323	26.1931	25.1792	26.0316	25.596	25.5713	26.2156	26.4878
P58252	811	Eef2	1	25.9567	25.4789	24.97	25.2001	25.3957	NA	24.728	24.706	25.114	25.2549	25.9295	25.7197	25.2879	25.341	24.7556	25.4483	25.5069	25.0817	25.4189	24.6759	25.5431	25.489	25.3141	25.0281	24.8654	24.9969	25.3093	25.6039	25.9265	26.1111	25.5031	25.2613	25.0133	25.5017	25.875	26.1679	26.1095	25.703	25.9504	25.6932	24.8296	25.7642	25.0069	25.6384	25.5878	25.7396
O08810	130	Eftud2	1	22.3866	23.3779	22.8333	24.0245	NA	NA	23.4659	23.1135	23.119	23.841	22.6508	22.2142	22.2251	NA	NA	22.6166	22.3955	22.4722	22.5818	22.4386	22.2637	22.7769	NA	NA	22.6767	22.6549	22.1773	21.8569	22.4415	22.0105	22.9202	23.215	NA	22.708	22.7713	22.3281	22.4406	22.2737	22.5057	22.8334	22.5941	NA	22.7862	22.7247	23.0722	22.5614
Q9WVK4	159	Ehd1	1	23.0465	23.7716	23.8492	23.6718	23.8454	NA	23.2785	23.9344	23.5378	24.1053	23.8577	24.4411	23.632	24.3365	NA	23.1272	23.3135	24.2613	23.5728	NA	23.4576	23.2949	23.6445	23.7543	23.7103	23.4634	24.0214	23.1702	23.5937	24.0706	23.6444	NA	23.4353	23.6206	23.7599	24.617	24.0778	23.7819	23.3451	23.5524	NA	NA	23.3654	23.446	23.8084	24.1937
Q8BH64	43	Ehd2	1	21.4553	22.7174	22.4382	21.0984	NA	NA	22.3019	22.0247	21.9952	22.8009	NA	NA	NA	NA	NA	NA	NA	NA	NA	NA	NA	NA	NA	NA	NA	NA	21.1788	22.6419	21.6381	21.6649	22.1608	NA	NA	22.1223	20.9378	22.4384	22.2215	21.9361	22.1467	21.7373	NA	NA	22.5706	21.6463	22.7938	22.4882
P48024	48	Eif1	1	23.1089	24.0305	23.9334	23.732	NA	NA	22.7673	23.6516	23.6289	23.8719	23.7945	24.1731	NA	24.2379	NA	23.2714	23.3823	23.5648	23.6759	NA	22.9009	23.195	23.7075	23.2501	23.4507	23.1856	24.0206	23.8798	23.9111	24.5419	23.4296	NA	NA	23.9973	23.258	24.1337	23.9562	24.0528	23.8533	24.0029	NA	NA	23.7699	23.1599	24.2113	23.4873
Q6ZWX6	101	Eif2s1	1	22.7672	23.0778	23.7842	23.0553	NA	NA	22.0119	22.7228	23.4981	23.2186	23.3325	23.4679	22.7307	22.4744	NA	22.7494	23.4544	23.164	23.3728	21.936	22.9229	22.6239	22.8067	NA	22.5705	22.7966	22.892	23.2079	22.4223	22.6005	22.2237	NA	NA	22.5662	22.8187	22.7043	23.0836	23.1668	23.4572	23.0186	NA	NA	22.9588	22.6265	23.1082	23.197
Q99L45	80	Eif2s2	1	22.5473	23.1881	23.8623	23.262	NA	NA	22.5447	23.6328	24.0944	23.6357	22.8431	22.3647	22.4373	22.9709	NA	21.9579	22.8561	22.1664	22.2551	23.9982	23.0946	22.7295	23.8333	22.9542	23.1245	22.6746	23.0428	23.0646	22.7869	23.0139	22.0876	NA	NA	22.6736	22.6775	22.5178	22.6196	23.0762	22.5677	22.4748	NA	NA	22.415	22.4818	22.3889	22.5716
Q9Z0N1	50	Eif2s3x	1	21.4503	21.7712	21.7041	21.3353	NA	NA	NA	20.9162	21.0317	21.2184	NA	21.3669	NA	NA	NA	22.2508	NA	20.7485	21.4717	NA	NA	21.0383	NA	NA	21.7415	NA	21.5328	NA	21.6166	21.013	21.4625	NA	NA	21.2673	21.1493	21.3109	21.3504	21.7267	21.6036	21.2223	NA	22.1217	22.0267	21.7618	22.0946	22.3843
P23116	194	Eif3a	1	23.0383	23.2185	22.9825	23.3446	NA	NA	22.492	23.0294	23.1206	23.4403	23.882	23.8734	23.2261	23.8288	NA	24.3656	24.0799	23.7351	23.5724	23.5091	23.6299	23.679	24.0193	24.5815	23.4744	23.3857	23.899	23.7368	23.2214	23.4174	22.619	NA	23.925	22.8917	23.0297	23.4776	23.2923	24.5378	23.3761	23.5679	24.5303	24.8476	24.0827	23.684	23.511	23.6628
Q8JZQ9	185	Eif3b	1	22.7261	22.2659	22.3269	22.1855	NA	NA	22.4757	22.3493	22.7518	22.1646	22.6294	22.8632	NA	23.2531	NA	23.063	22.8924	22.4676	23.0385	22.858	22.2651	23.1848	22.9309	NA	22.8453	23.0014	22.9947	23.562	22.9923	22.4212	22.2746	NA	NA	22.9475	22.7766	22.7965	22.6327	23.2602	22.1714	22.5253	NA	NA	23.16	22.5711	22.5586	22.8521
Q8R1B4	107	Eif3c	1	22.6125	22.2642	22.5665	22.7534	NA	NA	22.0387	22.0993	22.4735	22.6502	22.9421	22.8816	22.4461	23.5258	NA	22.572	22.7849	22.7167	23.5426	22.2884	22.7652	22.4981	22.6861	23.3117	22.5119	22.6637	22.243	22.6474	22.2796	22.9931	22.6842	NA	22.2548	22.7501	22.6024	23.1061	22.8888	23.3573	22.5669	22.7062	NA	NA	22.693	22.2985	23.0151	22.9119
O70194	104	Eif3d	1	22.5398	22.6881	22.6503	22.79	22.6521	22.1841	22.6335	22.6214	22.5122	22.4729	22.7224	23.1833	22.9472	23.2444	22.7993	22.8604	22.7836	23.1162	23.2722	23.0884	23.4517	23.2596	23.0031	22.7559	23.7205	23.6418	23.4002	23.1147	23.3284	23.5792	23.16	22.93	23.1187	23.281	22.5083	23.3223	22.7406	23.0353	23.3793	23.3167	23.0848	23.061	22.9432	23.1857	23.3716	23.1677
P60229	110	Eif3e	1	22.737	22.4962	22.6906	22.7403	NA	NA	22.952	22.2787	22.8194	22.7507	23.2884	23.1502	NA	22.9244	NA	23.1951	23.5379	22.8613	23.2579	22.3795	22.888	22.9002	23.1064	NA	22.5246	22.7417	23.1698	22.8541	22.7948	23.4134	23.5404	24.0464	NA	23.2328	22.7837	22.9433	22.8069	23.1626	22.314	22.9191	NA	24.0731	22.5814	22.4442	23.232	22.6139
Q9DCH4	82	Eif3f	1	22.9136	23.1473	22.7361	22.7454	NA	NA	23.471	23.09	23.2389	23.3249	22.2713	22.9138	NA	22.3708	23.6262	22.8737	21.9367	22.8677	22.6173	23.0741	22.5204	22.025	23.3247	NA	22.7536	22.6729	22.8028	23.7103	23.0178	22.2344	23.6061	23.2979	NA	22.6383	22.0757	22.9829	22.7333	23.2047	23.0275	22.865	NA	23.4131	22.8176	22.691	22.841	22.5449
Q9Z1D1	49	Eif3g	1	22.0289	22.3329	22.3074	21.8547	22.0527	NA	21.9566	22.1922	22.6281	22.0879	21.4578	21.6068	NA	21.2583	NA	21.5088	21.816	21.5697	22.0455	21.3621	22.4381	22.1931	21.9914	NA	22.1869	22.0292	22.6112	22.5506	23.2708	23.6773	22.8534	NA	NA	22.837	23.2654	22.2382	23.3835	23.2576	22.3987	22.9248	NA	NA	22.8552	22.5741	23.0772	23.1024
Q9QZD9	74	Eif3i	1	22.2862	23.1247	21.6459	21.0678	NA	NA	22.9615	21.0648	21.7765	21.1249	22.2412	21.6528	NA	NA	NA	22.7324	22.5397	22.0393	21.8819	NA	21.2788	21.7448	21.8247	NA	21.5745	21.337	22.2255	21.5237	22.0637	21.9179	21.9042	23.296	NA	22.1345	NA	22.3445	22.0394	22.6233	21.514	21.8617	NA	NA	22.8984	22.7248	22.7973	21.9186
Q9DBZ5	41	Eif3k	1	21.6614	20.2012	21.6736	20.1217	NA	NA	20.945	21.0924	20.7947	NA	19.9892	NA	NA	NA	NA	NA	20.8817	20.6388	20.0013	21.0224	21.3202	21.0659	NA	NA	20.8124	21.2002	20.9491	20.8891	21.0686	20.886	21.1092	NA	21.5575	21.2786	21.0337	20.481	20.8597	20.9007	21.2085	20.8662	NA	NA	21.8199	20.9079	21.1493	21.2192
Q8QZY1	169	Eif3l	1	22.6925	23.0092	22.8044	22.8073	NA	NA	22.9577	22.9517	23.2185	22.8897	23.1885	23.2272	23.179	23.2108	23.1883	23.2837	23.2931	23.226	22.9656	23.2356	23.067	22.7959	22.7498	23.5206	23.0875	22.7976	22.9361	23.1599	22.8434	22.9156	23.1066	23.8891	23.2023	22.7162	22.5231	22.7499	23.1348	23.0725	23.2542	22.8281	23.0904	23.252	23.02	23.1916	22.8097	23.0336
P60843	293	Eif4a1	1	24.8819	25.3697	25.2992	25.3194	24.5725	NA	23.9934	25.1024	25.7685	25.0581	25.5365	25.7679	24.2997	24.9289	23.6087	24.6542	24.9621	25.5542	25.4239	24.5716	24.8546	25.0326	24.9713	24.348	25.0579	24.703	25.0752	25.7251	25.5171	25.6199	25.1941	24.513	24.1953	25.0482	25.3266	25.7678	25.9022	25.7831	25.821	25.6548	24.4636	24.3878	25.5908	25.319	25.5063	25.5798
Q91VC3	87	Eif4a3	1	22.4811	22.7946	22.9804	22.6221	NA	NA	22.4898	22.7897	22.876	22.2406	23.0745	23.0565	22.2146	22.4062	NA	22.6718	23.3082	22.9572	23.0613	23.2948	23.2847	22.6494	23.2416	21.9834	22.8727	23.1273	22.7438	23.118	22.6164	22.7624	22.9026	22.5187	NA	22.6277	23.1387	22.9326	22.6063	23.3365	23.2237	23.2225	23.2734	22.299	23.2159	23.0101	22.8828	22.9635
Q8BGD9	184	Eif4b	1	23.6392	24.2136	24.023	24.7381	24.2523	NA	23.7475	24.4154	23.9	24.1522	24.4352	24.4714	24.0186	24.0525	23.2271	24.1822	24.2967	24.2002	23.6721	23.672	24.6511	24.3527	23.9911	22.2724	23.8012	24.0192	24.5266	24.0964	23.7611	24.3435	24.8034	22.2102	22.9926	24.1596	24.0866	24.1027	23.8862	24.5967	24.0797	24.815	23.1841	23.2174	24.0015	24.1307	24.3259	24.5138
P63073	43	Eif4e	1	21.9375	20.5992	21.5365	21.143	NA	NA	NA	21.3619	21.1598	21.6051	21.9309	21.5563	NA	NA	NA	21.7425	20.9546	21.965	21.6766	NA	21.4604	22.7244	NA	NA	20.84	22.5019	20.9594	21.3258	20.9449	20.6787	21.1629	NA	NA	NA	21.5753	22.2254	21.855	21.5846	22.3493	NA	NA	NA	NA	NA	22.8026	22.7523
Q6NZJ6	130	Eif4g1	1	22.3296	22.8642	23.2014	23.1351	NA	NA	22.3353	22.8156	23.1947	22.8624	22.9008	23.1078	22.5863	22.5117	NA	22.7743	22.4875	22.787	22.4269	22.2536	22.9764	22.717	22.7145	NA	22.9852	22.9908	22.9339	23.0097	22.636	22.6581	22.7583	NA	22.6216	22.3808	22.7228	23.0639	23.124	23.1647	23.0157	23.2778	NA	NA	22.6257	22.2726	23.2583	23.3444
Q9WUK2	78	Eif4h	1	23.1275	23.2964	23.4808	22.7675	NA	23.6215	NA	22.7573	22.7031	23.7547	23.252	23.7875	22.9083	23.0763	NA	23.3222	22.4764	23.0584	23.176	23.1606	23.8672	23.0318	23.6005	22.6651	23.2122	23.1258	23.4883	24.1741	22.6658	23.1354	22.7409	NA	NA	22.5055	22.6801	23.5126	22.7659	23.7799	24.231	23.2826	23.1439	NA	23.7614	23.1478	23.3778	23.0849
P63242	162	Eif5a	1	25.3157	25.5389	24.9386	24.6819	25.2408	24.5994	24.1584	24.9568	25.7942	25.2831	26.2136	25.5711	25.3624	25.5367	24.348	25.4975	25.0271	25.5014	25.5179	25.1597	26.2634	25.2039	25.0303	25.1156	25.5924	25.5177	25.7889	25.8522	25.8934	25.9158	24.9791	24.1145	24.6698	24.6366	24.6933	25.6624	25.271	25.8465	25.9414	25.77	24.2914	24.9015	25.1447	25.5449	25.4518	25.7067
O55135	64	Eif6	1	22.2715	21.696	22.3818	22.2319	NA	NA	22.4838	21.6564	22.1538	20.99	NA	NA	NA	NA	NA	NA	NA	NA	NA	22.9762	21.017	21.3839	NA	NA	22.3591	21.4565	21.7614	21.6254	20.7719	NA	21.1221	NA	NA	23.7245	23.1286	22.9077	20.7679	NA	NA	NA	NA	NA	NA	NA	NA	NA
P70372	90	Elavl1	1	22.7177	22.2923	22.5434	22.4823	NA	NA	22.6947	22.3225	22.5091	22.2391	22.4953	22.1166	22.559	22.1721	NA	21.5114	22.2868	22.5062	22.5965	22.325	21.6599	23.044	NA	NA	22.8621	22.55	22.642	22.8386	21.6778	22.0863	22.5133	22.2654	NA	21.1064	22.3851	22.1886	21.8962	22.2871	22.7289	22.28	22.8051	NA	22.2908	22.6705	22.4438	22.0288
P62869	77	Elob	1	23.2376	23.1437	23.2348	23.5318	NA	NA	23.6488	23.361	23.0384	23.5676	22.8002	21.8724	22.8505	22.6215	23.0732	22.126	22.915	21.7475	22.0898	22.7604	22.6793	23.0762	NA	NA	23.2301	22.8849	22.0035	23.0368	23.2623	23.0251	23.4346	NA	23.8382	22.8982	23.3566	23.0313	22.8069	22.1443	22.1294	21.9593	NA	NA	22.6114	22.4936	22.0401	21.9736
P83940	53	Eloc	1	22.9618	21.9246	22.1879	22.5872	NA	NA	22.8861	22.2707	22.3091	NA	21.4232	21.7442	22.6136	22.1782	23.2462	20.7487	22.5124	20.9862	21.4982	22.8038	21.8286	22.9008	21.4202	23.478	21.7472	22.1386	22.2433	22.5692	21.1441	22.7422	21.5581	NA	23.072	22.7198	22.7634	21.8523	21.8011	22.0632	22.7787	22.2643	23.5422	23.8154	22.6643	24.3841	22.129	22.1153
P17182	567	Eno1	1	28.0427	26.029	26.662	26.7818	27.9844	NA	26.095	26.7432	26.6379	26.3482	25.949	26.3341	27.59	26.737	26.4066	26.0851	26.5687	26.5992	26.1437	27.3078	26.945	27.5302	28.002	28.1733	27.1499	26.908	26.1918	26.9035	26.1466	26.9907	26.4704	27.7194	27.6461	26.9494	27.0439	26.3873	26.293	25.6666	26.5969	26.6382	28.6491	26.5339	26.4318	26.4086	26.2257	26.1502
O70318	153	Epb41l2	1	22.6307	23.222	23.2453	22.6872	24.3876	NA	23.4378	22.7697	23.0342	23.3339	23.2046	22.8425	22.9036	24.3136	23.0945	23.108	23.2839	23.4724	23.6085	22.9353	22.8058	22.9579	23.142	23.1125	23.4106	23.0614	23.8292	23.0403	23.4982	22.569	23.3862	NA	NA	23.4558	23.1095	23.936	23.8094	22.6348	22.7733	22.6156	NA	23.1084	22.3533	22.7994	22.8977	23.3326
Q9D379	126	Ephx1	1	23.2898	22.6671	22.594	22.4951	22.8455	NA	23.1304	22.3295	22.9635	23.6108	23.1897	23.0242	23.2568	24.1613	24.1101	23.8154	23.9551	24.035	24.3366	23.7851	23.21	22.1948	NA	NA	21.9759	23.0963	23.6421	23.0105	23.3627	23.3073	23.7	23.2325	NA	22.8989	23.1902	23.864	23.768	23.1834	22.8968	22.7695	22.8504	24.4	23.4994	23.5236	23.8499	23.9904
Q8CGC7	327	Eprs1	1	23.3173	23.7555	23.7023	23.6734	23.6335	23.9565	23.4449	23.7123	23.7796	23.5019	23.4609	23.33	23.9233	23.932	23.7674	22.6549	23.1293	23.4064	23.1907	24.5046	23.6763	23.895	23.6475	24.4251	23.5901	23.3916	23.6419	23.7	23.7626	23.8283	23.7271	23.9665	24.1071	23.6152	23.5718	23.5893	23.4525	23.7645	23.0363	23.7265	24.2168	24.0578	23.585	23.3534	23.6721	23.8572
P84089	57	Erh	1	23.2714	23.2131	23.6336	23.3052	NA	NA	23.2028	22.8482	23.586	22.4526	23.1521	23.1613	22.8086	22.3795	NA	22.8635	22.7078	22.4661	22.7193	23.247	22.83	22.9047	NA	NA	23.3471	22.5659	21.8356	23.204	22.9438	22.6364	22.7528	NA	22.5851	22.8235	22.7161	23.1523	22.7855	23.5889	23.5307	23.3135	NA	NA	23.5404	23.093	22.3919	23.1995
Q8R180	64	Ero1a	1	21.4656	21.0181	21.4801	21.1797	NA	NA	21.0525	21.1164	20.5531	20.4474	20.5971	20.008	NA	NA	NA	21.496	21.4318	21.0202	21.4083	NA	NA	NA	NA	NA	NA	NA	NA	NA	20.7026	22.0305	21.6438	NA	NA	21.582	20.6449	20.5022	20.6224	NA	22.9745	NA	NA	22.5756	21.3988	23.0952	21.5137	21.2808
P57759	55	Erp29	1	21.922	22.1392	22.0805	22.3236	NA	NA	22.7164	21.3304	22.3174	22.2623	22.6089	22.1036	21.894	22.0206	21.9034	21.816	21.5941	21.9594	22.4197	23.1011	21.5567	22.649	NA	NA	22.5821	22.1577	22.4828	21.9089	22.8174	21.8042	21.5328	21.8374	NA	22.2484	21.9512	22.0961	23.1246	21.8777	22.6652	21.7615	NA	NA	21.3201	22.4634	21.3469	21.5912
Q9D1Q6	74	Erp44	1	22.7125	22.6237	22.4125	22.4497	NA	NA	23.1033	22.274	22.5095	23.0319	22.8075	23.0064	26.034	22.6217	23.397	24.059	23.2374	22.9412	23.0682	22.3512	22.8133	23.3442	23.479	NA	23.6983	22.5288	22.2576	22.3845	22.3135	22.9648	NA	NA	NA	22.0257	22.6574	22.2354	22.3557	22.2532	22.2309	22.6455	NA	22.9922	22.7696	23.0237	22.2559	22.404
Q9R0P3	90	Esd	1	23.5578	21.6206	21.6449	21.783	NA	NA	22.6564	22.9019	21.6053	22.6347	22.4984	22.6791	NA	NA	23.4215	23.9798	23.0705	22.6007	22.9969	23.3748	22.5724	22.5382	NA	NA	22.9836	22.488	22.7932	21.7124	21.2084	22.5252	23.3288	NA	NA	23.2689	22.7063	21.9443	22.7877	NA	NA	NA	NA	NA	NA	NA	21.9138	21.9208
Q3U7R1	139	Esyt1	1	22.1833	22.7257	22.4971	22.1419	NA	NA	22.3706	22.0588	22.815	22.7667	21.4193	22.5916	NA	22.3912	NA	22.7143	23.0381	21.5052	20.9102	24.0222	23.0299	23.7982	22.3716	NA	23.3459	23.324	22.733	22.3761	22.1119	22.6085	21.7971	22.0022	23.3978	22.4623	22.8684	21.3527	22.1993	21.7036	22.6512	22.4825	23.1274	NA	22.2262	21.8785	22.1684	21.8906
Q8BWY3	51	Etf1	1	21.5057	22.3196	22.207	22.4025	NA	NA	22.2716	22.3687	22.2699	22.2275	22.596	22.4762	NA	NA	NA	22.1472	NA	22.0513	NA	NA	23.473	23.0668	NA	NA	21.9426	21.8522	21.7938	21.6018	22.541	22.6832	22.5569	NA	NA	NA	21.7856	22.2552	21.9196	22.6007	22.2271	22.7849	NA	21.85	22.7678	22.3554	22.1741	22.6273
Q99LC5	214	Etfa	1	24.9026	24.5854	24.6358	24.7913	25.0518	23.8702	24.7837	24.802	24.4112	24.6121	23.9483	24.9319	24.812	24.4934	24.2088	24.5861	24.7948	24.0136	24.5306	24.2613	24.405	24.4359	23.989	25.0029	23.9442	24.5501	24.0936	23.9594	23.9083	24.4996	24.6041	24.8314	24.2984	24.2741	24.4232	24.1604	24.4216	24.1751	25.0134	24.2951	24.5514	23.8226	24.5376	24.8181	23.9721	24.5047
Q9DCW4	161	Etfb	1	23.4301	23.3518	22.9424	23.3365	NA	NA	23.7373	22.9594	23.3107	23.2637	22.3274	22.9293	NA	22.8749	NA	23.4498	23.0384	22.49	23.3905	23.7224	23.4263	23.4263	22.6386	NA	23.0538	23.1201	23.0817	23.3932	23.0945	23.1403	23.4999	23.1442	23.4133	23.4532	22.8704	22.8405	22.9991	23.1963	23.3079	23.3181	23.9217	NA	23.0503	23.0512	23.3432	23.1092
Q61545	35	Ewsr1	1	21.888	22.0527	22.0617	21.7144	NA	NA	22.4278	22.2663	22.2223	22.1674	22.4185	22.6484	NA	NA	NA	22.69	22.0183	22.5565	22.1764	NA	22.2209	22.63	22.5283	NA	22.8187	22.0422	22.2294	22.5862	22.6922	21.6927	22.7591	NA	NA	22.0827	22.4761	22.5285	21.9935	22.5295	22.4043	21.9955	NA	NA	22.7085	22.1892	23.0736	22.2764
P26040	496	Ezr	1	25.8032	25.7752	24.9546	24.6622	25.637	NA	24.3479	24.551	25.2423	25.1909	25.9132	26.8132	25.3475	25.6771	25.2095	25.1079	25.5726	25.5763	25.3353	24.7994	25.2474	25.4848	25.3222	24.602	25.3618	25.5971	25.6279	25.9982	25.3706	26.3016	25.6522	25.0979	25.3188	25.2944	25.7743	25.6861	25.734	26.3372	25.679	25.6863	24.9507	25.1249	25.3208	25.0931	26.1114	25.9694
O88792	77	F11r	1	22.8011	24.2268	22.0218	22.8328	NA	NA	23.5563	24.2465	21.3271	21.6115	23.6713	22.3224	23.0472	23.0946	NA	22.7538	21.43	22.1984	22.4449	24.0234	21.2816	21.3273	22.6601	NA	22.033	21.9584	21.1918	21.3284	22.0873	21.8591	22.1432	NA	NA	22.6853	22.0269	21.6319	22.0499	NA	22.5035	21.6872	NA	NA	22.3597	21.5197	21.97	21.9232
Q9WUA2	53	Farsb	1	21.2749	21.8661	21.5198	21.2437	NA	NA	21.9745	22.7896	22.3037	21.7211	21.211	21.5619	NA	NA	NA	22.0061	22.3706	21.3344	21.2341	NA	21.7983	21.1965	21.8115	22.8198	21.3385	21.8066	21.7845	21.5074	NA	21.5455	20.9832	NA	NA	21.726	21.4122	21.7265	21.5251	22.1601	21.5223	22.04	NA	22.6686	21.7619	22.0643	21.305	21.8052
P19096	218	Fasn	1	22.5226	22.5299	22.4695	22.6569	23.6584	NA	22.9334	22.6921	23.0061	22.0627	22.2761	22.3198	22.9298	23.2163	23.2655	22.7486	22.6596	22.113	22.3651	23.3094	22.3243	23.1594	22.9375	23.2362	22.6794	22.7596	22.1013	22.3248	22.3632	22.7096	22.4617	22.9311	NA	22.1408	22.4663	22.0005	22.408	22.0417	22.7685	22.3999	NA	23.1641	22.5184	22.4378	22.1525	21.9313
P62862	29	Fau	1	22.7264	23.7418	23.5918	23.9677	NA	NA	22.8853	23.9783	23.871	23.6579	24.3403	23.3719	22.7064	22.0635	NA	23.4656	23.1265	23.4113	24.1837	NA	23.1525	23.9396	22.8348	NA	23.6548	23.65	24.2482	23.9088	23.5818	23.2928	22.9361	NA	NA	23.5687	23.5912	24.2666	23.8856	23.8529	23.4701	24.3331	NA	NA	23.6802	23.4883	24.3685	23.8926
P35550	124	Fbl	1	23.2209	23.2586	23.0192	23.0071	23.7999	NA	22.9444	23.0891	22.663	23.1323	23.1711	23.4141	23.7599	22.4848	23.8618	22.9092	23.2231	23.0517	23.2043	23.1531	23.1849	22.141	22.2223	NA	21.8421	22.9858	22.728	22.998	23.0364	23.2716	22.6763	23.0311	23.0948	22.883	23.3583	23.5258	22.6918	23.1557	23.272	23.2825	NA	NA	22.5236	22.5597	22.5809	23.1117
Q920E5	140	Fdps	1	23.5819	22.5985	24.4978	23.282	24.9317	NA	23.7682	23.0675	22.54	21.7837	22.2174	23.3628	23.0647	22.7328	NA	22.7655	23.0347	21.7064	22.424	23.0079	22.9804	24.2981	23.0675	23.6318	24.0845	23.282	22.8687	22.6279	22.7413	24.625	23.3151	NA	23.3652	23.4191	23.387	22.2327	22.2221	23.1595	24.1182	23.9848	NA	23.89	23.3532	23.289	22.7998	23.1124
P97807	65	Fh	1	22.008	NA	21.6565	21.2713	NA	NA	NA	22.2972	21.4475	NA	21.4816	21.7279	21.7782	NA	NA	21.0974	21.599	21.7588	21.3166	22.5768	21.869	22.8975	22.6936	22.1965	22.8485	22.4771	21.1675	21.7405	NA	NA	NA	NA	NA	NA	NA	NA	NA	22.0457	NA	NA	NA	NA	NA	NA	21.998	22.5028
Q61576	248	Fkbp10	1	24.0259	22.7752	23.3175	22.4138	24.8234	NA	23.6941	24.8178	22.9794	22.4168	23.2995	22.7762	23.3046	23.303	NA	23.5787	22.5728	22.9758	22.5797	23.4107	22.5666	22.9015	23.828	NA	22.1439	22.922	22.7407	23.0922	23.1883	22.9691	23.6569	24.3795	24.3687	23.1883	23.1966	23.2004	23.3419	22.8463	22.3382	23.31	23.9187	NA	23.6208	23.2836	22.9357	23.3087
P26883	31	Fkbp1a	1	21.8049	NA	20.4861	20.5944	NA	NA	NA	20.3882	21.4032	20.0788	20.5957	21.3486	NA	21.3602	NA	NA	NA	NA	20.6647	21.7194	20.3695	21.3587	22.6093	22.3426	21.2595	20.7802	21.1564	21.0994	21.1753	20.0178	20.3238	NA	NA	20.5756	20.4481	20.4805	21.2657	22.6598	22.2687	NA	NA	NA	22.2537	NA	22.2717	21.9728
P45878	32	Fkbp2	1	21.8311	21.03	21.6592	21.5317	NA	NA	22.1415	22.9592	22.0154	20.2776	21.1425	21.4762	NA	NA	NA	21.6938	20.2155	21.1182	20.4677	22.4554	20.2006	22.0581	22.3354	NA	21.3058	22.0152	21.6995	21.7959	21.2663	21.2981	21.7817	NA	NA	21.7473	21.5324	21.9087	21.2665	21.7795	21.5684	22.0867	NA	NA	22.3934	22.1635	21.8855	21.7639
Q62446	30	Fkbp3	1	20.7583	22.7039	22.6673	NA	NA	NA	22.115	22.34	NA	NA	20.6666	21.14	NA	NA	NA	20.7231	21.2449	21.4438	21.7419	NA	20.2734	NA	NA	NA	21.4013	20.9379	21.408	22.4642	21.128	21.9771	21.5143	20.9676	21.9041	21.2283	21.5279	21.5642	21.9437	21.313	20.9578	21.6797	22.521	NA	21.9324	21.3328	21.2741	21.4268
P30416	112	Fkbp4	1	22.8421	22.8418	22.8247	23.3167	NA	NA	22.8474	22.6791	22.1517	22.6228	22.5215	23.3701	22.449	NA	NA	22.9745	23.2251	22.0767	22.0467	22.0643	23.6174	21.9807	22.8786	22.6587	22.5653	23.0581	22.7807	23.0923	23.0276	23.3549	22.9134	NA	22.5965	22.8076	23.0002	22.5934	22.3279	23.1327	23.3708	23.47	23.2291	23.2419	23.3164	23.2428	23.2598	22.92
O54998	60	Fkbp7	1	21.6497	19.7153	19.6053	20.0896	NA	NA	20.837	NA	18.77	19.5066	20.9148	20.5488	23.2393	NA	NA	21.8552	21.0764	20.5021	20.81	NA	21.8733	22.4286	NA	NA	21.269	20.8219	21.3119	NA	20.5214	20.8456	22.0115	NA	NA	20.5525	20.8747	19.9945	20.0718	20.5826	21.1833	22.509	NA	NA	22.6198	22.021	21.0551	20.8449
Q9Z247	70	Fkbp9	1	22.4776	22.0074	21.228	21.7412	NA	NA	22.1043	22.1389	20.4807	21.6833	21.8555	21.7244	23.7118	23.8505	23.0685	22.052	22.5024	22.3077	22.4097	22.356	21.7315	NA	NA	NA	21.0128	21.7035	21.9451	21.712	21.5287	21.9919	22.1942	NA	NA	21.9476	21.4172	21.6492	21.0934	21.9525	21.5953	22.3702	NA	NA	22.222	22.4839	22.1419	21.9566
Q8BTM8	1634	Flna	1	25.891	26.1567	25.8178	25.7545	25.6787	25.9332	25.0244	26.1246	25.823	26.4903	27.0949	25.7493	25.3097	25.9894	25.6068	25.8824	25.5752	26.7151	26.2198	25.2108	25.2586	25.3342	25.8898	25.8933	25.8775	25.3925	26.5666	25.9318	26.7808	25.9468	25.733	25.3957	25.6656	25.7941	26.391	26.5853	26.9847	26.3571	25.5858	25.4058	25.0396	24.8981	25.5155	25.6969	26.4137	26.8263
Q80X90	998	Flnb	1	24.4042	23.7995	24.2985	24.399	24.9174	NA	23.7597	24.5048	24.2583	24.2148	24.0072	24.2024	24.3278	23.9383	23.9837	24.2983	24.0443	23.992	23.9225	23.6794	24.2054	24.3604	24.2831	24.6678	24.366	24.3639	24.0004	23.9857	24.0591	24.3039	24.3384	24.5885	24.4176	24.162	24.7866	23.9556	23.9613	24.4061	24.0551	24.2117	24.3678	24.3517	23.6837	24.4594	24.0659	24.1656
Q8VHX6	333	Flnc	1	23.292	23.1519	22.7467	23.4768	24.0619	23.4394	23.2046	23.5319	23.3373	23.9095	24.0583	24.4361	23.8113	24.0212	22.2056	24.1799	23.6089	23.4458	23.3902	22.943	23.4682	23.4158	24.4652	23.4675	23.6207	23.7852	23.7256	23.97	23.6892	24.233	23.8422	25.0015	24.026	23.8989	23.5244	23.4246	23.7435	25.063	23.8159	24.0405	23.5061	23.3176	23.7182	23.709	24.2736	24.4845
P11276	1226	Fn1	1	25.0712	24.7665	25.5913	24.7768	25.4038	25.1117	25.6906	24.8929	24.3268	24.2702	25.9094	24.9227	25.2171	25.4448	25.1733	24.5641	24.564	24.5718	25.1972	25.2182	25.8458	24.8224	25.07	25.2694	25.2708	25.3886	25.9881	24.7125	25.6467	25.7755	26.3849	25.5133	25.3528	25.9867	24.9956	26.1432	25.9813	25.0907	24.1466	25.1701	26.1745	24.7131	24.8699	24.7711	26.3477	25.3097
Q61553	514	Fscn1	1	25.7017	24.66	24.474	24.7577	NA	26.5926	24.8697	24.6939	24.5705	24.4848	25.0905	24.403	25.9028	25.4216	25.3624	24.0165	24.5887	24.738	24.2743	24.3953	23.7161	24.8056	24.4622	24.8907	24.4581	24.2825	24.8213	24.3516	24.7304	24.1023	24.1702	25.2681	25.4003	24.4583	24.3282	24.5352	24.5235	24.5254	24.4729	24.301	25.0531	25.1225	24.1975	24.9872	24.8243	24.8263
Q91WJ8	81	Fubp1	1	21.8892	22.3449	22.227	22.8479	22.9603	NA	21.9166	22.3665	22.2878	22.0921	21.8778	21.5828	21.3433	21.6996	NA	22.1698	22.2228	21.4245	21.7668	NA	22.305	22.2528	NA	NA	21.7315	22.5811	21.9608	22.65	22.7822	21.472	21.6912	NA	NA	21.3914	21.7488	21.9199	21.1927	21.7286	22.337	21.7555	NA	NA	22.5081	21.6342	21.4267	21.0991
P56959	90	Fus	1	24.1541	24.6136	24.3119	24.1471	23.5528	NA	23.1337	24.3725	24.4984	24.3636	24.5306	24.3937	24.0502	23.6949	NA	23.9885	24.2714	24.45	24.7388	22.8636	23.6478	23.3699	23.5342	NA	23.6141	24.1004	24.1268	24.4076	23.7538	23.9261	23.8411	23.2052	23.3518	24.4095	24.7037	24.4419	24.1846	24.3241	24.3507	23.9803	NA	NA	23.9083	23.7975	24.6003	24.1334
P11370	25	Fv4	1	21.0235	21.6825	20.1349	21.7753	NA	NA	NA	20.6567	21.5518	22.0482	21.6175	20.4869	NA	22.3719	NA	22.4196	20.9547	21.6056	21.9036	21.4548	20.7238	20.1331	NA	NA	21.237	22.1553	21.407	21.3137	22.8712	NA	21.4725	NA	NA	NA	21.6371	22.7825	22.4606	23.0483	21.1795	21.8776	NA	NA	NA	NA	21.5662	22.1332
Q61584	53	Fxr1	1	21.6426	23.5267	23.2151	23.2393	NA	NA	23.2912	23.5815	NA	NA	22.0633	22.1893	22.1481	21.1951	NA	21.8268	22.115	21.7866	22.1414	22.684	NA	22.9807	22.4627	NA	23.1656	22.1577	22.139	22.8374	21.7964	21.9021	20.7087	21.8195	NA	21.693	21.5446	20.9903	21.0799	22.3913	22.7048	22.5343	22.2536	22.7036	22.0386	22.5806	22.3357	22.1461
P97855	60	G3bp1	1	22.4305	22.6115	22.7365	22.5255	NA	NA	22.295	22.5971	22.3643	23.0648	23.1518	23.1909	22.4867	22.5753	NA	22.2708	22.2282	23.0508	23.3821	NA	22.1984	22.6039	NA	NA	22.2536	22.5564	22.6507	22.8982	22.7224	22.3332	22.4597	NA	NA	22.383	22.441	23.0223	22.47	23.7114	23.4652	22.762	NA	NA	22.2005	22.1311	22.9841	23.3807
P97379	47	G3bp2	1	21.5241	21.8856	21.7842	22.2201	NA	NA	21.4433	22.205	22.0119	20.7783	20.8806	20.1874	NA	NA	NA	22.5597	22.8572	21.0001	20.7362	22.2614	21.3076	22.702	NA	NA	22.1931	22.0435	21.0417	21.3327	21.69	22.3597	21.9175	NA	NA	21.6283	22.2991	21.1922	21.5454	21.371	22.7338	21.8705	NA	NA	21.7083	21.9778	21.9632	20.9582
Q00612	83	G6pdx	1	22.3794	22.2986	21.8531	22.4981	NA	NA	21.9358	21.7135	21.8828	21.8628	21.7394	21.9817	22.4871	22.3396	22.937	22.2635	22.4917	22.0888	22.2207	22.3825	22.157	21.8378	22.5719	22.3271	22.0962	21.7222	21.9795	22.2745	23.2712	22.3033	23.7095	NA	22.7279	23.3625	22.3448	22.648	22.5181	22.835	21.8296	23.1515	NA	24.0417	22.9472	22.3589	22.8087	22.2667
P70699	83	Gaa	1	22.2451	NA	22.0422	NA	NA	NA	23.5666	23.1166	22.8465	NA	21.8631	22.2159	22.8994	NA	NA	23.053	23.8246	22.4533	23.2367	22.8884	22.9672	NA	NA	NA	22.3357	23.7916	22.5224	23.057	22.8606	22.7299	23.0113	23.5308	NA	23.5154	23.0394	22.9164	22.3695	23.1374	21.7756	22.5791	22.8398	22.8128	23.3166	23.1768	22.811	22.5305
Q9R0N0	40	Galk1	1	21.2595	20.7467	20.1755	20.6382	NA	NA	20.6985	20.6894	21.0147	20.9346	20.4637	21.3274	NA	20.7424	NA	20.7809	21.0478	20.3423	20.9154	19.9957	20.5638	21.1242	20.4472	NA	20.346	20.8514	20.6255	20.9286	20.5962	19.833	20.6015	NA	NA	20.3131	20.2148	20.3969	20.3159	19.8633	20.6584	19.2879	NA	NA	20.3584	19.7179	20.5977	20.2635
Q8BHN3	411	Ganab	1	24.511	23.3571	23.7282	23.75	NA	NA	24.1321	23.8514	23.6858	23.8456	23.5542	23.5312	24.1481	23.8686	24.3273	23.6343	23.9226	23.5363	23.2059	24.3872	24.024	23.7778	23.6064	24.7096	24.0185	23.9612	23.9779	23.9949	23.9185	23.1999	24.0914	24.1015	24.7961	23.893	23.2744	23.4185	23.7783	23.6815	23.436	23.3734	24.1295	24.8169	23.3956	23.3083	23.7556	23.1305
P16858	592	Gapdh	1	28.1497	28.0577	27.9248	28.8567	28.1597	27.3261	27.2094	28.1972	28.2313	27.9879	27.8005	28.1844	27.6003	27.3782	26.3557	27.8607	27.3306	27.9638	28.4735	26.6558	28.6202	27.9092	27.5526	26.8558	28.443	28.3629	28.1456	28.2725	27.7968	28.2464	27.888	27.1293	26.9832	27.8364	28.7173	28.4798	27.5653	28.5659	28.1652	28.1451	27.0043	27.2653	28.4033	28.1019	28.4203	27.9183
Q9CZD3	201	Gars1	1	23.1809	23.9836	23.0741	23.3798	NA	NA	22.6761	23.5733	23.1299	23.4297	24.4098	24.094	22.988	23.8778	NA	23.4853	23.4333	23.9393	23.8837	23.0498	23.7819	23.6006	23.5419	24.0429	23.6437	23.7811	23.9083	23.6323	23.8953	23.795	23.3961	23.9465	24.5398	23.77	23.3928	24.1288	24.4841	24.379	23.7799	23.4804	23.2113	NA	23.7941	22.8058	23.9166	23.9772
Q61107	49	Gbp3	1	21.7772	22.2321	22.0483	21.9991	NA	NA	21.7997	20.881	21.4034	22.2435	21.2758	21.5482	21.6701	22.3538	22.0379	22.4116	22.2692	21.6649	23.0506	NA	21.8869	22.923	NA	NA	22.0111	22.4416	21.5913	21.5911	NA	22.7457	23.3642	22.9117	22.887	22.9087	21.7905	21.278	21.6924	21.7712	21.5984	21.8539	NA	NA	22.0143	22.9472	20.9942	21.9986
E9PVA8	39	Gcn1	1	20.3463	21.6791	21.3392	21.6646	NA	NA	21.4591	22.1711	21.6984	21.7408	21.6594	21.3888	20.7079	21.2028	NA	21.7119	21.9182	22.0192	21.8793	20.9174	20.7764	22.1879	22.0694	21.66	21.8112	20.9948	21.1937	21.0994	21.7773	21.5918	22.03	NA	NA	21.9838	20.8346	21.4084	20.8624	21.8447	21.5979	21.7319	21.8237	21.2208	21.8344	21.3326	21.4626	21.8037
P50396	103	Gdi1	1	23.2612	22.421	22.2681	23.3646	23.1072	NA	25.1384	22.9822	22.3747	22.3321	22.6544	21.8737	NA	NA	NA	21.0551	22.1572	21.8374	21.4629	21.7158	22.452	23.2261	23.2307	23.1492	24.219	22.9887	23.0539	22.781	22.7925	23.052	23.317	24.2035	22.8789	25.208	23.3784	23.601	22.6624	22.7048	22.866	NA	NA	NA	23.5413	22.5857	22.335	21.7906
Q61598	331	Gdi2	1	24.3277	23.7204	23.475	23.8121	NA	NA	23.4864	23.618	23.4716	23.8261	23.6437	24.0717	24.1023	23.8244	23.9531	23.9356	24.0709	23.4552	24.1026	24.2304	23.8129	23.8943	23.446	NA	23.3147	23.6142	23.3146	23.606	23.668	24.2144	24.0941	24.1742	24.7534	23.7472	24.1032	23.8467	24.061	23.3503	23.4221	23.2179	24.4653	NA	23.2427	23.6417	23.2357	23.7156
P47856	63	Gfpt1	1	21.6383	22.4371	21.991	21.9984	NA	NA	21.2615	22.3213	21.9779	22.2993	22.5559	22.5354	21.959	22.5449	NA	22.2557	20.9967	21.7139	22.324	22.0668	22.1093	21.607	NA	NA	22.0912	22.6669	22.0309	21.7593	22.2889	22.1282	22.2054	NA	NA	22.9016	21.7868	22.0012	22.5067	22.3543	22.2172	22.2398	NA	NA	21.8342	21.4449	22.0256	22.1617
Q9CYL5	41	Glipr2	1	21.9224	21.418	22.1206	21.4096	NA	NA	21.7743	21.1847	21.589	21.6902	22.4049	21.916	NA	NA	NA	NA	NA	22.282	21.8856	NA	22.0362	21.3257	NA	NA	21.4824	21.8499	22.3279	NA	21.8111	20.899	21.02	21.9199	NA	21.3299	21.5014	21.8016	21.7916	21.5718	21.3171	21.4246	NA	NA	20.9362	21.0912	21.9187	21.929
Q9CPU0	139	Glo1	1	23.9436	23.1016	22.7505	23.0697	23.2049	23.4353	22.7206	23.2657	22.6272	23.2957	22.022	22.1971	23.2857	22.6523	23.6785	22.0143	22.6346	22.5808	22.3013	23.6928	22.6959	23.0914	22.2493	23.5399	23.029	23.142	22.9673	22.4193	23.1142	22.6157	23.3518	23.8708	24.0577	23.0458	23.7311	22.8445	22.3321	23.2185	22.9468	22.9366	24.0167	23.5925	23.5204	22.7488	23.2055	23.4641
Q9CPV4	42	Glod4	1	21.4159	21.9863	21.7524	22.1219	NA	22.3603	21.6417	21.2059	21.4595	21.7667	21.0907	21.4467	NA	NA	NA	21.9279	21.5927	20.808	NA	21.9373	20.7934	21.5563	22.2847	NA	21.7791	20.7979	21.8364	21.882	21.2455	NA	20.7118	NA	NA	NA	21.1616	21.3391	21.4748	20.9374	20.6071	19.9228	20.4508	NA	20.6167	20.9581	21.1335	20.8365
Q9CQM9	35	Glrx3	1	20.8603	20.6418	20.4945	20.8943	NA	NA	21.9631	21.1321	20.9876	20.9207	22.204	21.0774	21.3363	21.36	21.353	22.2386	21.7119	21.1164	21.258	23.7319	21.4345	22.6664	NA	21.5496	22.4583	22.1252	21.7609	21.6489	20.238	20.1792	19.3402	NA	NA	20.3571	20.4707	20.8237	20.9459	22.8095	21.4088	22.5109	NA	21.136	22.2117	21.7402	21.8891	21.7404
D3Z7P3	49	Gls	1	21.3841	NA	21.5694	21.8133	NA	NA	21.6097	21.4596	21.9873	20.7531	21.4919	21.8503	NA	NA	NA	23.3309	NA	21.3487	21.9672	NA	NA	NA	NA	NA	21.6374	21.1433	21.1103	20.8792	21.1314	20.7028	22.2482	NA	NA	21.7519	21.4518	20.9306	21.395	21.6812	21.417	21.8194	NA	NA	21.4044	21.2739	21.6528	21.9077
P26443	200	Glud1	1	23.3605	22.8404	22.5264	22.7784	23.976	23.8999	22.8165	22.6117	23.0544	22.9784	22.2438	22.0153	23.3605	22.7808	NA	22.0191	22.6154	22.4325	22.1546	23.3676	23.0097	23.2293	23.1284	NA	22.5825	23.2489	22.7149	22.9944	22.5609	22.4558	22.6483	NA	NA	22.4804	22.4208	22.5368	22.8194	23.0627	22.6415	22.7583	23.165	22.9315	22.6868	22.9945	22.6663	23.0398
Q3THK7	32	Gmps	1	20.2006	21.1729	20.3735	21.3035	NA	NA	21.352	20.4282	21.2633	NA	20.7067	21.0276	NA	NA	NA	20.7886	19.9879	20.4274	19.7313	NA	NA	NA	NA	NA	NA	NA	NA	NA	NA	NA	NA	NA	NA	NA	NA	NA	NA	20.9437	20.6456	20.9335	NA	20.8437	20.5707	20.0611	20.4568	19.9453
P08752	119	Gnai2	1	23.7968	23.4975	23.8653	23.0843	NA	NA	22.8822	23.1802	23.0848	24.1131	22.7854	22.8342	22.6826	22.015	NA	22.7966	23.3651	23.5939	23.3251	24.0471	23.3375	23.3233	23.474	24.0199	23.1062	23.6113	22.2655	23.0772	23.4943	22.4413	22.8683	23.2694	NA	24.3555	23.3763	22.1552	21.91	22.6038	22.7498	23.6134	NA	23.6561	24.077	23.4046	23.3443	22.9024
Q6R0H7	47	Gnas	1	21.8713	22.2223	21.9406	22.9751	NA	NA	22.6419	22.5328	22.6404	22.3993	21.4553	22.6829	NA	21.4053	NA	21.6395	22.5756	22.6739	22.6047	21.9746	22.8166	23.1522	NA	22.771	22.7653	22.5513	22.4158	22.5028	22.3127	22.1831	21.9499	NA	NA	21.5534	21.8631	22.263	22.3916	21.9122	21.7594	21.1669	NA	NA	21.7675	21.7029	21.1432	22.3833
P62874	57	Gnb1	1	22.5561	21.7741	21.8985	21.8397	NA	NA	21.5312	21.3421	21.8742	20.5456	22.1705	22.6458	22.581	22.318	22.4844	22.4727	23.4003	22.2039	22.7827	21.9953	21.3804	21.9975	22.5723	NA	21.1704	21.7581	22.2787	21.708	22.0309	22.1901	22.0317	NA	22.4141	22.4062	22.1358	22.3355	22.2416	21.9996	22.4017	21.8692	NA	NA	21.8264	21.9209	22.2068	21.7502
P62880	107	Gnb2	1	23.4501	22.9473	22.2759	22.2061	NA	23.4419	22.3064	22.2322	22.5466	22.1906	22.4619	22.5576	23.5236	22.4495	NA	22.5434	22.9666	22.9919	22.3302	23.0238	22.3874	22.4757	23.3504	NA	22.181	22.4244	21.8881	22.2195	22.7805	23.2628	22.5468	23.0087	23.9398	23.2872	23.124	22.7641	22.9484	22.932	22.5824	22.3242	NA	NA	22.5082	22.6121	22.379	22.8396
Q80SZ7	44	Gng5	1	22.4899	21.9148	21.7282	21.6715	NA	NA	22.0902	21.6789	22.4936	22.3606	23.6621	22.7239	NA	22.2321	NA	22.3117	22.2604	23.4356	22.9509	22.1226	22.3883	22.0897	22.0792	21.8679	22.2066	21.7404	22.3542	22.6708	22.3111	21.4347	21.8976	21.5543	NA	21.5441	21.3659	21.9827	21.5745	22.3589	21.6355	22.0396	21.7248	22.2081	21.8316	22.1283	22.3997	22.8252
Q8BFR4	53	Gns	1	22.2587	22.101	22.088	23.1292	NA	NA	22.0013	21.944	21.3731	21.5779	21.1263	21.8498	23.5318	22.2693	NA	21.8924	21.7988	21.2415	21.7151	22.0397	21.8556	21.369	NA	NA	21.4822	21.7318	20.72	20.5696	21.5796	20.5692	22.0024	NA	22.0614	21.3553	21.0593	21.2772	21.3182	21.9124	22.3245	23.4964	22.6017	NA	22.3833	21.7231	21.5535	22.3252
Q99JX3	25	Gorasp2	1	20.2585	20.882	20.6041	20.6647	NA	NA	21.3436	21.3852	21.1372	19.7804	20.8609	20.793	NA	22.665	21.9413	21.7966	21.7651	21.1504	NA	NA	NA	NA	NA	NA	NA	21.9573	21.6292	21.1392	20.9558	NA	22.1655	NA	NA	21.4257	22.0517	NA	NA	21.2326	20.9362	20.8686	NA	NA	21.4595	NA	21.5638	20.7763
P05202	233	Got2	1	24.3833	23.1537	22.7682	23.1785	24.9393	NA	23.6055	23.58	23.0273	23.3208	23.1563	23.3604	24.3863	23.5038	23.8439	23.1898	23.4253	23.716	23.4491	24.7199	22.0923	22.828	22.6151	23.4704	22.7747	22.5569	23.1581	23.1649	23.4067	22.659	22.7493	24.3927	24.0157	23.8032	23.5637	22.8756	23.0494	22.6587	23.1547	23.4664	NA	NA	23.2985	23.6737	23.2652	23.5612
P06745	233	Gpi	1	24.38	23.7421	22.576	23.3787	24.9325	NA	23.3686	23.6089	23.6374	22.2608	23.3032	22.9551	25.4124	23.7117	23.761	23.4994	22.7692	23.244	21.9333	23.7084	23.4258	23.2806	24.2569	24.8581	23.3317	23.4393	23.3671	23.5757	22.9491	22.9638	24.0652	NA	24.8804	23.893	23.5414	23.1739	22.86	23.0921	22.9933	22.8372	NA	NA	23.792	23.5029	23.2939	23.0864
P11352	65	Gpx1	1	22.4017	23.5494	22.6351	23.035	NA	NA	23.852	22.675	22.7134	22.2911	21.9358	21.5645	NA	NA	23.0774	22.7645	22.4656	21.7347	21.7212	21.4273	21.5949	21.6955	NA	22.4843	22.0449	22.4529	21.2438	20.9628	22.0648	22.4027	23.4526	NA	22.7807	23.1957	23.1779	NA	21.3197	22.3162	22.3273	22.9022	NA	23.1466	22.2932	22.7866	22.0145	21.6908
P28798	88	Grn	1	23.6429	22.4609	22.7942	23.0293	NA	NA	23.0023	23.0073	22.8381	22.3663	21.7252	21.6144	23.5033	23.2334	NA	22.1208	22.8943	21.7739	23.6826	24.6445	22.5185	23.8687	23.4074	24.1808	23.642	22.6343	22.3688	24.4661	22.4051	24.0277	22.4395	22.7906	NA	22.7855	22.2321	21.7904	22.0342	NA	21.7399	21.7332	NA	NA	22.0714	22.75	21.7886	21.7225
Q99LP6	67	Grpel1	1	22.568	21.5354	21.7685	NA	NA	NA	22.9676	22.0348	22.1784	22.0339	21.7977	22.3087	NA	22.6399	NA	21.8251	22.0041	21.5603	22.0238	22.2397	22.392	22.208	NA	NA	22.8626	21.7435	21.3631	21.7823	21.9787	21.7646	21.9017	22.0421	NA	22.9053	21.6342	21.5085	22.4336	21.3524	22.0059	21.5715	22.1655	NA	22.3387	22.4777	21.1943	21.3381
Q9EST1	19	Gsdma	1	20.6232	21.2766	21.2202	20.0852	20.6838	NA	19.9677	20.6251	22.0037	21.8797	22.2999	21.5918	20.2339	20.5577	NA	20.952	20.6635	22.1675	22.1322	NA	20.7707	20.9006	21.0025	NA	20.0786	21.0808	21.5673	21.4608	21.6577	20.4408	20.742	NA	NA	20.2839	19.5662	21.7107	21.2443	22.0113	20.4982	21.0237	NA	20.2408	20.7567	21.2485	22.2165	22.8505
P13020	478	Gsn	1	25.0507	24.7627	24.6361	23.9265	24.8548	NA	24.3888	24.3699	24.2099	24.6343	25.009	24.435	24.3784	24.4798	25.4008	24.3751	24.7688	24.5605	24.525	24.4477	24.2704	23.9755	24.7629	25.5178	24.5701	24.1826	24.7007	24.2747	25.0673	24.5113	25.0714	25.0531	24.734	24.7851	24.9979	24.9555	25.4627	24.5232	24.2771	24.2835	25.1801	25.2533	23.9608	24.5687	24.7017	24.8674
Q8R050	54	Gspt1	1	21.6086	22.3166	21.9982	22.7682	NA	NA	22.0308	22.2261	21.9944	21.5262	22.2003	21.6631	NA	NA	NA	21.1039	21.9535	21.6628	22.0947	22.5501	22.1343	22.3677	22.9361	NA	22.5465	22.1639	22.6169	22.502	22.1901	22.4437	22.1973	22.051	NA	21.924	22.0738	22.4741	21.9738	21.4804	21.6381	22.5428	NA	NA	21.5791	21.6927	21.8984	22.0725
P24472	53	Gsta4	1	22.1847	22.7265	21.0069	20.4947	22.3674	NA	20.8183	22.1507	22.3765	23.3889	23.9803	23.8944	23.9166	24.1243	23.7483	22.3758	23.4212	24.5703	24.71	NA	22.1406	21.6878	22.1814	NA	21.2947	21.9636	23.0977	23.8538	23.3735	22.5717	22.8987	21.7878	NA	22.5793	22.0664	24.0827	24.0683	22.6469	22.1058	20.4659	NA	NA	22.0614	21.9874	24.0308	23.3951
P10649	73	Gstm1	1	22.6878	23.3416	22.6524	22.1931	NA	NA	22.638	22.8178	22.8344	23.0022	22.5047	21.7536	22.8319	23.901	NA	22.2575	22.1905	21.648	22.0071	22.3364	22.3501	21.4054	21.1889	22.1595	21.4945	21.7577	21.9732	20.8024	23.4792	23.0771	22.5657	23.0429	NA	22.4314	23.0693	23.0282	22.9299	22.7092	22.1946	22.8321	NA	22.5798	22.388	23.1022	22.9451	22.5998
P15626	119	Gstm2	1	23.8208	22.8637	22.697	22.7999	NA	NA	23.8507	22.8546	23.167	22.5805	22.6964	22.9102	24.1029	22.5459	23.8065	22.7564	23.5692	23.6165	22.8855	22.2248	21.7965	22.5544	23.5759	23.5353	22.7568	22.4868	22.7439	22.2691	23.0593	22.8834	22.338	NA	23.7437	23.128	22.5706	22.9425	22.9402	23.0259	23.1689	23.9742	23.2042	23.4437	23.3062	23.8186	23.6254	24.0734
P19157	147	Gstp1	1	25.0217	25.4051	23.4431	23.2673	NA	NA	23.2657	24.3916	24.0021	24.2703	23.7074	23.8743	23.9621	23.2683	24.6455	23.6129	24.1926	23.7257	22.9492	23.4249	23.8555	23.7427	23.9358	25.1749	24.1099	23.7884	23.8594	23.7118	23.833	23.8882	23.832	24.226	NA	23.9316	23.7064	23.7346	23.7232	23.7877	22.6179	23.4629	NA	NA	23.728	23.5895	23.4588	23.8993
P10922	131	H1-0	1	24.6102	23.6978	24.8713	24.0718	24.3411	NA	24.698	24.248	24.0209	24.41	23.4762	23.956	24.0304	23.809	24.0499	23.4248	24.2832	23.3757	23.3685	23.3429	24.7996	25.0254	24.6118	24.4145	25.1239	24.4125	23.9217	24.0278	24.2757	24.817	24.5347	24.3537	25.2313	24.2069	23.5868	24.2548	24.3108	23.9475	24.5187	24.8379	NA	23.8919	24.1026	23.9666	23.8534	23.6095
P15864	175	H1-2	1	26.7598	26.2428	26.7248	26.648	26.7105	NA	26.1687	27.1039	26.1421	27.5213	26.3396	26.6236	25.781	26.5163	26.3558	27.2848	27.16	26.2745	26.637	25.5813	26.3527	26.3121	26.0569	25.6797	26.9449	26.7104	25.662	26.6245	26.6413	27.5488	27.1565	26.4136	25.6373	27.2495	27.3611	26.8033	26.9426	25.9551	27.2825	26.9521	26.4375	25.6184	26.2984	27.1439	25.8914	25.4352
P43277	72	H1-3	1	25.1987	26.4255	26.1343	26.1664	25.0344	26.1248	24.9761	26.4336	26.0874	26.6185	25.5509	26.1104	24.2453	25.1541	24.4253	25.7986	26.1298	26.2042	25.8232	25.0545	25.0081	25.2295	24.5764	26.493	26.245	25.3319	26.0018	26.0909	25.414	26.4815	25.706	25.308	NA	25.1998	25.347	25.9401	25.8362	25.4831	26.3824	25.3747	25.3285	26.3731	25.3587	25.7054	25.0303	24.9595
P43274	159	H1-4	1	27.1218	26.3316	26.9751	26.795	25.7945	26.0744	26.1683	26.4333	26.2014	26.7335	26.5203	27.3678	25.9533	26.2409	25.6912	26.6276	26.8383	26.394	27.1719	25.4769	26.9709	26.6765	26.4594	26.186	26.6972	26.0824	26.2931	26.4624	27.1699	27.9707	27.1115	26.5622	26.1279	27.4502	27.3348	27.1498	27.4723	26.2447	27.542	27.6909	26.639	26.3024	26.38	26.624	26.195	26.4235
P43276	212	H1-5	1	27.1871	27.5006	27.5688	27.3361	26.3652	26.1841	26.6484	27.6179	27.1014	27.5317	26.8833	26.9654	25.8005	26.7042	26.6692	27.4942	27.7188	27.1582	27.2253	25.5206	26.7108	27.2471	26.8418	25.9037	27.4342	26.9667	26.73	27.1506	27.1202	28.0516	27.2679	26.6681	25.2305	26.9083	27.5678	27.078	27.5287	26.8573	27.9277	27.7943	26.4985	26.0292	27.2235	27.1393	26.5481	26.2697
Q64523	180	H2ac20	1	29.3976	29.3733	30.6276	29.9799	28.9605	28.5887	30.3886	29.8135	29.4797	29.6872	29.2352	29.5637	28.351	28.7934	27.6892	29.9042	29.8428	29.5046	29.5888	29.5815	29.1297	29.4533	28.1731	28.0116	29.7854	29.3825	29.1698	29.5974	28.71	30.2231	29.3294	28.8803	28.3149	28.9613	29.6449	30.1582	29.4696	28.7269	29.8864	29.1157	28.8705	27.8842	28.9414	29.6621	29.8183	29.1588
C0HKE1	20	H2ac4	1	24.8495	21.8863	23.6995	22.3423	23.3602	NA	23.2835	22.3117	22.4949	22.3418	22.4196	23.32	22.2846	23.9872	22.2967	22.8026	22.8711	22.6484	23.0343	23.4283	22.5831	21.9508	22.569	NA	22.2963	22.3882	21.8568	21.8808	22.7561	23.452	22.4358	24.1432	22.3474	22.6765	23.0879	23.2439	22.8788	NA	NA	NA	NA	NA	NA	NA	NA	NA
P27661	78	H2ax	1	26.4044	27.7037	28.5661	28.0719	27.5818	26.5304	28.1392	27.9832	28.0339	28.3271	27.3244	27.8528	27.3468	27.1612	26.5341	27.913	27.9348	27.7594	28.0526	27.6407	28.0826	27.4134	26.9948	25.4543	27.1653	27.2524	26.2636	27.6068	26.4436	27.5565	26.945	26.3608	26.4149	26.8815	26.8406	26.6719	26.5072	26.5145	27.6397	26.9873	26.2175	26.7967	26.3916	26.8795	26.944	26.34
P0C0S6	38	H2az1	1	23.8436	24.7541	25.5815	24.7578	24.964	23.4031	24.5681	24.7554	24.6248	24.5123	23.7136	23.6181	NA	23.706	23.8943	23.4117	24.2231	23.9276	24.1676	24.5798	24.4726	24.4514	23.5277	NA	23.5011	23.988	23.9593	24.3679	23.7788	24.2496	24.0938	23.654	NA	23.7667	24.6822	24.7434	24.0806	24.2537	24.1125	24.3718	24.0545	22.5015	24.2946	24.6447	24.2887	24.1606
P10854	361	H2bc14	1	30.2061	29.9708	31.0938	30.0793	29.9103	29.0323	30.4387	30.308	30.1471	29.7175	29.7031	30.3525	28.0366	29.4164	28.143	29.9854	29.8622	29.9317	29.987	29.9128	29.7514	29.9267	29.4632	28.6819	29.528	29.7456	29.4663	29.4869	29.7256	30.1726	29.6922	30.0866	28.4578	29.3652	29.861	30.3933	29.8087	29.5901	30.6534	30.2589	30.1631	28.7755	30.179	29.9726	30.128	29.6174
P14426	86	H2-D1	1	24.1723	22.5816	24.0186	23.4798	24.181	NA	23.5789	23.7078	23.1738	23.1092	22.0909	23.3955	23.2048	NA	23.1265	23.3768	22.4501	22.6724	22.245	23.366	23.8227	23.8422	23.1025	23.6327	23.61	23.4107	22.8289	22.761	22.9907	22.5077	23.1249	23.1203	23.2779	22.8405	23.6056	22.5564	22.2752	21.7642	23.768	24.1926	NA	NA	23.0185	22.6602	21.7743	23.1162
P04223	294	H2-K1	1	25.5613	24.5172	25.0434	24.292	24.6237	NA	25.2367	24.4971	22.9052	23.1042	23.8935	25.1275	25.0851	24.4264	24.8202	25.0685	24.6948	25.2022	25.1912	25.9251	25.5319	25.4049	24.8548	25.4112	25.686	25.3474	24.1989	25.588	24.7614	24.5876	25.1416	26.1334	25.7135	25.0011	25.338	23.9794	24.3335	24.3898	25.1104	25.1067	25.2636	25.6037	24.5892	24.4192	24.0634	23.4278
P02301	28	H3-5	1	21.5362	21.9187	23.3851	22.257	NA	23.5684	22.4407	21.5644	22.0874	21.0942	NA	NA	NA	NA	NA	NA	NA	NA	NA	22.8495	22.1228	22.0996	21.7548	NA	22.1818	23.0087	21.5834	22.4452	NA	NA	NA	NA	NA	NA	NA	NA	NA	NA	NA	NA	NA	NA	NA	NA	NA	NA
P84228	168	H3c2	1	29.8741	30.4893	31.8138	30.1742	30.0259	28.8424	30.8341	30.3208	30.3836	30.251	29.4628	30.0962	27.8399	28.9326	27.7162	30.1257	30.4329	29.8716	29.6537	29.8885	30.4968	29.7062	30.0851	28.6116	29.7913	29.8877	29.2421	29.2583	29.6311	31.421	30.6293	29.9622	28.4758	30.0246	30.287	30.6837	29.8779	29.3863	31.5618	30.984	30.217	28.4014	30.2121	30.3292	29.5555	29.66
P62806	245	H4c1	1	29.8162	30.231	31.4944	29.9032	29.1102	28.6895	30.4712	30.007	29.9397	30.085	29.7603	30.4117	27.664	29.1018	27.4975	30.0499	30.1427	29.8002	29.8656	30.4706	30.797	29.7819	30.0494	28.2739	30.2202	29.8189	29.5689	29.985	30.4643	31.1939	30.2409	29.6338	28.1021	29.8036	30.1337	30.6945	30.3889	30.0396	31.4105	30.6672	30.0731	28.5196	29.9679	30.0265	30.0903	29.7251
Q61425	30	Hadh	1	20.3095	20.2765	19.1282	19.6161	NA	NA	NA	20.8367	NA	20.1637	20.3614	20.6713	20.2993	20.4914	NA	20.1662	20.6271	19.7717	21.0114	20.2833	19.6649	NA	NA	NA	19.586	NA	19.6516	19.8705	22.0965	21.2794	22.7411	21.7563	21.0883	21.0946	21.0169	20.9605	21.5739	NA	NA	NA	NA	NA	NA	NA	NA	NA
Q8BMS1	99	Hadha	1	22.4292	22.0338	22.5542	23.5646	NA	NA	23.0178	23.4127	22.1977	23.1538	22.1513	22.0835	22.9002	NA	NA	22.3214	22.7784	21.9578	23.6116	22.5782	22.4384	22.2853	21.9985	22.067	22.7528	22.3633	22.0288	22.1378	22.2878	21.992	22.0865	NA	NA	24.0939	22.0163	22.1602	22.4122	20.8937	20.8641	21.6749	NA	NA	22.4214	24.3698	22.0039	21.7064
Q99JY0	40	Hadhb	1	21.589	22.6085	21.7544	22.3366	NA	NA	22.3615	22.3007	21.5581	21.813	21.9994	21.2693	21.676	NA	NA	22.141	21.0121	20.8547	21.9837	NA	NA	NA	22.1388	NA	NA	NA	21.2081	21.6546	NA	21.6944	NA	NA	NA	21.7216	20.9646	NA	21.1384	21.9495	NA	NA	NA	NA	21.6771	21.5897	22.1877	21.4485
Q61035	73	Hars1	1	22.0012	21.6993	21.9569	22.1169	22.9229	NA	21.8697	21.8983	21.7286	21.9601	21.4754	21.4034	NA	21.6006	NA	21.4654	21.2756	20.8139	21.9867	21.9942	21.674	22.0778	21.9753	NA	21.7902	21.6943	21.1131	21.9733	22.1063	21.8318	21.6836	NA	22.1056	22.2493	21.8403	21.4381	21.9877	21.9544	21.8731	22.2861	NA	NA	22.2687	22.2065	22.2098	22.1497
P08103	27	Hck	1	21.4701	21.5131	22.3344	21.9452	NA	NA	21.3502	21.9819	22.2306	22.0273	21.476	21.5316	NA	NA	NA	21.1992	20.8485	21.935	20.3911	21.3733	21.5399	21.1064	20.6635	NA	21.5861	21.9765	21.2104	21.536	21.0786	22.2668	22.1742	NA	21.0531	20.7234	21.9908	21.3898	21.1168	22.5637	23.3004	22.637	21.1646	NA	21.9601	22.0128	20.8245	21.8837
P51859	99	Hdgf	1	23.075	22.9613	23.1849	22.9743	NA	NA	21.6771	22.9566	23.1554	22.9364	22.822	22.632	NA	22.199	NA	22.6145	22.9958	23.1863	23.0087	NA	22.632	22.6513	22.1688	22.3178	22.6094	22.8734	22.3728	22.9586	23.0825	21.9393	22.7471	NA	NA	22.5787	23.196	23.0263	23.5093	22.851	22.6818	22.886	22.4673	NA	22.6496	23.3157	23.2879	23.1035
Q8VDJ3	297	Hdlbp	1	23.1502	22.7116	23.3505	22.923	NA	NA	22.7679	22.981	23.1959	23.3098	23.631	23.7687	23.9837	23.7768	22.1687	23.0899	23.5969	23.7801	23.5435	22.9341	23.1257	23.297	23.7702	23.8966	23.0457	23.3527	23.8497	23.2679	23.5196	23.1658	23.3497	23.8344	NA	22.6659	23.2768	23.6069	23.6816	23.5968	23.4212	23.3618	23.5552	23.2474	23.5154	23.5741	23.436	23.7419
P29416	43	Hexa	1	21.4712	22.3647	22.3605	22.5946	NA	NA	22.4082	22.2058	22.3624	21.9553	21.2464	22.1201	NA	NA	NA	22.2833	21.2582	NA	NA	21.3569	22.5564	22.3744	22.3263	21.0908	22.6	22.1583	22.6612	22.3006	20.3024	21.9064	21.3203	NA	21.6384	21.8449	21.2483	21.0297	20.4734	NA	NA	NA	NA	NA	NA	NA	NA	NA
P20060	70	Hexb	1	22.2832	22.3949	21.6249	22.435	NA	NA	22.7465	21.9582	21.4698	21.938	22.3736	21.7928	22.5086	NA	NA	22.4746	22.6348	21.3693	22.0265	NA	22.382	23.1075	NA	NA	NA	21.8774	21.4799	NA	22.0304	21.6687	22.3435	NA	NA	21.9912	22.114	22.1096	21.5812	21.7161	21.5658	NA	NA	NA	NA	NA	22.1071	21.2367
P70349	52	Hint1	1	23.8913	22.1959	22.002	21.2479	23.6458	NA	22.6138	21.5257	22.3737	22.504	22.3477	21.6781	NA	22.0874	NA	22.0583	21.2005	22.5158	21.8797	22.294	22.4299	21.6003	NA	23.1692	21.9955	23.7105	22.4101	22.7171	23.0448	22.4884	22.9984	23.4005	23.5335	22.2175	22.8876	22.8923	22.999	21.6672	21.71	22.3413	NA	NA	22.0397	22.1341	22.7506	22.9043
P17710	108	Hk1	1	22.8512	23.3066	22.8051	23.4246	NA	NA	23.0457	22.6708	23.4576	22.9144	22.0058	22.4943	23.7428	22.4296	22.4605	22.9409	23.2833	22.4089	22.1971	23.3421	22.9042	23.6083	23.3635	23.6063	22.8521	22.7243	22.3847	23.0131	23.2422	23.0273	23.7315	NA	NA	23.3351	23.1984	22.9061	22.7686	23.2314	23.2501	23.2026	NA	NA	24.2266	23.2928	22.648	23.0549
P63158	54	Hmgb1	1	24.3071	24.6061	24.3811	24.4119	NA	24.059	23.0227	24.9788	24.9484	24.8165	24.6999	24.2932	23.4281	23.8922	23.4661	23.5926	24.1874	25.055	24.9319	24.1926	24.0912	24.3795	23.6745	NA	23.7673	23.9908	24.7012	24.7683	24.6293	24.3038	24.0085	23.3365	NA	24.1433	24.2081	25.2306	24.827	24.0436	24.3628	23.9013	NA	23.9353	24.0687	24.2757	24.6641	24.2755
P30681	39	Hmgb2	1	23.9867	23.8258	24.2197	23.9711	NA	NA	23.6225	23.9769	23.37	23.3276	23.3078	24.0193	NA	23.394	NA	23.4888	24.1266	24.1286	23.4267	23.4501	23.8808	23.1403	21.7649	23.4444	22.6346	24.1078	23.3897	23.5298	23.0279	24.7043	23.2787	22.8571	NA	23.0751	23.9847	23.9012	23.7383	22.0651	24.7234	22.8655	23.2497	NA	22.9624	23.913	23.8236	23.3367
P18608	30	Hmgn1	1	22.7947	22.5363	23.4473	21.9735	NA	NA	NA	22.7356	22.7324	22.4522	22.7343	22.4181	NA	21.5745	NA	21.6857	22.0675	22.6282	21.7162	NA	22.5707	22.0375	22.2747	NA	20.9107	22.2742	22.9507	22.2877	22.6614	21.6174	22.4363	NA	NA	21.5265	22.2439	22.6158	22.3446	22.4672	23.1729	22.3349	NA	NA	21.8542	22.0373	23.064	22.8714
P09602	92	Hmgn2	1	24.6014	24.3627	25.3	24.7266	23.742	NA	NA	24.9065	24.7003	24.0648	24.1185	24.8802	24.2975	22.6201	NA	23.689	25.1086	24.5657	24.6018	24.7333	24.9125	23.7675	23.8798	NA	24.6928	24.7758	24.3568	24.6916	23.6679	24.6371	24.1105	22.546	23.1591	23.5861	23.9763	24.368	24.1486	24.1569	24.2511	24.5694	23.5237	NA	24.1755	24.414	24.6028	23.5745
Q9CX86	58	Hnrnpa0	1	22.4944	22.8567	22.5261	22.2255	NA	NA	21.9118	22.1866	22.1438	22.5082	22.7333	22.3315	NA	22.6801	23.1608	22.9456	23.0114	22.8282	23.238	NA	22.7506	21.6035	21.9585	NA	22.5884	21.8846	22.1495	22.393	21.1215	21.81	21.7973	NA	22.9219	22.5989	21.991	21.995	21.5387	22.1767	22.4144	21.5586	NA	21.4436	21.9238	22.4981	22.2084	22.8485
P49312	360	Hnrnpa1	1	26.0235	25.2962	25.1939	25.3125	NA	25.7123	25.4764	25.4366	25.436	25.1138	24.9641	25.4831	25.8209	25.5849	NA	25.3337	25.5508	25.6279	25.2487	25.392	25.2371	25.3263	25.2247	25.554	25.5941	25.5414	25.4965	25.5907	25.337	25.6737	25.2196	25.8493	25.135	25.2847	25.5605	25.8253	25.347	25.0222	25.8131	24.9746	24.9995	25.9168	25.2931	25.6658	24.8989	24.6436
O88569	417	Hnrnpa2b1	1	26.0858	25.6872	25.4466	25.4479	25.3086	25.9271	25.2755	25.3823	25.5681	25.7156	25.5523	25.9358	25.6132	25.5949	25.6862	25.8448	25.0727	25.4437	25.9519	25.1057	25.5363	25.0266	25.2914	26.0063	25.108	24.9537	25.4332	25.8219	25.5972	25.8721	24.9582	25.1312	25.802	25.4306	25.4593	25.5987	25.4635	25.6553	25.8371	25.7411	25.8804	26.3217	25.6671	25.4654	25.9547	25.6091
Q8BG05	207	Hnrnpa3	1	25.8326	25.175	25.1412	25.6122	25.0849	NA	24.4501	25.1882	25.5191	25.7134	25.4412	25.4422	25.0817	25.6666	24.1442	25.1164	26.074	25.3266	26.005	24.0067	25.2309	25.077	25.058	24.2299	25.2616	25.4009	25.4123	25.3826	24.6389	25.6619	25.0934	24.809	24.3818	25.1011	24.9657	25.4734	24.5573	24.4723	25.0618	24.8188	24.1868	25.5295	24.6632	24.6766	25.3062	25.2703
Q99020	176	Hnrnpab	1	24.8344	23.7229	24.1581	23.9128	NA	24.0922	23.8104	24.3327	24.2194	23.9948	24.0301	24.1012	23.9122	23.6352	24.8467	24.243	24.475	24.1841	24.0088	23.9604	23.6773	24.1699	23.6418	24.153	24.218	23.9997	24.2762	23.9694	23.528	24.0739	24.273	23.4678	23.7463	23.8813	24.1233	24.3143	23.6392	23.7085	24.2248	23.8351	23.5689	24.2929	24.3177	24.2014	23.9702	23.5068
Q9Z204	138	Hnrnpc	1	24.3016	24.4115	23.8152	24.0162	23.8745	23.4859	24.6426	23.9086	24.5616	24.2967	23.5209	24.2466	23.96	22.9507	24.893	23.095	23.2502	23.1239	23.4865	23.5586	23.0084	22.7982	23.3031	23.4414	23.5714	23.177	23.7009	23.4312	23.3696	24.248	23.7849	23.6105	23.8828	23.6357	23.6798	23.6993	23.6915	23.4794	23.0904	23.1205	23.6835	23.8981	22.4691	23.7755	23.7643	23.4922
Q60668	152	Hnrnpd	1	23.755	23.3871	23.6816	23.8566	23.2209	23.5233	23.4872	24.0223	23.5698	23.195	23.2272	23.4729	24.0384	22.5334	23.5497	23.2126	24.0004	23.3177	23.2613	22.4665	23.4287	22.6901	22.6664	23.6566	22.7715	24.2363	22.8182	23.9325	22.6635	22.6719	22.542	23.1126	23.7051	22.6905	23.2755	22.8489	22.2863	22.4205	22.6975	22.9681	23.2981	23.5781	22.9561	23.5831	23.3829	23.5716
Q9Z130	75	Hnrnpdl	1	22.1907	20.7753	22.513	21.8546	NA	NA	NA	22.3477	22.3717	22.111	21.5381	22.03	22.4033	NA	NA	22.0518	22.0279	21.7147	22.5266	NA	22.0476	21.8928	NA	22.9134	21.1822	21.7945	21.1962	22.0522	21.6427	21.7774	22.0409	NA	22.3055	21.7183	21.8626	22.0438	21.7601	21.5309	22.0398	21.9289	NA	23.6488	21.8554	21.7182	21.8759	21.9528
Q9Z2X1	181	Hnrnpf	1	24.8135	24.7481	24.2512	24.7033	23.93	NA	25.139	25.1518	24.5374	24.9295	24.6038	25.2052	24.306	24.2337	24.0879	25.0209	24.5123	24.8697	24.3562	24.8284	24.2995	23.9982	24.4784	25.2449	24.7209	24.6837	24.5333	24.2772	24.5521	24.8374	24.4449	24.6004	24.7938	24.8497	24.9382	24.3228	24.5255	24.9569	24.3201	24.134	24.7095	24.8865	25.1562	24.9913	24.2827	24.2385
O35737	112	Hnrnph1	1	23.8467	23.8188	24.1703	23.3232	NA	NA	23.8994	23.3829	23.6778	24.0512	24.0281	23.7735	24.3033	24.1979	NA	24.3733	24.1592	24.0578	25.0909	23.6148	23.5461	23.481	24.1093	24.1678	23.3298	23.9839	23.974	24.087	23.3465	23.6576	23.9102	NA	NA	24.0183	23.627	24.0639	23.6322	24.4594	24.5124	23.8161	24.5379	NA	24.1428	24.4793	24.1768	24.144
P61979	402	Hnrnpk	1	25.1167	25.3208	25.2297	25.4335	25.3727	25.6538	24.6957	25.114	24.9843	25.5269	25.5857	25.275	24.3726	24.6828	23.7969	25.1417	25.3209	25.6158	25.4569	24.2286	25.4421	24.7463	24.9777	24.2433	24.8371	25.0974	25.2777	25.0709	25.2369	24.8714	24.9805	25.041	25.0934	25.0831	25.6912	25.6087	25.1943	25.2263	25.8294	25.3737	24.196	24.2265	25.2892	25.495	25.9645	25.9504
Q8R081	209	Hnrnpl	1	24.135	24.2165	24.0589	24.1081	24.3864	23.9876	23.9898	24.0402	23.7682	24.3653	23.2642	24.3182	24.4667	24.1593	24.2194	23.8184	23.2964	23.1772	24.2307	23.926	23.5866	23.8192	23.9227	24.045	24.3126	23.9529	23.5175	23.8808	23.6813	23.6746	23.8061	23.863	24.6695	23.8051	23.7645	23.4725	23.1758	24.2304	24.1821	23.4832	24.6205	24.4202	23.7189	24.1033	24.0333	23.7036
Q9D0E1	230	Hnrnpm	1	23.9323	24.3286	24.2354	23.9151	NA	NA	23.1352	23.8543	24.3234	24.3512	24.2506	24.1866	24.4226	23.9824	24.195	24.1976	24.423	24.36	24.6883	24.1283	23.9465	23.606	23.988	23.2685	23.9545	23.8381	24.1889	24.1461	23.9603	23.744	23.7087	NA	23.319	23.5693	24.2197	24.1959	23.9732	24.0037	24.5701	23.8625	24.1037	23.9267	23.9816	24.0873	24.5377	24.2199
Q8VEK3	368	Hnrnpu	1	25.3367	24.9299	25.0271	24.555	25.4059	26.5033	24.9824	25.0555	24.6621	24.9177	25.1724	25.0707	25.1676	25.4958	25.0552	24.4701	25.7517	25.093	25.1388	24.6028	24.4842	24.176	24.2423	25.4755	24.5181	25.0312	25.1107	24.8028	24.9336	24.9933	24.308	24.9329	25.419	24.3059	24.9089	24.8009	24.7354	24.7386	24.8538	24.466	24.979	25.9556	24.8218	24.6692	24.9524	24.7516
Q00PI9	98	Hnrnpul2	1	22.2775	22.1986	21.6135	22.1365	NA	NA	21.957	21.8965	22.0016	21.8522	21.8117	21.9364	22.7748	23.0226	NA	22.7332	21.9367	21.9136	22.8806	22.803	22.4839	21.9747	22.7586	22.6454	22.8472	22.5456	22.361	22.6282	22.0162	21.7095	22.7501	22.7302	NA	22.8687	22.7149	21.2134	22.4248	22.3935	22.241	22.1451	21.9169	NA	22.4612	22.3365	22.026	21.84
O70503	46	Hsd17b12	1	21.6967	NA	21.8603	NA	NA	NA	21.3965	20.5515	21.5207	20.8409	21.7218	21.898	NA	NA	21.6555	20.1905	21.1101	21.7848	21.1264	21.7697	21.9022	21.7497	21.623	21.8259	NA	21.2444	22.1833	21.1777	20.6184	21.4833	20.7989	NA	NA	NA	20.7117	21.1849	21.4983	21.1795	21.9698	21.2984	NA	NA	22.4006	20.7833	21.1142	21.5465
P07901	391	Hsp90aa1	1	26.1828	25.5471	26.2347	26.5449	27.1426	27.0544	25.5619	26.0065	25.0078	25.9539	25.1536	26.1521	25.3312	25.5443	26.0605	25.2811	25.9488	25.5158	24.7524	25.2332	25.6047	25.9508	25.3086	25.8471	25.7285	26.2089	24.9265	25.06	25.1427	26.2685	25.94	25.7697	25.5913	25.4005	26.0294	24.7672	25.3296	25.3725	26.9762	25.6825	25.7592	25.9043	25.2373	26.2928	25.0952	24.881
P11499	895	Hsp90ab1	1	27.9026	27.8265	27.6172	27.8342	27.0507	27.3167	26.8388	27.3871	28.378	27.8611	28.1373	28.0453	27.4186	27.6494	27.7889	27.5634	27.8033	27.9562	28.2502	26.7569	27.8108	27.5838	27.3242	26.8967	27.3905	27.8272	27.0164	28.1434	27.557	27.9806	27.3652	27.1773	26.7423	27.1688	27.9782	27.6868	28.1686	28.3572	27.7167	27.6602	26.8298	26.6236	27.1641	27.3433	27.3613	27.2108
P08113	739	Hsp90b1	1	26.5525	25.1438	24.786	25.0604	26.8106	NA	26.0983	24.784	25.2677	25.5361	25.0696	24.6948	25.8153	25.2283	26.6731	25.8584	25.8621	25.2367	25.789	25.8576	24.5876	25.1317	24.8698	26.9908	24.7874	24.9165	25.127	25.0327	25.086	24.3151	25.0936	26.0889	25.8417	24.6973	24.9622	24.8709	25.7453	24.4402	25.0465	24.69	25.5094	27.3882	24.9602	25.1279	25.1363	25.2959
Q61316	388	Hspa4	1	24.1157	24.2928	24.4	23.7241	NA	25.3422	24.3017	23.9322	23.6121	23.8228	23.0683	23.3965	25.3754	24.3571	23.7159	23.6265	24.0552	23.3427	23.0553	23.6107	23.0806	23.6366	23.9332	24.2995	23.4055	23.5033	23.1818	23.1857	23.7522	22.9103	23.6415	24.2041	24.2667	23.5073	23.4149	23.3522	23.6338	23.7844	23.2407	23.5503	24.225	24.6405	24.0562	23.9041	23.8672	23.8021
P20029	894	Hspa5	1	27.8648	26.4995	26.8352	26.8175	27.0536	NA	27.5934	26.3058	26.6583	26.7119	28.0459	27.3207	27.001	27.4252	27.0614	26.893	26.8625	26.9487	27.0604	27.7876	26.8783	27.3318	26.9515	26.49	26.3398	26.6422	27.4307	26.8092	27.346	27.0931	27.2809	27.6117	26.9322	26.8005	26.9776	27.4739	28.1568	27.2159	27.0677	27.1983	27.5731	26.7037	26.8035	26.5713	27.3998	27.4892
P63017	933	Hspa8	1	27.7443	26.2345	26.5984	27.0054	26.0967	26.4543	26.4194	26.4215	26.4849	26.2797	27.0028	27.5565	26.1019	26.3879	27.0845	27.0246	26.7077	26.4173	26.3647	26.6779	26.9201	26.8286	26.7696	27.2529	26.6413	27.0719	26.9631	26.5589	26.5792	26.9803	27.0014	26.3572	27.5859	26.9065	26.9817	26.9168	26.8665	26.718	27.289	26.8648	26.1526	25.8645	26.8239	26.5991	26.7356	26.8253
P38647	530	Hspa9	1	25.5806	24.5242	24.491	24.9251	25.5719	25.059	25.4248	25.2668	24.3869	24.2553	24.9568	25.1837	24.9648	25.0195	24.6162	24.5791	25.0369	24.6676	24.6803	25.8541	25.5394	24.6663	25.3114	25.3532	24.9168	24.7043	25.1548	25.1785	24.7467	24.564	24.443	25.0599	25.6638	24.3321	24.9274	24.5501	24.8137	24.8195	24.8506	25.1421	25.6307	25.3406	24.7044	24.6903	24.6744	24.4604
P14602	143	Hspb1	1	23.6455	21.9441	23.1717	22.5931	NA	NA	22.6698	22.7131	22.1312	22.752	22.7066	24.1886	23.2578	23.8212	23.3477	23.6266	24.1365	22.5033	22.7104	24.0311	24	23.2184	23.2335	23.5156	23.2407	23.6642	23.1451	22.5366	22.8254	24.1681	22.9609	23.8109	23.828	23.3579	23.8655	22.3747	22.133	23.2886	24.1348	23.621	23.7703	23.5909	22.9275	23.0498	22.4622	23.086
P63038	605	Hspd1	1	26.1414	26.5065	26.3423	26.3054	25.831	26.0968	26.4115	26.1049	26.5625	26.1217	26.1251	26.3463	25.4676	25.5252	24.7933	25.5386	25.5904	25.9807	25.9562	26.8273	26.3753	25.698	26.0002	25.5418	26.0991	25.8343	26.3093	26.0549	26.4696	25.8883	25.8732	26.13	25.9718	25.6554	26.0692	26.4899	26.2163	26.2204	26.1868	26.4328	26.2534	25.4147	25.5857	25.9726	26.6131	26.7009
Q64433	146	Hspe1	1	26.2226	24.4097	23.8053	24.9993	24.9825	NA	26.187	24.3885	24.6717	24.5362	25.4078	25.9612	24.6294	24.8452	25.0908	25.9942	24.6796	23.9916	25.3716	26.0913	25.6779	24.9426	25.3108	26.4614	24.8456	24.108	24.5824	25.1607	25.6177	26.0922	25.8952	26.0394	25.6467	25.1564	25.6045	25.3179	25.3674	25.646	24.5725	24.8696	25.5828	24.995	23.4835	25.1207	24.8744	24.5179
Q05793	101	Hspg2	1	22.3603	22.6595	23.0953	22.6322	NA	NA	22.7458	22.9212	22.1529	22.441	NA	NA	NA	NA	NA	NA	NA	NA	NA	23.1125	23.2668	22.4095	NA	NA	23.2717	22.5709	23.1644	22.1573	23.088	22.6349	23.5555	NA	NA	22.792	22.6885	22.4894	22.3091	21.6191	22.0774	21.8589	22.9533	23.503	21.6963	22.3751	22.1673	21.6387
Q9JKR6	236	Hyou1	1	23.3069	23.6004	23.2824	23.4315	NA	NA	23.6357	23.6605	23.143	22.3811	22.8234	22.8923	NA	24.5791	NA	22.8334	23.3834	23.3431	22.9075	23.2454	23.4975	23.3328	23.3494	NA	23.3593	22.8425	23.2579	23.3963	23.3994	23.2496	23.2477	23.6595	24.2067	23.2071	23.6856	23.2024	23.4311	23.2403	24.2908	22.807	24.1662	23.6062	23.0819	23.4009	23.3245	22.7821
Q8BU30	174	Iars1	1	22.6568	23.0596	23.0877	22.7631	NA	NA	22.6897	22.8678	22.8351	23.2199	23.1769	22.6551	NA	23.4496	NA	22.9174	22.3403	22.8315	22.5429	22.1993	22.7436	23.0986	23.1431	NA	22.9744	23.173	23.2307	23.0535	23.0098	21.6068	22.3588	NA	NA	22.6251	22.5619	22.6296	23.0257	23.1644	22.3534	22.7568	23.0195	NA	23.0647	22.6392	22.7981	22.6056
O88844	72	Idh1	1	21.8742	NA	22.5774	21.5118	NA	NA	NA	NA	21.7688	22.5233	21.3621	22.0829	21.6151	21.6468	22.6687	22.1955	22.4428	21.2364	21.4188	21.3764	21.9399	21.0635	22.3824	NA	21.5818	21.1737	21.1453	21.2863	21.9049	21.571	21.7676	NA	NA	21.6734	21.3544	21.375	21.2912	20.7734	21.4355	21.2135	21.6485	NA	21.7006	22.0354	21.3394	21.9494
P54071	240	Idh2	1	24.1706	23.5605	23.4426	23.7279	24.1223	NA	24.5478	24.3112	23.4528	23.0516	22.8868	23.9714	23.9984	23.4318	24.4635	23.8207	23.2989	22.8944	22.5464	23.4306	24.521	23.8772	NA	24.2352	23.5193	24.1703	23.251	23.315	23.1791	23.6972	23.9872	24.4146	23.8539	23.0185	24.1928	23.6955	23.6155	23.5788	24.3481	23.8789	23.9886	23.6294	23.7321	24.3901	23.5678	23.6258
Q9D6R2	82	Idh3a	1	22.5451	22.127	21.5227	21.3921	NA	NA	22.362	21.8399	21.6922	21.9236	21.5005	22.0883	21.4321	21.6833	NA	21.9662	22.2424	21.6691	21.728	22.7938	22.0584	21.6848	22.3588	NA	22.1521	23.2455	22.0045	22.239	21.7686	21.7866	21.1832	NA	NA	21.0604	21.727	21.8549	22.0111	21.9303	21.9886	20.6193	22.5978	NA	21.4245	21.9807	22.3894	22.0437
P0DOV2	75	Ifi204	1	21.9634	21.8683	22.8053	22.1001	23.3057	NA	NA	21.3631	21.9021	20.9671	21.8486	21.8033	21.4661	21.2774	NA	22.0984	22.5094	20.7381	22.4507	NA	NA	NA	NA	NA	NA	23.4084	NA	NA	21.8838	22.5003	21.4345	NA	22.2763	22.9605	22.0331	21.1037	20.5798	21.4775	22.155	22.5388	NA	22.227	21.432	22.1331	21.1775	21.6051
Q64282	195	Ifit1	1	24.1745	23.4136	24.314	23.7274	NA	NA	23.7974	24.0067	23.3265	22.9317	22.5492	24.4467	23.942	23.0485	NA	24.1263	24.202	22.677	22.8211	24.6854	23.7558	24.5443	23.4044	24.2337	24.0933	24.045	23.175	22.374	23.4576	23.2364	23.7503	23.8869	NA	24.1505	23.8002	22.6644	22.3242	23.1484	23.668	24.0714	NA	NA	24.1707	24.1682	22.2962	23.1702
Q64345	76	Ifit3	1	22.4449	NA	23.1167	23.04	NA	NA	21.7638	22.8102	21.9563	21.344	21.7946	22.6231	22.2827	22.1023	22.1228	23.5115	22.7398	22.778	22.3642	NA	23.7907	23.8666	NA	NA	22.8645	22.7777	21.6219	21.7706	22.1961	22.2871	23.0351	NA	NA	24.3124	22.9873	22.2415	22.3307	22.0226	21.826	22.7324	NA	NA	22.8906	22.9947	22.2936	22.1287
Q9CQW9	53	Ifitm3	1	23.0127	22.7424	22.895	22.0308	NA	NA	23.4508	22.3923	21.9671	22.4037	22.1028	22.4021	NA	22.355	NA	21.4467	22.1157	22.0213	21.765	22.7482	23.5186	24.2142	23.9815	24.7382	23.6347	23.3854	22.8437	25.5816	23.0544	23.6166	23.5213	24.2413	25.0928	23.1446	23.4184	23.0078	23.2625	22.8581	23.283	22.6428	NA	23.279	22.7995	23.2175	22.6962	22.972
Q9Z1X4	47	Ilf3	1	21.4552	22.536	21.6503	21.385	22.0961	21.856	21.2267	21.8568	20.8896	21.7921	20.7212	21.0946	NA	NA	21.6188	20.8632	21.265	20.805	21.0289	NA	20.5204	21.2479	NA	NA	21.1905	21.0498	20.8434	20.3736	20.8535	21.5505	21.0002	22.5008	NA	21.1616	21.3025	21.362	21.0865	20.9412	20.7297	20.4867	NA	NA	21.2908	20.9809	21.0006	20.6282
Q8CAQ8	180	Immt	1	22.8209	23.2658	22.691	22.8549	NA	NA	23.1721	23.2385	22.9773	23.5867	22.7982	23.1845	23.5492	23.2054	23.0472	23.7002	22.9225	23.0754	23.6377	23.5093	23.606	22.913	22.0991	24.1247	23.2705	22.7205	23.6003	23.3973	23.2108	22.6425	23.0789	23.7383	23.1845	23.3245	22.9849	23.5944	23.3173	23.2436	23.2253	22.6669	23.1908	23.1559	23.2622	23.0957	22.895	22.8936
P24547	78	Impdh2	1	25.0823	24.8258	25.2452	24.8773	NA	NA	25.7028	25.6937	25.0153	24.7239	25.7113	25.8263	25.6538	NA	NA	24.922	26.3513	25.8018	NA	25.1104	24.99	25.4373	25.7458	NA	25.5023	25.8896	25.2367	25.5764	24.7803	25.2251	24.8021	NA	24.957	25.0685	24.7286	24.5791	24.8235	24.7763	25.4492	24.3184	NA	25.1461	23.8925	24.1476	24.6446	24.1308
Q8BKC5	71	Ipo5	1	22.0639	23.5361	22.7727	21.9472	NA	NA	23.3855	22.5245	23.3393	22.9721	22.0789	22.4396	22.7785	22.5425	23.5465	22.3646	23.0419	22.4638	21.6942	22.0455	22.0313	22.2544	22.1409	21.9448	23.0126	22.4046	21.9884	22.4774	20.7952	21.6825	21.9182	NA	NA	21.4129	21.8948	21.7173	21.2317	25.8929	22.8634	24.3222	22.9947	23.4648	22.8918	24.0509	22.0959	21.9739
Q91YE6	67	Ipo9	1	22.0855	22.7435	21.6605	22.505	NA	NA	22.3957	22.8407	22.8737	21.8243	22.0218	22.2936	23.0723	23.61	22.7124	22.4591	23.2463	22.7893	22.5408	NA	22.3218	22.5482	NA	NA	23.5209	23.2933	22.2677	22.0079	23.1773	22.5087	23.8559	23.1883	22.7527	23.4284	24.1242	22.5564	23.0295	21.9707	22.3505	23.5147	23.141	23.2556	23.1448	23.3499	22.472	22.4815
Q9JKF1	502	Iqgap1	1	24.0733	24.3432	24.1228	24.1398	NA	NA	24.0097	24.0449	24.368	24.5626	24.3087	24.1025	24.6748	23.8647	24.8308	24.6267	24.666	24.5799	24.7231	24.2749	24.2921	24.0982	23.8049	24.1353	24.0574	24.1934	24.233	24.3281	24.0679	23.7619	24.1987	24.0675	24.3197	24.3848	24.3872	24.1697	24.1719	24.2403	24.5425	24.3579	23.9037	24.3925	24.3196	24.2557	24.4986	24.6154
Q64339	156	Isg15	1	26.3222	24.4769	25.9119	26.0216	NA	NA	25.153	25.6735	24.0833	24.4266	23.6446	25.2624	25.3711	24.7884	25.4782	25.7294	25.644	23.4518	23.2019	24.3948	25.7044	26.336	NA	25.1194	25.8193	26.325	24.153	24.8641	23.8087	25.5147	25.4229	25.0484	26.0488	25.4854	25.8075	24.2295	23.8771	24.8529	25.7301	25.7901	26.8892	NA	25.7422	25.4147	24.0119	25.2853
P09055	159	Itgb1	1	23.0608	22.3947	22.8837	22.8909	NA	NA	23.4449	22.9269	22.744	22.8826	22.6704	22.6243	23.8757	22.6943	23.0429	22.5305	22.219	22.3983	21.9964	22.0795	22.4059	21.6063	22.0125	22.4059	22.4926	22.1719	22.4221	21.8465	22.6608	23.3948	22.7506	NA	NA	22.1706	22.644	22.1998	22.4494	22.735	22.4995	23.1634	22.6615	23.0708	23.3269	22.6541	22.3638	22.5509
P97825	50	Jpt1	1	22.1333	21.5807	21.4127	21.7257	NA	NA	21.3685	21.4682	21.5488	21.7021	21.3428	21.7231	NA	21.5388	NA	21.6287	21.6771	21.0425	20.6781	NA	21.9514	21.9673	21.6718	NA	21.943	22.0022	21.0315	21.3034	21.4384	21.5836	21.9155	NA	21.6857	22.0622	21.3707	21.1725	21.0826	21.9578	22.2105	22.2918	NA	NA	21.8775	21.6992	21.0522	21.1068
Q99MN1	129	Kars1	1	22.7058	22.6466	22.7781	22.5478	NA	NA	23.0379	22.6164	22.8488	22.9447	23.0878	22.6459	21.8857	22.3601	22.8045	22.3199	22.5334	22.4364	23.0789	22.0925	22.5123	22.2645	22.0745	22.3224	22.7618	22.739	21.5096	22.4119	22.1625	22.9626	22.4106	NA	NA	22.2662	22.962	22.1349	22.5511	22.8632	22.4954	22.6886	NA	NA	22.3988	22.9389	22.9189	22.5471
Q8R1L4	28	Kdelr3	1	20.7022	20.4356	20.1897	20.2674	NA	NA	21.3036	20.4466	19.2729	19.4576	20.7631	20.275	NA	19.8629	NA	20.2737	20.2532	19.5578	19.1713	20.7394	19.9556	19.6889	20.2662	NA	20.7323	20.867	20.6917	20.0369	21.0802	21.198	NA	NA	20.9802	20.2478	20.9907	20.9097	21.0949	19.4921	19.8023	20.7257	NA	21.1289	20.4449	20.4989	21.3268	21.4064
Q3U0V1	174	Khsrp	1	23.1168	23.3821	23.1251	23.5101	22.9612	22.9285	22.4583	23.3364	23.7362	23.5111	23.8852	23.746	22.8572	23.2818	NA	23.7489	23.5108	23.8303	23.9473	22.6192	23.2088	22.6233	23.7343	NA	23.629	23.6741	23.7277	23.843	23.5049	23.1059	23.4846	22.7731	22.748	23.3712	23.6599	23.8405	23.8581	23.3746	23.3211	23.2795	NA	NA	23.4024	23.2918	24.0827	24.0732
Q61768	142	Kif5b	1	22.4424	23.3755	23.0904	23.1164	NA	NA	22.7768	22.922	23.0889	23.3615	22.6362	23.0636	23.5167	22.8916	23.4986	23.0567	23.3646	22.7287	22.475	23.4654	23.2403	23.0314	22.332	22.795	23.4923	22.5612	22.1958	22.4988	22.3944	22.9462	22.4818	23.0503	22.7679	22.726	22.7535	22.7512	22.747	22.8069	23.163	22.5533	NA	NA	22.7032	22.9179	22.6966	22.471
P52293	45	Kpna2	1	21.0062	22.1678	21.7635	21.5409	NA	NA	21.5617	21.5802	20.3737	21.2785	NA	NA	NA	NA	NA	NA	NA	NA	NA	NA	22.824	22.2592	NA	NA	21.859	22.0457	21.9258	22.2392	19.9981	22.2094	21.4947	NA	21.0168	21.5259	21.5194	21.159	20.6277	21.7062	NA	22.1123	NA	NA	22.2239	NA	21.1822	21.6145
P70168	323	Kpnb1	1	23.9251	24.312	24.1551	24.125	24.398	25.4267	23.7142	24.3603	24.5778	24.257	24.4668	24.1752	23.3748	24.5188	23.6399	24.0306	24.7421	24.2374	24.5804	23.8579	24.2542	24.3748	24.7116	24.0989	24.0507	24.2944	24.0159	24.2949	24.1449	24.0536	23.4705	24.6334	NA	23.8721	24.2166	24.4233	23.903	24.9091	24.3773	24.4033	23.7065	24.1754	23.7492	23.7413	24.3539	24.2304
Q61595	136	Ktn1	1	22.2313	22.8855	22.6924	22.697	NA	NA	22.9332	22.3768	22.4715	22.4864	22.2327	23.1695	NA	22.5372	22.5772	22.5185	23.0304	23.2548	22.9259	23.2871	22.4726	22.5841	22.4862	NA	22.564	22.2261	22.9451	21.9572	22.5103	22.3551	23.0928	NA	NA	22.4061	22.2451	22.2104	21.7104	22.0145	22.4283	21.4132	22.4366	NA	22.1593	22.4263	21.9275	21.807
P02469	115	Lamb1	1	22.2482	21.4493	22.3189	21.6096	NA	NA	22.4717	21.7822	22.9538	21.986	22.1585	23.0537	22.1566	22.7606	NA	21.4399	22.1502	22.0113	22.4559	22.3306	21.8662	21.9746	21.8783	NA	22.0724	22.1725	22.6118	22.4919	23.061	22.3448	22.3422	23.1235	NA	22.0322	22.1735	22.7129	21.918	21.3175	21.1665	21.468	22.3058	NA	21.8408	21.4922	22.1072	22.4186
P02468	82	Lamc1	1	21.7562	21.5917	21.7526	22.3465	NA	NA	23.2748	22.4474	22.3082	22.4083	21.9116	22.0902	21.8003	21.2131	22.0584	21.5695	21.6191	22.0523	21.8996	NA	22.5315	23.1533	NA	NA	22.1527	21.6999	21.7756	21.6974	22.5707	21.9463	22.0028	NA	NA	21.7414	22.4798	21.8774	21.9868	22.0107	22.5607	22.1154	NA	NA	21.8088	22.0028	22.5647	22.829
P11438	118	Lamp1	1	24.6168	24.4367	23.8071	23.9516	NA	NA	23.6297	23.8778	23.7272	23.7976	22.8316	22.9535	NA	24.7175	NA	24.0043	22.7266	23.6266	23.2028	25.052	23.0913	23.217	23.7378	NA	23.1812	23.6847	23.7139	23.4357	23.7875	23.4348	23.7754	24.0276	23.6785	22.9158	23.0328	23.7677	23.4136	24.5195	22.5304	22.344	NA	24.0931	23.0501	23.8276	22.8871	23.5728
P17047	53	Lamp2	1	23.3449	22.4355	21.6954	23.0015	NA	NA	22.5021	21.9263	21.3231	21.8554	21.5601	22.209	NA	22.7476	NA	22.5209	23.1014	21.8163	21.5824	NA	22.4515	22.0552	NA	NA	21.6966	21.6404	21.7323	20.8229	21.6828	21.4157	20.7378	22.4883	22.9299	21.5373	22.0055	21.1122	21.1868	22.0415	22.3583	22.1462	NA	22.9947	22.6727	22.7421	22.3927	21.679
Q9CPY7	50	Lap3	1	21.9047	20.364	21.3103	21.0986	NA	NA	20.9261	21.2955	21.1627	20.8392	20.7988	20.8771	NA	21.4375	NA	20.9658	21.3544	20.0697	NA	20.5476	20.1492	20.9076	21.0013	NA	21.3515	21.3678	20.1487	19.596	20.751	21.1707	22.585	NA	22.1357	21.1934	22.3724	21.7539	19.8227	21.0993	22.1479	21.4917	22.1526	21.8448	21.5757	22.0963	20.537	21.4621
Q8BMJ2	90	Lars1	1	22.1678	23.2165	22.4983	22.7563	NA	NA	22.99	23.2775	21.7119	22.8959	22.5497	22.9805	NA	23.105	NA	22.2177	22.6443	22.3497	22.7598	22.0527	22.7438	22.5493	22.7575	NA	22.2171	22.6063	22.7909	22.7248	22.0671	22.7802	21.9044	22.8976	NA	22.6938	21.9958	22.0776	22.8451	22.8242	22.9277	21.7639	NA	23.5364	23.1502	22.7621	23.0113	22.3174
Q61792	121	Lasp1	1	23.4701	23.0058	23.2715	23.3526	NA	NA	22.9524	23.2527	24.1341	24.2088	24.4631	23.5039	23.1578	24.2658	NA	23.4081	23.0778	24.4012	24.0623	22.1638	24.2314	23.4542	23.8305	23.3696	23.4321	23.8662	24.0851	23.6869	25.5218	24.158	24.3143	NA	23.3281	24.0645	23.799	25.293	25.1029	25.4246	24.9483	24.1541	23.7169	23.8371	24.1178	24.485	24.666	25.2502
P06151	455	Ldha	1	26.907	25.3899	25.316	25.1429	25.1529	27.1523	25.1288	25.4077	25.6355	25.09	24.3277	24.5501	26.4668	24.8699	26.0432	25.4098	25.4229	24.6803	24.7021	25.8695	24.8918	25.3803	26.4862	26.7936	25.1762	25.0257	25.0017	25.1624	25.1817	24.7192	25.1321	26.8436	25.887	25.721	25.9346	25.014	24.4013	24.372	25.497	25.2761	26.3763	26.4405	25.9141	25.3698	25.3756	24.9166
P16045	338	Lgals1	1	28.6897	26.5136	26.6293	26.2616	26.2468	29.2709	25.9828	26.1335	27.3823	26.4565	27.0103	25.9784	26.6664	26.0977	27.3167	25.2933	26.0344	26.5571	26.1885	27.4188	26.471	25.8951	26.131	27.4905	26.0664	26.5407	26.9153	26.3517	27.0246	26.1995	26.0552	27.4096	27.504	25.8792	26.4214	26.8559	26.8214	25.398	27.0969	25.8166	27.4622	27.8875	26.2276	26.5716	27.0312	27.321
P16110	71	Lgals3	1	23.5369	23.2607	23.4615	23.4428	NA	NA	23.6538	22.9525	23.2879	22.8608	22.9165	21.852	23.5992	22.0624	NA	22.4323	23.1269	21.164	22.0204	22.5359	22.2141	22.9741	22.5918	NA	22.1199	22.1532	21.1266	21.5276	21.8187	21.1969	22.6562	NA	NA	22.1522	22.3814	22.0591	21.1949	21.9702	22.3137	22.8607	NA	NA	23.0447	23.6554	22.0004	21.5069
O08573	124	Lgals9	1	23.8702	21.8003	23.5677	23.3142	NA	NA	23.6162	22.385	22.0991	21.5339	22.8694	23.716	24.6663	22.6712	24.1313	23.2609	23.2139	23.3185	22.8747	23.5858	22.7609	23.7068	NA	23.7556	23.233	23.6762	22.6457	23.154	22.6973	23.5991	23.3494	NA	23.4078	22.602	23.2984	23.1576	23.1581	23.522	24.3275	23.834	23.4263	24.4655	23.865	23.7683	22.9486	23.6063
O89017	22	Lgmn	1	19.8556	20.0718	19.7391	19.7272	NA	NA	20.2741	19.5043	19.9043	20.0293	19.4282	19.5174	NA	NA	NA	20.2632	19.2062	19.5048	19.437	19.6484	NA	19.7499	NA	NA	19.8392	NA	18.8404	18.9333	19.1276	19.662	20.202	NA	NA	20.3531	20.196	19.0774	19.4257	19.9392	18.8532	20.171	NA	NA	19.6829	19.839	18.8997	19.3833
Q9ERG0	131	Lima1	1	22.7109	22.8902	23.2018	22.5952	NA	NA	23.4611	22.8381	22.4052	23.1933	23.6632	23.1575	22.5901	23.1789	NA	23.1268	22.6676	23.1094	22.5833	22.9056	22.9312	22.0599	23.1085	NA	22.3609	23.0262	23.7899	23.0992	23.8567	23.5685	23.211	23.0366	NA	23.2658	23.652	23.9126	23.3788	22.683	22.577	22.7258	NA	23.5738	23.5259	23.3559	23.3722	24.0121
Q9D0F3	111	Lman1	1	23.3133	NA	22.7668	23.0496	25.7436	NA	23.8357	23.7117	23.5703	22.3581	23.4595	22.6775	24.9713	24.3138	24.4992	23.8114	23.726	22.5829	23.0353	NA	22.45	NA	23.8718	NA	24.2486	22.4629	23.3037	21.4155	22.7539	NA	NA	NA	NA	22.7712	23.0769	22.9972	22.9508	23.5953	23.7611	23.2495	NA	NA	23.4439	NA	22.6478	22.9603
Q9DBH5	70	Lman2	1	21.8899	21.7386	21.5021	21.906	23.0136	22.347	22.1736	22.473	21.2157	22.2751	22.1468	21.1016	21.5785	22.2323	NA	22.2017	22.1426	21.8238	22.3741	21.6442	22.0252	21.256	NA	NA	21.9216	22.02	22.186	21.9901	21.8786	21.8834	21.9486	22.4726	21.4742	22.0323	22.05	21.6854	22.079	21.832	21.5122	21.5912	NA	NA	21.8291	21.5286	21.2052	21.747
P48678	750	Lmna	1	25.7673	25.7801	26.7631	25.3038	25.6827	25.4063	25.7325	25.3203	26.1503	25.948	25.653	25.2996	24.7905	25.1026	24.7294	25.5352	25.9033	25.6576	26.042	25.9834	25.557	25.6159	25.3503	24.6027	25.4426	25.5942	26.1572	26.3314	25.7407	24.8752	25.4448	25.1665	24.7606	24.955	25.6896	25.8348	25.4292	26.3002	25.7237	25.8975	25.5144	25.2879	25.3562	26.9037	26.6517	26.5029
P14733	396	Lmnb1	1	23.9057	23.3592	24.1777	23.5003	NA	NA	23.7366	23.2239	24.2189	23.0824	23.2609	24.1893	24.0821	23.2997	24.1875	23.2913	23.8623	23.8682	23.5681	24.2292	24.0957	23.5099	23.7803	24.0083	23.8009	23.5276	23.7279	23.9177	23.3683	23.5418	23.5191	23.68	24.4333	23.3913	23.7859	23.6898	23.3573	23.9626	23.7253	23.536	23.5374	NA	23.3855	23.6859	23.7844	23.7547
Q8CGK3	139	Lonp1	1	22.8346	23.9542	22.9819	23.2198	NA	NA	22.8326	23.5376	23.2822	23.463	23.6182	22.7242	22.6131	23.1557	NA	22.6668	23.2556	23.5771	22.9694	24.2409	23.4713	22.8452	23.1886	NA	23.1375	22.4867	23.5109	23.2873	23.8439	23.0121	23.0679	23.4774	NA	22.6451	23.3731	24.0471	23.5434	23.3823	22.6857	23.1547	23.9811	NA	23.1604	23.3119	23.971	23.5588
Q91ZX7	103	Lrp1	1	21.744	23.0412	22.5986	22.3794	NA	NA	22.6856	22.6942	22.3996	22.8023	22.1952	22.094	NA	22.581	NA	23.2345	22.6163	21.7434	22.1801	22.3066	22.277	21.7283	NA	NA	22.3085	21.7558	22.2855	21.763	22.2422	22.0866	22.348	NA	NA	22.8428	22.0334	22.1303	22.3454	22.2788	22.6749	22.7791	23.0672	22.6932	22.9596	22.9371	22.2187	22.2887
P55302	45	Lrpap1	1	21.5653	NA	22.1948	NA	NA	NA	NA	NA	21.8453	21.627	21.3857	21.4358	21.7029	NA	NA	21.8431	22.6501	21.3219	21.1063	21.5466	22.0478	21.7391	NA	NA	21.5409	20.8597	21.4266	20.5675	21.513	21.4147	21.3422	NA	NA	NA	20.7809	21.3357	NA	NA	22.7299	22.6236	NA	NA	21.9793	NA	21.2059	21.8355
Q6PB66	74	Lrpprc	1	21.5779	23.4765	23.057	23.2792	NA	NA	23.35	23.3241	22.8896	21.8797	21.6971	22.3331	NA	21.966	NA	21.7868	22.5601	21.3874	22.0408	22.65	22.9024	22.4198	22.1455	NA	22.821	22.4997	22.3048	22.7871	21.8432	21.4525	22.6735	23.5351	22.8189	21.9375	22.1361	22.2769	21.7632	22.1087	22.1523	22.9344	22.5787	23.1619	22.3389	22.5754	22.3828	21.9052
Q922Q8	230	Lrrc59	1	24.9331	25.2518	24.9462	24.9941	24.7772	NA	24.9448	24.4884	25.0028	25.0632	25.0157	24.03	24.3521	25.6463	24.3927	25.2393	24.7525	25.3239	24.4371	25.4593	25.2642	25.041	25.581	25.363	25.3809	25.2028	25.4528	25.3605	25.7866	25.5897	25.0715	25.1929	24.8351	25.3046	24.3325	25.6456	25.8498	25.7684	24.8505	25.2491	25.4648	25.6008	25.3677	25.2318	25.2115	25.4095
Q7TNC4	47	Luc7l2	1	21.8785	22.6447	22.1484	NA	NA	NA	22.3934	23.2496	22.5561	NA	21.3114	21.0818	21.911	21.3881	NA	21.3112	21.0434	21.5187	21.3972	22.0422	21.6562	21.4796	21.5773	21.7868	21.2681	21.5589	21.8884	21.6287	20.1241	21.3177	20.9868	21.7162	21.4671	21.3832	20.8534	21.3357	21.1266	21.5254	21.027	20.905	22.2813	NA	21.3292	20.9819	22.0483	21.3723
P24668	55	M6pr	1	21.8934	20.846	21.0629	21.4669	NA	NA	21.4572	20.8304	21.423	21.1136	22.2955	22.0236	NA	NA	NA	22.4004	22.2072	25.6471	NA	21.8444	21.7379	20.9641	21.0639	NA	20.8574	21.8827	21.3571	21.3853	20.8102	21.7799	NA	NA	NA	21.3454	21.1266	21.9033	21.3585	23.0959	22.8343	22.7343	NA	23.034	22.7618	22.519	22.9661	22.4179
Q9QZQ8	69	Macroh2a1	1	22.2871	22.9993	23.2023	22.3185	22.8248	NA	22.0659	22.5173	21.9838	22.8989	NA	NA	NA	NA	NA	NA	NA	NA	NA	23.1063	22.2504	22.6083	22.565	NA	22.754	22.378	22.9772	22.3108	23.4626	21.4908	22.2177	23.3511	NA	22.4687	22.9554	23.6405	23.2111	23.2996	22.6734	22.2613	22.9194	NA	22.7106	23.0456	22.7719	22.8776
P61327	48	Magoh	1	21.8673	21.8547	22.58	22.3144	NA	NA	22.1377	21.9071	22.421	21.6782	22.3353	21.9286	NA	22.1689	NA	22.4603	22.9465	21.9455	22.4398	22.3881	22.0937	22.2267	22.25	NA	21.4978	22.1388	22.0525	22.1384	21.6236	22.6576	22.9067	NA	NA	21.8439	22.2165	21.8106	21.9233	22.8475	22.8678	22.6852	NA	22.5605	22.2184	21.9547	22.584	22.1982
Q9CXI5	60	Manf	1	22.5471	22.0707	22.9677	22.1979	NA	NA	22.0785	21.982	22.1752	21.85	23.2849	22.0927	22.426	22.8939	22.313	22.001	21.3637	22.4526	23.0422	22.4597	22.5953	22.9237	21.6815	NA	22.5883	22.7092	23.4029	22.3318	23.238	22.4	21.8643	22.5431	NA	21.9924	21.7242	23.245	23.0851	22.1978	21.9469	22.6362	22.3405	NA	21.8632	21.7665	23.8049	23.5883
Q64133	86	Maoa	1	22.6628	22.2021	22.2564	22.8217	NA	NA	22.1724	22.4835	22.0597	22.6948	23.3172	23.1801	NA	22.9838	NA	22.7313	22.4622	22.5128	22.2549	22.2972	23.1813	23.3181	21.9636	22.4681	23.1435	22.6106	22.3038	21.9758	23.0702	NA	23.2671	NA	NA	22.6523	23.1425	23.5173	23.4367	22.2007	22.4837	22.4529	22.9952	NA	22.8845	23.9443	22.6737	23.6038
P31938	28	Map2k1	1	21.4534	21.459	21.3299	20.3993	NA	NA	22.2665	20.0539	21.3448	21.818	21.0987	21.3221	NA	21.1099	NA	21.171	21.2182	21.4618	20.4664	20.5038	20.6744	21.2974	21.3623	21.7234	20.8447	21.3152	21.7377	21.0477	NA	NA	NA	NA	NA	NA	NA	NA	NA	21.651	20.9045	21.6845	NA	NA	21.4239	20.8338	22.5654	22.3063
P27546	193	Map4	1	25.1323	25.1458	25.4831	25.1803	25.5094	NA	24.8214	25.2204	24.8348	25.1415	25.8134	25.0022	25.5339	25.5609	NA	25.3831	24.8368	25.5417	25.5022	25.2043	25.3598	25.7486	24.953	NA	25.4564	25.1378	25.5835	25.3754	25.085	25.5058	25.383	NA	25.2575	25.5853	25.6661	25.4142	25.5414	25.3897	24.9425	25.2466	NA	NA	25.4377	25.5831	25.6133	25.6656
P63085	33	Mapk1	1	21.3969	21.8441	21.2608	22.2756	NA	NA	22.027	21.0989	22.1037	22.7369	22.4219	21.8566	NA	NA	NA	21.5099	21.7102	22.1877	21.363	NA	21.7819	22.1703	NA	NA	22.0847	21.6014	21.2756	NA	21.7116	20.9062	21.6915	NA	NA	21.7451	21.4777	21.8327	21.3807	22.2469	22.9529	22.8167	NA	NA	21.7826	NA	22.2067	21.5359
Q61166	85	Mapre1	1	23.2986	23.7538	23.6104	23.6981	22.7611	NA	23.2812	23.3787	23.6251	23.3956	23.8464	23.5596	NA	24.0772	NA	24.0144	23.6959	24.0494	23.4278	NA	23.0645	22.4989	22.8883	NA	23.0729	23.3516	23.5201	23.0295	23.3456	22.8901	24.2954	NA	NA	22.5333	22.5294	24.0328	23.8496	23.1622	23.5458	23.6481	24.0953	NA	23.9351	23.0927	24.3874	24.4655
P26645	198	Marcks	1	25.4736	25.4762	25.3826	25.2253	25.8292	25.5196	26.2838	25.6263	25.1487	26.1563	25.7616	24.3857	24.6872	24.3497	NA	24.7737	24.5429	25.2211	24.4774	25.6879	25.2991	24.9677	24.7853	24.9281	25.0148	26.0984	25.8826	25.2645	26.168	25.3945	24.616	24.7553	24.54	25.2015	25.5605	25.7684	25.6795	24.6544	24.7224	24.6845	24.0613	24.1237	25.405	25.9148	24.9938	25.6546
P28667	42	Marcksl1	1	21.8228	21.7444	21.3202	21.2684	NA	22.6731	22.1501	22.4464	21.0533	21.2538	21.6418	21.3327	21.8932	23.3689	23.1938	21.7757	22.1861	21.9183	21.0674	NA	NA	NA	22.0875	21.883	21.4776	21.9336	20.7106	20.6887	21.3646	21.6603	22.1566	NA	NA	21.9076	22.735	21.9028	21.7646	NA	20.2486	20.938	22.2535	22.4265	21.4199	22.3669	20.5683	20.0577
Q8K310	191	Matr3	1	23.2357	24.2546	23.4954	23.6387	NA	NA	23.6663	23.6895	23.8017	23.0927	23.4517	24.4491	23.6954	23.7488	NA	23.7255	23.6861	24.2459	24.1795	23.5166	24.0825	23.5564	23.4605	23.2905	23.6155	23.4176	23.8474	23.6978	23.7333	24.4399	23.76	23.6552	23.6433	24.1196	23.8166	24.178	23.7074	24.1482	24.1768	24.0527	24.1871	23.1032	24.2381	24.0398	24.0119	23.8449
P97310	130	Mcm2	1	22.4754	23.4497	23.1443	23.5853	NA	NA	22.6898	23.1169	22.9915	22.8435	22.2828	23.6479	23.3588	23.3082	23.169	22.8074	22.9955	22.6862	23.0884	23.4515	23.6298	22.9567	23.8392	23.0435	23.0333	23.2269	22.9049	23.3718	22.2477	22.9816	23.2847	NA	NA	22.82	23.009	22.2699	22.3118	22.6676	22.8017	23.1692	23.1893	23.2142	22.8173	22.9517	22.2042	22.4512
P25206	194	Mcm3	1	22.8643	23.5128	23.0721	23.7578	23.3948	NA	23.905	23.6453	23.3015	22.6483	23.0231	23.9047	24.1896	23.4472	23.497	23.7631	23.4172	23.0527	23.1383	22.8743	23.4172	22.9387	23.8523	NA	23.9009	23.5671	22.6374	22.8661	22.6248	23.39	23.118	23.0537	22.8308	23.817	23.3845	22.8596	22.6781	22.9525	23.0649	23.2674	NA	NA	23.486	24.1121	22.6914	23.3739
P49717	143	Mcm4	1	22.8822	23.5035	23.3434	23.9883	24.171	22.9962	23.4123	23.8301	23.5003	23.2203	22.4616	23.7287	23.7481	23.2185	NA	22.776	23.3182	23.153	23.1511	22.8213	24.0948	23.0815	22.9748	23.2453	23.2325	23.6287	23.0776	23.0159	22.792	23.4887	23.679	22.6572	22.7978	23.312	23.8927	22.9689	22.8418	23.2654	23.2982	23.6134	NA	NA	23.8887	23.6083	22.8009	23.048
P49718	51	Mcm5	1	21.6104	23.2477	22.3488	22.7497	NA	NA	22.2194	22.5424	23.3571	22.2393	21.0103	22.308	NA	21.0652	NA	22.4037	22.0812	21.9408	21.253	NA	22.5388	21.3626	NA	NA	21.3308	22.3789	22.5907	21.5427	21.4113	21.7197	21.497	NA	21.6814	22.4097	22.4849	21.5203	21.3409	21.9649	21.2222	22.4498	NA	NA	23.143	22.3303	22.2682	22.0004
P97311	170	Mcm6	1	23.2848	23.767	23.5078	24.0795	NA	24.2907	24.1311	24.1834	23.5433	23.1231	22.9833	23.9321	23.5269	23.3761	NA	23.1944	23.2164	23.1635	22.8955	23.5061	23.9721	23.3346	23.9566	23.2537	24.0436	23.9109	23.4559	23.3835	22.7773	23.7811	22.7076	23.1451	23.8524	23.7088	23.9963	23.1519	22.7878	23.2209	23.6881	23.8356	NA	23.8183	23.5739	23.8495	22.5498	23.2162
Q61881	183	Mcm7	1	23.024	23.1506	23.1885	23.5192	NA	NA	23.4607	23.5097	23.3653	22.6026	22.4908	23.6655	23.7885	22.9986	NA	23.3956	23.0141	22.8966	22.4252	23.3639	23.8249	23.191	23.2279	22.9588	23.627	23.8752	22.8904	23.2812	22.2779	23.3084	23.3898	23.0454	22.9408	23.7137	23.6487	22.8948	22.5805	22.8802	23.3599	23.2024	22.3382	22.6575	23.6537	23.1416	21.9799	22.3888
P14152	198	Mdh1	1	23.9122	22.7228	23.1706	23.4161	24.0926	NA	23.2859	24.7539	22.8419	22.6298	22.4333	22.5888	24.5205	23.8811	24.1111	23.0775	22.8855	22.2259	22.5274	23.2802	23.7627	23.3282	23.4056	23.7408	23.4032	23.3131	23.1422	22.4997	22.8856	22.6776	22.3203	24.6922	NA	22.6185	22.9811	22.8366	22.7836	NA	22.5692	22.5785	NA	NA	22.9841	23.6152	22.8903	22.8069
P08249	404	Mdh2	1	26.1295	25.4966	25.5346	25.7337	NA	NA	25.9001	25.1198	25.7633	25.7848	25.2969	25.5522	25.7082	24.7635	25.9279	25.4614	26.4979	25.5342	25.6495	26.3098	26.2704	25.5275	25.5004	25.6825	25.7571	25.2636	25.154	25.4964	25.4059	25.3218	25.7259	25.8536	25.7428	25.1645	25.8822	25.6195	25.7881	25.1523	26.0987	25.5767	26.0349	25.0059	26.0964	26.1108	25.6022	25.6531
P06801	40	Me1	1	20.9475	21.51	21.2696	21.4734	21.3645	NA	20.5689	21.6461	21.1886	20.4279	21.2569	21.2752	NA	21.58	NA	21.8877	21.3812	20.9323	21.7233	NA	20.4302	21.2301	21.7945	NA	22.1529	20.0734	20.6007	20.5114	NA	NA	NA	NA	NA	NA	NA	NA	NA	20.8846	20.8992	21.3545	NA	21.8041	21.5287	22.398	21.4552	21.675
Q9ERE7	60	Mesd	1	22.627	23.9762	24.3055	NA	NA	NA	NA	NA	23.6838	NA	23.9817	23.2278	NA	NA	NA	NA	NA	NA	NA	23.2735	22.5877	22.3063	22.4165	22.3353	22.3907	22.5857	23.1593	23.0166	NA	NA	NA	NA	NA	NA	NA	23.918	24.2782	22.755	22.1506	22.9967	NA	22.4002	22.1902	22.2561	23.2987	23.0159
P34884	118	Mif	1	25.4137	22.4495	23.3707	23.1724	23.9894	NA	24.6288	24.7549	22.6035	24.2815	22.6765	23.6831	25.2748	22.6283	24.1536	23.1518	25.0187	23.0338	22.1014	23.4811	23.6404	24.2785	24.0198	23.9722	23.1641	23.2133	24.7914	23.8929	24.3174	24.3993	24.0662	24.9944	25.3867	24.6372	24.4847	24.012	25.1717	22.9258	23.4335	21.6987	24.1174	23.935	23.4582	23.9268	23.1977	23.2815
Q6ZQI3	53	Mlec	1	21.7508	20.998	21.0713	21.2353	NA	23.0008	21.0805	21.6612	20.873	20.6741	21.4018	21.7839	NA	22.142	NA	22.0484	22.4672	21.7094	22.0228	NA	20.9244	21.3753	NA	NA	21.0543	21.4427	21.0529	20.8097	21	21.8708	21.3567	22.4211	22.1325	21.145	21.2961	21.0581	21.033	NA	NA	20.9946	NA	NA	21.3149	NA	21.6664	20.1397
P0DOV1	20	Mnda	0.9997	21.0626	21.4244	22.203	21.7781	NA	NA	21.6991	21.9071	21.1524	19.7636	21.5273	22.5497	23.1253	21.4159	22.2217	22.8822	22.4987	21.399	20.6323	22.2102	22.3061	22.6222	21.222	21.839	22.6131	23.3478	20.9189	21.2065	20.9017	22.3958	22.0466	21.3073	21.9055	22.3055	22.29	20.8297	19.9927	NA	NA	NA	NA	NA	NA	NA	NA	NA
P97434	33	Mprip	1	22.5713	23.5538	23.295	22.8002	NA	NA	NA	22.9161	22.8626	23.6496	22.6493	22.9712	NA	NA	22.4216	NA	23.25	22.6524	21.3132	NA	NA	23.2256	NA	NA	23.6916	22.7806	23.4059	24.1347	23.2147	23.0957	22.7493	NA	NA	23.0354	23.1651	23.2857	22.4755	23.0821	23.2949	22.7335	NA	NA	23.5275	22.9747	23.7632	23.5792
Q99J99	34	Mpst	1	20.7163	20.914	20.7499	20.235	NA	NA	21.7689	20.5289	20.8994	20.8402	21.2043	21.4285	NA	22.5526	NA	20.2187	20.9983	21.3481	20.4988	21.4646	21.3252	21.9288	21.644	NA	21.2245	21.1001	21.4321	21.3011	NA	NA	NA	NA	NA	NA	NA	NA	NA	NA	NA	NA	NA	NA	NA	NA	NA	NA
Q9DB15	47	Mrpl12	1	22.1763	20.9104	20.4847	21.4135	NA	NA	21.8173	21.7577	21.4022	NA	22.0425	21.6951	NA	NA	NA	21.6593	21.7905	21.1795	20.7915	23.1039	22.0118	21.3838	21.951	NA	21.3983	22.0119	22.2522	23.0093	23.1121	23.4113	22.9993	24.1423	24.0423	22.3525	22.7991	22.8909	23.3003	22.5575	21.6686	21.7597	NA	NA	21.4999	22.1846	21.8114	22.2651
P26041	348	Msn	1	24.5626	24.0446	24.1954	23.9588	NA	NA	23.3794	23.9082	23.8419	24.1319	24.3449	24.2127	23.7946	23.9662	23.7818	23.9901	24.438	23.9479	23.9055	23.6069	24.287	24.6299	24.1943	25.0693	23.8333	23.5959	24.0629	23.8762	24.7499	24.6389	24.5511	23.9468	23.6242	24.1058	24.8419	24.4917	24.9879	24.4721	25.0964	24.1582	24.9398	NA	24.4226	24.5736	24.4751	24.904
Q9CQ65	94	Mtap	1	22.7841	22.8027	21.7974	21.9559	NA	NA	22.8516	22.4535	22.3114	22.6203	21.5634	21.8667	22.6267	22.3383	NA	22.0328	22.4756	22.557	22.1521	22.6942	22.4435	22.8815	23.6111	NA	22.3616	22.1729	22.1778	22.4743	22.7762	23.0883	23.3836	23.8788	NA	23.1543	22.7454	22.8455	23.4489	NA	22.3664	22.4181	NA	NA	23.3477	23.8399	NA	22.511
P00405	39	Mtco2	0.9999	22.5909	21.2913	21.5869	21.1017	NA	NA	21.6287	21.4494	21.6054	21.9854	22.0967	22.3789	NA	22.4592	NA	22.9128	22.3388	21.9922	21.8882	22.4667	21.4609	21.5261	21.7396	NA	22.0588	21.8538	21.4444	22.1537	22.2094	22.266	22.8099	23.7588	NA	21.5981	22.2558	21.9687	21.714	NA	NA	NA	NA	NA	NA	NA	NA	NA
Q80WJ7	68	Mtdh	1	21.8513	21.4885	22.5506	21.81	NA	NA	22.1369	21.9	22.3589	21.9857	21.5426	21.7661	NA	22.7026	NA	21.2963	21.9795	21.0884	21.759	20.5255	22.2387	22.393	22.2188	NA	21.7414	21.971	21.8654	22.1248	22.4766	23.4096	22.546	23.8	NA	22.2107	21.7031	21.9397	22.3463	22.4493	23.1827	22.0461	23.2292	NA	22.1442	22.4046	21.5723	22.1114
Q922D8	80	Mthfd1	1	22.3172	22.6538	22.8067	22.3233	24.1391	NA	22.3553	22.4958	23.0132	22.6926	22.2616	22.8343	23.5354	NA	23.2052	22.922	22.4822	22.4782	22.0178	22.8521	22.1378	22.5822	22.5368	NA	21.988	22.094	22.2545	21.9962	22.7714	22.8585	22.7777	NA	22.9597	23.2824	22.7758	22.5436	22.4738	22.8987	22.8665	22.4581	NA	NA	22.6307	22.8644	22.2356	22.6705
Q3V3R1	54	Mthfd1l	1	21.1983	22.1722	21.8604	21.2465	NA	NA	22.7578	22.3145	21.999	21.832	21.3087	21.0102	21.4067	21.8343	21.9149	20.849	21.1468	21.3051	21.9449	22.2452	22.0897	21.8317	22.2772	21.9222	21.5927	20.9585	21.5415	21.3319	22.2721	NA	NA	NA	NA	21.5972	21.5735	22.0403	22.1159	22.5775	22.4651	21.7577	22.5175	22.0472	22.4021	23.0369	22.0515	21.9028
Q9JLN9	19	Mtor	0.9999	20.8471	20.9999	20.914	21.7644	NA	NA	21.8439	21.3633	20.7677	21.8115	21.2216	21.6178	21.9669	NA	NA	22.1416	22.2822	20.9687	21.6172	21.1025	21.3515	21.5049	NA	NA	21.889	20.9813	19.733	21.2219	21.4334	21.1817	21.0641	21.4906	20.9635	20.0749	21.3496	19.89	21.1972	20.4691	22.1357	20.5737	NA	21.9088	21.8301	21.7266	20.1088	21.0053
P62774	80	Mtpn	1	23.7102	22.7364	22.5095	22.2826	NA	NA	22.614	22.5133	22.3569	22.5263	21.3784	21.8106	NA	NA	22.766	21.3911	22.9205	22.2758	21.5477	NA	20.8241	23.9129	23.8418	NA	23.2281	23.1633	22.0569	22.0039	21.7499	24.4235	22.0894	NA	NA	NA	21.6657	21.9829	21.6882	21.5226	20.5902	22.6422	NA	NA	23.1395	22.3256	23.3713	23.1873
Q9EQK5	106	Mvp	1	21.8704	22.0836	22.7817	22.553	NA	NA	22.4976	22.4739	21.8749	22.1216	21.5971	21.2109	22.4429	22.1083	NA	21.7468	21.8912	21.4356	21.3485	NA	21.8308	21.381	22.5977	NA	21.9902	22.0872	21.919	21.6246	22.1666	22.5261	22.3311	23.1127	NA	22.5108	22.1662	21.7713	22.0496	21.707	20.8967	21.5649	22.875	NA	22.3438	21.9942	21.7555	21.7007
O35682	61	Myadm	1	22.4635	22.6153	21.9365	22.3452	NA	NA	23.4981	22.0606	21.0213	22.1716	23.7675	23.5902	24.1724	NA	24.1321	23.3397	23.3629	23.0392	22.7176	22.4104	23.0324	22.1427	22.4544	NA	22.2454	22.1653	21.6123	22.0313	21.9115	23.0946	21.9467	21.696	NA	22.4619	22.7223	21.8107	22.4953	21.5754	23.1214	22.7204	22.1795	21.734	22.0865	22.6425	22.3896	22.1943
Q7TPV4	267	Mybbp1a	1	23.062	23.5609	23.9156	23.2886	NA	NA	23.6891	23.4715	24.0803	22.9146	23.608	23.1414	24.2964	22.757	NA	23.5841	23.4659	23.3585	23.6933	24.1335	23.3709	24.1476	23.6199	24.7212	23.5264	23.4223	24.291	24.1399	23.0551	23.2589	23.132	23.8649	23.4335	22.7955	23.2468	23.9462	23.3255	23.9894	23.6807	23.8539	24.3391	NA	23.5582	23.466	24.0953	23.613
Q9CPT4	42	Mydgf	1	21.5739	19.9704	20.0005	19.9675	NA	NA	20.276	19.2426	19.196	19.3732	21.7246	21.0127	22.08	21.9723	NA	22.881	NA	22.1195	21.331	22.5113	22.1594	23.039	NA	NA	22.652	22.6391	21.2331	22.3632	20.3087	19.6602	19.9049	NA	NA	20.2782	19.2631	19.6734	19.8323	21.2175	20.6809	20.4841	NA	20.9945	20.671	22.1024	20.7386	20.8891
Q8C854	53	Myef2	1	21.5652	22.2284	22.3035	22.1751	NA	NA	22.0353	22.1222	22.3169	22.4179	21.5004	21.7349	NA	20.9343	21.6337	22.2852	22.003	22.5253	22.3883	NA	21.8107	22.0506	23.2866	NA	22.6234	21.8936	22.7031	22.6207	22.1421	22.2525	22.2821	NA	NA	NA	22.2326	21.6363	21.8701	23.1832	21.8293	22.4242	NA	NA	22.9804	21.924	22.824	22.59
Q61879	784	Myh10	1	24.3187	24.3657	24.3252	24.0009	24.4656	NA	24.1074	24.3407	24.2018	24.616	24.8869	24.3245	24.6613	24.2906	23.5435	23.5648	24.0806	24.6555	24.2951	24.4406	24.1722	23.9921	24.2457	24.5313	24.0898	24.1571	24.718	24.3121	25.3647	24.3072	24.2444	24.409	24.3187	24.1146	24.5073	24.4422	25.274	24.0909	23.8818	23.6431	24.604	23.8786	23.8877	24.1854	24.7333	24.9593
Q8VDD5	2506	Myh9	1	27.3226	27.2412	27.0218	26.5869	27.1815	26.2057	26.5768	26.8634	27.1958	27.4374	27.9409	27.3827	26.6684	27.2709	26.6486	27.0009	26.9218	27.6779	27.8143	27.4079	26.623	26.7371	27.0575	26.7035	26.5281	26.667	27.6742	27.1194	27.8083	27.3384	27.1565	26.5699	26.8748	27.0004	27.4315	27.7986	27.8742	27.3839	26.9316	27.025	26.6263	26.5949	26.6195	27.109	27.5621	27.6119
Q3THE2	242	Myl12b	1	25.9205	26.279	25.9806	25.717	25.981	NA	25.4503	25.9381	26.1677	26.6678	27.3639	26.5158	25.0187	26.4399	25.2279	25.6908	25.3501	26.7342	26.9785	26.0104	25.9017	25.48	25.8443	25.1467	25.6359	25.0503	26.1543	25.7328	27.2323	26.2169	25.9227	25.7726	24.7512	26.1	26.192	26.8773	27.2909	25.8695	25.9096	25.9855	24.8051	24.6858	25.9844	25.7937	27.0878	27.4543
Q60605	287	Myl6	1	26.6683	26.3259	26.3083	25.8265	26.3712	25.7127	24.8937	26.2074	26.0521	26.6487	27.0423	25.9469	25.5041	26.1401	NA	25.7966	25.5394	26.9758	26.826	26.4613	25.5846	25.7674	26.2713	25.3996	25.392	25.8879	26.8682	26.3591	27.1105	26.5768	26.2207	25.8685	25.3199	26.3163	26.5691	27.1313	27.3217	26.9361	25.8728	25.8222	25.4208	NA	25.6507	26.1191	26.9049	27.1078
Q9WTI7	218	Myo1c	1	23.0987	24.0375	23.5169	23.5202	23.7131	NA	23.455	23.2948	23.5805	23.5832	23.6067	23.8302	23.9306	22.9592	23.1162	22.5329	23.398	23.2676	23.4716	23.4903	23.3824	23.1392	22.6399	NA	23.1709	23.2267	23.2376	23.5742	23.2542	23.6502	22.9752	23.4459	23.8507	23.2896	23.1161	23.345	23.5637	23.6725	22.9523	23.4803	23.2476	23.5333	23.1184	23.0257	23.1557	23.6339
Q69ZN7	311	Myof	1	22.9982	22.8596	22.6948	23.2888	NA	NA	23.1487	22.8679	22.6734	23.0766	22.9961	22.9838	23.622	23.3684	NA	23.2482	23.0293	23.2169	23.4059	23.5901	22.5049	22.6418	23.2336	22.7102	22.318	22.5453	22.5936	22.9555	22.6314	23.1458	23.4236	23.3068	NA	23.3018	22.5687	22.7611	23.1116	22.7713	22.4574	22.5413	NA	NA	22.7443	22.6833	23.0057	22.792
P70670	62	Naca	1	23.8416	24.6768	24.4971	24.836	23.1862	NA	24.0256	24.8694	24.5148	24.7068	23.0535	22.703	NA	NA	24.6038	23.2228	23.5901	22.5104	23.3965	24.0344	23.2022	23.6002	24.4035	NA	23.7426	23.2909	23.2712	23.5205	23.4273	23.09	23.3683	22.9443	NA	23.7461	22.7227	23.4751	23.0254	23.1606	22.1998	22.9616	NA	23.485	23.219	23.098	22.9898	23.329
Q99J77	30	Nans	1	21.801	19.8672	20.6116	20.2936	NA	NA	19.9271	20.53	20.5044	21.3221	21.316	21.1703	NA	NA	NA	21.8576	21.4666	21.5539	21.178	NA	22.0567	20.6378	NA	NA	21.381	21.3085	20.3033	20.7121	21.5029	20.7485	21.3629	NA	21.2819	21.2258	21.0046	21.167	21.3001	NA	NA	NA	NA	NA	NA	NA	NA	NA
P28656	73	Nap1l1	1	23.3787	23.1809	22.32	23.179	NA	NA	NA	23.3792	23.6385	23.0427	23.7921	22.2864	23.6284	NA	NA	23.7022	23.4777	23.0055	22.5709	22.9729	23.0554	23.2127	23.2427	24.316	22.4025	22.8693	22.9202	23.3211	23.4127	22.2792	22.7796	NA	22.8684	22.9117	23.1345	23.3649	23.152	22.967	22.8814	22.9733	24.1373	23.9806	23.5808	23.0943	23.0604	22.9161
Q9DB05	62	Napa	1	22.1373	21.6537	21.3111	21.4253	NA	NA	NA	20.6129	21.1519	20.6522	21.6644	21.394	22.9097	22.3979	NA	22.6344	21.7575	21.5727	21.9193	NA	22.3079	NA	21.5025	21.9695	NA	21.501	20.5841	21.0425	21.9542	21.5398	21.9278	NA	NA	21.4411	NA	21.6049	21.4686	21.6549	22.2927	22.4559	NA	NA	21.9352	21.5095	21.8958	21.1181
Q8BP47	166	Nars1	1	23.8857	23.6132	23.3664	23.5951	NA	NA	23.2294	23.5472	23.3982	23.1177	24.2108	23.9798	23.4906	23.7846	NA	23.6805	23.8753	23.5795	24.0041	22.7393	23.4582	23.774	23.6042	NA	23.4157	23.7197	23.9177	23.8847	23.7947	23.5339	23.8652	NA	23.2899	23.6193	23.7684	24.2249	23.9002	24.0716	23.5957	24.1515	24.3144	22.6291	24.2535	23.3669	23.8469	23.9838
Q99MD9	99	Nasp	1	22.8137	22.4379	22.3508	22.2605	NA	NA	23.0975	22.1596	22.3449	22.1934	22.0254	NA	NA	NA	NA	22.9604	NA	22.4403	NA	21.2044	21.9083	21.8299	21.587	NA	21.6359	22.6117	22.1898	22.0207	21.9843	22.7375	22.5225	NA	NA	22.3737	21.5101	22.2844	22.1667	21.8909	21.8749	21.0641	NA	NA	22.4728	21.6726	22.162	21.9482
P13595	82	Ncam1	1	22.3119	21.8161	21.9578	22.2248	NA	NA	NA	21.8109	22.4254	23.1081	21.5659	22.7243	23.3511	NA	NA	23.3791	23.2409	22.2259	22.2568	22.204	20.9652	23.8359	NA	22.7927	21.6608	22.4551	21.7724	21.9237	21.4712	21.9041	22.0703	NA	NA	NA	21.5917	22.5411	22.2642	22.9905	NA	NA	NA	NA	22.9567	23.1103	22.1959	22.6792
Q3UYV9	26	Ncbp1	1	19.9968	22.3768	21.4629	21.9587	NA	NA	NA	22.7368	21.1428	21.487	NA	20.6913	NA	NA	NA	20.497	21.3954	20.4863	NA	21.4666	22.597	21.5865	20.9479	NA	NA	21.5663	21.0692	20.0555	20.9043	NA	22.3609	NA	NA	21.6063	21.766	20.8865	21.0834	20.4855	NA	21.694	NA	NA	20.9236	21.0533	20.0115	20.0058
P09405	840	Ncl	1	26.3357	26.709	27.1499	26.5064	26.0684	26.0559	26.1854	26.7395	26.8921	26.1717	26.2485	26.531	24.7937	25.4864	25.1485	25.7506	25.535	25.6594	25.9313	26.947	26.6601	26.3056	25.9291	25.292	25.9201	26.5724	26.1108	26.7591	25.9887	26.752	25.9759	26.1111	25.2043	25.8856	26.2858	26.4984	25.9573	26.4518	26.5138	26.7636	26.2554	25.2865	25.9371	26.124	26.5867	26.186
Q62433	32	Ndrg1	1	21.5379	21.9964	22.6569	21.9463	NA	NA	20.9671	22.5075	21.9615	22.0035	21.3517	21.6892	NA	20.9166	NA	21.1959	22.3584	21.198	20.5872	NA	21.1612	20.7677	NA	21.3776	20.9625	21.1946	21.3633	21.4281	21.5617	20.8909	21.7727	NA	NA	21.7853	20.3177	21.2998	21.1911	20.6917	21.3849	20.5358	NA	NA	21.5015	21.6631	21.2916	20.7935
Q62425	72	Ndufa4	1	22.4214	22.1964	22.7594	21.9196	NA	NA	22.0459	20.7548	22.7021	23.5006	22.9192	23.0646	NA	22.576	NA	22.1827	23.0213	23.5679	23.4275	23.4069	21.1872	21.6198	21.761	22.1612	21.2567	21.1108	23.0957	23.4373	23.1613	22.4245	22.5974	NA	NA	22.0472	22.7371	23.9386	23.3309	23.1452	22.4899	21.9793	22.9685	NA	22.2219	22.3206	23.8334	23.7087
Q9CR21	24	Ndufab1	1	21.7538	NA	21.0062	20.337	NA	NA	21.7719	20.8142	21.3296	20.5255	21.4356	20.6273	NA	NA	NA	20.8519	NA	21.6204	21.7537	21.4582	20.5361	19.9905	NA	NA	20.7725	20.9235	21.1405	21.8703	20.9055	21.1395	20.533	NA	NA	21.2531	20.0401	21.6928	22.0052	NA	21.1947	20.3183	NA	NA	20.8547	NA	21.4441	21.552
P46935	98	Nedd4	1	22.4819	21.8965	21.3447	21.7099	NA	NA	23.3339	22.6584	22.6521	22.8631	22.4451	22.4014	NA	22.9881	NA	22.9961	23.1904	22.2493	23.4263	NA	20.7848	21.7412	22.3674	NA	21.5529	21.867	22.2018	22.0858	21.9592	22.1206	22.2287	NA	NA	22.3347	22.5535	22.3512	22.5115	22.1511	22.4532	22.0639	NA	22.1979	22.6116	22.4558	22.8044	22.4422
P70441	147	Nherf1	1	23.1858	23.2234	23.1272	23.5828	23.5234	NA	22.8188	22.4874	23.4361	23.1447	24.1336	24.6737	22.8821	23.4698	23.9725	23.3216	22.9461	23.5707	23.1941	22.7729	22.8545	22.9669	23.0235	NA	23.6638	23.085	23.0697	23.6093	23.1272	24.2501	22.9735	NA	23.0055	22.7093	23.2715	23.3262	23.1252	23.676	22.7454	23.1775	22.8566	NA	23.2791	22.7336	23.8797	23.5761
Q3UW53	96	Niban1	1	22.2828	23.1749	22.6078	22.9469	NA	NA	22.064	22.5149	22.3718	22.2578	22.4581	22.1632	22.9739	22.0077	NA	23.02	22.969	22.56	21.9784	22.9785	23.064	22.8502	23.0086	22.7267	22.7254	23.7203	22.7207	22.4736	22.3512	22.6664	22.7322	21.503	21.5513	22.8877	22.5804	22.4337	22.8254	22.2121	22.6395	22.9167	NA	21.9852	22.1883	22.4863	22.5456	22.2243
P15532	118	Nme1	1	25.5206	24.0094	24.2574	24.4056	NA	NA	24.0566	23.1453	24.1814	22.9754	23.8244	23.6321	24.248	24.012	NA	23.6848	23.6672	23.0027	23.1303	23.7899	23.4023	22.5539	23.1771	NA	22.8346	23.5281	23.479	23.0598	22.787	22.6142	22.3648	24.4122	NA	23.2399	22.4681	23.6563	22.5516	22.7712	23.136	23.7802	24.0889	24.0692	23.3324	23.0735	23.4869	23.6673
Q01768	278	Nme2	1	26.9616	24.8308	24.4506	25.256	25.2684	NA	24.4399	24.8533	25.7123	24.7512	25.2513	24.8752	24.8878	25.0889	27.4932	24.9038	25.0289	24.7175	24.7564	24.8978	24.6723	24.5573	25.1116	25.0497	24.8254	25.2603	25.0133	25.4352	24.9837	24.9972	24.2616	25.1526	26.1323	24.6137	24.2329	25.3359	24.3777	24.8525	25.4166	25.13	25.0814	25.9641	24.9781	24.6779	25.5169	25.7697
O70310	66	Nmt1	1	21.6444	22.6656	22.6606	22.8482	23.2782	NA	24.716	22.5369	22.2219	22.4062	22.3113	21.5869	21.6275	21.9666	NA	21.4266	22.245	21.818	21.6896	22.7562	NA	22.1659	NA	NA	22.0234	22.6189	22.3716	22.0107	22.2496	21.44	22.2905	NA	NA	22.2802	22.1583	22.5524	22.4507	22.035	22.6659	22.3254	NA	NA	22.229	22.3877	22.3878	22.427
E9Q5C9	56	Nolc1	1	21.85	NA	22.7799	22.8198	NA	NA	23.3535	22.5218	22.4711	23.2364	22.7163	22.8906	NA	22.3569	NA	22.1584	22.5371	22.2664	22.1902	22.2667	22.1102	21.9709	22.932	NA	22.0559	21.4903	20.9926	21.8198	21.9406	22.3004	21.9083	21.9368	NA	22.22	21.9746	22.6059	21.5941	22.0599	21.7473	22.3912	22.5585	21.4709	22.0718	20.8832	22.2816	21.6725
Q6GQT9	41	Nomo1	1	20.6935	19.7062	20.1943	21.3627	NA	NA	20.2115	21.0352	20.3722	20.5565	NA	NA	NA	NA	NA	NA	NA	NA	NA	NA	NA	NA	NA	NA	NA	NA	NA	NA	21.6108	21.3733	21.2105	NA	21.2819	20.7081	21.0104	21.0175	20.5566	21.5191	21.3913	20.9578	NA	NA	21.1805	NA	20.967	20.8335
Q99K48	124	Nono	1	23.4164	23.6758	23.838	22.8974	23.3882	NA	23.3625	23.1619	23.2064	23.7403	23.6311	23.5378	22.6524	23.3484	22.2626	23.3599	23.5955	24.1	23.7059	21.9067	23.4515	23.3534	23.2534	23.5404	22.7447	23.4448	23.6508	23.6998	23.6718	23.3792	23.2793	22.8205	22.7892	23.4375	23.394	23.8212	23.5256	23.4064	23.8629	23.6565	23.2067	23.1713	23.0639	23.7258	24.0874	23.9742
Q922K7	24	Nop2	1	20.1904	21.4335	21.4931	21.2567	NA	NA	20.8361	21.3448	20.9281	20.1293	20.6872	21.1199	NA	20.534	NA	20.3139	19.5888	20.1544	20.3412	21.1212	21.3279	20.4519	20.8465	20.0911	21.3294	20.4768	21.2743	21.5652	20.0898	20.9516	20.9476	NA	21.9582	20.8926	21.243	20.1935	20.6066	21.1159	20.9163	20.5095	20.8371	NA	20.2492	20.1184	20.7512	20.1682
Q9D6Z1	147	Nop56	1	22.8668	23.8276	23.573	23.0326	NA	NA	23.0858	23.5533	23.3769	23.3993	22.9147	22.9146	NA	23.677	NA	22.8827	23.3129	23.1175	23.2987	23.0879	23.1085	22.4767	23.2895	NA	23.1461	23.5242	22.9039	23.6206	23.2282	22.8792	22.8486	23.0487	23.4869	22.9322	23.3589	23.1976	22.5551	23.3471	23.3437	22.5103	23.6402	NA	22.8871	23.017	23.5106	23.2187
Q6DFW4	68	Nop58	1	21.756	21.9045	21.8328	21.6996	NA	NA	22.8034	21.5044	21.2378	21.7907	21.3783	20.9769	NA	NA	NA	21.6717	NA	21.0721	21.5792	22.2383	22.0227	21.5449	NA	NA	21.6556	21.8159	21.5301	21.067	21.783	22.0688	21.5274	NA	NA	21.418	22.4562	21.7986	20.8178	21.9706	21.1062	21.5495	21.6936	NA	22.2561	22.0071	21.4684	21.6955
Q9Z0J0	80	Npc2	1	23.0626	NA	NA	22.195	NA	NA	NA	22.727	22.7249	22.5195	21.1843	21.3451	NA	NA	NA	22.9273	NA	21.5507	21.4685	22.2285	NA	20.8161	NA	NA	NA	21.3339	22.0442	21.2899	21.1508	23.1351	22.8224	NA	NA	22.4457	22.5299	21.7735	21.432	23.6065	21.7679	22.7786	24.1662	24.0041	23.3488	23.1151	22.3444	23.0103
Q61937	184	Npm1	1	25.5292	25.2439	24.4397	24.379	24.7878	NA	24.8491	24.3656	24.6894	24.555	25.6163	25.0921	24.3762	24.899	25.6203	24.8666	24.5952	24.7148	24.5408	25.972	25.1266	24.4629	25.0118	25.3246	24.4118	24.9051	25.4836	26.0535	24.8015	25.0927	24.2276	25.1505	25.6176	24.8493	25.2494	24.7139	24.8031	26.0779	25.3321	25.3484	24.431	26.3104	25.1304	25.5199	25.3572	25.3632
Q9CZ44	80	Nsfl1c	1	22.3602	22.0967	22.9621	22.9778	NA	NA	NA	23.0701	22.9023	22.8412	23.2353	22.4188	NA	NA	NA	23.0005	22.9043	22.468	23.0562	22.3493	22.8387	22.4625	23.5649	22.8174	22.4874	22.1091	22.8282	22.5689	22.8498	22.6914	22.7017	NA	22.4809	23.3981	22.0197	23.6043	23.1539	22.6498	22.2218	21.9065	NA	23.1092	22.7476	22.523	22.629	22.7732
Q02819	51	Nucb1	1	21.5208	21.7328	21.4858	21.9885	NA	22.798	21.7381	21.3996	21.3081	22.3566	21.1861	20.8399	NA	22.1057	NA	21.3021	20.905	21.7999	21.8752	21.1107	21.9419	21.209	21.9723	NA	21.3185	20.8336	20.969	20.9061	20.6584	20.7179	21.2508	22.2401	NA	21.1472	21.4342	20.288	20.8983	20.8628	20.9137	20.9078	NA	NA	21.4012	21.471	21.0986	21.0547
Q80XU3	27	Nucks1	1	20.762	22.4644	21.1257	20.6364	NA	NA	20.5683	21.3398	20.5628	21.4549	21.4365	20.0011	NA	20.9612	NA	20.4102	21.5783	22.232	22.3985	NA	21.094	21.6163	NA	21.7292	22.7039	NA	21.8383	22.0867	21.8748	19.518	22.426	21.3237	NA	19.5915	20.8528	22.1229	22.1244	22.1352	21.0196	20.8236	21.0616	21.0549	20.8376	21.938	21.997	21.1694
O35685	174	Nudc	1	23.5612	23.2935	24.1508	23.8147	24.3692	23.6845	23.4654	24.0334	23.6843	23.165	23.7665	24.319	23.5703	23.1151	23.0884	23.8974	23.7159	23.0836	23.4578	22.4855	23.9784	24.1373	23.5832	NA	24.0973	24.065	23.767	23.8761	23.0964	23.9261	23.7367	23.2292	23.5119	23.5065	23.7348	23.5838	23.3211	24.1166	24.3119	24.31	23.2596	23.4321	23.7473	23.5107	23.9796	23.4479
Q9CQF3	29	Nudt21	1	20.9884	NA	NA	NA	NA	NA	NA	NA	NA	NA	20.9645	21.2941	NA	21.0153	NA	NA	NA	21.5135	21.0527	20.6056	21.6561	21.3407	21.5312	20.452	21.5624	21.6228	21.8032	21.7584	20.9225	21.7596	21.2448	20.8471	20.5795	21.4108	21.297	21.435	21.1249	21.8293	22.1266	21.9792	21.1258	20.564	21.5042	21.7315	20.8832	21.2416
E9Q7G0	106	Numa1	1	21.8905	22.1547	22.5356	22.2067	23.9161	NA	22.3986	22.447	22.4856	22.0148	22.5954	22.3611	22.506	23.0267	NA	22.8181	22.3453	21.9359	22.5391	22.5901	21.9338	21.5715	22.4299	NA	22.3309	22.6178	21.8717	22.5921	22.3738	22.2881	22.5768	22.7909	NA	22.2251	22.4407	22.9951	21.7429	22.4695	21.9833	21.8312	22.0736	21.6486	21.4346	22.3425	22.4	21.7368
P11928	73	Oas1a	1	22.4925	22.8701	23.1983	23.284	NA	NA	23.3176	22.7015	22.1672	21.9915	22.3201	22.9433	23.7909	22.9491	23.4819	22.7741	22.9648	22.9962	23.1605	NA	23.2189	22.7363	NA	NA	NA	23.1426	22.3576	NA	22.0658	23.0387	22.4141	23.6693	22.4798	23.2939	23.2276	21.6829	22.0161	22.0483	22.7228	23.1851	NA	NA	22.4221	22.0186	22.0651	21.9223
Q9Z2F2	44	Oasl2	1	21.2246	NA	20.9048	20.3915	NA	NA	NA	21.0929	20.0199	21.3266	20.4875	21.1289	20.9328	21.4275	21.5269	21.1014	21.4567	20.1992	19.8758	NA	NA	22.9214	NA	NA	22.4257	NA	21.9667	21.6099	19.6636	20.3962	19.8488	NA	NA	20.874	20.9094	20.412	20.33	20.3283	21.505	21.2677	NA	NA	21.6054	21.1227	19.8722	20.5807
P29758	97	Oat	1	23.0756	21.1512	21.849	22.3701	NA	NA	21.9266	22.2624	22.0935	21.757	23.4161	22.0082	NA	22.5986	NA	22.4643	23.6225	22.9953	22.409	23.2372	21.4654	22.3928	22.8165	23.656	21.3936	22.6143	22.7264	22.3527	21.583	20.9093	21.567	22.5416	NA	20.9302	21.4002	21.4939	22.0686	22.6069	22.7179	20.6267	NA	23.1414	22.8431	22.2395	21.7809	21.4241
Q60597	132	Ogdh	1	22.5542	22.1927	22.251	21.632	24.0271	NA	22.4378	21.9947	21.9507	21.7538	21.483	22.0831	NA	22.0532	22.7653	22.5191	22.5596	22.6329	22.2192	22.7652	22.3155	22.5813	21.8032	NA	22.2428	22.304	22.0167	22.5059	21.3179	22.1626	22.0875	NA	23.2198	22.9047	22.0383	21.9413	21.9281	21.7257	22.2456	22.2382	22.8706	NA	22.7661	22.3091	21.7824	21.6158
Q99PG2	79	Ogfr	1	21.9271	21.8802	22.258	21.6716	NA	NA	NA	22.2034	21.9134	21.4909	20.5295	20.4195	NA	NA	NA	21.2327	21.7195	21.6587	21.629	NA	21.4023	21.6544	21.9332	NA	22.0458	21.7519	21.0204	21.5545	21.7218	NA	21.3506	NA	NA	21.5907	21.8043	21.5073	21.2482	22.4095	22.3706	21.3526	NA	NA	22.1923	22.6591	21.6384	21.4725
Q9CZ30	90	Ola1	1	23.0073	23.1872	23.2012	22.8031	NA	NA	22.6746	23.1285	23.1699	23.0652	23.7871	23.7054	23.5663	22.7042	22.4746	23.2582	22.5327	23.3873	22.998	24.1149	23.9245	23.3684	23.5224	23.4849	23.3182	23.2093	23.4516	23.1375	23.1499	23.4708	22.9489	23.3147	NA	23.0452	22.8699	23.5637	23.6962	22.8509	22.9466	22.5552	22.6143	NA	23.1045	22.6062	23.6756	23.7146
Q7TQI3	144	Otub1	1	23.5886	23.4703	23.3795	23.1199	NA	23.9388	23.2417	23.4034	22.9085	23.0322	23.0467	22.4599	NA	23.1589	NA	23.0363	23.5366	22.6636	23.264	22.8919	23.0646	23.0805	23.1348	24.0959	22.8817	23.2919	23.0437	23.5423	23.4046	22.9136	23.2776	NA	24.243	23.5898	23.2625	22.827	22.2788	23.7234	22.8435	23.5603	23.3398	24.2194	22.5613	22.8836	23.1493	22.872
Q9D0K2	114	Oxct1	1	23.6201	23.1243	23.9986	23.7092	26.111	NA	24.5746	24.2435	22.4627	24.0829	23.611	23.7037	NA	23.2377	23.0453	23.2266	23.1041	22.9328	22.6437	23.205	23.0576	22.9988	22.783	NA	23.7371	23.5667	23.476	23.5632	23.8011	23.6259	24.736	23.2178	24.4212	23.9254	24.2809	23.3516	23.3519	23.3054	23.119	22.3612	22.8948	NA	23.6842	23.4004	23.286	23.0593
Q60715	335	P4ha1	1	24.5287	23.7508	23.9334	23.7665	24.9099	NA	24.6733	23.553	23.3258	23.4992	23.7969	23.6322	23.6255	23.6687	24.1074	23.4883	23.3815	23.3905	23.5529	23.93	23.898	24.1708	24.4633	24.3808	23.624	23.7863	24.4853	24.1528	23.7164	23.4202	23.8004	23.9162	24.1886	23.7757	23.5918	24.1056	24.0218	23.4282	23.9481	23.4819	24.3076	24.5379	24.415	23.4861	24.1475	23.9463
Q60716	104	P4ha2	1	23.7378	23.2711	23.3728	23.613	NA	23.9246	24.1045	23.4741	22.9669	22.9678	23.9587	23.7234	23.7334	23.3564	NA	23.4541	23.1603	23.3359	23.6316	23.5183	24.0452	23.9496	23.7089	22.9074	22.8036	24.1101	23.6139	23.5179	23.2409	23.8705	23.42	23.7579	23.2428	23.3763	23.8886	23.8872	23.4383	23.7673	24.1339	23.8674	23.7498	23.4442	24.0267	23.9033	23.991	23.821
P09103	742	P4hb	1	27.0481	25.18	25.2413	25.1547	25.675	26.1697	25.9458	25.2201	25.3718	24.7625	25.3594	24.9777	26.2956	25.603	26.4243	24.7898	24.7656	24.9256	24.9915	25.4435	25.2711	25.4002	25.1696	26.726	25.4359	25.1845	25.5104	25.0716	25.0611	24.646	24.9804	25.8125	25.0565	25.0345	24.8329	25.2547	25.316	24.6837	25.0057	24.9419	26.1115	25.601	24.9889	25.352	25.5098	25.5198
P50580	193	Pa2g4	1	24.2478	23.5691	24.2422	23.1951	NA	NA	25.371	24.8228	24.4011	23.5458	23.2258	23.816	23.9176	23.4908	23.699	24.0908	23.4909	24.0417	23.1698	22.8413	23.411	23.7053	23.8897	24.0017	23.5107	24.045	23.6088	23.0228	24.3334	24.1926	23.9413	24.3025	24.1765	23.8049	24.2218	24.4384	23.7435	23.7313	24.2253	23.6923	24.1819	24.5204	24.1927	23.4768	23.8129	23.7981
P29341	327	Pabpc1	1	24.2804	23.5896	23.8392	24.1513	24.2156	24.1241	24	24.1709	23.9899	24.0644	24.1896	24.2923	24.1951	23.7501	24.0822	24.3574	23.9077	24.0296	23.9739	23.1447	23.6729	23.7779	24.6128	24.364	23.529	23.5103	24.1051	23.9011	23.6227	23.9377	23.8624	23.5977	24.1368	24.0365	24.0655	24.5671	23.9942	24.2175	24.1289	23.8884	23.8189	23.5984	24.1042	23.9212	24.1834	24.3224
Q9WVE8	131	Pacsin2	1	23.1687	23.3763	22.6899	23.2565	NA	NA	23.5544	23.0985	23.5021	23.0048	22.9953	24.2438	23.5718	23.2754	23.5181	23.253	23.1874	22.5599	22.9356	NA	22.2639	23.1406	23.2957	23.09	22.4456	23.3416	22.5497	23.447	22.539	23.5145	22.8422	22.7782	22.0892	22.9117	22.3942	23.0651	23.2139	23.2657	22.664	23.0387	NA	NA	22.6754	22.6248	22.6484	22.6207
P63005	42	Pafah1b1	1	21.0566	20.1837	20.6232	20.7032	NA	NA	NA	21.5089	20.5683	21.4979	20.2797	20.3142	NA	NA	NA	21.048	NA	20.5402	20.6813	20.1993	21.0366	20.9966	NA	NA	21.4965	20.7938	21.4274	20.7889	19.8051	20.5492	20.9274	NA	NA	21.4452	20.8536	20.7906	21.3919	22.4975	NA	21.4071	NA	NA	22.3454	NA	21.828	21.5502
Q61206	35	Pafah1b2	1	21.5229	21.7433	22.1057	22.0659	NA	NA	21.6804	20.6513	21.735	20.3897	21.1601	22.5614	22.1132	21.8935	21.8594	22.6163	21.6775	22.1015	22.187	21.5839	22.812	22.246	21.0364	22.2303	21.1789	21.3594	21.8064	20.8147	20.605	19.8698	19.9981	20.9721	NA	20.9203	20.5668	20.7683	20.9031	20.5614	21.2735	21.0984	NA	NA	21.6566	21.3981	21.428	21.4707
Q9DCL9	211	Paics	1	23.5426	23.6789	23.9185	23.4721	NA	NA	23.1355	23.3177	24.2948	23.5097	24.2169	24.0208	24.5262	23.8343	NA	23.7576	23.7534	24.0004	24.3829	22.7569	23.801	23.0846	24.1395	NA	23.3872	23.9124	23.7989	23.9239	24.2273	23.9233	23.9579	23.5489	23.9114	23.8343	23.4293	24.3051	24.2747	24.5773	24.067	23.8991	23.2325	23.2779	23.9824	23.2254	24.0398	24.0318
Q99LX0	97	Park7	1	23.7086	22.0212	21.8115	22.8895	NA	NA	22.4773	22.4188	22.4617	22.4125	22.4054	22.7246	23.1885	22.8972	NA	22.7499	22.6596	22.2418	22.5402	22.8222	23.1974	22.8969	22.5174	23.0769	22.4859	22.9712	22.58	22.094	22.1145	22.3471	22.2613	NA	NA	22.5458	22.7301	21.6945	21.8002	22.938	23.1348	23.112	23.4393	23.2579	23.0637	23.217	22.6887	22.837
Q9EPC1	65	Parva	1	22.3348	21.8295	22.6269	22.1436	NA	NA	23.019	22.7557	22.513	22.6952	22.9717	22.5023	23.2929	22.0232	NA	22.4912	22.7509	22.936	22.9935	NA	22.1202	21.9725	22.0208	NA	21.5781	22.3974	22.9831	22.9913	23.0933	22.6839	22.3622	NA	NA	22.1716	23.0498	22.5556	23.1198	22.2798	21.9447	22.1986	NA	NA	21.9257	22.7469	22.9674	23.2854
Q925B0	28	Pawr	1	20.187	NA	NA	NA	NA	NA	NA	NA	NA	NA	22.3282	22.8437	NA	22.1671	NA	20.3201	20.7774	22.0686	21.2377	NA	20.6948	19.5186	20.5254	NA	20.0194	21.598	21.9974	20.8244	NA	NA	NA	NA	NA	NA	NA	NA	NA	21.3664	19.7387	19.8033	NA	NA	20.7856	19.6293	21.9876	22.262
P60335	85	Pcbp1	1	23.0232	22.5116	23.3113	22.7023	NA	NA	NA	22.5747	23.1784	22.8222	NA	23.446	NA	NA	NA	NA	24.1801	NA	NA	NA	23.7045	23.7673	22.6263	NA	23.2501	23.8298	23.2845	24.1647	22.5486	23.5914	23.1357	NA	NA	23.1094	23.0822	23.0082	22.9417	23.6826	21.7368	22.7013	NA	22.8837	23.7377	23.3489	23.3538	23.2417
Q61990	223	Pcbp2	1	24.5363	24.7104	25.2388	24.2077	26.0319	NA	23.6707	24.734	24.7718	24.8544	24.4792	24.9736	23.6187	23.9737	NA	24.7981	24.821	24.6353	24.6743	22.8221	24.331	24.5386	23.9308	24.9688	24.5062	24.6895	24.6802	24.5535	24.6116	24.8814	24.5604	23.6819	23.7203	24.7035	24.6035	24.5355	24.5844	24.7219	24.7337	25.1215	24.8709	24.0157	25.2844	24.9939	24.4914	24.8272
Q8BH04	171	Pck2	1	23.2953	22.9178	22.7296	22.273	NA	NA	23.5626	23.2589	22.4033	22.7028	23.028	22.5718	NA	22.5036	NA	23.0584	22.731	22.8442	22.5252	22.9081	22.5579	22.3976	22.453	NA	22.4468	23.1021	22.8004	22.3889	22.5261	22.8517	21.9697	22.7376	23.4657	22.3109	22.5388	22.4349	22.4696	22.5517	22.9482	22.4824	22.7939	NA	22.6342	22.5	22.9475	22.2297
P17918	172	Pcna	1	24.4679	23.8893	23.8403	23.8614	NA	NA	25.2725	23.5312	24.0651	23.876	23.7064	23.8587	24.9106	24.371	24.8141	23.8096	23.8257	23.7158	23.7233	NA	22.942	21.8561	NA	NA	22.805	22.7627	23.0416	22.8734	23.0554	22.6062	23.4377	25.0523	25.6499	23.233	22.6492	23.0188	22.8052	22.7835	23.4304	23.8001	NA	NA	23.2221	23.8878	23.175	23.8121
Q3UHX2	52	Pdap1	1	21.8045	22.3031	22.4835	22.3568	NA	NA	21.8408	21.769	22.7448	22.3526	22.2671	22.4673	NA	21.0991	NA	20.7368	21.5931	21.8674	22.4362	NA	21.9821	21.86	21.2443	NA	21.9088	22.3967	22.5347	22.5757	22.0223	22.2316	21.5877	NA	NA	21.0987	21.8652	22.5821	22.5081	22.9074	22.359	21.9284	NA	NA	22.1628	21.6931	23.2403	22.7788
P12815	40	Pdcd6	1	21.6249	22.0444	22.0265	21.7741	NA	NA	21.3123	22.0281	21.5457	22.3024	22.5506	22.2929	NA	21.956	NA	22.058	21.9953	21.9978	21.2509	21.0195	22.6569	22.0343	21.9274	NA	22.2468	21.6953	22.248	21.7376	22.8437	23.1042	21.8544	NA	NA	21.9307	22.4703	23.0662	22.4305	21.6133	21.9146	21.7362	NA	NA	22.2193	22.0149	22.2683	21.5047
Q9WU78	81	Pdcd6ip	1	22.0705	21.9503	22.7866	22.9056	23.0325	NA	22.6807	22.3239	22.4086	22.2885	22.1491	22.5438	22.5067	23.1891	22.7065	22.7206	22.3454	22.1359	22.6017	22.2139	22.5544	22.4967	22.5274	NA	23.1729	22.4026	22.4362	22.7381	22.345	22.3047	21.972	21.8491	NA	22.2631	22.2182	22.2131	22.0926	21.7503	22.8429	21.972	NA	22.7713	21.995	22.1678	22.022	21.9486
P35486	41	Pdha1	1	21.0031	20.1792	20.4735	21.2898	NA	22.0343	21.303	21.2328	20.3452	20.9824	21.0787	20.7966	NA	21.066	21.463	20.9522	20.5874	20.543	19.8363	21.3141	20.7509	21.9537	20.4592	NA	NA	21.4433	20.8672	20.9852	20.2359	20.0161	20.6218	NA	NA	20.6524	NA	20.8828	20.7316	NA	NA	NA	NA	NA	NA	NA	NA	NA
Q9D051	44	Pdhb	1	21.0835	NA	NA	NA	NA	NA	NA	NA	NA	NA	20.8654	20.8924	21.1565	NA	NA	21.2928	20.3846	21.5788	20.9189	21.3432	21.3225	21.0835	19.6765	20.209	20.6438	21.3347	20.8437	21.0467	21.0175	21.4933	20.9567	NA	NA	NA	19.9779	19.7113	21.2276	22.675	22.8751	22.8203	22.5062	21.6172	22.8094	22.746	21.7711	21.7514
P27773	563	Pdia3	1	26.7307	25.6916	25.3416	25.4732	26.6205	25.5669	26.0774	24.9597	25.7	25.754	26.5762	25.9095	25.7632	26.075	24.9891	25.7761	25.4953	26.2855	26.5477	26.8015	25.8896	25.7034	25.5341	25.2029	25.3305	25.3896	26.1933	25.8458	26.5829	25.7712	25.5874	26.4948	26.3486	25.3038	25.6921	26.4401	27.0095	26.2254	25.9203	25.0515	25.791	24.905	25.5235	25.4344	26.1408	26.1105
P08003	341	Pdia4	1	24.0695	23.5238	23.1488	23.3091	24.3652	NA	23.8595	23.0834	23.2538	23.3814	24.361	23.9415	23.8152	23.5283	23.7793	23.7174	23.2674	23.4484	24.0878	23.8862	23.5979	23.1208	23.3075	23.3614	23.3073	23.333	23.1304	23.3389	23.8034	23.9131	23.1591	24.2233	23.8227	23.0974	23.444	23.8965	24.6637	24.1568	23.4816	23.2835	23.5148	23.9246	23.0522	23.5043	23.1729	23.3402
Q922R8	265	Pdia6	1	24.7779	24.4554	23.9826	23.9587	24.6391	NA	24.9549	23.7958	24.264	24.5562	25.1328	24.4732	24.3186	24.9336	NA	24.5804	24.0468	24.5679	25.5341	25.0517	23.8322	24.3902	24.3379	23.9699	24.508	24.2946	24.4222	24.619	24.3571	24.2943	23.6087	25.0664	NA	24.4545	24.4699	24.5493	25.0932	24.7003	24.2479	24.0649	24.3162	24.8258	24.3871	23.8676	24.7384	24.8293
O70400	65	Pdlim1	1	22.0484	21.6535	21.2458	21.7381	NA	NA	NA	20.8659	21.1857	22.4294	21.6891	22.584	NA	NA	NA	21.9064	22.4629	21.7385	21.8395	21.5579	21.4708	21.6998	NA	NA	21.2848	21.6973	20.2767	20.2956	21.7001	22.4953	22.198	NA	NA	21.7144	21.3864	21.357	21.7585	22.4176	21.8523	21.1474	NA	NA	NA	21.0774	20.85	NA
Q8CI51	75	Pdlim5	1	22.473	22.087	22.3497	22.7582	22.6096	NA	21.5309	22.0328	22.4657	22.6422	23.294	22.5596	23.463	23.7815	22.5326	22.8508	22.768	23.5709	23.0055	22.272	21.6972	22.8264	23.1353	NA	23.0058	23.213	23.0143	23.0048	23.4377	23.9531	24.8202	22.3511	22.751	23.5519	23.8007	23.7688	23.7139	22.9148	21.9929	22.3047	NA	NA	22.2569	22.5795	23.3968	23.1983
Q62048	82	Pea15	1	22.9267	23.5868	23.3665	22.9225	NA	NA	23.0445	22.7061	22.6315	21.6744	23.1185	22.5148	22.9913	22.6229	23.4922	22.683	22.5255	23.0285	22.8781	NA	21.1912	22.0863	NA	NA	21.5938	22.0239	21.9026	20.9604	22.7442	22.6546	22.9606	NA	23.041	22.3174	22.4232	22.3276	22.3888	22.9248	23.3224	22.7347	NA	NA	23.2463	23.1449	21.9162	22.041
P70296	145	Pebp1	1	24.8757	24.5253	23.9066	23.9097	NA	NA	24.4317	24.629	24.5854	24.082	24.7133	23.0742	NA	25.3049	NA	24.1635	25.0957	23.6825	24.3006	25.2788	24.4819	24.6076	NA	NA	24.6572	23.9931	24.2111	23.3077	24.2338	23.863	25.1036	NA	NA	24.719	24.3571	23.793	24.3918	23.077	24.4374	24.4547	25.1366	NA	24.2483	24.6537	24.267	24.3367
P12382	154	Pfkl	1	22.9847	22.5679	22.8224	23.2702	NA	NA	22.7002	23.2491	23.0867	22.669	22.6767	22.5945	22.961	22.7068	24.2261	23.6463	23.2559	22.5519	22.541	NA	23.2702	23.3747	NA	NA	23.2667	23.5621	23.3177	22.8618	23.054	22.8268	22.7428	NA	NA	23.4567	23.6358	23.0923	22.5137	22.9089	23.2503	22.7043	23.9457	23.2753	23.3692	23.1412	22.6061	22.3801
P62962	263	Pfn1	1	26.0191	24.9526	25.0965	24.7051	NA	NA	25.5105	25.0076	25.5091	25.3603	24.7269	23.9726	24.5298	24.4979	NA	23.9992	24.3801	25.0755	25.1455	25.2354	24.3563	24.6998	25.2721	26.9466	24.7546	24.4657	24.7417	24.761	25.2023	24.6935	25.1338	NA	26.4099	24.5785	24.6692	24.6009	24.66	24.3528	25.0197	24.7547	25.3749	NA	24.5297	24.8834	24.7762	24.9225
Q9DBJ1	222	Pgam1	1	26.3071	26.0717	25.7307	25.473	29.0675	NA	27.1497	25.4624	25.7476	24.6366	24.1021	24.0962	25.7082	24.6032	25.879	24.8107	24.4254	24.5475	24.6293	25.9286	24.6927	24.1139	25.2952	26.0129	24.247	25.5405	25.1484	24.705	23.8419	23.4469	24.1502	24.6704	25.2869	24.0762	24.4644	24.1156	24.1541	25.9134	24.6527	25.0129	26.2622	26.3138	25.0802	25.1298	25.008	25.238
Q9DCD0	169	Pgd	1	23.6366	22.819	23.2824	23.2032	NA	NA	23.642	23.5133	22.4633	22.8259	22.7286	22.8474	NA	22.927	23.1747	23.0846	23.2395	22.0225	22.4816	23.1585	23.1962	23.9821	NA	NA	23.4255	23.0962	22.6815	23.0744	23.2458	24.0537	23.7458	24.3854	25.0182	23.566	23.7413	23.2893	23.0097	22.8693	23.085	22.9425	NA	NA	23.4461	23.027	22.9616	23.0833
P09411	489	Pgk1	1	26.349	24.5445	25.1136	25.0956	25.3117	25.1966	24.6803	24.9937	24.5536	24.7342	24.3211	24.2738	24.8614	24.8631	26.0874	24.3812	25.1505	24.8317	24.5128	25.3289	24.6335	25.5672	25.2018	25.7035	25.0141	24.7314	24.9606	24.6983	24.7679	24.0468	24.7447	NA	24.9597	24.6022	24.8749	24.9508	24.9866	24.2329	24.8788	24.7217	24.6623	25.527	25.3322	25.2955	24.6456	24.9957
Q9D0F9	119	Pgm1	1	22.9509	22.8111	21.803	23.0699	NA	NA	22.9961	22.7781	22.1572	23.6926	22.3411	22.2372	23.119	23.0458	NA	22.7778	22.9423	22.017	22.1826	22.754	22.2954	22.4375	22.8115	NA	22.3428	22.0786	22.5041	22.3079	22.1391	21.424	22.8365	22.5751	22.4211	21.8964	22.1071	21.4552	21.9419	21.836	22.2263	22.1694	NA	22.9594	21.9126	22.1212	22.4072	22.5122
P67778	344	Phb1	1	24.1054	23.8275	23.7074	24.3374	24.5271	NA	24.347	23.4833	23.9735	23.9819	23.8894	24.1396	22.912	23.6557	24.8106	23.7977	23.4429	24.326	24.733	24.5003	24.5066	23.3525	23.8895	22.9315	23.8819	23.9341	24.0927	24.1064	24.0212	23.998	23.8095	23.8975	24.9862	23.719	24.0485	24.0069	24.0443	23.7543	24.0361	23.8624	24.1466	23.8746	23.8205	23.9488	23.6611	24.1
O35129	217	Phb2	1	24.3669	25.0596	25.2326	25.0752	25.7676	24.7616	24.963	25.3895	24.6052	24.3577	24.6198	24.4712	24.5535	24.4375	24.8877	24.2586	24.6868	24.6423	24.9024	24.7785	25.1171	24.3924	24.769	24.593	24.6302	24.55	24.6058	24.9348	24.7014	24.6164	24.5105	24.7318	23.9768	24.7543	24.7773	24.9668	24.5472	25.0422	24.7083	25.1951	25.3144	24.0741	25.2059	24.9614	24.5792	24.4141
Q61753	211	Phgdh	1	24.4908	24.9381	24.9681	24.7597	23.8491	24.493	23.5431	24.9126	24.2597	24.3661	24.6984	24.6385	24.1235	24.2693	NA	23.9189	24.6358	24.4507	23.6472	24.0337	24.076	24.3494	24.7163	NA	24.3003	24.3045	24.3594	24.4401	24.4205	24.4588	24.3187	24.3212	24.5753	24.4516	24.3269	24.5744	24.203	24.8441	24.9333	25.145	24.4442	24.9706	24.7593	24.3986	24.832	24.6061
Q7M6Y3	30	Picalm	1	20.3401	21.2141	21.2981	21.0782	NA	NA	20.8701	20.8028	21.1096	21.2269	21.1524	20.4429	NA	20.9422	NA	20.443	20.7821	21.2645	20.4912	20.3542	20.8109	20.7716	20.6125	NA	20.6997	20.5059	20.8558	20.0596	20.8971	21.0373	20.3101	20.5134	NA	20.3323	21.3571	21.3369	21.4849	20.5514	20.5519	21.2066	NA	NA	21.3522	21.1959	21.68	21.1502
Q8K411	87	Pitrm1	1	21.8379	21.992	22.1626	22.1178	NA	NA	NA	21.6154	22.026	21.8302	22.2352	21.357	NA	NA	22.4787	22.2881	NA	22.6271	22.545	22.3103	21.7168	21.6849	NA	NA	22.0617	22.3312	21.482	21.8909	22.2153	NA	21.6617	23.0755	NA	22.1275	22.929	21.755	21.4948	22.0831	21.2956	21.2408	NA	NA	NA	NA	21.7159	21.8336
P52480	840	Pkm	1	27.1059	26.7546	26.7353	27.0193	26.9986	26.7817	26.4199	26.6143	26.6268	26.2756	26.1054	26.7044	26.5747	26.4564	26.3612	26.7839	26.7787	26.0163	26.9841	26.1637	26.709	27.0805	26.4853	26.1654	26.8522	27.118	26.8001	26.4253	26.705	27.0898	27.1667	27.2735	26.8791	27.2004	27.4815	26.8958	26.5743	26.069	27.1537	27.2297	25.9737	26.1212	27.1847	27.0748	26.6797	26.6959
Q9QXS1	2348	Plec	1	24.608	24.9885	24.609	24.7467	24.9846	24.6376	24.5733	24.5075	24.8475	25.0877	25.4418	24.6399	24.5908	24.9983	24.4576	25.0268	24.9089	25.2262	25.0667	24.3887	24.4818	24.723	24.9653	24.7122	24.53	24.8349	25.2258	25.1192	25.3688	24.6623	24.4512	24.7744	24.7613	24.8421	24.6223	25.0337	25.3227	25.6024	25.1933	24.9305	24.5399	24.5063	24.7568	25.127	25.6265	25.7274
Q9DBG5	47	Plin3	1	21.6088	22.3465	22.1504	22.4405	NA	NA	22.0114	21.1054	22.2563	22.0258	22.973	23.3545	NA	22.9661	NA	22.4214	22.9338	22.7071	23.3511	23.0346	22.5854	21.9418	22.1314	22.4632	22.2816	22.3385	22.5483	22.2378	22.5011	22.9772	22.5651	23.0436	NA	22.6093	23.0335	23.6485	23.0554	22.6694	22.3451	22.2567	22.6684	NA	22.2737	22.0837	22.277	22.9137
Q9R0E2	47	Plod1	1	21.0624	20.9225	21.5596	21.7001	NA	NA	22.3631	22.1453	20.9958	21.4641	NA	NA	NA	NA	NA	NA	23.589	NA	NA	NA	21.9594	20.7979	NA	NA	21.5801	21.2706	21.6155	21.1744	21.3816	20.9942	NA	NA	NA	21.7517	21.4347	21.4808	21.0123	NA	21.3462	20.6961	NA	22.0603	21.3953	22.2082	20.8303	20.7228
Q9R0B9	59	Plod2	1	21.3915	22.5326	21.3362	22.3347	NA	NA	22.4909	22.4576	22.6037	21.7283	21.7917	21.9321	22.6933	NA	NA	NA	22.6724	NA	22.2732	NA	21.0181	20.5565	NA	NA	20.3622	20.5606	21.0738	NA	20.6789	22.0502	20.9995	NA	NA	21.9668	21.6224	20.8026	20.6254	21.9123	22.3868	22.0823	22.7548	NA	22.4142	21.8809	22.1745	21.8688
Q9R0E1	56	Plod3	1	21.0481	21.377	21.9929	21.7729	NA	NA	21.5679	21.5223	21.0941	21.2832	21.8833	21.3435	20.7566	21.8981	NA	22.068	22.0625	21.7641	21.6701	21.3335	21.9252	20.9576	21.8188	NA	22.2885	22.1918	21.5748	22.1326	22.182	22.1088	21.9147	21.1714	21.0329	21.8833	21.9767	21.495	21.8548	22.4136	NA	NA	NA	NA	NA	NA	NA	NA
Q9R1Q7	22	Plp2	1	20.9826	NA	20.6883	20.3991	NA	NA	NA	NA	20.7142	20.7365	20.9758	NA	NA	NA	NA	NA	NA	NA	NA	NA	22.2627	NA	NA	NA	23.6106	20.6775	NA	NA	NA	NA	21.0765	NA	NA	20.5432	NA	20.9348	20.7435	20.5238	22.1221	20.5439	NA	NA	22.7219	21.7822	NA	21.1807
B2RXS4	28	Plxnb2	1	20.917	20.7909	21.2513	20.3828	NA	NA	20.4821	21.0623	20.1882	20.9619	22.6835	21.9938	22.2527	NA	NA	21.9267	NA	22.0462	21.8754	NA	NA	21.7946	NA	NA	22.4914	NA	21.7819	22.0451	21.6109	21.9651	22.3107	NA	NA	NA	21.4742	22.2807	22.2007	21.608	21.0624	21.4961	22.0747	NA	22.0144	21.5089	21.8813	21.4598
Q9D819	89	Ppa1	1	22.6611	22.3773	22.6724	22.1157	23.1433	NA	22.6303	23.02	21.8637	22.5529	21.8514	22.3577	22.5586	22.1358	NA	22.7424	22.3539	22.5498	22.2977	22.1549	21.5528	22.6485	NA	22.8453	22.121	21.5961	21.4123	21.6722	22.1	22.9679	22.2441	23.7453	NA	22.927	22.6946	21.6993	22.4874	22.3124	21.6358	22.6006	NA	22.2602	22.2441	22.3179	22.0534	22.0747
Q8C8U0	75	Ppfibp1	1	22.0838	22.3543	22.2218	21.9639	NA	NA	22.3702	22.7497	22.9564	22.5401	22.5415	22.253	23.3854	NA	NA	22.9428	NA	23.0822	23.1131	22.107	22.1494	22.3695	22.1446	22.6542	22.7118	22.2708	22.4169	22.8061	22.2259	22.9292	NA	NA	NA	23.456	NA	23.2546	22.8752	23.223	21.5322	22.1008	22.7114	22.7797	23.0528	21.8062	23.4058	23.291
P17742	379	Ppia	1	27.5806	25.8703	26.2692	25.9832	26.8023	NA	26.1697	26.3241	26.7327	25.7447	25.9901	26.6218	26.4401	27.2828	NA	26.5953	26.3421	25.8369	26.4287	27.0948	26.3544	26.2584	27.0375	NA	26.3064	26.3261	26.4133	26.0344	26.3573	26.0523	25.6875	NA	NA	25.8946	25.5794	25.8841	25.9651	26.4804	26.2306	25.8988	25.7714	NA	25.8186	26.0033	26.7297	26.3521
P24369	193	Ppib	1	24.9848	24.4332	24.5207	24.637	25.1732	25.0071	24.756	24.6803	23.8257	24.3486	24.29	24.5472	25.0503	24.1182	25.8739	24.1112	24.222	24.3453	24.4024	24.5863	24.246	24.1437	23.2705	25.2786	23.5161	24.2735	24.2604	23.9555	24.2218	24.0485	24.0788	24.4772	25.0888	23.9688	23.8709	24.2399	24.3011	24.3757	24.0619	24.5141	25.7509	25.9395	24.375	24.0744	25.3619	25.2697
Q9CR16	118	Ppid	1	22.4079	21.9425	23.4734	22.6823	23.6568	NA	21.8205	23.14	22.8045	21.8698	22.2315	22.7791	22.6055	NA	22.2835	22.2728	22.7526	22.5811	22.3553	22.7138	23.3127	23.1093	22.7878	NA	22.9577	23.0439	22.6507	23.4159	22.044	22.6783	22.8808	22.7965	22.2569	22.6571	22.76	22.5668	22.2913	22.2633	22.5623	23.483	NA	22.249	22.6384	22.7644	22.7907	22.7724
P62137	131	Ppp1ca	1	23.4135	22.2376	22.9814	22.6581	23.548	NA	22.82	22.3422	23.0873	22.9944	22.6893	22.7104	23.2413	23.0536	22.9634	22.8866	22.6788	23.4015	23.2519	22.9245	23.383	22.7636	22.8526	23.2483	22.177	22.8242	22.8769	23.147	22.9948	23.517	23.0988	23.6985	22.8799	22.75	23.1003	23.4537	23.3717	22.9374	23.2316	22.7571	23.2691	23.9735	22.5232	23.2955	23.5632	23.6107
Q9DBR7	56	Ppp1r12a	1	21.5602	NA	NA	NA	NA	NA	NA	NA	NA	NA	21.6755	23.0297	NA	21.484	NA	21.6591	21.2602	21.8134	21.8281	22.3289	22.0794	22.2819	21.9823	21.7999	22.204	22.2963	21.7243	22.1282	21.5363	20.466	NA	NA	NA	21.1438	21.701	22.2167	22.0028	22.0473	21.974	22.065	NA	NA	21.1863	21.8055	22.2786	22.1819
Q3UM45	51	Ppp1r7	1	21.3966	21.7272	21.9276	21.1449	NA	NA	21.8721	21.3374	21.8305	21.5784	20.5527	21.4444	NA	NA	NA	20.3751	20.8605	20.7002	20.1254	22.5577	21.1702	21.9696	22.137	24.5477	24.1093	29.3571	21.0072	22.0959	20.9269	20.9043	20.6753	NA	NA	21.1982	20.5222	20.55	19.8498	21.8767	21.4593	19.7714	NA	NA	20.9328	NA	21.5795	21.3258
P62715	91	Ppp2cb	1	23.2406	22.1037	22.1349	21.9381	NA	NA	22.5645	22.3701	22.6033	22.7297	22.3312	22.3605	22.8969	22.5153	NA	21.8064	22.2527	22.485	22.1049	22.0122	22.731	21.3314	22.1492	23.9955	22.2656	22.725	21.9583	22.5947	21.9758	22.3922	21.8333	NA	NA	21.7057	22.5094	22.2753	21.6569	22.0422	21.5022	21.1869	22.7494	NA	22.291	21.7022	22.2227	21.7783
Q76MZ3	239	Ppp2r1a	1	23.3348	23.1747	23.1689	23.0846	27.6438	NA	22.8549	23.3328	23.2197	23.2888	23.4874	23.1303	23.9147	23.1808	23.7948	23.6187	23.2462	23.5305	23.695	22.8663	23.0457	23.321	23.0936	23.9841	23.3423	23.0276	23.0952	23.1524	23.0106	22.7848	23.463	24.2167	24.322	23.1466	23.4688	22.9885	23.3951	22.8458	22.7216	22.9359	NA	NA	22.9171	22.8667	23.1112	22.9556
P35700	319	Prdx1	1	26.5099	26.1391	26.6844	26.3591	26.2479	25.4814	25.1878	26.1048	26.3813	25.7949	26.6258	27.0962	25.5423	25.835	24.7982	26.9523	26.8205	25.9151	26.66	25.2621	27.1994	26.7105	25.829	24.9886	26.2516	26.6697	26.0337	26.5694	26.0913	26.4845	26.389	25.3344	25.1174	26.643	26.6528	26.7371	26.2455	26.8302	26.766	26.3882	24.8221	25.4124	25.8686	26.2661	26.7192	25.8853
Q61171	215	Prdx2	1	25.2992	24.2621	24.5771	24.3837	24.571	NA	24.0148	24.0138	24.4996	24.1388	25.0058	24.4275	25.0098	24.8117	25.6617	24.4271	24.0919	24.2143	24.2447	24.1467	23.8425	23.949	24.1108	24.2052	24.2833	23.9531	24.2205	24.4628	24.2152	24.1704	24.0304	24.5078	25.6942	24.6197	24.284	24.4086	24.6832	25.1745	24.3899	24.9833	24.1799	24.668	24.3659	23.8817	24.9096	24.406
P20108	121	Prdx3	1	23.4581	23.5803	23.2102	22.9464	NA	NA	23.7492	23.265	23.2272	23.3851	22.6622	23.1849	23.3281	23.3614	23.6362	23.2662	22.7246	22.4063	22.6225	23.788	23.8993	23.6642	24.0367	NA	23.3699	22.988	22.9765	23.5527	23.0841	23.6789	23.3765	23.9304	23.6442	22.7432	23.8825	23.5758	23.5775	23.2368	23.2869	23.2514	24.1844	23.6647	24.2181	23.3186	22.8538	22.9981
O08807	60	Prdx4	1	22.741	NA	NA	NA	NA	NA	NA	NA	NA	NA	21.6435	22.0438	NA	NA	NA	22.429	22.5699	21.7553	NA	NA	NA	NA	NA	NA	22.3151	22.1163	21.1922	NA	22.6247	21.2993	NA	NA	NA	22.2043	21.8852	21.4301	21.5572	22.2765	21.9854	NA	NA	NA	NA	21.8565	22.1089	22.0401
P99029	167	Prdx5	1	24.7485	24.0136	23.9132	24.1665	NA	NA	23.3339	24.1665	24.3451	22.7289	23.7899	24.3201	23.9411	23.9156	NA	23.5945	23.9515	23.6899	24.4136	23.4936	23.5967	24.2773	23.4206	23.7319	23.5913	23.6491	23.2636	23.2065	22.9712	23.1527	23.3812	NA	24.3737	23.7347	23.4353	23.1349	23.1647	23.7888	23.294	24.1741	NA	24.578	23.3952	23.7307	23.8721	23.9208
O08709	235	Prdx6	1	24.1239	23.8075	23.4751	23.6801	NA	NA	23.284	23.8053	24.1354	23.5326	23.5229	23.2795	24.0372	23.8509	24.024	23.2644	22.979	23.3761	23.4967	24.0561	23.7091	23.6018	23.7516	23.8113	23.4125	23.4777	23.4206	23.3902	23.2987	23.1035	23.0438	23.9615	23.6947	23.2328	22.7829	23.5422	23.2756	22.8036	23.4995	23.4076	NA	NA	24.4483	23.8485	23.3751	22.8923
Q9QUR6	244	Prep	1	23.0576	22.4269	22.6444	23.0233	23.5347	NA	23.2709	22.8313	22.3401	22.3188	23.2069	23.0926	24.2321	22.3821	22.4969	22.6092	24.06	23.3817	23.1052	23.3952	22.8785	22.5211	23.5032	23.7583	22.9998	22.7167	22.589	22.8165	22.499	22.2403	22.1291	NA	NA	24.0091	21.6356	22.6216	22.3182	22.9627	22.0658	23.0733	NA	NA	22.4999	22.4799	23.0981	21.9359
Q9DBC7	84	Prkar1a	1	22.6456	22.3035	22.3473	22.5566	NA	NA	22.4041	22.4475	22.8117	23.4413	23.1893	22.5656	NA	NA	NA	23.4584	22.7552	23.3518	23.2684	22.5878	22.8122	22.9687	22.9965	23.1676	23.2951	23.9055	22.3018	22.5895	23.5799	22.7707	NA	NA	NA	NA	22.7032	22.7053	23.4627	23.0808	22.9073	22.8501	NA	NA	22.2827	21.8655	23.2296	22.8777
O08795	191	Prkcsh	1	24.3209	22.8716	22.7452	22.6919	NA	NA	23.7071	23.7681	22.7899	22.7736	22.6266	22.1102	24.4658	NA	NA	22.3468	22.9424	23.0707	21.9759	23.206	22.7384	22.0126	21.9467	NA	23.004	22.9092	22.376	22.1504	23.0372	22.2972	21.9387	23.8047	NA	22.5442	22.7762	22.7829	22.6306	21.8226	22.1416	22.4046	24.6113	23.2133	23.3216	22.4305	22.6102	23.082
Q9JIF0	63	Prmt1	1	22.0868	21.2239	20.6951	22.2734	NA	NA	22.1173	22.3109	22.3605	22.3027	21.3198	21.111	22.3689	NA	NA	21.3244	21.7431	21.1519	20.7183	21.8184	22.0969	NA	NA	NA	21.5372	20.9985	21.5404	20.8091	20.9801	NA	21.5056	NA	NA	NA	21.622	21.1837	21.2508	21.7387	21.9181	21.8582	NA	22.3662	22.3785	NA	22.6727	22.3341
Q99KP6	85	Prpf19	1	22.5095	22.569	23.3148	22.675	NA	NA	23.3208	22.5679	22.4089	23.433	23.1344	23.1239	NA	22.936	NA	23.5621	23.2277	23.3821	22.3777	22.5475	21.6964	22.5493	22.5354	22.7892	22.3465	22.1729	22.3846	22.4598	22.504	23.1385	22.3322	22.66	NA	22.8496	22.494	22.16	22.6857	21.7896	23.2202	22.5141	NA	NA	NA	21.5404	22.0768	21.8478
Q99PV0	82	Prpf8	1	21.935	22.9113	22.3295	22.1348	NA	23.2454	22.0384	21.8151	21.856	21.4805	22.4162	22.3027	NA	22.5802	22.9612	22.249	22.9452	21.6316	22.1794	23.1808	22.382	22.6581	NA	NA	NA	21.9799	22.36	22.5784	22.3635	22.0338	22.5859	NA	NA	22.3535	22.068	22.7889	21.9169	24.517	22.4262	23.314	24.8322	22.3313	24.856	22.7358	22.4674	21.7266
Q9D7G0	51	Prps1	1	21.4274	21.9259	22.3971	23.5075	NA	NA	22.5751	22.9111	23.0279	22.1077	22.0281	22.048	22.4006	23.0088	22.6058	22.708	22.8615	22.1936	21.9234	21.6368	21.7597	22.3794	22.2292	22.462	22.6795	21.9673	21.8052	22.2639	21.5413	21.4445	22.3752	NA	NA	20.8901	21.9609	21.4597	21.657	20.3927	21.0414	20.9891	NA	22.0133	22.0266	22.1732	21.5208	21.1917
Q61207	181	Psap	1	25.3052	22.9883	21.9141	23.6387	NA	NA	24.0408	23.8459	23.6972	23.0992	23.5252	24.2323	NA	26.2807	NA	23.6076	24.355	23.0241	23.7522	24.5213	23.3454	23.188	21.906	25.3009	25.2161	23.5709	23.5975	23.8408	22.6673	22.6489	22.6819	23.2753	NA	23.4162	23.2982	23.5295	22.4119	23.9653	23.5509	23.4995	NA	24.49	24.4928	24.7732	23.5558	24.2156
Q99K85	219	Psat1	1	23.8566	23.2312	22.3792	23.2128	NA	NA	23.8415	23.2508	22.9318	23.1991	22.8995	22.1692	NA	22.9993	NA	22.9905	22.5459	22.5072	22.6005	23.5818	22.5635	22.8341	24.0666	24.3102	22.6628	22.6194	23.0793	22.8368	23.0867	22.7628	23.283	NA	NA	24.6764	22.321	22.8404	22.5559	22.8762	22.8241	22.49	NA	NA	23.0601	22.5865	23.3314	23.3113
Q9R1P4	53	Psma1	1	22.2178	21.6717	21.8828	22.2434	NA	NA	NA	21.5479	21.2434	20.9666	23.017	22.6259	22.0828	22.7806	NA	22.3189	21.7981	21.8738	22.4346	22.3202	22.3402	21.5701	21.7909	21.8386	22.0573	22.2889	22.2211	21.1503	22.826	NA	23.2881	NA	NA	22.8597	22.066	22.1272	22.623	22.4583	22.4252	21.9349	NA	NA	22.5146	22.3182	22.2251	22.4769
O70435	57	Psma3	1	21.7624	21.5803	20.8318	22.1338	NA	NA	21.8216	20.5022	21.6827	21.5632	20.5215	20.9198	21.5203	21.2436	NA	20.9781	22.2162	20.9336	21.1269	NA	21.0991	NA	NA	NA	NA	20.9135	20.3867	21.6049	20.9895	20.9403	22.3387	NA	NA	21.3933	20.7168	21.168	20.8708	21.8852	22.1787	21.521	NA	NA	22.1237	20.951	21.6671	21.2395
Q9Z2U1	60	Psma5	1	22.0923	22.0232	22.0432	22.2869	NA	NA	21.9979	21.7749	21.6546	22.2427	21.7561	21.5871	NA	21.6997	NA	20.2998	21.1757	21.9536	20.1928	21.4186	21.8071	21.0475	NA	NA	21.3161	21.4197	21.3371	20.8517	21.7338	20.6695	21.0829	NA	22.0233	21.7727	22.0086	22.2748	21.9926	21.5582	21.3393	21.3756	NA	NA	22.3577	21.2618	21.6949	22.7498
Q9QUM9	64	Psma6	1	22.7052	NA	NA	21.7943	NA	NA	22.1308	NA	NA	22.0388	21.8508	NA	NA	NA	NA	21.5213	NA	NA	NA	22.1858	22.3984	22.5544	22.601	22.4788	22.3793	22.0926	21.7522	20.8763	21.4478	21.1207	21.5497	NA	NA	22.179	21.8441	22.0299	21.1523	22.2328	22.3977	22.206	22.6841	NA	21.8509	21.5219	21.5026	21.1772
Q9Z2U0	108	Psma7	1	23.179	23.8504	25.2391	25.5522	23.987	23.4905	23.6978	23.7924	23.2937	22.8025	23.3927	22.8484	23.1911	23.4396	23.1564	22.499	23.5692	23.0309	22.8547	23.5535	23.4985	23.8834	23.3401	23.2032	23.5288	23.6738	23.6152	23.4807	21.9896	22.3124	26.3542	23.4215	22.7587	22.8078	23.0956	21.9592	21.5281	23.4045	24.8337	24.2353	23.885	23.138	23.0906	23.9117	22.9955	23.2506
P70195	24	Psmb7	1	20.7454	NA	NA	NA	NA	NA	NA	NA	NA	NA	20.4902	NA	NA	NA	NA	21.0454	NA	NA	20.641	NA	20.3709	20.4354	NA	NA	NA	21.1063	19.3936	NA	21.2271	20.9811	21.0782	21.0359	20.7257	20.5803	21.3568	21.4266	20.4089	20.802	21.1455	21.5068	21.3764	21.4527	21.519	21.6454	21.1597	21.604
P62192	79	Psmc1	1	21.9923	23.0433	23.1673	22.8598	NA	NA	22.7645	23.3781	22.9129	23.4965	22.5566	22.7405	21.8786	22.3181	22.1224	22.6613	22.8639	22.3931	22.217	22.8723	NA	22.0948	22.4314	NA	21.8787	22.7793	22.5853	23.3412	22.5518	22.9033	22.6262	NA	21.8407	22.0252	22.2554	22.2325	22.5487	22.4101	23.0778	22.8778	NA	22.1456	22.6876	22.5257	22.3994	22.9103
P46471	126	Psmc2	1	22.8652	22.676	23.5155	23.652	NA	NA	23.0928	23.4526	23.1064	23.8893	23.3186	23.0253	23.2327	22.9844	NA	23.1904	23.8309	23.266	22.6361	23.2859	23.0406	23.2045	22.5801	23.308	23.5137	23.0092	23.4267	23.1564	22.9844	23.063	23.3746	NA	23.8444	23.6116	23.5358	23.556	23.3927	23.0812	23.045	23.3866	NA	23.5286	23.9747	23.4192	22.9073	22.6715
O88685	52	Psmc3	1	22.4933	23.3509	23.3704	23.5673	22.8016	NA	22.2007	23.3085	23.5111	23.7393	23.0212	23.3214	22.5615	22.7285	NA	22.7037	23.5474	23.3309	23.0376	21.9816	23.2468	22.6697	22.1742	21.7195	22.1971	23.3964	22.622	22.4905	22.5526	23.174	23.644	22.6227	NA	23.35	22.7809	22.7814	23.2121	23.0921	23.7388	23.4732	NA	NA	23.1329	23.211	23.3079	23.4221
P62196	132	Psmc5	1	23.1658	23.4154	23.2469	23.6507	NA	NA	23.0178	23.7774	23.7433	23.6633	23.7085	23.9447	23.5798	24.0902	NA	23.5859	23.7366	24.2789	24.0868	23.3994	23.326	22.7574	23.0151	22.6304	23.4779	23.2061	23.3708	23.2506	23.018	23.6376	23.2553	NA	23.1102	22.9899	22.7991	23.497	23.6092	23.3594	23.5011	23.9311	23.0258	23.8905	23.3553	23.9456	23.7437	24.0607
P62334	76	Psmc6	1	22.9596	23.823	23.822	23.4697	NA	NA	23.6534	24.0531	23.7354	23.4086	23.8759	23.6226	22.9495	23.0098	NA	24.5994	23.3528	22.9662	23.1486	22.5729	22.8348	23.8126	23.6507	23.7363	23.4607	23.7077	23.4763	23.5563	23.3679	23.722	23.2211	24.2008	22.9772	23.3054	23.5978	23.3814	23.6033	23.2658	23.5829	23.3664	23.2489	23.6106	23.8105	23.327	23.1151	23.2687
Q3TXS7	60	Psmd1	1	21.8733	21.769	21.5223	22.0786	NA	NA	21.7385	22.1923	21.4875	21.5627	21.3103	21.8372	22.6214	23.0186	NA	21.7382	21.6124	21.6935	22.1249	NA	21.829	NA	NA	NA	20.8175	21.3057	21.4672	21.3632	21.6756	21.8995	22.6266	NA	NA	21.8894	21.0654	21.6956	21.3231	NA	21.0272	21.601	NA	NA	21.7112	NA	21.4568	20.9619
Q8BG32	121	Psmd11	1	23.0194	23.5933	23.314	23.3993	24.2902	NA	22.9432	23.3218	23.2032	23.7925	22.9611	23.5606	23.2713	NA	NA	23.3877	23.0833	23.4708	22.8695	23.0932	23.2074	22.9275	22.7678	22.9557	23.0487	22.3328	23.3038	22.6516	23.2008	23.3656	23.1751	NA	NA	23.057	23.1061	23.2684	23.4456	23.3779	23.8365	23.4946	NA	22.8682	23.4283	23.2539	23.7675	23.63
Q9D8W5	62	Psmd12	1	22.0695	22.8648	22.5241	22.9941	NA	NA	22.6601	22.7407	22.4087	22.5893	22.6708	22.7547	23.2634	NA	NA	23.5406	22.2913	23.1194	22.4147	NA	23.2385	22.1778	23.6958	NA	23.2809	22.7591	22.5871	22.5042	22.3249	22.8783	21.8805	NA	21.9027	21.6735	22.8271	22.7048	22.0738	22.7163	22.9457	22.785	22.5941	NA	23.5724	23.072	22.6871	22.7157
Q9WVJ2	73	Psmd13	1	21.6209	22.5433	22.2276	22.0784	NA	NA	21.899	22.1918	22.5174	21.9261	21.591	21.37	NA	NA	NA	21.3048	21.7315	22.2546	21.9905	21.7473	22.5278	22.0629	22.287	NA	21.73	21.984	22.2531	21.891	22.1255	22.3663	21.2798	NA	22.3048	21.7372	22.4558	22.1535	21.6584	21.8751	21.7503	21.8396	NA	22.2722	22.1097	22.0043	22.2359	21.4585
O35593	40	Psmd14	1	21.4913	21.3783	21.5653	21.6529	NA	NA	21.0518	21.559	21.86	22.2357	21.5964	22.2072	21.2764	20.8068	NA	21.3967	21.7833	21.7236	22.307	21.4157	22.4254	21.7771	21.7938	21.0378	21.7778	21.4765	21.8839	21.5411	21.739	22.344	21.821	21.7971	21.8938	22.4155	22.3919	21.9649	21.8253	21.4984	21.9436	22.0519	22.0026	22.1286	21.906	21.6572	21.7442	22.2573
Q8VDM4	180	Psmd2	1	22.8725	23.4438	23.1635	22.8536	NA	NA	22.7815	23.4684	23.1557	23.867	23.3831	23.0498	22.924	22.7989	NA	23.2415	22.9239	22.7657	22.8254	22.805	22.5695	22.8948	22.747	NA	23.33	23.3772	22.9809	22.7325	22.8623	22.8331	23.1509	23.976	23.2869	23.112	23.4123	22.9214	23.1438	22.7758	23.2863	23.1709	23.9579	23.6077	22.873	22.7474	23.033	23.6019
P14685	89	Psmd3	1	22.3641	22.2675	23.0735	22.8424	NA	NA	22.2942	23.1248	22.5256	23.1439	22.8474	22.7241	22.5843	22.7358	22.5016	22.8418	22.9491	23.1033	22.875	22.5888	22.9546	22.633	22.3653	22.784	22.6553	22.8899	22.6681	22.3375	22.6429	22.7358	22.8923	NA	NA	22.6843	23.0374	22.5645	22.5278	22.2773	23.228	22.8122	NA	NA	23.0669	23.2499	22.9216	22.968
Q8BJY1	40	Psmd5	1	21.241	22.9329	22.0796	23.173	NA	NA	22.6405	NA	23.3104	23.5295	21.6494	23.0423	22.8208	NA	NA	NA	NA	22.4051	NA	22.322	22.1819	21.7238	21.7051	NA	22.0661	21.8725	22.2812	22.3162	22.3218	21.4653	NA	NA	NA	NA	21.8528	21.6075	21.5182	22.4503	22.1001	21.6352	NA	NA	21.9451	21.8387	22.142	22.0772
Q99JI4	60	Psmd6	1	21.9538	22.868	22.7888	22.7619	22.1892	NA	22.7403	22.9513	22.4528	22.4946	22.4182	22.1878	NA	22.6865	22.8531	23.5197	23.0734	22.6866	23.3188	21.2428	21.3791	21.0161	21.3263	22.2075	21.3873	21.6097	21.2835	20.7974	20.7428	21.2099	20.8829	NA	22.9974	21.0713	21.4376	21.2001	21.1138	22.0655	22.6863	22.5043	22.4437	22.2569	22.5235	22.4223	22.1498	22.1302
P26516	85	Psmd7	1	22.5577	22.8558	23.1125	22.7366	NA	NA	22.9566	22.7594	23.154	23.191	22.7756	22.7151	22.6907	23.6306	NA	23.1374	23.6798	23.3487	22.7731	23.4839	23.2054	23.1817	23.3174	23.6942	22.8243	23.6654	23.0956	22.8501	22.5441	23.0487	22.7913	NA	NA	22.8041	23.0259	23.2243	23.0668	22.5574	22.4692	23.0144	NA	NA	23.2597	22.2847	23.0514	22.6479
P97371	176	Psme1	1	25.0972	23.6797	23.774	23.9889	NA	NA	24.218	23.6526	23.2136	23.7883	23.4216	24.6679	24.7091	25.8973	NA	24.6972	24.9158	23.8783	24.6728	23.9505	24.74	24.6179	23.416	24.2669	24.4486	24.1186	23.7072	23.9522	23.9684	24.0409	23.4948	24.2352	24.0721	24.3316	25.199	23.4334	23.6775	24.053	24.2224	24.262	NA	25.0611	24.3173	24.6635	23.8089	24.1424
P97372	105	Psme2	1	23.5327	21.5711	22.3103	23.4004	23.2461	23.3346	22.8296	23.1884	22.5731	22.6044	21.4923	22.9991	22.6843	22.5164	NA	22.6943	22.8919	22.145	22.5875	22.6063	24.1088	23.9492	22.394	NA	22.9618	23.3527	22.4155	22.6155	22.6102	23.2888	22.9405	NA	NA	23.7943	24.1176	22.9791	23.3091	22.8907	24.063	23.2357	23.6912	23.1534	22.9824	23.1421	22.6616	22.0193
P17225	159	Ptbp1	1	24.2433	24.2454	23.7315	24.4773	23.0649	NA	23.9809	23.9053	23.9577	24.0061	23.972	24.44	23.1892	24.5907	23.2301	24.6355	24.059	24.4224	23.864	23.3085	24.0915	23.5429	23.7921	23.4243	23.9361	24.1006	24.2141	23.9043	24.1604	24.0215	24.4522	NA	24.9399	23.7112	24.282	24.4242	24.1525	23.7507	24.5986	24.1263	24.3411	23.8568	24.1637	24.2943	24.3582	24.3708
Q9R0Q7	70	Ptges3	1	23.279	23.1778	23.1616	23.1206	23.9607	NA	23.1161	23.6356	22.9879	23.0011	22.0775	21.9427	23.3238	22.6015	25.1616	22.3919	23.4725	22.1863	21.0963	22.3793	21.9663	21.1872	21.863	NA	20.9439	21.8919	21.1833	19.8251	21.5631	22.0825	20.7088	NA	NA	21.4468	21.1194	21.2474	21.8589	22.3965	21.5811	22.3849	NA	NA	21.288	22.7278	22.0968	22.3308
O35074	112	Ptgis	1	22.8595	23.6866	22.5459	23.3035	24.4397	NA	23.5196	22.2231	23.0538	22.9417	22.4883	21.9713	NA	NA	NA	22.5667	22.4328	23.0261	22.4964	23.0199	23.0279	22.304	NA	NA	23.1973	22.6958	23.0095	23.1453	23.2662	22.7451	22.3043	23.4379	NA	22.5718	23.343	22.3881	22.4209	23.0144	22.5798	22.8085	21.9141	NA	22.7638	23.2523	22.8951	23.1734
P22437	59	Ptgs1	1	21.6588	20.7283	NA	20.9673	NA	NA	22.0023	20.8397	20.8133	20.6724	20.9916	21.8538	NA	NA	NA	20.9568	21.6572	21.8046	21.2041	22.5755	20.9948	22.0255	NA	NA	21.1215	21.1086	21.1364	20.7593	22.0006	21.961	22.0683	22.2912	22.8632	21.701	22.7064	21.2965	21.2394	NA	20.2408	21.1192	NA	NA	22.4853	21.4412	21.2673	20.9384
Q91W27	19	Pth2	0.9965	20.8565	24.3353	25.459	23.9711	23.6034	NA	24.4987	24.1937	23.8348	24.5202	NA	NA	NA	NA	NA	NA	NA	NA	NA	23.8311	25.0005	24.6158	23.7819	21.5005	24.9774	24.1979	23.557	24.369	24.4104	25.8048	25.2003	23.506	21.4542	24.38	24.2872	24.6497	24.5277	23.9999	25.7661	25.0808	23.7748	21.3788	24.5708	24.8262	24.7547	24.3456
P26350	76	Ptma	1	26.6134	24.3411	24.1946	24.4124	NA	NA	24.2103	23.6824	26.203	23.0781	23.7755	25.0696	NA	24.2101	26.2476	23.3384	22.9627	23.8781	22.9334	NA	24.0228	23.6524	23.9617	NA	23.264	23.7423	24.1854	23.7102	23.6992	24.4407	23.2953	NA	NA	24.5409	23.8453	25.054	23.875	23.6845	23.7463	24.2364	NA	NA	24.1271	24.4964	24.6716	24.5398
Q9D0J8	47	Ptms	1	23.5138	21.1559	20.7345	20.368	NA	NA	22.1242	21.8637	21.4869	20.8769	21.1726	22.5299	NA	22.0817	NA	20.7361	20.8332	21.9	20.9175	NA	NA	NA	NA	NA	20.8763	NA	21.0202	NA	22.7156	21.471	21.6088	NA	NA	22.1312	20.737	22.1448	21.7648	20.1036	21.5837	19.8872	NA	NA	20.388	NA	21.6893	21.6095
Q3UEB3	34	Puf60	1	20.9998	NA	20.0583	NA	NA	NA	NA	NA	20.007	NA	21.1538	21.2536	NA	21.1743	NA	20.7151	21.0691	21.1676	20.8949	NA	NA	21.0065	NA	NA	NA	NA	20.4958	NA	21.3451	21.8501	22.1495	NA	NA	21.6738	21.1634	21.1016	21.0959	20.5783	21.6279	21.611	20.8244	NA	21.1869	21.1463	20.4216	21.08
Q922Q4	58	Pycr2	1	21.5943	22.9681	22.6824	22.0412	NA	NA	22.5673	22.4611	22.2959	22.8533	22.4227	22.2254	22.8676	22.7553	NA	22.8092	22.942	21.913	22.3628	22.4549	23.0223	22.3142	21.8887	21.835	22.3833	21.9808	21.9131	21.2738	22.4065	22.2478	21.7069	22.7496	NA	21.4192	21.7112	22.1394	21.6027	22.5574	21.7528	22.5422	NA	NA	22.1728	22.3943	21.3723	21.5681
P61027	77	Rab10	1	23.0099	22.5629	22.8664	22.5892	24.0348	NA	23.0088	22.6652	22.5673	22.9875	22.7316	23.1439	23.4258	23.1879	23.2579	22.9381	22.5543	21.8798	22.2491	24.835	21.8244	22.5746	NA	23.9593	22.899	22.3316	22.4362	22.2412	22.3542	22.495	22.8198	23.7047	23.9046	22.1888	22.8615	20.9599	22.3748	22.5191	22.4819	22.0647	23.2996	24.1054	21.5853	23.2018	22.3936	22.3609
P46638	185	Rab11b	1	23.3634	21.6573	21.5279	21.813	24.7142	NA	23.4562	22.9021	22.4449	21.9091	22.2312	22.592	23.313	23.5751	24.2957	22.5284	22.2075	22.3913	22.5946	23.6212	22.4988	22.6949	23.3693	24.681	22.5187	22.1553	22.1683	22.3661	22.0294	21.7492	23.0363	NA	24.3558	22.1643	22.1754	21.599	21.7597	22.1901	22.0111	22.3526	22.7957	22.7767	22.6165	22.0904	22.4012	22.3487
Q91V41	99	Rab14	1	23.3427	23.4215	22.6868	22.9096	NA	NA	22.9933	22.8195	22.3809	23.045	22.5448	22.4332	23.1327	22.6066	23.3946	22.6611	22.8418	22.5479	22.8267	23.026	22.8009	22.9242	22.6447	23.1327	22.5712	23.2307	23.0085	22.6264	22.6583	22.0696	21.7469	NA	NA	22.973	22.9633	22.5624	22.233	22.598	23.0334	23.1524	23.7559	NA	22.2613	22.7196	23.085	22.8991
P62821	219	Rab1A	1	24.8788	23.1457	23.0444	23.2097	25.1356	NA	23.9893	23.2964	23.7754	23.0504	23.0908	23.2903	NA	23.568	NA	23.4361	23.342	23.6582	23.0955	23.9723	23.1919	23.0754	23.3789	NA	23.2384	23.562	23.1583	23.1061	23.599	23.0995	23.4986	23.7442	NA	23.2417	23.1941	23.0194	23.1448	23.2546	23.6941	23.3827	24.5462	24.9473	23.6391	23.484	23.0648	23.4067
Q9D1G1	31	Rab1b	1	21.6458	20.6313	20.5211	20.0678	NA	NA	21.1995	19.833	20.3281	19.5223	19.8838	20.6593	NA	20.6743	NA	21.4272	19.6486	20.4087	20.1804	20.9103	21.2135	20.3268	NA	NA	21.2227	20.3132	20.5328	20.3945	20.387	20.7919	20.7599	21.1755	20.9481	20.9486	20.3584	20.4007	20.5675	19.3846	20.977	19.7849	21.1295	NA	21.2352	20.1756	20.5744	20.6592
P53994	155	Rab2a	1	24.3501	23.9436	23.7115	23.0289	NA	NA	24.1056	24.2529	23.5852	23.7581	23.101	23.1195	25.1759	24.1802	24.7832	23.3887	23.1526	23.2483	22.754	23.879	23.634	NA	24.1349	NA	22.9398	22.7345	22.9654	22.5824	22.9947	23.9126	23.3931	24.6422	NA	23.5516	24.8064	23.0944	22.9204	23.3318	23.2332	23.4464	24.1091	NA	23.6318	24.3087	23.4475	23.0082
P35278	101	Rab5c	1	23.176	22.6786	22.4771	22.9073	NA	NA	24.3278	23.8896	22.3673	22.3264	22.689	22.7953	23.5994	22.7688	NA	23.3076	22.9482	22.6147	23.2109	22.7359	22.9706	22.7933	23.092	NA	23.3253	22.39	22.7251	22.9108	22.7162	23.2814	22.9646	NA	24.0848	23.6078	23.0284	22.5825	22.8432	22.5605	22.7975	22.8073	NA	23.6819	22.5407	23.5771	22.3471	22.9434
P35279	31	Rab6a	1	21.2901	19.5267	19.3795	NA	NA	NA	20.7761	NA	20.53	19.7272	20.57	20.2107	NA	NA	NA	20.7494	NA	19.7944	20.2371	NA	NA	NA	NA	NA	NA	NA	19.8226	NA	20.3721	20.0635	NA	NA	NA	NA	NA	20.4529	NA	19.2491	19.6519	NA	NA	NA	22.5426	20.4282	20.8961	21.128
P51150	185	Rab7a	1	24.3643	23.5912	23.9693	24.1141	NA	NA	24.0055	23.6443	23.7158	23.4819	23.3722	23.1482	24.8939	23.1992	24.3703	23.3968	23.6471	23.9608	23.4468	23.324	23.4266	22.9791	NA	24.3408	23.7733	23.045	23.35	22.3883	23.9565	23.1579	23.6361	24.2803	24.8792	24.3607	23.0338	23.3822	23.5091	23.5126	23.4432	23.2256	NA	24.4618	23.427	22.7778	23.7335	23.5661
P63001	63	Rac1	1	23.3875	23.0538	22.9448	23.1031	23.1875	NA	22.8886	22.6297	22.7813	23.315	22.8984	22.5321	NA	22.8395	NA	22.7989	23.4744	23.2528	22.7922	22.92	23.0386	23.2719	23.2626	NA	23.165	22.8298	23.2285	23.4507	23.5842	23.4739	22.4728	22.8887	NA	23.1423	22.9893	23.6389	23.5247	22.4537	22.9682	22.4214	NA	NA	22.5927	22.8989	23.2845	22.8394
P68040	293	Rack1	1	24.4119	23.4284	23.2447	23.1607	24.7031	24.0122	23.6547	23.6811	23.6225	22.8375	24.3757	24.0045	24.3914	24.2463	NA	24.3439	24.2834	24.184	24.2206	23.799	22.7837	23.495	23.4059	23.6468	23.0589	23.0847	23.4762	23.5129	23.7168	23.5652	24.0936	23.3863	22.7546	23.8404	24.2587	23.951	24.3315	22.9142	22.8786	22.8063	23.1201	23.2553	23.0779	23.5981	23.7301	23.4638
P54728	76	Rad23b	1	22.3668	22.4302	22.4615	22.2784	NA	NA	23.255	22.1266	22.4659	21.8924	21.672	21.2165	NA	21.943	22.138	23.2656	22.9189	22.0489	21.7625	22.3665	21.8271	22.6146	NA	NA	22.7042	22.1115	22.987	21.6351	22.242	21.5246	23.389	NA	NA	22.628	22.1489	21.6456	21.4994	22.1535	22.5697	23.6377	NA	23.6768	22.5897	22.931	22.259	22.3122
Q9EP71	63	Rai14	1	21.5551	22.5596	22.6385	22.9479	NA	NA	22.9133	22.2187	22.6926	23.3163	21.2308	22.053	NA	22.4018	NA	23.0178	22.9273	21.7592	22.4728	20.8148	21.8814	21.7716	21.9807	21.422	21.5703	22.1498	22.5342	21.1941	23.8218	22.7078	22.1869	NA	NA	21.7556	22.542	23.2075	24.2411	23.1343	22.0852	22.4332	21.5351	21.3813	22.4521	22.4214	23.4635	23.9224
Q9JIW9	43	Ralb	1	22.0541	21.9098	22.2379	21.9748	NA	NA	22.7799	21.3797	21.8194	21.8723	22.0952	21.4937	21.9824	21.8253	NA	21.9773	22.1497	22.3441	21.3982	22.618	23.1922	22.6345	NA	22.2061	22.3319	22.3622	22.5364	22.6504	21.8415	22.9404	22.6765	23.0351	22.5053	24.158	22.8723	23.0649	22.0959	22.111	21.6464	21.726	NA	NA	22.7301	22.2493	21.8729	22.1055
Q64012	60	Raly	1	21.8848	21.8439	21.8884	21.9454	NA	NA	22.2163	22.0354	21.8517	21.7695	22.0316	21.524	22.216	NA	NA	21.3253	21.7004	20.2609	21.306	21.8042	21.6186	22.3519	21.9051	NA	22.1932	22.3715	22.3378	22.0966	22.137	22.0231	21.7634	22.6576	NA	22.0996	21.7036	22.3049	22.6054	22.1216	22.1368	22.0827	22.2988	21.7388	22.3033	22.1052	22.3435	22.007
P62827	173	Ran	1	25.6893	25.0454	24.8678	24.9557	24.5172	24.7779	24.1426	24.9927	24.577	24.3048	24.8693	25.3568	25.1953	24.5471	NA	24.5714	25.0139	24.9042	25.5988	24.755	25.3515	24.93	24.3722	NA	24.7212	25.0536	24.8149	25.1179	24.7789	25.2576	24.3027	25.729	26.4602	25.1612	24.973	25.0348	24.9509	25.3294	25.4848	25.5634	24.644	24.7769	24.9767	25.1312	24.6652	24.8404
P34022	77	Ranbp1	1	24.2135	23.8344	23.5111	23.7213	NA	NA	23.3262	23.7264	23.5687	23.3855	23.3943	23.1248	NA	23.9277	24.205	22.8874	23.7306	23.7213	23.2512	22.7884	23.9468	23.2774	23.0116	23.8083	23.0731	23.1609	23.4863	22.9919	23.0358	22.9958	23.5163	NA	NA	21.9966	23.1484	23.2984	22.7825	23.4416	23.8695	23.6939	NA	NA	23.5688	23.2138	23.4393	23.7441
Q99JI6	132	Rap1b	1	23.874	23.069	24.003	23.8587	24.4932	NA	24.33	23.6928	23.3424	23.0575	23.2081	23.2214	NA	23.3259	22.9659	23.5134	23.9319	23.3156	22.9749	24.156	23.7664	23.596	22.9877	23.6001	23.3178	23.9789	23.8432	23.0604	23.2484	23.0585	23.138	23.8463	23.5495	23.4629	23.8157	23.0791	23.0288	22.4091	24.1547	23.6539	23.459	23.9874	23.5562	23.9227	23.3683	23.2464
Q9D0I9	169	Rars1	1	23.119	24.1958	23.6173	23.4968	23.2396	23.0661	22.2038	23.1822	23.604	23.9055	24.3902	23.714	23.2483	23.3409	NA	22.9951	23.63	24.2763	23.5493	22.5642	24.0151	23.4102	24.0519	23.0355	23.4229	23.2921	24.1992	23.8917	23.5873	23.5145	23.5327	23.6063	23.808	23.3156	23.6242	23.9225	24.1467	24.0977	23.3783	23.5134	NA	24.0762	23.4846	23.3434	23.7959	24.046
Q60972	131	Rbbp4	1	23.9346	23.7307	23.6308	23.437	23.5827	23.6199	23.6147	23.7149	23.7779	23.2773	22.564	22.6517	NA	22.7966	22.9279	22.0326	22.5134	22.8011	22.7516	23.5772	23.5813	23.0004	23.2587	23.9999	23.5149	23.4104	23.1581	23.2012	22.3597	22.9605	22.2535	NA	23.813	22.7773	22.4463	22.5239	22.409	23.9574	23.5032	23.4138	23.6704	NA	23.329	23.3992	23.1705	22.9837
O89086	94	Rbm3	1	23.5133	24.3829	23.5983	24.1767	22.8297	NA	22.7411	24.1289	24.1206	23.9736	24.6161	24.1249	22.7975	23.5727	21.7156	24.6807	23.0816	24.1479	23.7084	21.3322	23.9715	23.8273	24.2474	24.2854	23.2474	23.7719	24.5976	24.0065	24.4023	24.19	23.2667	21.6614	21.9688	23.5998	23.7197	24.3863	24.1042	24.5093	24.8684	24.309	23.2592	23.7958	24.5579	24.6238	24.7188	24.5575
Q8VH51	41	Rbm39	1	21.2769	21.1354	22.1561	21.3809	NA	NA	21.7686	23.5109	22.1698	22.147	21.4819	21.5069	NA	21.4338	NA	20.8966	21.0556	20.6931	21.0986	NA	NA	21.6235	22.814	NA	22.52	21.6281	21.7653	22.1865	20.5444	21.1397	20.736	NA	22.6201	20.799	22.0311	21.4894	21.4269	21.987	21.2195	21.5533	NA	NA	21.7464	21.6629	21.6311	21.4509
Q9CWZ3	58	Rbm8a	1	22.4575	21.8211	22.6948	22.3019	NA	NA	22.2052	21.8765	22.6609	22.2393	22.5788	22.4897	NA	21.7676	NA	22.9074	21.8857	21.8649	22.6999	22.0666	22.5996	21.9416	22.5924	NA	23.2621	22.3926	22.1321	23.2543	22.2315	22.7614	20.5164	NA	NA	22.9659	22.3859	22.7468	21.5749	23.2094	21.9882	23.241	NA	NA	23.0116	21.14	23.0542	22.7219
Q91VM5	158	Rbmxl1	1	23.2148	22.8381	23.2395	23.6632	NA	NA	23.3299	23.4776	23.7468	23.3719	22.8401	22.872	23.3064	22.1914	22.1938	22.8019	22.8081	23.3033	23.2457	22.8729	23.6588	23.2613	23.1362	22.9938	23.3815	23.2289	23.3442	23.3938	23.6012	22.3489	22.6886	23.0142	22.8431	22.7956	23.0955	23.1514	23.2304	23.0758	23.2603	22.6707	23.064	22.9742	23.2478	23.3092	23.246	23.4154
Q05186	90	Rcn1	1	23.1691	21.6143	22.1024	21.8776	22.9173	NA	22.4377	22.2657	21.4234	23.2849	24.3586	22.704	23.0802	23.3338	NA	22.9468	23.0059	24.0689	24.2071	22.8769	23.0489	23.0203	22.8102	22.809	23.138	23.1469	23.7449	23.288	24.3231	22.835	23.3231	22.7485	NA	22.1646	23.039	24.1784	23.777	24.8904	22.1596	23.7105	NA	NA	23.8171	22.9828	23.8428	24.2926
Q8BP92	111	Rcn2	1	23.6181	21.9853	23.0489	23.1864	22.8118	NA	23.3455	23.0306	22.6055	22.7548	22.8542	23.1119	24.1573	23.2913	23.3004	23.5028	23.5487	23.2468	23.0505	23.3532	22.8853	23.2491	23.8261	23.7728	23.7953	23.0306	23.1931	23.319	23.2235	22.9641	23.2608	23.1059	23.5718	23.584	23.4542	22.8662	23.3316	23.2622	23.6576	22.4001	NA	NA	23.5573	22.7557	23.2106	23.0781
Q8BH97	78	Rcn3	1	23.0161	NA	22.8365	22.341	NA	NA	23.1122	21.9681	22.4683	21.8392	22.4216	23.608	24.0588	23.6138	23.109	23.3466	22.7432	22.3621	23.6775	22.1707	22.3628	22.7124	NA	NA	NA	22.9304	22.4496	22.2291	21.3186	23.0377	22.7419	NA	NA	22.1548	22.22	21.5861	22.703	24.1247	24.7932	24.4013	22.9371	23.5521	24.2296	25.9024	25.369	25.5397
P26043	54	Rdx	1	21.9079	22.1073	21.498	22.2532	NA	NA	21.3095	21.6629	21.7403	22.2842	21.4621	20.4944	NA	NA	22.5071	21.726	21.6863	20.9434	22.2901	NA	21.6713	22.1315	22.1385	NA	20.7284	20.8993	21.0594	21.8341	21.8113	22.3901	22.7336	NA	NA	22.717	22.1952	21.514	21.9365	22.3388	22.1317	21.7272	NA	21.9075	21.4346	21.4154	21.7084	21.3562
Q9CQU3	39	Rer1	1	21.0135	21.2345	21.9922	21.3891	NA	NA	22.257	22.2752	21.4011	21.0712	21.4652	21.6389	NA	22.1087	NA	21.6169	21.7517	21.6648	20.9979	21.9915	21.9425	21.9424	20.9573	21.0952	21.0199	21.0839	21.9849	21.2098	21.4047	21.0655	21.249	NA	NA	21.1208	21.6109	21.2621	21.4902	21.4268	20.2015	21.8633	NA	NA	21.0934	21.3998	21.4557	21.7125
Q9QUI0	108	Rhoa	1	24.8996	24.3129	24.2928	23.6995	NA	NA	24.541	23.88	24.5616	24.1278	24.3111	24.633	24.9353	24.7262	NA	25.0453	24.9337	24.588	24.0909	24.3678	23.6847	24.0243	24.6917	NA	23.9132	23.8549	23.2256	22.9507	23.6078	23.9675	23.7473	24.4521	NA	23.8908	24.17	24.0669	24.0122	23.5249	23.69	23.1488	NA	NA	24.1077	23.2461	23.9164	23.8841
Q6Q899	57	Rigi	1	21.3906	21.3296	22.4488	21.8835	NA	NA	NA	22.3626	22.2947	21.6013	20.9323	21.8247	20.9974	20.4909	NA	21.5918	21.4889	21.6997	20.7952	NA	20.7051	20.8429	NA	NA	21.3349	22.573	21.2637	21.5592	20.9244	21.3048	21.5248	NA	21.4415	21.5839	22.056	20.8989	21.7662	21.3851	22.0592	21.883	NA	NA	21.5576	21.2665	21.9495	21.6352
E9Q555	226	Rnf213	1	22.6481	23.2028	23.3237	23.3392	23.8562	NA	24.8566	23.1906	23.066	23.1477	22.8511	22.8256	23.0204	23.0981	23.4388	23.5029	22.7613	22.3664	22.7297	22.9553	22.962	23.1693	23.31	23.1193	23.3269	23.0193	22.6034	22.696	22.2891	23.039	22.8163	23.5701	22.5091	22.7382	22.9741	22.5098	22.5961	22.5398	23.0356	23.0654	23.0537	23.3033	23.1886	22.9654	22.631	22.048
Q91VI7	104	Rnh1	1	22.8358	23.1445	22.2769	22.745	NA	NA	22.5171	22.2182	22.433	22.9509	23.205	22.8741	23.4612	NA	NA	22.5795	22.6767	22.4653	22.8938	22.7691	23.1641	21.8874	22.811	22.9262	22.861	22.4171	22.1723	21.7753	22.398	22.3032	22.7067	NA	23.6511	23.2558	22.2651	22.3516	23.0321	22.3548	21.9722	22.2447	NA	NA	22.3775	22.6099	22.0411	22.2135
Q6ZWV3	81	Rpl10	1	23.4774	22.6417	22.6161	22.8715	NA	NA	23.0294	22.2333	22.9234	22.7619	22.6871	23.0774	23.1603	23.1288	NA	23.5964	22.6472	22.9026	22.6924	NA	22.2834	22.7811	22.9163	22.9082	23.2306	22.7347	23.2899	23.36	22.6889	22.3612	21.1993	NA	NA	22.6373	22.4054	22.4689	22.3964	23.1253	22.3754	22.481	NA	NA	22.3206	22.7864	23.0717	22.9039
P53026	176	Rpl10a	1	24.8984	24.6546	23.7846	24.844	23.5986	24.3105	24.3432	24.503	24.8682	24.08	24.4	23.9063	24.3054	24.5157	24.254	24.1319	24.1103	24.0254	24.4378	23.438	24.0148	24.6744	24.2219	24.558	23.9586	24.4311	24.6041	24.3013	24.3898	24.0361	24.6194	NA	24.8143	23.8476	24.2633	24.4749	24.715	23.9547	24.1693	24.1828	23.8241	24.1521	24.0774	23.8993	24.1355	23.9153
Q9CXW4	149	Rpl11	1	25.1463	25.1601	24.3667	25.0659	24.8951	25.3102	24.5025	24.9515	25.234	25.3099	24.6893	24.4584	24.0133	24.2066	NA	24.3742	24.6542	24.6823	24.6766	23.8322	24.5302	24.4456	24.1181	24.5951	24.2862	24.7831	25.0612	24.8205	24.9956	24.4435	25.0126	24.2364	NA	24.7217	25.1602	24.5196	24.9964	25.2338	24.4291	24.7585	24.5765	24.5823	24.6545	24.4038	24.8144	25.0633
P35979	174	Rpl12	1	25.6813	25.1216	24.976	25.523	25.2414	24.9117	24.7929	25.2781	25.7131	25.23	25.6332	25.1423	24.5698	24.7914	NA	24.9927	25.2946	25.3914	25.439	24.6083	25.5258	25.309	24.7339	24.7042	24.7702	24.9557	25.867	25.4293	24.9778	25.1368	24.9138	24.1153	24.6788	24.7333	25.36	25.7516	25.3261	24.7119	25.5414	25.2552	24.7781	NA	25.5078	25.2032	25.3166	24.7626
P47963	211	Rpl13	1	24.703	25.1311	25.1525	24.9356	24.3925	24.3301	24.1636	25.0207	25.5111	25.5372	25.3852	25.3695	24.1956	24.8575	24.0664	24.6466	25.0971	25.4306	25.6265	24.0467	25.1815	24.8394	25.0559	24.4205	24.9572	25.3407	25.5441	25.7519	25.5667	25.5362	25.3008	24.0002	24.3579	25.1934	25.3442	25.5648	25.6264	25.2656	25.4051	25.3207	24.5757	23.4284	24.9062	24.9711	25.2843	25.4875
P19253	142	Rpl13a	1	24.6997	24.264	24.4304	24.3528	24.3384	NA	24.2062	24.1515	24.1369	24.4787	24.7733	24.4391	25.3031	24.4043	24.5072	24.2626	24.296	24.1279	24.509	23.4771	24.3266	24.199	23.7801	23.7941	23.6356	23.9899	24.8483	24.3769	24.3699	24.7327	23.9224	23.8514	24.4277	23.6367	24.5484	24.5267	24.3717	24.2091	24.217	24.2405	23.878	24.0369	23.9665	23.9026	24.5291	24.5483
Q9CR57	120	Rpl14	1	24.5541	24.4984	24.5004	24.3653	NA	NA	24.184	24.7899	24.6582	24.3237	24.9366	24.1879	24.2736	24.8905	23.6673	24.6731	24.3821	24.203	24.6205	24.3487	24.241	24.0949	24.1773	24.2975	24.2771	24.7394	24.6644	24.1864	24.7253	24.0657	24.5538	23.8482	NA	24.2234	24.8553	24.7078	24.7837	24.5924	25.0736	24.9685	24.2419	24.6932	24.5737	24.1266	24.6548	24.4898
Q9CZM2	164	Rpl15	1	25.4568	25.366	25.4247	25.253	24.8541	24.9427	24.4921	25.0796	25.7143	25.4784	25.5886	25.2446	24.6168	25.0313	24.7101	25.2146	24.9578	25.4499	25.348	24.6235	25.2741	25.3765	24.6974	24.8546	25.0698	25.3146	25.6045	25.3992	25.2477	25.1622	25.6007	24.9287	24.5737	25.4722	25.5119	25.5087	25.1688	25.525	25.3748	25.1922	25.1886	25.292	25.1693	25.2447	25.5299	25.2498
Q9CPR4	168	Rpl17	1	24.4921	23.8671	24.0551	24.0227	24.5822	NA	23.9763	24.3998	24.339	24.5388	24.7678	23.6181	25.4728	23.7793	25.1863	23.701	23.8207	24.1591	24.5938	24.1325	24.115	24.266	23.9976	24.6853	24.1442	24.09	24.6118	24.6775	24.6144	24.2948	24.347	25.9299	25.1851	24.0291	24.1478	24.2577	24.7055	24.4472	24.654	24.8112	24.1922	24.5297	24.1143	24.2844	24.5483	24.3307
P35980	107	Rpl18	1	24.7182	24.315	24.3123	24.6835	NA	NA	24.1616	24.388	24.8193	24.3465	24.6216	24.1541	24.2549	24.1486	24.205	24.7307	24.3769	24.1105	24.4917	24.174	24.7933	24.6143	24.198	24.2399	24.3464	24.8076	24.9331	24.8166	25.0261	25.0267	24.6254	24.015	25.5895	24.2954	24.9576	24.7519	24.7954	24.7149	24.389	24.8729	24.6684	24.6859	24.5231	24.2076	24.7382	24.5717
P62717	93	Rpl18a	1	24.0192	23.4392	23.0579	23.5547	NA	NA	22.9496	23.8956	23.5844	23.5664	22.9606	22.5338	23.8351	23.272	NA	22.6076	22.992	22.9504	22.9614	NA	23.0252	23.7382	23.5892	23.8603	23.3698	23.0528	23.3239	22.7562	23.5323	23.179	23.3722	23.6724	23.7836	23.4904	23.8105	23.3944	23.3615	23.2163	23.8759	23.7046	NA	23.9328	23.4643	23.0642	23.2749	22.6829
P84099	42	Rpl19	1	23.8377	23.6933	23.4545	24.0617	NA	NA	22.4758	23.7058	23.6024	23.6466	23.8774	24.1464	23.1802	23.9692	NA	23.6695	23.6551	23.6213	23.9275	22.8843	22.932	23.7473	23.9668	NA	23.9242	23.0119	23.7258	23.5978	23.5667	23.5123	23.4829	NA	23.4637	23.3543	23.3176	23.4135	23.9097	24.4764	24.1193	24.1184	NA	23.5716	23.9951	23.0426	24.1675	24.3322
O09167	77	Rpl21	1	22.7647	22.3862	22.4624	22.2391	22.6752	NA	22.1482	22.8869	22.5908	22.6711	22.7185	22.3914	22.5664	22.6331	NA	22.7397	21.9039	22.3948	22.5557	22.7127	22.7154	22.829	22.9531	22.4647	22.0133	22.6847	23.1914	22.6943	22.8758	22.4641	22.984	22.9166	22.7167	23.1102	22.6472	21.9552	22.6895	23.1708	23.0285	22.1588	NA	NA	22.5163	22.9279	22.7213	22.6604
P67984	58	Rpl22	1	23.3677	22.8078	23.9592	23.503	22.7313	NA	22.778	23.6979	22.9886	22.7694	22.5545	23.6475	22.1564	23.7474	NA	23.1978	22.638	22.1192	21.972	NA	23.8723	23.5579	23.3506	22.979	23.2591	24.0646	22.6327	22.5564	22.3504	23.458	22.8492	NA	NA	24.1661	23.5005	22.6285	22.0444	22.8471	23.56	24.0409	NA	NA	23.2437	22.8823	22.8129	23.2644
P62830	113	Rpl23	1	23.9441	23.8061	24.0531	23.8271	23.0484	NA	23.4043	23.5328	24.3617	23.8275	24.0428	23.9628	23.8838	23.3916	23.4564	23.5456	23.8809	24.2346	24.2648	22.901	24.2486	24.143	23.1183	NA	23.6313	23.8219	23.8773	24.375	23.9535	23.9425	23.7347	23.2618	NA	23.9763	24.0231	24.2454	24.2504	24.3667	23.9127	24.0518	23.5239	23.1693	23.39	23.6867	24.2669	24.1105
P62751	103	Rpl23a	1	25.2186	24.85	25.0781	24.8706	25.0733	24.7	24.124	25.1267	25.1519	25.1043	25.5957	25.0756	24.4894	24.6168	NA	24.6143	24.7781	25.71	25.3617	24.2144	24.9094	25.0808	24.4851	24.8135	24.6707	24.9847	25.7371	25.3961	25.3605	25.1635	24.9308	24.2892	24.9663	24.479	25.0474	25.828	25.7617	26.0671	25.5863	25.7408	26.2542	24.8431	24.688	24.9621	25.8701	25.6464
Q8BP67	154	Rpl24	1	24.3365	24.0588	23.59	23.9997	24.2911	NA	23.7922	24.4617	24.5954	24.1766	24.1096	24.0988	23.1139	24.6931	NA	23.941	23.8341	24.014	23.8511	22.8362	24.3277	23.5929	23.7776	23.1712	24.1038	23.9014	24.6304	24.4979	23.6875	23.8974	23.9886	23.8675	23.7797	23.9853	24.0597	23.9885	24.3271	24.9393	24.5308	24.4863	23.1777	23.6813	23.9801	23.9625	24.3728	24.0428
P61255	84	Rpl26	1	24.2096	24.1065	23.9163	23.423	23.8283	NA	22.921	23.8001	23.8789	23.9956	24.3439	24.2288	23.7558	24.1506	23.4105	24.186	23.6895	24.3426	24.5766	22.9509	24.1301	24.4233	23.145	NA	23.9051	24.0366	24.7246	24.458	23.8624	24.1671	23.1913	23.3539	NA	23.3673	23.4398	23.8336	23.6563	24.7916	24.9234	24.4692	23.4901	NA	24.3754	24.34	24.5589	24.7469
P61358	136	Rpl27	1	25.0467	24.8416	25.0041	25.0749	24.6507	25.1787	24.8088	24.7699	25.1164	24.7855	25.1744	24.7177	24.4535	25.1626	23.9804	25.2771	25.3053	25.3954	24.9331	24.8388	24.9977	24.7816	25.0376	24.3516	24.892	24.8561	25.2201	25.2629	25.8109	24.9916	24.9963	24.2066	NA	24.6827	25.6814	25.4159	25.382	25.1759	24.9987	25.0222	24.9608	24.7958	25.2207	24.7868	25.0324	24.8884
P14115	65	Rpl27a	1	24.5796	23.3851	24.1019	23.9599	24.5216	NA	23.2971	24.0807	24.2002	24.253	24.6595	24.6563	NA	24.5183	NA	24.2825	24.0249	24.6828	24.6286	23.0226	24.5364	24.1042	24.0569	NA	24.0613	24.9157	24.663	24.6168	24.1446	24.5007	23.8368	24.0978	23.7982	23.8674	24.2067	24.8514	24.6105	24.3516	24.4	24.0322	23.5873	NA	23.7552	23.8346	24.5001	24.3074
P41105	110	Rpl28	1	24.7928	23.8764	23.854	24.3269	23.8702	23.8729	24.1356	24.2864	24.3292	24.4452	24.9313	24.4878	24.0005	24.821	23.6773	24.4156	24.1937	24.8021	24.6853	24.4237	24.9644	24.8281	24.945	24.7097	24.8924	25.1552	25.4216	25.1916	24.3274	24.597	24.0164	23.8466	24.3159	24.3595	23.9767	24.386	24.294	24.4146	24.1797	24.7385	24.0731	24.2503	24.0438	23.9212	24.2417	24.4025
P47915	61	Rpl29	1	23.6954	24.7725	24.6295	24.4825	24.537	23.58	23.2839	24.3273	24.2764	24.4645	24.7929	24.5345	23.4607	24.0022	NA	24.0604	24.0283	24.7011	24.5335	22.5125	23.6745	23.4775	23.6501	22.6459	23.5753	23.5121	24.5753	24.023	24.4038	24.4118	24.2419	22.5948	NA	23.9502	24.438	24.758	24.6649	24.6373	24.0405	24.3725	23.4032	NA	23.9698	23.6051	24.5931	24.1877
P27659	209	Rpl3	1	24.569	24.0163	23.6633	24.3548	23.8554	NA	23.6196	23.8108	24.1353	23.6503	24.0663	23.9505	23.7518	23.8732	25.0025	24.1091	23.971	24.0274	23.6782	23.2884	23.7498	23.3167	23.4515	24.5777	23.6263	23.7008	23.9399	23.8816	23.8279	23.9434	23.4725	23.6633	23.9575	23.5394	23.6297	24.0809	23.9855	24.1207	23.699	24.1074	23.2312	24.3021	23.6875	23.6614	23.834	23.9545
P62889	124	Rpl30	1	24.3142	24.1184	24.4109	24.6837	NA	NA	24.2578	24.5848	24.2377	24.5801	24.1487	23.5143	24.6034	24.4193	23.9417	24.7546	24.0445	23.7277	24.2028	23.9944	23.5263	23.3733	23.8886	23.7949	23.6205	23.9442	23.6821	23.405	23.7041	23.9363	23.888	24.1526	24.1462	24.0044	23.9272	23.8059	23.516	24.1267	23.9217	23.9497	24.75	24.5487	23.8832	23.6567	23.5779	23.7184
P62900	174	Rpl31	1	24.8481	24.9649	25.8821	24.5987	24.643	24.9643	24.3534	25.1057	25.7841	24.9436	25.2406	25.5156	24.6892	25.3463	24.6013	24.7348	24.7577	25.7213	25.2268	24.2666	24.7698	25.2552	24.841	24.7438	25.0609	25.0249	25.5798	25.1679	25.2274	25.2344	25.1452	24.3418	24.3992	25.015	25.3804	25.9291	25.4008	24.9961	25.4586	24.5437	24.37	24.6335	24.6107	24.6444	25.3679	24.9495
P62911	99	Rpl32	1	24.634	23.6245	23.6472	23.9799	24.3258	24.5293	23.9775	24.3496	24.1539	24.295	24.1544	24.0533	23.7137	24.0533	23.3524	24.2059	23.6985	24.0336	24.1478	24.0821	23.4449	23.0837	23.8632	24.1648	23.5967	23.5339	24.1791	23.7048	23.8648	23.7703	24.1462	24.6077	23.9486	24.1049	23.9643	24.4855	24.1561	24.3815	23.8176	23.9893	23.5712	24.4895	24.033	24.04	24.0278	23.9546
Q9D1R9	110	Rpl34	1	23.6446	23.1346	23.0738	23.4035	NA	NA	23.4607	23.5446	22.962	23.3738	23.5548	22.8666	23.4356	23.1286	NA	23.4763	23.0317	23.6357	23.3954	22.7728	22.8686	23.2434	23.0665	22.6442	23.0283	23.2094	23.438	23.4886	23.2861	22.9433	22.8727	NA	22.8731	23.1963	23.0771	23.0891	23.3445	23.2971	23.2579	23.1648	23.0712	23.2122	23.077	22.8246	22.8057	22.9479
Q6ZWV7	26	Rpl35	1	22.6764	23.3836	23.7039	23.5503	23.348	NA	22.2352	23.3429	23.7657	23.655	23.6656	22.8783	22.0848	22.8311	NA	22.8492	22.7214	23.0883	23.1846	NA	NA	NA	NA	NA	NA	NA	NA	NA	NA	NA	NA	NA	NA	NA	NA	NA	NA	24.187	23.6218	24.0498	22.0934	NA	23.7945	23.246	23.9766	23.9337
O55142	124	Rpl35a	1	23.9728	23.1142	22.8866	23.2172	NA	24.0536	23.8027	23.408	22.9983	23.5389	23.7569	23.7317	23.3842	23.6419	24.8868	23.2894	23.645	23.6454	24.0561	23.4859	24.1122	23.2517	22.9001	23.739	23.1211	23.3038	23.717	23.5561	24.5563	24.2759	24.2466	25.5136	24.8796	24.3367	24.2675	23.9367	24.4427	23.6737	23.6875	23.3216	23.6031	23.5758	23.5309	23.7806	22.9917	23.0279
P47964	44	Rpl36	1	22.8507	23.365	23.0004	23.6372	NA	NA	NA	22.6263	23.4775	22.4225	23.0834	22.5845	21.5315	22.7988	NA	22.609	22.2869	22.3803	23.0539	NA	22.5657	22.6516	22.7989	NA	23.0599	22.4012	22.8372	22.4078	23.4472	23.3301	22.9364	NA	NA	22.9008	22.9693	23.0841	22.9396	23.2359	23.1484	22.9414	NA	NA	22.4889	22.6599	22.7566	22.7422
P83882	47	Rpl36a	1	23.5826	22.887	23.1243	23.1255	23.2091	NA	23.393	22.9526	23.1824	23.1474	22.8996	22.8644	NA	21.8186	23.2683	22.8329	22.4099	23.0457	22.9838	NA	22.9916	22.7802	22.4018	22.6807	22.9546	22.6044	23.2385	22.9746	23.2161	23.3469	22.5891	22.6333	23.1637	22.7761	22.7859	23.2821	22.8491	23.2186	23.525	22.916	22.8364	22.6006	23.0015	22.8092	23.1639	23.0577
Q9D823	34	Rpl37	1	22.9739	23.2022	23.0271	22.9383	22.7427	NA	22.2432	22.6872	23.0083	22.7112	23.8969	23.5894	21.3735	23.191	NA	23.1499	22.6664	23.1811	23.2576	22.6282	24.2739	22.6578	23.343	NA	22.766	22.706	23.1155	23.0472	23.4767	23.6327	22.9034	22.5309	NA	23.0225	22.7715	23.6551	23.2159	23.8302	24.2876	23.5158	22.6649	22.38	23.0017	22.3687	23.2076	22.9552
Q9JJI8	66	Rpl38	1	24.1996	24.1984	23.9902	23.8517	NA	NA	23.1259	24.1479	24.1924	23.522	24.2893	23.8119	23.9149	23.7313	23.1635	23.2664	23.4278	24.5451	23.6065	22.1705	23.5043	23.3963	23.7094	NA	23.7192	23.491	23.8189	24.3369	24.2273	24.1156	24.0766	NA	NA	23.7003	23.7896	24.4406	24.5726	24.68	24.5664	24.2672	23.1422	24.022	24.035	24.3566	24.5489	24.5297
Q9D8E6	347	Rpl4	1	25.5044	25.3255	24.7417	25.0312	25.0739	NA	24.61	25.0886	25.3615	24.7954	25.4965	25.0205	24.8826	24.7998	25.6488	24.8533	24.8441	24.8252	25.2804	24.9878	24.7795	25.2598	25.1587	24.6499	24.7499	25.0634	25.5342	25.3232	25.231	24.9718	25.114	24.6241	24.6858	24.705	25.3211	25.4332	25.6228	25.4278	25.4818	25.4078	24.8112	24.1631	24.9046	24.7585	25.3487	25.2766
P47962	169	Rpl5	1	24.7698	23.9511	23.7219	23.8465	NA	NA	23.6168	23.4462	24.339	23.8178	24.0119	23.9007	NA	23.8133	NA	23.651	23.8277	23.3638	23.8387	23.583	23.3326	23.3907	23.3433	NA	23.2655	23.5534	23.7085	23.676	24.0357	24.3616	24.2956	23.9018	NA	23.8139	24.4384	24.2426	24.5308	23.8969	23.8105	24.0351	24.2881	23.566	23.9016	23.4691	24.1504	23.8447
P47911	274	Rpl6	1	25.4129	24.5809	24.5851	25.0723	24.4023	NA	24.4548	24.8958	25.0795	25.2951	25.3838	24.8444	24.5097	25.2091	24.2402	25.1899	25.0669	25.0719	25.3757	24.7498	25.3199	25.5453	25.1755	25.557	25.5042	25.3924	25.5706	25.6474	25.27	25.0912	24.8382	24.208	24.4978	24.907	25.0295	25.2456	25.5298	25.1929	24.9093	24.8215	24.3271	25.0869	24.6386	24.791	25.0881	25.3107
P14148	281	Rpl7	1	25.1227	24.9792	24.6593	25.0282	24.135	NA	24.4524	25.2314	25.0629	24.6761	25.1438	24.6577	24.2336	24.0535	NA	24.5817	24.7663	24.5301	24.776	24.6286	24.3852	24.9586	25.0275	24.4841	24.6727	25.1237	25.0912	25.1519	25.359	24.5802	24.7868	24.4281	23.8686	24.9472	24.8384	24.9277	25.2749	25.0503	24.9814	24.949	24.6237	24.1091	24.6109	24.6686	24.9725	25.05
P12970	190	Rpl7a	1	25.2039	25.2138	24.8135	25.218	24.7962	NA	24.803	25.6183	25.1888	24.9848	24.7076	24.4076	24.5487	24.6881	25.2271	24.3551	24.3346	24.6184	24.5467	23.891	24.4921	24.2465	24.2079	24.5231	23.3864	24.7057	24.5411	25.1287	25.0724	24.6495	24.6192	24.2934	24.0713	24.1912	24.782	25.0345	25.1357	24.7352	24.3084	24.2612	23.7636	24.0407	24.3083	24.5548	25.0775	24.7341
P62918	110	Rpl8	1	25.1958	25.0104	24.8818	25.0285	24.4476	NA	24.6653	25.0615	25.2199	24.9115	25.1887	25.0342	24.2409	25.0146	24.1929	25.3075	24.6865	24.838	24.9559	24.4894	25.2978	25.0638	25.2756	24.2765	25.2178	24.9172	25.3527	25.2284	25.2041	25.1854	25.2416	24.4337	24.2588	25.0344	25.2515	24.7305	25.368	25.3317	25.5022	25.3181	24.7815	23.9559	25.4943	25.0497	24.8539	24.8171
P51410	169	Rpl9	1	24.6604	25.3152	24.7732	25.1273	26.0388	NA	24.6146	25.4856	25.1258	25.3815	24.8475	24.2514	24.2909	25.1019	NA	25.0961	24.7057	25.0851	25.5757	23.9881	24.8503	25.3979	25.1198	23.9376	24.7574	24.8612	25.0019	25.1185	25.0806	25.2862	24.9726	24.4359	24.7567	25.2135	25.1072	24.595	25.0182	24.9572	25.0964	25.045	24.8133	24.4194	25.1014	24.7043	24.7017	24.7202
P14869	208	Rplp0	1	25.1958	24.765	24.8502	24.9029	25.1315	24.7467	24.4508	24.985	25.3599	24.9218	25.3422	24.8568	24.045	24.4021	NA	24.9397	24.8673	24.9628	25.0029	24.2812	25.0555	24.9983	24.6046	24.5654	24.7978	25.0245	25.1509	25.0697	25.1764	24.7758	24.8252	24.3594	23.7292	24.4899	24.9205	24.6624	24.7358	24.9042	25.157	25.2069	23.9036	24.9175	25.3065	24.9272	25.173	25.0243
P47955	124	Rplp1	1	24.73	23.9241	23.0324	22.9113	NA	NA	NA	22.9259	24.1021	23.2789	23.2755	22.9024	24.3503	23.7992	NA	23.8791	22.9869	23.3454	23.3566	24.2111	25.2456	23.0858	25.3178	NA	23.7144	23.725	23.5789	23.6775	23.1284	22.8865	22.5566	NA	NA	22.5164	22.9489	23.3887	23.1866	22.4629	22.8965	22.6363	23.3164	NA	23.9091	22.9221	23.9138	23.7097
P99027	174	Rplp2	1	26.0824	26.4873	25.2331	25.6387	NA	NA	25.5041	25.8863	26.4922	26.0359	26.0908	24.899	24.5712	24.6875	NA	25.3398	25.8413	25.8652	26.1717	25.9431	25.2793	25.4395	25.9569	NA	25.5061	25.8235	26.4606	26.4041	25.8888	25.4574	25.3093	NA	NA	25.1214	25.0863	25.6284	25.9295	25.6186	25.5163	25.2926	25.3223	NA	25.4233	26.0059	26.7327	26.1076
Q91YQ5	491	Rpn1	1	24.7453	24.1215	24.2259	24.5741	24.919	NA	24.9085	24.1631	23.928	24.6323	24.5138	24.6265	23.9929	24.5704	23.6075	24.472	24.5822	24.2275	24.8108	25.023	24.5621	23.9589	24.1196	24.2583	24.4177	24.3883	24.3955	24.4113	24.6647	24.4993	24.1755	24.9463	23.7469	23.9094	24.1463	24.6434	24.7594	24.6258	24.2372	24.281	24.5233	NA	23.998	24.3055	24.4295	24.8668
Q9DBG6	260	Rpn2	1	24.1678	24.0268	24.4534	24.1927	NA	NA	23.9527	23.5654	23.6316	23.797	23.4992	23.733	24.3934	23.6247	25.2128	23.6432	23.3825	23.7551	23.9713	24.4116	23.8346	23.6321	23.7119	24.2196	24.0158	23.9233	23.9422	23.9373	24.2509	24.0505	23.6873	24.2527	26.1015	23.6584	23.6199	23.8914	24.1	24.4857	23.7695	23.6861	24.1949	24.2726	23.4123	23.3882	23.8891	24.0344
P63325	134	Rps10	1	24.1878	24.439	24.8843	24.6225	NA	NA	24.7086	25.2148	24.8648	24.8876	24.3494	24.4018	24.4108	24.5362	23.9421	24.6429	24.4579	24.6899	24.8367	24.5337	24.1459	25.0318	24.0182	24.244	23.9335	24.3875	24.4824	24.0596	24.2455	24.1313	24.3535	23.5222	24.6379	23.9415	24.7139	24.4634	24.4499	24.2373	24.1972	24.4154	24.129	24.1359	24.3589	24.1865	24.7908	24.265
P62281	171	Rps11	1	24.8907	24.1716	24.435	24.1417	23.4209	NA	23.7863	24.176	24.2667	24.6746	24.7198	24.7359	24.15	23.9902	24.8017	24.2236	24.6216	24.8746	24.4865	23.7089	24.3805	24.0417	23.6931	23.6955	24.1046	24.1656	24.7396	24.6179	24.4924	24.6268	23.5164	24.3974	24.4638	23.5107	24.4339	24.4565	24.4794	24.7024	24.619	24.4546	22.9412	24.1577	24.0167	24.1403	24.2864	24.0862
P63323	116	Rps12	1	24.6328	24.5146	24.6904	25.0072	25.7887	NA	24.3703	24.9842	24.7573	25.0207	25.0648	25.093	24.8551	24.8062	NA	24.0426	24.2193	24.8798	25.1779	23.956	24.1909	24.262	24.4988	23.9664	24.4926	24.3294	25.1786	24.5079	24.7102	24.3363	23.9986	23.3758	23.9065	24.4686	24.2825	24.9409	25.1781	24.1234	24.8575	24.9078	24.1896	24.1834	24.7026	24.4028	24.893	24.518
P62301	139	Rps13	1	24.92	25.1928	25.1542	25.4352	24.3678	24.2091	24.2373	24.8134	25.4745	25.0291	25.2861	24.7681	24.1091	24.7327	24.0627	24.415	24.186	25.0501	25.2675	24.0762	24.8232	24.9779	24.6001	23.8061	24.9169	24.6616	25.3127	25.234	25.5334	25.4357	25.2662	24.5068	24.0475	25.0201	25.3609	25.7659	25.4024	25.3494	25.2169	25.2407	23.9397	24.0076	25.1558	24.924	25.496	25.2145
P62264	101	Rps14	1	24.2917	24.463	24.146	24.3849	24.707	NA	23.4538	23.873	24.2024	23.9543	24.4311	24.8932	24.0829	24.7356	NA	24.3602	24.8001	24.591	24.0536	23.3855	23.808	24.6739	24.4725	NA	23.4416	23.5467	23.7333	24.1854	25.0295	25.7857	24.5619	NA	NA	24.2826	24.606	24.8263	24.8941	24.7716	24.3254	23.5328	24.3046	NA	23.9569	22.9676	23.0516	23.0543
P62245	140	Rps15a	1	24.7405	24.4643	24.3757	24.5935	23.6147	25.5316	23.51	24.3949	24.6325	24.5465	24.8623	24.5642	23.7154	24.4376	NA	24.1451	23.8748	24.9445	24.444	24.5296	24.1156	24.5938	24.9735	24.6612	24.7303	24.8957	24.7359	24.8041	24.6625	24.9899	24.1158	23.3854	25.4525	24.3923	24.6709	24.9266	24.5977	24.8067	24.4086	24.2481	NA	NA	24.6468	24.5603	24.5773	24.4184
P14131	134	Rps16	1	24.7732	24.3977	24.3432	25.0034	24.6887	NA	23.8607	25.0563	24.5721	24.8925	24.6652	24.5904	24.756	24.4582	23.5351	24.7176	24.5947	24.5797	25.0713	24.0351	24.2349	24.8438	24.8015	NA	24.3989	25.0955	25.3833	24.7266	25.0542	24.5588	24.9264	24.4394	25.3151	24.6339	24.9922	24.3878	24.6673	24.6069	24.9209	24.8256	24.2308	23.6042	24.542	24.714	24.5978	24.4773
P63276	90	Rps17	1	23.5328	23.9325	24.0353	23.6699	24.0418	NA	22.8679	23.5509	23.958	23.4093	23.422	23.5483	23.5172	24.0109	NA	23.4116	23.0439	23.254	23.3297	23.157	24.0467	23.2029	23.2044	22.7971	23.7045	23.4262	23.9851	24.0507	23.6039	23.5615	23.2451	22.865	23.672	22.8798	24.1194	24.1753	23.9269	22.8188	23.5222	23.0194	NA	NA	NA	NA	22.4418	22.8387
P62270	137	Rps18	1	25.2042	25.3126	25.2678	25.8798	25.0381	24.7642	24.2032	25.743	25.4461	25.855	26.1428	25.7828	24.6828	25.2847	NA	25.8208	25.4509	25.8363	25.7823	24.548	25.1744	25.8224	25.4236	24.6229	25.6713	25.7794	26.5467	26.0895	25.9784	25.6272	25.8031	24.8953	NA	25.7041	26.1986	25.9114	26.1341	25.1069	25.4873	25.2476	NA	NA	24.6764	24.6411	25.2069	24.9457
Q9CZX8	180	Rps19	1	24.7404	25.1097	24.519	25.5199	24.4408	24.6343	23.8499	25.3775	25.0752	24.7575	24.9984	25.3191	24.2197	24.864	24.201	25.1053	24.8419	24.868	25.0597	24.5471	24.2828	24.5481	24.5797	24.2867	24.1422	24.7549	25.7315	24.3303	25.2337	24.5141	25.4246	24.1274	23.9644	25.3331	25.3443	24.4422	25.3714	24.9736	25.0703	25.0664	24.2269	23.3961	24.5301	24.3482	25.0487	24.5274
P25444	242	Rps2	1	25.8332	25.3289	25.6034	25.6333	26.282	NA	24.8381	25.7128	24.9543	25.9139	25.4723	25.1381	24.9719	25.01	25.0279	25.0798	25.2263	25.8469	25.5079	24.7625	24.9656	24.9409	25.3124	25.0797	25.3482	25.2657	25.6887	25.2899	25.5365	25.5594	25.3494	24.3735	25.5666	25.2368	25.5413	25.4714	25.635	25.1907	25.3618	25.4691	24.8966	25.1117	25.3222	24.8457	25.0977	25.0635
P60867	78	Rps20	1	24.9655	25.66	25.1803	25.1153	NA	NA	24.0494	25.1718	25.3121	25.344	25.533	25.3403	25.0692	24.9643	NA	25.5102	25.4803	25.4988	26.0492	24.2934	25.3648	25.5602	25.5862	NA	25.0238	25.7682	25.8935	25.554	25.5454	25.3519	25.2959	NA	24.1819	25.3773	25.1192	25.2101	25.6103	25.5982	25.5396	25.7134	24.4333	NA	24.993	25.4065	25.3047	25.4536
Q9CQR2	55	Rps21	1	23.6403	21.2507	22.6187	22.739	NA	NA	22.1726	22.6731	22.5403	22.0393	22.4411	21.8517	22.8171	21.9737	23.0645	21.8257	22.0388	22.3857	21.8645	22.5034	21.7496	21.9544	22.1744	22.8766	22.3931	22.1634	22.3984	22.4287	22.5148	22.2289	22.4395	22.7363	22.0272	21.8825	21.9708	22.7881	22.2607	21.9682	22.7292	22.5263	22.2694	23.0872	22.3873	22.3465	22.3465	22.552
P62267	86	Rps23	1	24.5433	23.4515	24.2125	24.1086	NA	NA	23.8621	24.5221	24.4062	23.7715	24.0777	22.9918	24.7925	23.8991	24.6548	24.7331	23.3242	24.2634	23.762	23.9471	23.1708	23.1338	23.3057	25.0122	23.8998	24.4252	24.387	24.479	24.1288	22.7778	23.1399	24.544	24.361	23.8007	23.8212	24.2067	23.816	23.5261	23.6799	23.3307	24.2824	24.6099	24.2518	23.9981	23.8867	23.2377
P62849	100	Rps24	1	24.0712	23.727	23.9068	23.8359	23.3353	NA	22.7429	23.6698	23.8346	23.7783	23.7897	24.095	23.9314	23.2496	NA	23.9289	23.8445	23.9902	23.4129	22.8639	23.7086	23.4644	23.9121	NA	23.072	23.6114	24.3415	23.6889	24.0314	24.0264	23.4614	23.1641	NA	23.1651	23.4194	23.9467	23.5239	23.8077	23.895	23.8529	22.371	NA	23.3019	23.4585	23.5913	23.32
P62852	104	Rps25	1	24.1883	24.0328	23.2995	24.1099	23.7697	NA	23.0139	23.807	23.4198	23.8663	23.8166	23.8334	23.2209	23.3083	NA	24.0223	23.5972	23.8282	23.9779	23.029	23.2884	22.9799	24.1582	NA	23.3672	23.484	23.9726	23.7046	23.8668	23.1494	23.7526	NA	NA	23.8124	23.7349	23.8373	24.1213	24.2851	23.6669	23.9615	23.6861	NA	24.0644	23.4265	23.6169	23.683
P62855	43	Rps26	1	24.1611	23.4587	23.6035	23.2363	NA	NA	23.4404	23.2485	23.5622	23.5181	23.3033	23.4264	22.812	22.8303	NA	22.4745	22.5202	23.263	23.076	22.0069	23.1549	23.3692	23.0015	23.5878	23.206	22.8673	23.2241	23.3972	23.4476	22.6803	22.5755	NA	NA	22.5319	23.1829	23.6847	23.9145	22.9766	23.3424	23.712	23.2476	NA	23.047	22.8495	23.6332	23.333
P62983	134	Rps27a	1	28.4014	28.7629	29.2636	28.2181	27.7983	27.7967	28.3302	27.8194	28.7069	28.7901	28.9514	29.0243	27.4281	28.2033	28.4202	28.7176	28.3297	28.5688	28.6079	27.9716	28.2879	28.607	28.1811	27.6058	28.094	27.6508	28.1501	28.8847	28.9032	29.1251	28.3399	28.6936	27.8098	28.2714	28.1915	28.7684	28.8637	28.7339	28.1681	28.6744	27.5675	27.0149	28.4226	28.7399	28.9706	28.6521
P62858	69	Rps28	1	24.0213	22.8394	23.1634	23.0658	NA	NA	22.9313	23.5542	23.2719	23.2073	23.7037	23.9409	NA	22.7886	NA	23.1548	23.0054	23.1357	22.4774	23.558	23.558	23.7088	23.5941	NA	23.3911	23.4551	23.5534	23.5929	22.8586	23.3997	22.8958	NA	NA	22.6577	23.7534	23.9554	23.407	23.6339	23.4167	23.2566	NA	24.0395	22.9752	23.0533	23.8462	23.8942
P62908	357	Rps3	1	25.5154	24.8034	24.5771	24.9782	24.4108	24.7523	24.7252	25.2719	24.8461	25.5828	25.1753	24.7714	24.4219	24.5985	24.8844	24.8801	24.9825	25.6194	25.2058	23.879	24.7748	24.2282	24.5112	NA	24.6119	24.9946	25.0785	24.8442	25.3301	25.1336	24.8261	24.1005	24.2231	24.9349	25.5154	25.2538	25.5291	24.9226	25.1698	25.0021	24.7896	24.1863	25.107	25.1238	24.8489	24.8424
P97351	328	Rps3a	1	25.3189	24.9891	25.3301	25.3476	24.9966	25.1915	25.1427	25.2517	25.283	25.4335	25.6768	25.4581	24.2108	25.041	25.194	25.3536	25.1761	25.5634	25.3973	24.8217	25.2612	25.0672	25.0829	24.1153	25.0667	25.049	25.8104	25.5609	25.4196	25.5966	25.2905	25.0681	25.4579	25.057	25.5643	25.6652	25.4102	25.1455	25.5417	25.374	24.5422	24.5759	24.9885	24.883	25.4335	25.1878
P62702	297	Rps4x	1	25.401	25.2158	25.3709	25.0299	25.3756	24.6125	24.8952	25.0587	25.0427	25.3836	25.378	25.1558	24.3076	24.6704	23.7624	24.6357	24.7193	25.3849	24.9503	24.3185	24.9898	24.883	24.7911	24.6298	24.9587	25.221	25.7667	25.5138	25.4622	25.1522	24.8609	25.0233	24.12	24.839	25.0958	25.5276	25.4687	25.3401	24.9885	25.281	24.4014	24.4107	25.2214	25.1403	25.2614	25.2685
P97461	97	Rps5	1	24.3035	24.0728	24.0096	24.8539	23.6722	NA	23.7019	24.5402	23.9154	24.2895	24.8571	24.789	23.8059	24.2744	23.8278	24.9753	24.4609	24.583	24.5435	23.47	23.9287	24.3376	24.5938	24.0912	24.4466	24.7694	24.973	24.3795	24.486	24.2301	24.3285	23.3711	24.5178	24.3474	24.585	24.2937	24.5852	24.6721	24.9401	24.3108	23.8183	24.3279	24.6004	23.8173	24.048	23.8673
P62754	128	Rps6	1	24.5729	24.3998	24.5253	24.6602	23.9194	24.3523	23.6014	24.2236	24.5902	24.5162	24.5109	24.4711	24.0803	23.3384	23.4895	23.7785	23.942	24.3586	24.3967	23.2586	24.5709	24.6096	24.4552	23.7944	24.7753	24.3308	25.0595	24.6995	24.5591	24.9799	24.0344	23.6298	23.528	23.8539	24.5254	24.8634	24.9104	24.3682	24.4873	24.1326	NA	NA	24.4291	24.3184	24.5343	24.5207
P62082	182	Rps7	1	25.0938	25.2018	25.4226	24.9739	25.0006	25.0391	23.9791	25.1161	25.2681	25.0182	25.3132	25.3351	24.376	24.8214	23.7086	25.5383	25.1923	25.1455	25.3368	24.1704	25.0782	24.9147	25.0761	24.3044	25.3008	24.8887	25.5184	25.0634	25.3409	25.4936	25.2426	24.7961	24.3346	25.4109	25.6191	25.6298	25.7072	25.3298	25.5067	25.2219	24.0685	24.208	25.0169	24.7298	25.124	25.1578
P62242	186	Rps8	1	25.6095	25.0616	25.5463	24.9355	25.4618	NA	24.8542	25.4541	25.7956	25.6642	25.6917	25.7969	24.9347	25.239	NA	25.2286	25.0714	25.7605	25.8662	25.0845	25.5792	25.3894	25.6126	25.0415	25.2684	25.4564	25.8035	25.3679	25.3992	25.3533	25.2265	NA	NA	25.0436	25.6846	25.7868	25.7409	25.8346	25.4086	26.0634	25.1289	25.2511	25.6388	25.0528	25.4669	25.7203
Q6ZWN5	227	Rps9	1	24.747	24.5688	24.6646	24.4813	NA	NA	23.7996	24.745	24.6885	24.9413	24.9402	24.4989	23.4839	24.004	NA	23.9132	23.8175	24.8169	24.5617	23.9822	24.7607	24.4402	24.3229	23.8416	24.3913	24.6228	25.2346	24.71	25.1261	25.0073	24.4609	23.8637	23.8088	24.0266	24.7484	24.9643	25.3885	24.9102	24.8363	24.8826	24.858	24.4436	24.5929	24.5491	24.7972	24.5024
P14206	254	Rpsa	1	25.1659	23.7862	24.1647	24.0444	NA	NA	24.8702	23.8642	24.4566	23.2768	24.3967	23.8557	24.5013	24.4158	25.1659	24.3731	23.949	23.7928	23.9419	24.2977	23.7891	23.7776	24.2572	24.7611	24.6217	24.0591	24.53	23.6452	24.2345	23.8838	23.4261	25.1307	NA	24.5595	24.004	24.656	24.0652	23.6569	23.6254	23.6855	24.8986	25.1546	23.2615	23.9058	24.2131	24.1903
P10833	41	Rras	1	20.8721	20.7029	20.3762	19.8303	22.0133	NA	20.5244	20.424	20.1875	20.2595	20.7322	21.2473	NA	21.4178	NA	21.4591	21.5571	21.1132	22.0316	NA	20.4624	21.0743	20.8178	NA	20.7285	20.9482	20.0585	20.9271	21.0678	21.0592	NA	NA	NA	21.1912	20.6989	20.4109	21.1297	20.4165	NA	19.7765	NA	NA	20.3745	20.8623	20.8984	21.328
Q99PL5	752	Rrbp1	1	24.0828	24.2807	24.2259	24.3094	23.9445	NA	24.1419	23.6395	24.1888	24.4653	25.0404	24.3686	24.5279	24.5568	23.8245	24.0305	24.2895	24.5828	24.5698	24.0686	24.0988	24.4562	24.3579	24.146	24.0262	23.9287	24.8283	24.147	25.2221	24.2974	24.4988	23.8389	24.5152	24.1846	24.0786	24.9358	25.3083	24.6015	24.5413	24.3872	24.3033	23.8232	24.3171	24.4251	24.7641	25.0034
P07742	86	Rrm1	1	22.5533	21.9812	22.1873	22.6986	NA	NA	NA	22.2088	22.5846	22.5977	21.2069	22.104	NA	NA	NA	22.6332	22.2537	22.1895	22.2276	22.7292	22.5959	22.3435	22.8699	NA	21.9453	22.5814	22.7029	21.7298	22.6659	23.1291	21.1942	NA	NA	21.9514	22.4471	22.8336	22.3499	22.2607	22.6588	23.2054	22.7772	22.6663	22.7504	22.0448	22.4423	23.0337
Q8BVY0	48	Rsl1d1	1	21.6593	21.4243	NA	NA	NA	NA	NA	NA	NA	21.8121	22.3994	21.8216	22.3714	NA	NA	22.5375	22.1507	22.0059	21.6058	NA	21.0392	NA	NA	NA	20.7763	20.006	20.9699	22.1092	22.01	22.0015	22.2644	22.169	NA	21.7325	21.9609	21.5673	21.7476	NA	20.1157	20.9164	NA	NA	NA	21.4398	21.1146	20.4307
Q99LF4	35	Rtcb	1	21.308	20.7025	21.2418	20.7711	NA	NA	NA	NA	20.9949	21.4404	20.9224	20.9466	NA	21.6961	NA	21.3378	21.0618	20.8303	20.1583	NA	21.6056	21.1744	NA	NA	20.8019	20.9089	21.0913	21.0554	21.1903	21.6654	NA	NA	NA	21.498	21.8553	21.6278	21.4862	21.4511	20.9167	20.8902	NA	NA	NA	21.0076	21.3143	21.3144
Q9ES97	64	Rtn3	1	25.5004	22.5891	23.8925	23.4319	NA	NA	23.8739	23.7232	22.4499	23.0907	25.7388	26.0442	24.8342	25.2307	24.6935	25.4436	25.4858	25.7122	25.259	25.4376	24.6545	24.396	25.1355	NA	24.8304	24.1247	24.3181	24.8419	24.7131	25.248	25.0832	25.5355	25.3467	25.4272	24.7104	25.4118	24.897	25.1171	24.1901	24.7208	24.8404	NA	25.287	24.9282	25.1734	25.0436
Q99P72	117	Rtn4	1	23.7683	23.4584	23.7822	24.5871	23.9981	NA	23.95	22.7647	24.2589	23.6076	23.9005	23.2886	NA	23.5056	NA	24.3026	23.5053	23.9707	24.6244	25.0946	22.7901	23.9263	23.9257	NA	24.0319	24.3094	24.7571	24.3754	23.6503	23.5069	23.4601	23.3896	23.8167	23.5335	23.5871	23.6087	24.1462	24.0557	23.3962	24.0503	23.9618	23.5213	23.6752	24.1414	23.9979	23.6453
Q9CQE8	64	RTRAF	1	21.4947	21.3172	22.1262	22.1865	NA	NA	21.1187	22.4507	21.9045	21.9094	22.4848	22.3713	23.2454	21.1657	21.2933	21.6323	21.8752	21.8143	21.8858	20.8663	21.5725	22.3323	21.5702	22.0281	21.9831	22.0844	21.934	22.3685	23.1096	21.5122	24.3359	NA	NA	25.1922	21.1209	21.389	21.2957	21.863	21.9583	21.2001	21.886	21.9722	21.0574	22.2149	21.4696	21.8333
P60122	106	Ruvbl1	1	22.6315	22.3343	22.4004	22.1382	NA	NA	22.6862	22.5178	22.3253	22.6239	21.8402	22.3094	NA	NA	NA	22.5455	22.3165	22.2826	22.2388	24.0646	22.9161	22.9579	NA	NA	22.9785	23.2015	22.4706	22.8193	22.663	22.5898	23.2169	NA	NA	22.9986	22.6365	22.3926	22.7123	22.9803	22.5573	22.6076	NA	23.7866	22.8064	23.0306	22.5544	23.094
Q9WTM5	84	Ruvbl2	1	22.1456	22.0999	22.6788	22.128	NA	NA	22.5072	22.872	22.7627	21.801	22.4294	21.8651	23.0241	22.4327	NA	22.2658	22.7545	21.9641	22.0958	22.1568	22.5008	21.8179	22.0587	NA	22.0903	22.4511	22.3791	22.4459	22.2092	21.8483	22.686	NA	NA	22.4039	21.7076	21.9281	22.3018	22.4102	22.5467	22.59	NA	NA	22.3876	22.2244	22.5132	22.4403
P08207	31	S100a10	1	24.4791	24.796	24.0835	24.0548	23.9102	NA	23.0617	24.1015	24.8538	25.2374	24.8588	23.6791	23.4969	23.4059	NA	23.2342	24.4313	25.35	25.2761	23.8869	24.0396	24.6014	24.8693	24.4533	24.2552	24.8222	25.1148	25.383	25.2737	23.8673	24.4945	23.1141	22.9275	23.7543	24.8709	25.1454	25.0704	25.831	25.12	24.9424	23.1665	23.314	23.6639	25.4561	25.9735	26.2112
P50543	111	S100a11	1	25.8483	26.0727	26.0913	26.0187	25.7499	NA	25.1672	25.4879	26.4826	26.1415	27.1187	26.2836	25.2577	26.3887	25.8029	25.6648	25.6461	26.4251	26.5956	24.0785	25.1477	26.1072	25.7921	24.4107	25.7905	24.9197	26.1132	26.4426	26.8471	26.586	26.1786	24.6284	24.4654	25.5569	25.7835	26.435	27.172	27.0937	26.0409	26.3319	24.3174	24.2635	25.1965	26.1034	27.1216	27.0046
P97352	31	S100a13	1	20.8503	NA	NA	NA	NA	NA	NA	NA	NA	NA	21.083	19.8439	NA	NA	NA	20.4834	20.1043	19.9282	NA	20.6638	NA	21.3671	NA	NA	20.7053	19.9158	20.6884	NA	20.363	NA	21.1866	NA	NA	20.8145	20.5516	20.4242	20.5623	19.7517	20.7037	20.6845	NA	NA	19.6019	20.7312	19.9809	20.5752
P07091	91	S100a4	1	24.3947	24.8243	23.4696	22.8839	24.9279	NA	23.213	22.2608	25.1193	25.4248	25.8882	21.9714	23.7071	24.3375	NA	24.4912	25.4985	25.4419	25.9929	24.2003	23.6905	25.8441	25.6552	NA	24.8022	23.8196	23.9977	23.9928	25.0645	23.0856	24.2209	NA	NA	24.6676	24.7961	25.3099	25.7399	27.4566	23.9774	26.7243	NA	23.1283	24.3084	25.6361	26.4502	27.3033
P14069	110	S100a6	1	27.2337	26.8649	27.5978	27.124	26.473	27.0946	26.1961	27.2953	27.9277	27.4776	27.4304	27.8387	26.4649	26.9953	26.2578	26.7392	27.8786	27.4998	27.6589	25.0706	26.9071	27.9607	26.6799	26.1522	27.8328	26.719	26.2107	27.2919	26.9974	27.4756	27.6322	26.6733	25.3625	27.7395	27.2069	26.0131	27.3472	28.0693	27.8794	27.9703	26.177	26.0487	27.2949	28.4943	27.209	27.3748
Q9R1T2	42	Sae1	1	20.8409	21.4644	21.1756	21.095	NA	NA	20.8262	20.748	20.9338	20.5829	20.5653	21.2282	NA	20.2794	NA	19.87	20.9839	20.6717	19.6953	NA	NA	NA	NA	NA	20.6373	19.8692	20.2968	21.5014	20.0687	20.6263	20.9391	20.7318	NA	20.4527	19.6527	20.4468	20.726	20.4563	20.6338	21.0085	NA	NA	21.0081	20.8803	20.3998	20.5488
Q60710	89	Samhd1	1	22.4288	22.3288	22.2623	22.5136	NA	NA	NA	23.0094	22.7033	22.7097	22.8676	22.7177	22.8426	22.9626	NA	22.4184	22.9695	22.5849	22.1656	22.3538	23.5548	22.7501	NA	23.1468	22.0896	23.0002	21.9346	22.4488	22.4431	22.5985	22.298	NA	NA	22.6381	23.0658	22.8042	23.3251	21.5387	21.9616	23.0489	NA	NA	21.7779	23.0166	22.466	22.2673
O55128	49	Sap18	1	22.0458	22.8713	23.6445	22.9493	NA	NA	23.2699	22.5052	22.8794	23.5256	22.5443	22.506	NA	22.2352	NA	22.5306	22.5754	21.4229	22.0003	22.7814	23.2082	22.3978	22.8476	22.6895	22.6553	22.8838	22.9154	22.9796	22.1716	22.827	22.0409	22.184	21.5774	22.4494	22.1722	22.5858	22.403	22.7858	22.9786	22.6827	22.2988	22.0752	22.1868	22.613	22.8192	22.7872
P36536	63	Sar1a	1	22.3059	22.9206	22.2501	23.0622	NA	23.2837	23.1952	22.3631	22.1712	21.8135	22.8349	23.0944	23.7133	23.4671	23.8935	23.3962	22.6325	23.5351	22.7083	21.8665	22.7802	22.445	23.0347	NA	22.7486	21.7162	22.7864	22.7875	22.1557	22.7515	22.0571	NA	NA	22.8727	22.3251	23.105	22.7576	22.4996	22.2203	22.2118	22.8212	NA	23.4863	22.8688	22.9594	23.1707
Q9D1J3	47	Sarnp	1	21.3163	NA	20.7982	NA	NA	NA	NA	NA	20.5996	NA	22.2021	21.6174	21.8482	20.8351	21.4694	21.8093	21.4627	21.2157	21.4065	NA	21.7076	22.0405	21.8251	NA	21.0944	21.3833	21.1553	22.0803	21.9867	20.648	21.4706	NA	NA	21.6898	21.4486	21.136	20.9346	21.3857	21.1943	21.0856	NA	NA	20.8469	21.706	20.7751	20.9115
P26638	222	Sars1	1	23.8696	24.3103	23.7617	23.6444	23.6391	NA	23.087	23.7563	23.5908	23.734	23.9568	23.6374	24.3944	24.0712	NA	25.1371	23.9602	24.1318	23.648	23.7399	23.9948	24.0367	24.204	23.9303	24.1578	23.9535	24.1219	24.302	24.0865	23.9683	24.3239	23.758	23.4264	23.9871	24.3338	24.3366	23.9955	24.2709	24.2431	24.6128	24.4699	23.6637	24.3179	23.6986	24.095	24.0673
O35609	21	Scamp3	1	20.1524	20.1896	20.6505	20.681	NA	NA	21.5114	20.8442	20.4548	20.0573	NA	NA	NA	NA	NA	NA	NA	NA	NA	NA	NA	NA	NA	NA	NA	NA	NA	NA	20.7339	20.6107	20.6261	NA	NA	20.1649	20.5028	20.2974	20.2184	19.8099	20.7089	19.7643	NA	NA	20.242	19.9225	20.3653	20.192
O35114	97	Scarb2	1	23.3184	NA	22.6028	22.6848	NA	NA	22.9676	23.1498	23.4043	23.412	22.7357	23.0466	23.7746	23.7177	23.1266	23.1912	23.8024	23.1393	23.3233	23.0956	22.5672	23.3015	23.4602	NA	22.0729	22.8772	22.668	22.4697	22.1761	22.2382	22.0743	23.0727	NA	22.9946	22.8144	22.4155	22.6012	22.7762	23.2736	23.1791	NA	NA	23.2601	23.6663	22.5929	23.1643
Q8K2B3	71	Sdha	1	21.9915	21.5116	21.2287	21.4803	NA	22.6653	21.635	21.5561	21.5977	21.1181	21.0305	21.2748	22.4177	NA	NA	21.4535	21.359	21.0953	21.188	NA	NA	21.5397	NA	NA	21.8205	21.5529	21.7224	22.0932	20.5628	20.1218	21.0148	NA	NA	22.458	21.587	21.1332	21.1482	21.1954	20.7668	20.0825	NA	NA	21.8781	21.3305	21.4811	21.1374
Q9CQA3	43	Sdhb	1	21.5868	23.0705	21.6809	23.0612	22.5675	NA	22.5798	22.6081	22.2443	21.8272	21.5029	20.359	NA	22.0163	NA	21.8849	21.2792	21.4796	21.7038	NA	21.7096	21.8051	22.2932	NA	22.9972	21.9734	21.6929	21.7152	22.1927	20.3725	22.0755	NA	NA	22.5568	21.1491	21.0115	21.8002	NA	20.6202	NA	NA	NA	21.2425	NA	21.5853	21.4975
Q9R0P6	23	Sec11a	1	20.564	21.1847	21.264	21.6868	21.1989	20.7003	21.5847	20.8311	20.9411	21.3119	NA	NA	NA	NA	NA	NA	NA	NA	NA	22.057	22.1463	22.3113	21.5763	21.2752	21.8501	22.2538	21.552	21.8417	22.2398	21.8761	22.2851	21.3109	20.5304	21.2065	21.5544	21.3169	21.7278	21.6684	21.1805	21.5651	20.889	20.222	21.6995	21.5927	21.4017	21.365
Q9D1M0	61	Sec13	1	22.3261	22.4177	22.9712	22.6258	NA	NA	22.7476	22.2237	22.9009	22.2325	22.6887	23.2063	22.0903	21.8651	22.5425	23.0405	23.576	22.8304	23.3287	22.5388	23.2572	22.9558	21.9513	NA	23.8129	23.186	23.31	23.5148	22.8901	23.6971	24.3785	22.8717	NA	22.5632	23.2507	23.4551	23.0284	22.912	23.5926	23.613	22.7429	22.6702	23.465	23.1755	23.2209	23.2873
O08547	49	Sec22b	1	22.0365	22.2705	22.7873	23.0772	NA	NA	23.338	22.9382	22.1412	23.6308	22.9366	22.7964	22.7471	22.8758	NA	23.1287	22.9454	22.7192	22.9454	22.4909	22.4483	22.7891	23.0312	NA	22.7775	22.5705	22.5249	23.102	22.203	22.1774	22.0425	NA	22.8167	21.7478	21.8593	21.8975	22.2429	23.178	22.3979	22.5889	NA	NA	21.713	22.5228	23.0711	23.1041
Q9D662	50	Sec23b	1	21.8449	22.2967	22.3478	21.9279	NA	NA	22.5508	21.5061	22.2298	22.544	21.6083	21.4818	NA	22.3937	NA	22.4336	NA	21.6021	21.54	21.7799	22.3089	21.9531	20.7836	NA	21.6803	22.6401	21.9495	21.3184	20.761	21.692	NA	NA	NA	NA	21.3707	22.0153	22.2408	21.3707	NA	21.1118	NA	NA	22.1882	21.7407	21.66	21.5533
Q3UPL0	100	Sec31a	1	22.5506	23.3937	23.5446	23.6662	23.0547	NA	23.1947	23.2551	23.0863	23.6192	23.6836	22.3637	22.7962	23.4197	NA	23.2383	22.4023	23.1737	23.4269	21.6006	22.8585	22.5155	22.393	22.2733	22.3679	22.9092	23.3026	23.201	23.1417	22.738	22.6543	NA	NA	22.6231	22.9399	23.4011	23.1226	22.9569	22.8849	22.804	22.509	22.1305	22.9924	22.8985	23.139	23.4992
P61620	108	Sec61a1	1	23.1168	23.3982	23.9735	23.6427	NA	24.6303	23.5567	23.2849	23.345	23.738	24.304	22.8343	23.38	24.5813	NA	23.3978	23.3844	23.7696	24.1063	23.1148	23.2002	23.3984	23.7084	NA	23.13	22.675	23.5192	23.5284	23.7357	23.6986	23.2065	23.8551	NA	23.0751	22.9266	23.3188	23.6541	23.8492	23.305	23.3422	23.6882	23.4803	23.6597	23.3745	23.6177	23.5406
Q9CQS8	62	Sec61b	1	23.6494	23.9294	23.7367	24.228	24.0869	22.7277	24.0777	23.168	23.25	23.8328	24.8617	24.6891	23.7095	24.398	23.0363	23.7374	24.0406	24.2575	24.5044	23.3391	24.2542	23.7681	24.1575	23.1332	23.8153	24.121	24.5633	24.362	24.632	24.1572	23.7272	23.7286	23.4599	24.3477	23.552	24.2018	24.7998	24.9943	24.7226	24.6211	24.2019	23.4415	24.5093	24.2029	24.0825	24.8492
Q8VHE0	33	Sec63	1	21.2288	21.5085	21.1263	21.7802	NA	NA	21.5963	22.1028	21.8431	21.8282	21.4164	21.6268	NA	22.4904	NA	21.2778	21.4771	21.9468	21.5596	21.9679	22.022	22.2782	22.1195	21.7841	22.7892	21.3445	22.1666	21.6119	21.6815	22.0751	22.0945	NA	21.5621	22.9119	21.4827	22.2329	21.864	NA	NA	NA	NA	NA	NA	NA	NA	NA
Q9ERR7	39	Selenof	1	21.3455	20.875	20.7541	NA	NA	NA	NA	NA	21.4862	21.1376	21.3378	20.9426	NA	21.3979	NA	21.947	NA	21.6819	20.8936	NA	20.7504	20.6584	NA	NA	21.2477	22.537	21.093	21.6301	20.8645	20.1128	21.2995	21.8034	21.6057	21.0473	20.7083	20.9801	21.2205	21.506	21.1443	20.5477	NA	NA	21.1401	20.7492	21.1994	21.1514
Q8C1B7	114	Septin11	1	23.4178	23.8319	23.743	23.4453	NA	23.9337	23.8642	23.3684	23.273	23.5939	23.8797	23.5812	23.7363	23.5641	NA	23.6668	24.1267	23.3894	23.9275	22.2445	23.3254	23.4475	22.8176	NA	23.8323	23.2684	23.7254	23.8792	23.5708	23.3977	23.2178	NA	NA	22.7653	23.089	23.5923	23.843	23.8742	23.5174	23.3079	23.1454	23.268	22.7888	23.1111	23.7867	23.902
P42208	141	Septin2	1	23.504	23.6056	23.5932	23.779	NA	NA	23.5204	23.6356	24.0332	23.7276	24.0715	23.9232	24.002	22.8735	23.5294	23.7838	23.7628	23.7917	24.0891	22.8942	23.3378	23.1998	23.4912	22.7192	23.4576	23.5676	24.0344	23.3437	23.6177	23.8366	23.6258	23.8921	23.5593	23.3164	22.8878	23.766	23.5042	23.7748	23.9554	23.3708	23.7924	NA	23.5344	23.0698	24.3377	23.9623
O55131	219	Septin7	1	23.5834	23.5734	24.5728	23.8675	23.6053	NA	23.4277	23.7947	24.1391	24.0274	23.7976	23.5645	23.6532	23.8995	NA	23.0072	23.6957	23.4171	24.0436	23.6928	23.6619	23.6224	24.238	24.0327	23.5626	23.9439	23.9992	24.1048	23.2131	23.5073	23.8665	23.5475	24.0856	23.5133	23.2294	23.3382	23.7849	24.1787	23.8307	23.8247	24.0296	NA	24.1662	23.3898	24.2593	23.8534
Q80UG5	190	Septin9	1	22.836	22.6076	22.7991	23.1098	NA	NA	23.584	23.2667	23.5603	23.596	23.6025	22.681	23.1866	23.3408	23.3388	23.3563	23.6317	23.5871	23.9085	23.3571	23.3064	22.9967	23.9838	23.4699	23.186	22.7082	23.4757	23.3398	23.2183	23.2409	23.1458	24.3646	23.4332	22.84	23.2247	23.5657	22.9861	23.5179	23.3168	22.8327	NA	22.8489	22.8655	22.7577	23.5834	23.6247
Q9CY58	130	Serbp1	1	23.6901	24.3486	24.1877	24.0289	NA	NA	22.6128	24.3153	23.7577	24.2812	23.9073	23.5156	23.8246	24.234	NA	23.0078	22.3361	23.7212	23.7693	23.6418	24.3007	24.3142	24.7589	23.6824	24.2006	24.376	24.992	24.6417	24.5871	24.4373	23.4913	23.8115	22.8599	24.2427	24.0057	24.5849	24.3842	25.3439	25.1541	25.7802	24.5974	24.3376	25.2764	25.6862	25.1102	25.2163
Q60854	54	Serpinb6	1	21.8664	21.0757	21.107	20.597	NA	NA	NA	20.7652	21.0526	21.4889	21.0642	21.1237	NA	NA	NA	21.0357	21.5814	22.1576	21.3367	21.6082	21.0592	20.2498	21.9181	NA	21.0387	21.4745	20.9212	20.6659	21.014	21.0256	20.9596	22.0177	NA	21.9085	21.1518	21.3222	21.7604	20.8051	21.1087	21.4019	NA	22.1831	21.0118	20.8501	21.3544	21.6744
P19324	584	Serpinh1	1	27.3427	27.5811	27.4755	27.8647	27.355	26.6855	27.7896	26.7994	26.8687	27.2559	28.0182	27.2371	26.6768	27.7622	26.8198	26.9689	26.4317	27.5674	26.6004	27.5448	27.0686	26.7537	27.2358	26.1168	26.6257	26.8455	27.5518	26.8422	28.021	27.5737	27.043	27.6388	26.1129	26.4567	26.9319	27.8183	27.9375	27.4171	27.3495	28.0429	27.4998	26.3002	27.6051	26.9366	28.2579	28.2281
Q9EQU5	132	Set	1	25.2747	25.0561	23.7711	24.4576	NA	NA	24.3743	24.4412	26.0969	24.0197	24.0174	24.291	24.6941	24.4685	25.2981	24.2666	23.8556	23.607	24.5832	24.5639	23.565	23.254	24.3833	25.139	23.6623	23.6683	23.3043	24.9865	24.0501	24.0015	23.9549	24.9872	25.3931	23.4083	23.4654	24.391	24.3191	24.4698	24.3355	23.8992	NA	25.3578	24.4238	23.8531	24.5685	24.5573
Q8K4Z5	39	Sf3a1	1	21.1426	21.4127	20.4253	NA	NA	NA	NA	21.2718	20.1201	20.7712	20.9569	20.3252	NA	NA	NA	21.5875	20.7934	NA	21.1661	NA	20.2592	NA	NA	NA	21.2214	20.4646	20.7936	20.7125	20.3112	20.4296	20.5169	NA	NA	21.1479	21.5006	21.0506	20.743	21.1121	20.6166	21.4907	NA	NA	21.1307	21.207	20.8844	20.7913
Q9D554	80	Sf3a3	1	22.0602	22.2344	22.7741	22.3017	23.0414	NA	23.1485	23.1482	23.0028	22.2207	22.625	22.9554	23.6626	22.367	NA	22.2135	23.2838	21.9346	23.4292	22.1578	22.4076	22.3588	23.638	NA	NA	22.7001	22.3835	22.5171	22.7999	22.3726	22.0304	NA	NA	23.2292	23.1202	21.7616	21.9514	21.8972	23.2449	22.0836	23.0253	NA	22.982	22.9822	22.4121	22.1963
Q99NB9	64	Sf3b1	1	21.9603	22.5876	22.4162	22.6496	23.6381	NA	23.2071	23.2669	23.3929	22.5001	21.5007	22.133	NA	NA	NA	22.1251	21.8417	21.6928	21.9027	NA	22.5716	22.1147	NA	NA	22.5425	21.7005	21.4032	22.5213	21.9166	22.7024	21.8403	23.2438	NA	24.2426	21.5963	22.0092	22.3126	21.6518	21.5317	21.7178	21.9049	21.7963	21.8533	22.026	22.173	22.1587
Q3UJB0	74	Sf3b2	1	21.6227	22.6296	22.841	22.5138	NA	NA	22.2019	22.7982	22.4457	22.4229	21.85	21.6554	NA	21.5523	NA	22.0219	21.3678	21.8889	22.0052	22.4798	22.3533	22.0885	22.74	NA	23.3603	22.1147	22.3223	22.5539	22.2951	22.3132	21.6355	21.6694	21.918	22.3774	21.3878	22.4158	21.977	22.3479	22.7236	22.4929	22.1016	NA	22.474	21.8406	22.2552	21.467
Q921M3	67	Sf3b3	1	21.72	21.8149	21.7916	21.2657	NA	NA	21.2565	21.6127	21.4549	21.7613	21.5225	21.7741	NA	21.7634	NA	20.8883	20.83	20.988	20.6958	22.0809	22.213	22.1353	NA	NA	NA	22.5892	21.9367	21.8211	23.2263	22.9622	22.3535	NA	NA	22.9097	21.7166	22.4158	21.7543	21.9231	20.8448	20.6598	NA	NA	NA	20.6209	21.7073	22.0016
Q8VIJ6	171	Sfpq	1	23.9825	25.0526	24.4945	24.4219	NA	NA	24.6562	23.967	25.0495	24.8087	25.015	24.8318	23.3559	24.2044	NA	24.9089	24.6834	24.8165	24.4646	24.3915	24.2276	24.4369	24.3677	24.1166	24.5349	24.543	25.0123	24.8303	24.3195	24.3279	24.1339	23.9825	NA	23.6138	24.0887	24.4986	24.7069	25.1678	24.476	24.5336	24.1553	23.5353	24.5176	24.8	25.2366	24.9836
Q99JR1	48	Sfxn1	1	21.6946	21.3766	20.9001	21.5216	NA	NA	21.9382	22.3255	21.9979	21.7253	21.6905	23.1382	NA	NA	NA	NA	NA	NA	21.6381	22.6271	22.1768	21.9788	22.0619	NA	21.8568	22.3681	22.1374	22.6977	22.0375	22.7377	22.2618	NA	NA	22.9573	21.565	22.1056	22.4265	21.6911	21.7829	21.4313	NA	NA	21.929	22.3609	21.6868	22.2238
Q91V61	71	Sfxn3	1	22.3701	21.375	22.1679	22.948	NA	NA	NA	21.6874	21.8736	22.778	23.0123	22.8348	22.2565	21.425	NA	21.7526	22.0929	23.049	23.0535	23.3235	22.4792	22.8993	22.5165	24.0907	21.7147	23.1611	22.6386	22.4902	22.2299	22.2672	23.5263	NA	23.6868	22.8775	22.7796	NA	21.9957	23.0399	22.9483	22.8703	NA	23.1494	23.0455	22.5854	22.7114	23.238
Q9JJU8	80	Sh3bgrl	1	22.9371	22.7318	22.4867	22.2261	NA	NA	24.0957	22.7563	21.8781	22.4153	22.9368	21.8923	23.0951	22.7905	24.1638	22.2867	22.1584	22.5557	21.8399	21.8374	21.5751	22.6867	23.725	23.3174	22.9596	22.0817	22.8075	22.4076	23.4599	21.8071	22.6212	NA	23.286	22.8857	22.4868	23.2143	22.8575	21.1681	21.6103	21.4229	NA	22.7875	22.1765	21.944	22.377	22.5221
Q91VW3	42	Sh3bgrl3	1	22.3074	19.8717	21.3439	20.6377	21.5937	NA	21.1011	21.1545	21.8903	20.6811	21.584	20.6638	21.3867	NA	21.9073	20.3163	20.7676	20.8683	21.0387	NA	20.2952	19.6471	20.906	NA	19.9314	20.3294	20.9182	20.1365	21.3405	21.0477	20.4808	NA	21.8598	21.3724	21.0211	21.6603	21.4549	20.7716	20.9675	20.5623	22.1283	21.5727	20.8308	20.7666	21.4834	21.5452
Q9CZN7	299	Shmt2	1	24.684	24.9947	24.2394	23.7163	25.5112	NA	24.46	24.0869	23.7696	23.8276	23.9211	23.8763	24.4861	23.9719	24.6885	23.6352	23.6079	23.4966	23.2651	24.4555	23.9439	23.8104	23.7325	NA	24.344	24.1408	23.8615	24.2362	23.4701	23.4661	23.4334	24.3988	23.9689	23.3812	23.5491	23.6811	23.7182	23.4625	24.0753	24.0122	24.0883	24.1932	23.9823	23.9328	23.7728	23.8172
Q9WTX5	70	Skp1	1	22.8277	22.5686	22.5053	NA	NA	NA	22.2078	22.6516	22.0914	23.0863	22.8185	22.5957	24.501	NA	NA	23.7161	23.2555	23.9645	23.954	22.9365	22.642	NA	24.3211	24.0026	22.5732	21.8751	23.0152	22.5944	22.0631	22.6668	22.1	NA	NA	21.8081	22.4161	22.2658	22.5959	22.6942	22.431	23.081	NA	NA	22.5382	22.2775	22.7565	23.1713
Q9CR62	38	Slc25a11	1	21.1948	21.0161	21.1225	21.4259	NA	NA	21.7759	21.3273	21.8464	21.9628	21.6164	21.091	21.6086	21.2095	22.2392	21.7156	21.3829	21.4835	21.4431	22.1532	21.3637	20.9523	21.819	NA	21.7355	21.5057	21.7716	21.9503	21.9103	21.049	21.1711	21.3402	NA	21.1735	21.7813	21.3421	21.0214	NA	NA	NA	NA	NA	NA	NA	NA	NA
Q8BH59	89	Slc25a12	1	22.5368	23.4914	22.6099	22.5845	22.6578	NA	22.7093	22.6627	22.7547	23.7122	23.8179	22.7706	NA	23.279	NA	22.814	22.8887	23.8299	22.8661	23.0847	22.5758	22.4672	23.1784	22.5211	23.2644	23.0069	22.9234	22.7201	23.6016	22.4656	22.6289	23.4828	NA	23.3814	22.4321	23.7764	24.1387	22.2508	22.4499	22.0679	22.8161	NA	22.5368	22.7998	23.476	23.9812
Q8VEM8	223	Slc25a3	1	24.5819	24.5297	23.7403	23.6667	24.237	NA	23.699	23.6997	23.6784	23.7277	23.7485	23.8863	23.4578	23.9246	22.8399	24.0843	24.1638	24.286	23.7624	24.3788	25.0716	24.045	24.3236	24.405	24.1768	23.7754	24.2414	24.03	24.6601	24.7751	24.3767	24.7138	23.8129	24.0156	25.102	24.354	24.6455	24.9287	24.3083	24.6447	24.4822	24.3006	23.9337	24.7447	24.3784	24.4024
P48962	436	Slc25a4	1	25.8235	25.8577	25.9556	26.0987	26.0869	25.5783	26.3285	25.3383	25.4992	26.3105	25.7543	25.7226	24.8811	25.2656	24.8258	25.4829	25.7127	26.1117	25.3574	26.0203	25.579	25.4023	25.3935	24.7884	25.5752	25.3295	25.7917	25.4328	26.078	25.8618	25.5089	25.967	24.8901	24.865	25.5861	25.6107	25.9856	25.699	25.8149	25.694	25.8262	25.0353	25.9284	26.171	25.8222	26.4267
P51881	153	Slc25a5	1	24.7461	24.603	24.0868	24.3516	NA	24.2128	24.5035	24.0189	23.91	24.9984	24.4054	23.4051	23.9397	24.3493	23.6356	24.5289	25.0352	24.8026	23.2571	25.0587	24.3242	23.5827	23.7971	NA	24.8181	24.1865	25.1451	24.4427	24.6537	24.0402	23.5463	24.8146	NA	23.2083	24.0821	24.1981	24.6121	24.3783	24.3377	24.4383	24.9653	NA	25.1404	25.391	24.7658	25.0247
P10852	191	Slc3a2	1	23.3823	23.4417	22.8953	22.9445	23.5956	23.4785	23.3903	22.9971	22.2256	22.5774	23.722	23.2924	22.7551	23.6615	23.9379	23.2076	22.9275	23.2307	22.2648	23.3826	22.7331	22.789	23.7513	22.5685	23.2416	22.9826	23.201	23.2976	23.3412	23.0761	22.8244	23.71	23.4355	22.8153	22.756	22.8784	23.5863	23.2475	23.0717	23.2768	23.226	23.4898	22.7461	22.6695	23.264	22.6502
Q91ZW3	46	Smarca5	1	21.2225	21.8873	22.0408	22.0814	23.2458	22.4456	21.921	22.1629	22.2288	21.8293	21.836	21.8905	21.8228	NA	NA	21.1145	21.1821	21.3413	22.1262	21.5299	NA	NA	NA	NA	NA	22.1815	21.5425	21.3454	22.2691	22.7322	22.4182	22.245	21.5757	22.6591	22.2783	22.0887	21.5541	21.9607	21.3238	22.3218	NA	NA	21.7651	NA	21.654	21.5801
Q9CW03	58	Smc3	1	21.4614	22.1341	22.1466	21.826	NA	NA	21.9328	21.8055	23.0736	21.009	21.8129	21.9145	NA	23.1311	22.6577	22.6423	22.3235	21.7869	21.4775	21.6141	22.5354	22.4597	22.2961	NA	21.5793	22.8668	22.3674	22.6871	21.6372	21.8349	21.3297	22.3943	NA	21.5958	22.5782	21.2856	21.5136	22.4679	22.0543	22.4654	21.741	NA	21.5911	22.0634	22.0001	21.9934
Q3UKJ7	26	Smu1	1	20.5935	21.0914	21.7143	21.3857	NA	NA	21.2908	20.9675	21.3825	20.9828	21.0113	21.0603	NA	NA	NA	21.0908	21.3262	20.8355	20.9802	21.5182	NA	NA	NA	NA	21.5389	21.5745	20.8133	21.102	20.2219	22.4315	21.9346	NA	NA	20.7169	21.3837	21.4677	20.2748	21.0929	21.421	21.2667	NA	NA	22.0073	21.4976	21.7578	21.4638
Q78PY7	183	Snd1	1	23.0765	22.7053	23.1704	22.9089	NA	NA	23.6304	22.6404	23.1706	22.6756	23.1894	23.1954	22.8675	23.703	NA	22.7411	22.6986	22.8643	23.2308	23.4839	22.862	22.9724	23.353	NA	23.0495	22.9107	22.9777	23.6899	23.003	23.2958	23.2234	23.6561	24.4479	23.3401	22.3875	23.4056	22.8379	22.7375	22.8567	22.8673	NA	NA	22.0216	22.7129	23.1274	22.9624
Q6P4T2	133	Snrnp200	1	22.207	22.8798	22.6788	22.9163	NA	NA	22.9178	22.5628	22.423	22.5991	22.2954	22.7384	22.6088	22.7278	22.1761	22.6131	22.9086	22.0744	22.5553	22.7829	22.9234	23.2374	NA	24.1582	22.6839	22.3331	22.8529	22.5273	22.3498	22.5647	22.3073	22.7118	NA	22.2633	22.6579	22.1367	21.9199	22.3847	22.9821	22.295	22.9185	NA	23.0875	23.1706	22.8758	22.7776
Q62376	40	Snrnp70	1	21.6289	20.5231	20.9354	21.202	NA	NA	21.084	20.393	21.946	20.969	22.018	22.631	NA	22.1233	NA	22.0799	22.5836	22.1768	21.7478	22.5128	22.4257	22.2072	NA	NA	21.9657	22.4008	21.9856	22.17	22.6467	22.4781	22.2483	21.9718	NA	22.4913	22.4964	22.5745	21.4795	22.179	22.2599	22.4427	22.5039	NA	22.5078	22.213	22.5562	21.915
Q62189	72	Snrpa	1	22.7394	22.6239	22.52	22.3107	NA	NA	21.948	22.6336	22.4448	22.11	22.4557	22.3404	22.2348	NA	NA	21.5846	22.6494	22.2658	22.6313	23.3528	21.6689	22.0744	22.6457	NA	22.3147	21.9747	22.1223	21.6998	22.2577	22.8566	21.8529	NA	NA	22.8266	22.3664	22.695	22.4438	22.235	22.5087	22.4092	NA	NA	21.7458	22.6785	22.5795	22.2306
P62315	33	Snrpd1	1	21.6139	22.6074	22.6128	21.3986	NA	NA	NA	21.1769	20.7299	21.15	21.2892	20.6731	21.7653	21.3757	NA	NA	NA	20.2548	NA	21.24	21.1603	20.8545	NA	NA	21.406	20.9713	21.1725	21.0192	21.33	20.9141	20.4744	NA	NA	NA	20.7387	20.9357	20.316	NA	21.2371	21.2977	NA	NA	NA	21.5542	19.8624	NA
Q9D0T1	53	Snu13	1	24.4993	25.1007	25.1253	24.8721	NA	NA	26.0563	26.0635	25.3249	25.5867	24.6448	25.0145	NA	25.8963	26.3619	26.0844	25.9487	24.6988	25.401	25.2797	24.9775	25.2241	25.9469	26.2423	26.4816	25.4185	25.3083	25.1547	25.2211	25.4912	24.7456	25.7676	25.8826	25.4995	26.2156	25.1576	25.1946	26.1864	25.7209	24.741	26.0013	25.9766	26.2399	25.8656	24.6196	25.0717
Q9CWK8	33	Snx2	1	21.004	20.6125	21.6981	21.5709	21.7558	NA	NA	22.1864	21.4589	21.8332	21.5523	20.972	NA	21.6805	NA	NA	20.83	22.1688	21.6799	20.5997	21.5795	21.1268	20.6603	NA	21.6041	21.0367	21.2595	21.3939	21.4772	20.9445	21.4458	NA	21.2936	20.8795	21.2445	21.4997	20.734	NA	20.7715	NA	NA	NA	NA	20.7544	20.5961	20.6128
O70492	38	Snx3	1	21.327	22.3011	22.2604	21.9153	NA	NA	21.2665	21.5211	22.0377	22.2689	22.3935	23.1629	21.8073	22.1184	21.1065	22.4329	21.5645	21.8071	22.1028	21.3267	22.5715	22.1506	21.5918	NA	22.1542	22.1222	22.2211	22.2038	22.4868	22.209	21.9267	21.512	NA	22.164	22.3555	22.4145	22.2754	20.8025	22.1005	22.2534	NA	NA	22.7153	22.6206	22.9921	23.4375
P08228	127	Sod1	1	24.5248	24.0486	23.0163	23.4875	NA	NA	23.7995	23.0711	23.0619	23.967	23.2584	22.6145	24.9958	23.8456	24.9006	24.9177	23.1203	22.7207	23.34	23.5566	22.8804	23.405	23.7756	24.8368	23.6766	23.104	23.0895	22.9985	22.9687	23.6859	23.9208	NA	NA	23.9583	23.2417	22.8215	22.5624	22.7363	22.4111	22.0765	NA	24.2208	22.8132	22.9139	22.2585	22.6119
P07214	109	Sparc	1	23.4055	22.3695	22.8449	22.6349	NA	NA	22.7932	22.1876	21.9233	22.0851	22.8806	22.1526	23.5029	22.8464	23.9545	23.8668	22.9189	23.0246	22.077	23.2433	21.9811	22.6919	23.0846	23.8211	22.5446	22.2295	21.9388	22.156	22.2207	23.336	22.2749	23.3939	NA	22.042	21.9733	22.1994	21.9534	23.1217	22.5606	23.3448	23.4433	23.2089	23.2789	22.8123	22.8808	22.4392
P16546	837	Sptan1	1	23.7215	23.7357	23.82	23.5836	24.2044	NA	23.6599	23.4805	23.6684	23.5604	23.6374	24.0345	23.7617	23.7315	23.1577	23.5203	23.7121	23.9431	23.2625	23.4273	23.6888	23.4169	23.5018	24.2861	23.3268	23.8936	23.548	23.4404	23.8522	24.0002	23.8562	24.0897	23.9769	23.5362	23.6701	23.7809	23.545	23.4784	23.3978	23.656	24.0009	23.694	23.298	23.6875	23.6896	23.7799
Q62261	498	Sptbn1	1	23.2421	23.6512	23.864	23.3961	24.3479	24.0848	23.7224	23.5432	23.7108	23.4301	23.6836	23.7437	23.0049	23.0865	22.8031	23.1921	23.6527	23.8688	23.3064	23.196	23.4436	23.2352	23.6518	23.3845	23.366	23.7154	23.3818	23.557	23.8322	24.0368	23.7213	23.2053	22.7882	23.5059	23.4975	23.5909	23.6955	23.4547	23.7199	23.6793	22.7182	23.4539	23.4455	23.4622	23.595	23.6479
Q64674	60	Srm	1	22.1496	21.1402	21.0174	21.0916	NA	22.5797	21.7344	21.9426	21.404	21.0528	20.9514	19.9151	21.5508	NA	NA	21.6353	19.858	21.0093	20.8677	NA	21.6706	20.8362	NA	NA	22.5457	22.0203	21.3489	21.5943	20.3266	20.398	20.712	NA	22.9962	21.9523	20.2263	21.3064	21.2203	21.6382	21.495	21.5321	NA	NA	21.2158	20.5833	20.0852	21.7277
P47758	43	Srprb	1	21.5904	22.0834	22.1113	21.7764	22.7458	NA	21.8776	22.647	21.6865	22.0578	22.2935	21.2412	NA	22.214	NA	22.326	22.0153	22.3257	22.6012	21.8481	21.9428	22.0524	21.8193	NA	22.2394	22.1354	22.5516	21.8957	21.4014	21.8733	21.9597	NA	NA	22.5257	22.6071	22.12	22.022	21.5695	21.7299	22.1911	NA	NA	22.3772	23.0471	21.9401	21.3751
Q99MR6	46	Srrt	1	20.8295	NA	21.601	22.242	NA	NA	22.1569	21.5587	21.1075	21.7496	20.7779	21.1269	NA	NA	NA	NA	22.2056	NA	21.1487	21.027	21.3549	21.5163	21.2767	NA	21.6667	21.1811	21.8126	20.7948	21.8102	21.5911	21.6824	21.6311	NA	21.4038	21.5946	21.9443	22.0329	21.5935	21.9353	21.2987	NA	NA	21.9024	21.3569	20.9974	21.2101
Q6PDM2	179	Srsf1	1	23.9164	24.3018	25.0508	24.2283	23.588	NA	23.7842	24.2613	24.339	24.2505	24.4714	24.3102	23.6929	23.7211	23.9001	24.1758	23.9822	23.944	24.5373	24.6028	24.0434	23.7101	24.0693	23.4177	24.2387	24.233	24.2726	24.8093	24.4051	24.2795	23.8576	23.9774	24.4195	24.1492	24.3001	24.3817	24.523	24.6939	24.4937	24.227	24.0359	24.2339	23.8468	24.3446	24.9327	23.9527
Q9R0U0	48	Srsf10	1	21.7374	22.6756	23.4812	22.8776	22.1759	NA	22.4943	22.7326	22.7637	22.586	21.58	22.9847	21.2303	22.0144	21.2203	22.382	22.2711	22.5285	21.5689	21.9691	22.5678	22.0029	21.6991	NA	22.5932	22.3753	22.6104	22.5144	NA	NA	NA	NA	NA	NA	NA	NA	NA	22.2412	22.316	22.5722	21.8893	21.1504	22.4241	22.3177	22.5097	22.2181
Q62093	63	Srsf2	1	23.681	23.983	24.8416	24.2311	NA	NA	23.2302	24.0255	24.1613	24.2097	24.3404	24.8056	23.2621	23.8034	NA	24.2838	24.296	24.3721	24.8389	24.2242	24.2975	23.6758	23.8109	NA	23.3625	23.7639	24.2131	24.59	24.4382	24.6527	24.505	23.9397	NA	23.7498	24.5439	24.6093	24.4667	25.1665	25.2221	24.5843	23.6814	22.9634	24.3944	24.9579	25.1912	25.0814
P84104	93	Srsf3	1	25.8874	26.8439	27.0749	26.4697	26.0254	NA	26.0664	26.5088	26.4028	26.7876	26.5921	26.2808	NA	26.0757	NA	25.9778	26.2707	26.614	26.6308	26.0624	26.576	25.9131	26.3575	25.2516	26.2236	26.1616	26.6543	26.8992	26.3298	26.8159	26.2906	26.3066	25.9157	26.5033	26.5825	26.9563	26.4245	26.2116	26.3477	26.6761	26.4644	25.9332	26.6335	26.5615	26.7658	26.2479
O35326	36	Srsf5	1	21.3849	21.9841	22.2775	21.6784	NA	NA	21.593	21.5743	21.6003	22.2442	22.0132	22.1844	NA	21.4701	NA	21.9386	21.9247	21.6035	21.9875	22.5538	21.2014	21.3713	22.0457	NA	21.9013	21.4108	22.0006	21.8627	21.6039	22.3164	NA	NA	NA	NA	21.3345	21.8196	21.416	22.8167	22.1194	22.8189	NA	NA	22.5782	23.0875	22.6874	22.1471
Q3TWW8	49	Srsf6	1	22.3561	21.9322	22.3925	21.421	NA	NA	21.5539	21.4174	21.8035	21.8757	22.4326	22.9176	NA	23.5414	NA	22.4969	21.6874	23.1715	22.5797	23.5824	22.6269	23.6829	23.2922	NA	23.4671	22.5628	23.0722	23.7467	23.0368	22.9608	22.8754	NA	NA	22.3668	23.327	23.4624	23.7675	NA	NA	NA	NA	NA	NA	NA	NA	NA
Q8BL97	61	Srsf7	1	23.1094	23.8104	24.7398	23.6498	23.3093	23.1072	24.125	23.5081	24.1262	24.0109	23.5596	24.3718	23.3749	23.9492	23.4817	24.9571	23.9783	24.3062	24.0192	24.2666	24.1687	23.5119	23.7526	22.8362	23.814	24.1279	24.1217	24.6022	23.4422	23.5191	23.0109	23.7819	22.8579	24.0685	23.7143	24.1494	23.8965	24.2991	24.2667	24.0772	23.9763	22.4531	23.7717	23.9649	24.294	24.0032
P32067	156	Ssb	1	22.9241	23.2554	23.3263	23.0776	NA	NA	23.4074	22.9561	23.4056	23.4641	23.4659	23.4393	23.3653	23.2782	NA	23.3717	22.9206	22.834	23.2012	23.672	22.9021	23.4407	23.5851	23.3563	23.528	22.9969	23.4666	23.4295	22.9531	23.2199	23.0359	23.4777	23.4582	23.6736	23.1953	23.3312	23.0892	23.1851	23.0916	22.871	24.0658	23.5347	23.1656	22.4063	22.9754	22.7659
Q9CY50	76	Ssr1	1	23.5585	24.1161	23.3709	23.7662	NA	NA	24.283	23.4025	23.6992	23.8075	24.5131	23.1692	NA	23.6395	NA	23.4055	22.7911	24.701	23.9362	23.7797	22.6749	22.8074	23.2794	23.0988	23.8189	23.0288	24.169	23.7538	23.4858	22.8205	22.8384	23.9436	NA	23.3278	23.0201	23.9129	23.9937	23.016	22.7783	22.776	23.6513	NA	23.5009	22.8819	23.6156	24.1789
Q62186	34	Ssr4	1	22.7422	22.8651	22.1137	21.7265	NA	NA	22.8466	22.8845	22.225	23.1076	23.5084	22.2466	23.804	22.6194	NA	22.3657	23.077	23.7956	21.953	23.5462	21.5728	21.9007	22.8232	NA	22.3403	22.033	23.3482	22.8319	23.6596	20.686	22.8511	23.3163	NA	22.6418	22.807	23.3808	23.6631	23.3361	22.478	22.6014	23.0892	NA	22.5942	22.6495	23.2263	23.3904
Q08943	87	Ssrp1	1	22.0326	22.9814	22.9571	23.0467	NA	NA	23.1693	23.24	22.6648	22.8809	21.8446	22.863	NA	NA	NA	22.8468	22.9652	21.5994	22.5765	22.6062	23.0769	22.7613	22.9825	NA	23.0188	23.0018	22.3974	22.8797	21.6484	22.3384	21.1179	NA	NA	22.4024	22.5472	21.5828	21.6119	22.1429	22.7076	22.5932	NA	22.8481	22.2145	22.8314	22.2457	22.4079
Q99L47	145	St13	1	24.839	24.6516	24.5912	25.2933	24.8923	NA	24.141	24.9583	25.1496	24.8225	24.7926	25.2472	24.6951	24.5701	24.5058	25.0457	25.0464	24.8957	24.5109	24.0467	24.7119	24.8887	23.6571	NA	24.2552	24.828	23.7903	24.3173	23.9546	24.7623	24.3899	24.5393	NA	24.5145	24.6063	24.1242	24.5279	24.3843	24.0502	24.4441	NA	24.7738	24.5683	24.7319	23.7598	23.5846
P42225	276	Stat1	1	24.909	24.4717	24.1533	24.5758	NA	NA	24.4354	24.4166	23.7053	23.4513	23.4774	24.979	24.2298	26.7559	NA	24.3208	23.7027	23.3122	23.3568	24.8529	24.9412	24.9994	24.1195	NA	24.9175	24.2224	24.3283	23.2765	23.33	24.7774	24.4608	24.4632	25.4055	24.556	25.4079	24.1653	23.6478	24.3381	25.1904	24.9036	NA	24.8296	24.4186	24.9442	23.5505	23.8559
Q60864	461	Stip1	1	25.0547	24.445	25.3087	24.8065	24.5646	24.6294	23.9246	24.7073	24.7066	24.7233	25.182	25.5128	24.6945	24.7372	24.8245	24.7489	25.1977	25.0078	25.0232	24.1761	25.5433	25.4625	24.7801	24.2883	25.3613	25.4247	24.9312	25.0587	24.6984	25.1852	24.9715	24.4481	24.3261	24.6344	25.0987	25.1333	24.4884	25.0558	25.2167	25.1751	24.4917	24.7545	24.8789	24.5124	24.9495	25.0534
P54227	123	Stmn1	1	24.6378	25.2222	25.7929	24.886	25.4274	NA	24.1345	24.6717	25.4943	25.0306	24.6058	25.2961	24.6096	23.8412	23.6692	24.5573	25.0094	24.9423	24.229	23.8962	25.883	23.9522	24.1566	NA	24.7329	24.7466	24.8162	24.5086	24.0959	24.7285	24.8455	24.2211	24.1305	24.7015	25.2044	24.8347	24.4256	25.2086	24.9356	24.655	NA	23.5985	24.5753	24.1715	24.8631	25.1027
Q99JB2	43	Stoml2	1	21.0818	21.6235	22.016	21.7231	NA	NA	22.4741	21.4521	21.5754	21.6531	21.6202	NA	NA	NA	NA	22.7928	NA	NA	22.1193	22.0845	21.6019	22.6752	22.1734	22.1779	22.3255	21.7805	22.1936	21.9122	21.1978	22.162	22.1679	NA	22.2369	22.034	22.2302	20.7269	21.8656	21.5003	21.8712	21.9223	NA	21.6721	22.1514	21.4099	21.5168	21.6716
Q9Z1Z2	70	Strap	1	21.9827	21.9611	22.2292	21.3712	NA	NA	20.8581	21.9499	21.098	22.013	22.161	20.9012	NA	21.6409	21.4168	22.4418	22.944	22.0578	21.289	22.8164	21.9831	22.1326	22.4755	NA	21.9694	22.8503	22.3657	22.146	22.0113	21.1432	21.959	NA	NA	22.495	21.4837	22.0865	21.9312	21.3425	21.8096	21.4452	22.4975	22.7176	21.7164	22.0613	21.8969	21.826
P46978	144	Stt3a	1	23.394	23.5398	22.2819	23.0052	23.1947	NA	23.6316	22.531	23.1094	23.7014	23.2061	23.2663	24.1651	23.6058	23.5834	23.5706	23.4095	22.7898	23.0644	23.942	23.5335	22.984	24.0524	22.9231	23.4577	23.5319	23.5588	23.3142	23.2284	23.0413	22.6479	23.5598	22.4975	23.1585	23.086	23.4991	23.7947	24.3282	23.0533	23.0828	24.0188	23.2881	23.4915	23.0747	23.3941	23.6075
P11031	40	Sub1	1	23.122	22.5994	22.9529	22.6789	NA	NA	NA	22.3767	22.9812	23.0169	22.4173	22.674	NA	22.1649	NA	22.256	21.9425	22.1492	22.2379	NA	22.6163	22.2585	21.8526	NA	22.7297	23.0844	22.1938	23.1759	22.2873	22.6853	23.049	NA	NA	22.9413	23.747	22.9316	22.3446	23.4235	23.3824	22.6953	22.0337	22.6925	22.7797	22.9881	23.2866	22.7509
Q9Z2I9	35	Sucla2	1	21.578	22.3088	21.7049	22.5424	NA	NA	NA	22.5968	21.3233	NA	22.0931	22.3463	NA	NA	NA	22.4039	22.0383	22.4537	22.0219	22.2854	21.6646	21.8248	21.666	NA	21.5673	21.5964	21.543	21.0879	22.0767	22.0256	21.9092	22.5839	NA	NA	21.5969	22.0552	22.4473	21.2726	21.0899	21.3902	21.9121	NA	21.2196	21.1325	22.268	21.2835
Q9Z2I8	51	Suclg2	1	21.4181	21.0282	21.1331	21.6379	NA	NA	21.8208	21.0261	21.1383	21.7332	21.4163	21.6252	NA	NA	NA	20.6067	20.8203	21.4792	21.3497	21.5954	21.3927	NA	21.1245	NA	20.8966	20.9241	20.799	21.9694	21.9122	21.9823	22.4969	NA	NA	NA	22.1948	22.2459	22.4031	22.1595	21.5596	20.9671	22.0104	NA	20.9058	21.2792	21.5284	22.0681
P61957	41	Sumo2	1	23.8781	23.3641	23.6585	22.5127	NA	NA	22.713	22.6329	23.4325	22.9587	22.7163	22.4396	22.9195	NA	NA	22.0427	21.7759	22.8839	22.4639	NA	22.575	22.5858	22.8019	NA	NA	21.5293	22.2791	23.2182	23.3654	22.8899	21.9324	23.1277	NA	22.7148	23.3487	23.5906	23.2959	22.9785	22.9448	22.1287	22.6744	NA	22.2243	23.1257	23.1412	23.2766
Q8BJS4	94	Sun2	1	22.6705	22.5013	22.8966	23.1494	NA	NA	22.8958	22.6251	22.6929	22.1725	22.6682	23.213	23.8521	22.6717	NA	23.467	23.3341	23.1412	23.0369	22.7931	21.9754	22.4797	NA	22.8195	22.7568	22.5573	22.6132	22.3067	22.7968	22.6553	22.6151	23.6051	NA	22.8518	22.0713	22.5104	22.8939	22.6478	22.4662	22.6277	24.3868	23.252	22.3816	22.8103	22.3438	22.8265
Q64310	54	Surf4	1	22.2001	23.0537	22.3117	23.0438	NA	NA	23.2539	23.1471	22.2286	22.0521	22.9613	22.8882	22.9595	22.6358	NA	23.3743	23.2829	22.8436	23.1916	23.3706	21.5694	23.0318	22.6086	NA	24.0078	22.0504	22.7748	22.7888	22.7727	22.7889	23.5419	NA	NA	22.6941	22.9575	22.4994	22.3012	23.0696	22.0154	22.3152	22.746	NA	22.4689	22.9789	22.7026	22.4982
Q7TMK9	153	Syncrip	1	23.345	23.1296	23.1274	22.8246	22.8574	NA	23.1041	22.8499	23.043	23.1861	22.8938	22.96	24.525	23.2962	NA	23.1761	23.3118	23.3791	23.6449	22.6752	22.9572	22.122	23.7683	NA	22.561	22.7383	22.5016	22.9422	23.102	23.1448	22.3487	NA	23.8918	22.8179	22.9387	22.9547	22.8474	23.1453	23.3029	23.239	23.6415	24.0845	22.84	23.7194	23.3347	22.8087
Q9WVA4	294	Tagln2	1	25.5312	25.2192	25.1554	25.0869	24.6526	NA	24.7308	24.8003	25.3448	25.5213	26.0146	25.9972	24.8229	25.3122	NA	25.2103	24.9826	25.4394	25.4625	24.8442	25.2019	25.1908	25.4325	25.6755	25.1675	25.0046	25.1073	24.9969	25.9988	25.8932	26.0023	24.549	24.519	25.5599	26.1071	25.903	25.7537	25.3774	25.4164	25.5867	NA	25.1267	25.1213	24.9136	25.3554	25.635
Q93092	141	Taldo1	1	23.2665	22.337	22.7618	22.4488	23.4246	NA	23.7649	22.2453	22.4501	22.4626	22.4214	22.1993	23.7932	22.9963	NA	22.7238	22.5858	22.1285	21.9977	23.8469	22.4306	23.181	22.2617	22.5594	22.9113	22.6031	21.6266	21.7617	22.5058	23.0508	23.0479	23.261	NA	23.0562	22.3729	22.6003	22.74	22.7699	23.1993	22.6606	NA	22.9744	22.8112	22.9042	22.5783	22.6616
Q9R233	89	Tapbp	1	22.7956	23.4096	22.8188	23.2822	NA	NA	23.6585	21.8882	23.113	23.207	22.0251	22.804	23.7351	22.8237	NA	24.2424	23.8137	23.0369	22.9434	NA	21.8449	22.1996	NA	NA	NA	22.3753	22.1909	21.3903	21.7709	22.4608	23.2958	23.2294	NA	23.0122	23.2043	22.0021	22.0561	22.8458	23.3134	23.3995	23.7604	23.2822	23.0506	23.4665	22.3156	22.5031
Q921F2	101	Tardbp	1	23.3651	23.1994	23.2852	23.3422	NA	NA	23.1983	23.0737	23.0524	22.8143	23.0935	23.171	NA	23.61	23.9127	23.3982	23.474	22.9152	23.329	22.9248	22.6252	22.6912	22.8771	23.0563	22.8301	23.0324	22.7342	23.1031	22.9882	22.7508	23.1853	NA	23.2067	22.9601	23.2576	22.5789	22.4473	21.9483	23.0224	22.9531	23.1056	NA	22.5457	22.8439	22.9012	22.5347
Q9D0R2	248	Tars1	1	23.6803	23.2755	23.2124	23.5398	23.3264	NA	23.3935	23.4101	23.1249	23.5685	24.5128	23.5846	23.8008	24.1148	23.7555	23.302	23.6015	23.9239	23.4584	22.9356	23.5149	23.4553	23.4079	23.6836	23.4329	23.4909	23.5568	23.6341	23.9265	23.1091	23.4277	23.3155	23.6582	23.5253	23.5884	23.7991	24.4448	23.3044	23.0181	23.0816	25.5134	NA	22.7558	23.1474	23.6683	23.3837
P48428	78	Tbca	1	22.8084	21.7805	22.3862	21.9074	NA	22.4285	22.272	21.9886	22.1175	22.4282	22.8121	22.9805	NA	22.3375	22.5938	22.794	22.7713	22.2519	22.8085	NA	23.1565	22.4573	22.1326	NA	22.4503	21.93	22.3242	21.9988	21.9846	22.3889	23.1857	21.8253	21.5099	22.5851	22.5609	22.3085	23.0506	23.359	23.2146	22.8212	NA	NA	22.9611	22.4731	22.3811	22.8606
P11983	328	Tcp1	1	24.6169	24.0911	24.2139	23.9974	23.4467	24.9573	23.9044	23.8495	24.0893	24.2256	24.0318	23.9018	24.5794	24.3814	24.3149	24.0939	24.3816	23.9071	24.317	24.129	23.796	23.9002	24.0439	24.374	23.4659	24.1824	23.9259	24.0866	24.1855	24.4881	23.6364	24.5074	24.7376	23.7829	24.0911	24.5119	24.1402	24.1091	23.8992	23.9374	24.5008	24.7764	23.9664	24.0996	23.9503	23.9688
P21981	121	Tgm2	1	23.0045	23.1141	22.5242	22.0249	23.1311	NA	23.0716	22.0287	22.7058	23.3907	25.0302	23.6383	23.1247	23.2939	NA	22.6028	23.0262	24.0534	23.3768	22.5928	22.5991	22.2402	23.6575	22.742	22.3757	22.4874	24.0894	22.4801	24.2807	23.0561	23.0418	23.5273	23.2648	23.8226	23.1382	24.9162	24.5433	22.8757	23.3086	23.7031	NA	22.4694	22.5394	23.0623	24.2906	24.1095
Q9D880	58	Timm50	1	21.5462	23.491	NA	24.3865	NA	NA	23.3581	23.9422	22.8654	23.2197	21.4992	22.2076	NA	23.0616	NA	NA	21.4985	NA	22.7537	22.3967	22.7842	23.3278	22.0779	NA	22.7599	21.9448	21.8296	21.206	21.9338	22.0047	22.9747	22.8628	22.7684	22.5759	22.3714	21.6999	21.3376	22.2202	21.7636	22.6744	NA	NA	22.1858	21.9046	21.9587	21.969
P40142	220	Tkt	1	23.704	22.9963	23.0104	23.282	NA	NA	23.2012	23.2613	22.9853	23.1614	21.9182	22.3136	23.1594	22.0133	NA	22.4213	20.9391	22.298	22.7729	23.6452	23.3178	23.6863	23.4285	23.3717	23.6353	23.154	22.6584	22.9601	23.1303	22.2076	23.2322	22.9647	24.1912	22.5345	23.1073	22.5697	22.7682	22.8975	22.9076	22.3136	NA	NA	24.1141	22.1658	22.3943	22.753
P26039	981	Tln1	1	24.0912	24.7649	24.3001	24.2299	24.2979	23.6573	23.8583	24.4325	24.8075	24.7405	25.0007	24.7127	24.2032	24.4736	23.1855	24.3845	24.3507	25.0191	24.6409	23.5847	24.22	24.1675	24.9767	24.0446	24.3976	24.3026	24.9308	24.4881	24.8994	24.7962	24.2638	24.0819	24.3555	24.2455	24.49	24.9281	24.8588	24.9766	24.2825	24.6377	24.5939	23.9808	23.9623	24.1652	25.1274	24.8559
Q69ZZ6	21	Tmcc1	0.9997	22.2279	20.1645	20.8514	19.8771	NA	NA	20.1748	20.2977	21.091	20.4555	22.8424	22.9136	23.1793	NA	NA	22.8789	22.9172	23.0105	NA	20.3677	19.7435	19.4731	20.6294	NA	20.3377	19.8991	21.3749	19.9367	20.6941	19.9604	19.8273	NA	NA	20.2541	19.9756	21.3248	20.2657	20.5981	20.955	20.1989	NA	NA	20.5059	20.9137	21.9595	21.8477
Q9D1D4	76	Tmed10	1	22.8641	21.8676	22.2587	21.7437	NA	NA	23.0028	22.1834	22.4779	22.4205	21.9081	21.8233	NA	22.5734	NA	21.7141	22.6288	22.0088	22.6803	22.922	21.334	21.9765	NA	NA	22.265	22.311	21.9496	22.2483	22.2158	21.8416	22.2479	NA	NA	21.8084	22.1063	21.9031	22.255	22.4182	22.7907	22.8038	23.093	NA	22.3205	22.8823	22.6386	22.3136
Q9R0Q3	94	Tmed2	1	22.7901	22.5863	22.937	21.805	NA	23.8335	22.5809	21.5424	21.5962	22.3828	22.0281	21.5267	23.3049	21.7874	23.9724	21.5205	22.2185	21.573	21.6544	22.5259	23.7777	22.445	22.7163	24.0154	22.3645	22.6308	22.2695	22.0172	23.1077	22.4418	21.7193	22.6409	NA	22.1012	22.1883	22.1446	22.2772	21.9586	22.1083	21.8204	22.8414	22.5789	22.8843	22.5273	22.1396	22.4346
Q99KF1	93	Tmed9	1	23.3161	22.6181	23.2562	22.7317	NA	NA	23.0787	23.272	22.5241	23.1676	22.8579	22.0666	22.8123	NA	NA	22.5759	23.0042	22.7762	23.0181	23.5694	23.3559	23.0625	23.1205	23.2005	23.1179	23.4003	23.6152	22.3871	23.368	24.5361	24.1318	23.8676	23.8362	23.4184	24.1405	23.354	22.885	23.1146	23.7324	23.7247	23.7056	23.4236	23.2595	23.5782	23.6127	23.5291
Q3UBX0	29	Tmem109	1	20.9388	20.5407	20.7339	20.5179	NA	NA	20.8641	20.6153	20.648	20.7259	20.9226	20.9653	20.7547	21.1535	20.4187	21.386	20.7166	21.0035	21.8296	21.3025	20.5874	20.9586	NA	NA	NA	19.9813	19.8993	20.7432	20.8802	21.118	20.7799	20.3703	NA	20.4818	20.4206	20.8977	21.0701	21.6014	21.5473	21.2415	20.8585	20.6986	21.5066	22.9447	21.1408	21.9481
Q9DBS1	75	Tmem43	1	22.4515	22.8085	22.0696	22.6611	NA	NA	22.8764	21.9137	21.8703	22.8386	23.6152	23.0176	NA	NA	NA	NA	NA	23.6643	23.9233	22.72	22.7586	22.4963	NA	NA	22.4751	22.5112	22.5874	23.1019	23.0452	23.6663	NA	NA	NA	NA	23.5212	22.9213	23.3369	22.9342	22.219	22.0681	NA	NA	22.2122	22.7127	22.8543	22.8553
Q61029	231	Tmpo	1	24.213	24.784	25.0845	24.2331	23.3702	NA	24.2958	24.5438	24.2909	24.5501	24.2133	25.0132	24.7132	24.1625	24.6482	24.4487	24.9765	24.4788	24.1221	24.2315	24.6943	24.0425	24.4798	24.6023	24.1362	24.4187	24.5122	24.2599	24.05	24.3284	23.7379	24.1135	24.7163	24.1412	24.1958	23.991	23.918	23.9995	24.5169	24.2088	23.7398	23.8475	23.9754	24.3299	24.2328	24.1379
Q6ZWY8	70	Tmsb10	1	26.8519	24.264	24.4023	24.1841	24.3127	NA	23.3401	24.3349	25.1641	24.6704	24.0066	24.275	24.1967	23.3977	NA	23.0899	23.2521	24.0844	23.0819	25.2789	24.3803	23.9526	22.6821	NA	23.7433	24.0332	24.3787	24.3671	23.5114	24.2	22.5834	NA	NA	22.3384	22.8616	23.8303	24.3316	23.1059	23.887	23.5985	23.9802	NA	23.837	23.6796	24.8989	25.25
P58871	98	Tnks1bp1	1	21.8105	NA	NA	23.1485	NA	NA	NA	NA	22.3889	NA	22.9316	23.102	NA	NA	NA	NA	NA	22.1112	22.5956	21.8927	22.3747	23.0715	22.8025	22.5831	22.9894	22.5656	22.5606	22.9624	22.0201	NA	21.9881	NA	NA	NA	21.8798	21.9635	22.5956	22.1937	22.275	22.3766	NA	NA	NA	NA	22.7022	22.0745
Q8BFY9	47	Tnpo1	1	21.1619	21.1898	21.6519	21.7513	NA	NA	21.51	21.5258	20.7143	21.2455	21.2398	20.679	21.8011	NA	21.5841	NA	21.5649	21.0736	21.5776	NA	21.2719	20.1124	NA	21.3754	21.5449	21.2647	20.332	20.7748	21.3551	21.7405	NA	NA	NA	22.1897	22.2629	21.2141	21.0259	NA	NA	NA	NA	NA	NA	NA	NA	NA
Q01320	108	Top2a	1	22.4607	22.3633	23.0599	NA	NA	NA	22.445	22.331	22.2641	22.2476	21.729	22.8709	24.2484	22.609	22.7327	22.9662	23.4951	22.5342	22.6694	23.0136	22.9799	23.4781	23.642	23.4415	23.5367	23.2535	22.4673	22.7362	23.135	23.4494	23.5472	23.2451	22.9372	22.8878	22.9047	22.7247	22.4306	24.293	24.2767	24.6968	NA	NA	24.6411	24.2742	23.5788	23.7424
Q921T2	79	Tor1aip1	1	21.7689	21.3117	21.8535	21.5186	NA	NA	21.7727	21.5603	21.1814	21.2726	21.7513	21.1996	22.7297	21.6632	NA	22.0285	21.6389	21.6198	21.2241	22.1856	22.9707	22.1291	22.5831	NA	23.2609	22.5841	21.7768	22.4096	21.4631	21.9817	21.9175	NA	NA	21.977	21.6371	21.3326	21.6179	20.6682	21.4533	21.9914	NA	21.6193	21.878	22.1238	21.3581	22.0803
P02340	78	Tp53	1	23.1398	22.387	24.6365	23.7246	NA	NA	23.9627	24.3483	22.5435	23.1316	22.2398	24.0731	22.8349	23.0597	NA	23.1558	23.1848	22.0048	21.9825	NA	23.4636	23.8645	22.8243	NA	24.289	24.2036	22.5002	NA	21.3504	23.413	22.4703	NA	22.8965	22.9048	21.8948	21.3371	23.9195	22.943	23.8956	23.7777	23.2826	23.4396	23.6599	23.765	21.8948	23.4707
Q9CYZ2	31	Tpd52l2	1	20.6583	19.8454	20.6467	19.9113	NA	NA	20.83	20.3776	20.2033	NA	21.2292	20.7737	NA	21.4125	NA	21.7871	21.2966	21.2428	21.4791	NA	20.1637	20.0293	21.3672	21.802	20.5587	20.9443	20.4342	20.9912	21.2212	20.9179	22.1421	NA	NA	22.2857	21.3631	21.833	21.4121	NA	NA	NA	NA	NA	21.2201	NA	21.8587	21.8938
P17751	301	Tpi1	1	26.806	24.15	24.0511	24.8348	25.0797	25.918	25.6561	24.4188	24.9673	23.9787	23.6619	24.7257	25.2134	23.5201	24.4708	24.1174	23.4106	23.7922	23.9221	26.3806	24.4093	23.7091	26.2513	27.3786	24.1436	24.2142	24.5829	24.8425	23.6568	23.6882	24.1404	25.5729	NA	24.5306	24.4954	24.4465	23.8944	24.111	24.0803	24.5454	24.4767	25.7586	24.3905	24.4262	24.7025	24.6878
P58771	287	Tpm1	1	26.8342	24.948	25.0867	24.7903	25.3434	NA	25.1988	25.2313	25.2445	26.2054	26.1651	25.9272	25.1953	25.4167	26.4613	24.6748	25.3265	26.0906	26.7059	26.4729	25.4745	25.1435	24.7968	25.2813	24.9507	25.6246	25.5748	25.7654	26.2913	25.9959	25.0922	25.5441	25.7783	25.204	25.1429	25.8161	25.7415	25.6588	24.7589	25.586	24.9682	25.094	25.7029	25.4818	26.7741	25.9676
P58774	92	Tpm2	1	24.1496	22.3162	22.4576	22.4482	NA	NA	23.2723	22.5485	23.0208	23.4401	23.8087	22.8224	22.8126	23.4832	25.2812	22.2338	22.4034	23.7142	23.0955	23.4244	24.0154	23.373	23.8074	25.0315	22.9671	23.0651	23.6721	22.4325	23.7646	23.23	23.1898	23.1943	NA	24.1613	23.8312	23.5021	23.7343	22.3353	22.9975	23.0679	NA	NA	22.6577	23.8022	23.4978	23.8369
P21107	52	Tpm3	1	24.0899	22.4656	23.2092	22.7982	22.405	NA	23.3746	23.2078	23.3906	23.0757	22.9182	22.7872	NA	22.656	NA	22.6963	22.9826	22.828	23.3999	23.0455	22.7069	23.8814	22.7305	NA	22.7026	23.8514	23.7155	23.8475	22.813	22.9598	22.9387	23.5595	NA	23.3665	23.1399	23.4033	23.2436	22.941	23.1201	23.1687	23.674	23.0737	22.7876	23.0174	23.6413	23.7973
Q6IRU2	353	Tpm4	1	27.2412	25.2839	25.5389	25.5708	25.5365	25.7456	25.4471	25.5246	25.4615	26.1724	25.9242	25.7084	26.9602	25.9454	NA	25.6367	25.601	25.9277	25.04	25.9752	25.7433	25.1727	25.8023	25.088	25.1919	25.6611	25.4054	24.8478	25.3318	25.2985	24.9794	25.7156	24.8054	24.7784	25.0215	24.998	25.4569	25.6505	25.3439	25.4741	25.6725	25.55	25.5023	25.8413	25.8091	25.9497
F6ZDS4	83	Tpr	1	21.7755	22.5442	22.2772	21.9109	NA	NA	21.4585	21.9705	21.7653	21.9244	21.19	22.154	NA	22.8249	NA	21.967	22.5263	22.2891	21.7187	22.0225	22.4195	22.182	21.6968	22.6104	22.0563	22.0349	21.9912	21.9563	22.2962	21.9935	21.8531	NA	22.4667	22.6623	22.2859	22.6323	21.9409	22.2582	22.0944	22.091	22.3353	22.1582	22.4474	22.4228	22.3525	21.9802
P63028	88	Tpt1	1	25.3253	22.7396	23.3926	23.3567	24.0591	NA	24.8611	23.4214	23.7544	23.1566	22.8527	24.0593	23.5223	23.3761	25.6538	23.3406	23.4578	23.514	23.0516	24.1532	23.7542	23.2556	23.7885	NA	23.8274	23.8341	23.5847	22.999	22.4534	23.7641	23.0096	NA	23.7647	22.4759	23.4556	22.8749	22.9693	23.4535	24.0099	23.206	23.8346	NA	22.9201	22.752	23.384	23.5088
Q6PFR5	36	Tra2a	1	20.6526	21.9807	21.5276	21.8003	NA	NA	20.9347	21.3791	21.4412	22.1241	21.4174	21.9346	NA	20.4912	NA	21.7542	20.1541	21.777	21.5182	NA	NA	NA	NA	NA	NA	NA	NA	NA	21.1453	21.3637	20.402	21.1344	20.2977	21.5025	20.9697	21.1618	20.8789	21.6684	21.2263	21.2074	21.9223	NA	20.9901	21.405	21.3431	21.2599
P62996	58	Tra2b	1	23.2584	23.2598	23.9079	23.39	NA	NA	23.0833	23.6256	23.784	23.602	23.2973	23.5367	NA	23.3055	22.6503	23.3341	23.3856	23.1962	23.2956	23.5113	23.3606	23.1388	22.7331	NA	22.9853	23.6752	23.7237	22.9573	22.5647	22.9456	22.7009	22.9884	NA	22.7982	23.1728	23.4977	23.2716	23.6732	23.9309	23.9642	23.4944	23.7237	23.5508	23.6201	23.9361	23.9919
Q9CQN1	59	Trap1	1	22.0329	21.53	22.3651	21.577	NA	NA	21.8758	21.4129	22.5654	21.5227	21.7713	21.3208	21.8849	21.6328	NA	21.8954	21.4005	21.6421	21.6416	22.3389	21.9136	21.8143	21.7	23.0916	21.5815	21.942	22.1514	22.2332	22.4483	21.503	22.0863	NA	NA	22.0318	22.2875	22.0361	22.0773	22.0535	21.3475	21.9943	NA	22.534	21.8981	21.8893	21.9614	22.1166
O55013	20	Trappc3	1	20.3085	19.3997	19.7765	20.3411	NA	NA	19.7539	19.2792	19.79	18.9836	20.2673	20.4945	NA	20.3231	NA	21.1117	20.5231	20.0046	19.0533	NA	20.8918	20.1638	NA	20.2161	19.2474	20.1163	20.386	18.1604	19.9341	20.0349	19.8803	NA	NA	19.7541	19.8545	20.2173	19.104	20.4643	20.5753	20.4763	NA	NA	20.2763	20.4751	19.8629	20.5338
Q62318	205	Trim28	1	23.6562	23.348	23.7266	23.771	24.1394	NA	23.5576	23.7815	23.5963	23.6295	23.8311	24.1763	23.142	23.2331	NA	23.8659	24.0315	23.7446	24.185	23.5679	23.8696	23.5213	23.3835	23.4345	23.6614	23.8961	24.179	24.0815	24.0504	23.6643	23.4572	23.8059	23.6619	23.739	24.3355	23.8195	24.1462	24.1647	23.8669	24.2152	23.8783	23.2978	23.9093	24.2444	24.1819	24.0469
Q9DCG9	19	Trmt112	1	22.0244	NA	NA	NA	NA	NA	NA	NA	NA	NA	23.6093	21.9759	NA	23.3183	NA	21.5709	22.9134	22.5315	22.8957	22.7232	22.7763	22.895	23.0716	NA	23.1371	22.5688	22.799	23.3177	22.639	22.5164	21.8614	NA	NA	22.2282	22.4266	22.7976	21.8201	22.5379	21.537	21.5995	NA	NA	22.4457	21.9328	22.8219	21.766
Q9QY33	26	Tspan3	0.9992	20.4982	21.1672	20.3122	19.8063	NA	NA	21.1131	20.8524	20.4589	20.1887	20.2286	20.2553	NA	NA	NA	19.8446	21.0663	20.3458	19.6649	NA	NA	NA	NA	NA	NA	NA	NA	NA	NA	20.0344	20.17	NA	NA	20.4499	20.5027	19.2258	19.3725	21.1669	20.3743	20.6691	NA	NA	20.9595	21.3864	20.602	20.5233
Q3UDE2	90	Ttll12	1	22.2912	22.2997	21.7232	21.5917	NA	NA	22.5612	22.0633	22.0247	22.6666	22.1988	22.2293	NA	NA	NA	21.4622	21.8005	22.2727	21.7518	23.5832	22.3415	22.3595	22.8521	NA	23.1843	21.6482	22.0751	21.5163	22.4368	22.9267	21.4658	NA	NA	22.5495	22.0609	21.8451	22.2585	21.9162	22.5314	22.1865	23.1922	NA	22.0461	22.4106	22.511	22.247
P68369	776	Tuba1a	1	28.2534	27.6272	27.7006	27.324	26.7047	26.793	27.2215	27.3252	27.5496	27.9377	27.7739	27.5788	27.222	27.6477	27.4772	27.4323	27.5291	27.9575	27.6688	26.7207	27.5253	27.4549	27.7316	26.705	27.6086	27.4133	27.7156	27.7361	27.6147	27.5785	27.5623	26.5503	27.4704	27.6725	27.9365	27.5893	27.9915	27.5364	27.2998	27.108	27.0447	27.2008	27.2919	27.2331	27.2526	27.578
P68368	66	Tuba4a	1	25.8901	26.5243	25.1747	25.5751	NA	NA	24.6262	26.0847	26.0631	26.3712	26.3342	24.7583	NA	NA	NA	25.2078	25.5322	25.65	26.3884	28.532	28.169	27.502	28.2364	26.7811	26.2215	25.7615	25.7479	27.6408	24.756	24.9381	25.12	NA	NA	26.0271	25.6899	25.4299	25.6572	25.5037	25.2842	26.4635	27.5016	25.0257	25.5884	24.9406	25.6655	25.3097
Q7TMM9	63	Tubb2a	1	23.9067	23.8951	24.1938	23.1485	NA	NA	23.0213	23.7032	23.1579	23.6849	23.9216	24.0526	23.5796	22.8866	NA	23.8387	24.2383	24.1665	22.7536	22.5016	23.9147	23.3523	23.6746	22.6382	23.7654	24.0666	24.0349	22.5806	23.8219	23.2844	23.9965	NA	22.9923	24.1164	23.4143	23.8336	23.7064	23.2925	23.4938	23.7082	23.4891	NA	23.7518	23.3114	23.4193	23.5948
P68372	105	Tubb4b	1	24.8625	23.8382	24.3773	24.2306	NA	NA	25.659	24.4995	24.6797	24.8042	24.5312	24.3418	24.2172	24.6027	NA	24.5019	24.7947	25.0937	24.4486	24.2646	24.2063	24.385	24.0925	NA	24.6799	24.5967	23.9449	24.283	23.2978	24.3945	24.3706	NA	25.5087	24.0903	24.0967	23.6384	24.311	24.5214	25.5728	24.9364	23.7666	NA	24.3069	24.1033	24.2022	24.4948
P99024	727	Tubb5	1	27.9382	27.6672	27.687	27.2177	26.9999	27.9418	27.2028	27.5198	27.6275	28.006	27.8082	27.4261	27.4132	27.5372	27.2039	27.7686	27.9492	28.3441	27.8718	26.4964	26.9068	27.1965	27.4134	27.8096	27.2325	27.364	27.7499	27.5441	27.4021	27.2374	27.1926	27.0806	27.55	27.6541	27.6948	27.4004	27.8057	27.4477	27.578	27.4416	26.6699	27.1566	27.2741	27.3468	27.183	27.3729
Q922F4	64	Tubb6	1	22.9482	21.9739	22.995	22.6092	NA	NA	22.4058	23.0062	22.0738	23.1565	23.226	22.6644	23.6077	22.4663	NA	22.8563	22.8762	22.4853	22.7088	21.3381	22.9762	23.1299	23.4158	NA	23.1451	22.6661	22.3822	22.5071	22.6774	22.438	23.3948	NA	NA	23.4108	22.9405	22.7695	22.4141	22.9149	23.1669	23.1011	NA	NA	22.5013	21.5315	21.9313	21.5992
Q8BFR5	82	Tufm	1	22.2084	22.9952	22.6088	23.3033	NA	NA	22.5952	22.6587	22.9778	23.4127	22.6277	22.581	23.919	NA	23.0892	22.7106	23.1638	22.2467	22.5459	23.1876	22.6136	21.9725	23.0648	NA	22.0073	22.7821	22.5915	22.6928	23.0785	22.5182	22.4246	22.7339	22.3901	22.6291	22.0956	23.2111	23.3034	23.3551	22.9705	23.3684	23.267	22.7309	23.2432	22.6621	23.3411	23.4942
Q91YR1	95	Twf1	1	22.3778	22.8536	22.855	22.8073	NA	NA	23.6112	22.8747	22.2216	22.7286	22.7059	22.4627	NA	22.4146	NA	22.731	22.2236	22.7161	21.9672	22.7446	22.5239	21.0782	NA	NA	21.9065	21.7738	21.5224	21.8024	23.2612	23.2105	21.8124	NA	22.9771	22.5107	21.5313	22.4386	22.0537	23.9233	23.2641	21.5974	NA	NA	22.4647	22.1908	22.2055	22.5626
P10639	173	Txn	1	26.2681	24.229	24.5558	24.7368	NA	NA	25.111	24.7531	24.3934	24.3489	24.4667	25.0172	25.923	26.2168	26.0789	25.3955	25.6503	24.7003	24.665	24.6335	24.1507	24.2821	23.8246	25.0027	24.2588	24.3604	23.865	23.3199	24.1273	23.7851	24.6299	NA	26.1472	23.7536	25.0316	24.3937	24.4246	23.0151	24.2614	23.7692	NA	NA	24.6404	25.2231	24.169	23.9057
Q9CQU0	46	Txndc12	1	22.4234	21.77	21.0802	21.4796	NA	NA	22.1744	21.5694	21.9846	21.6628	20.8217	20.7389	NA	NA	NA	NA	21.1329	21.3846	21.039	NA	NA	21.7278	NA	NA	NA	22.2257	20.4913	20.9971	21.0547	22.1683	20.6061	NA	NA	21.6842	21.9299	21.6508	21.591	NA	NA	21.5037	NA	NA	NA	20.872	21.6605	21.0347
Q91W90	194	Txndc5	1	24.1592	22.8449	22.7741	22.9575	24.2292	NA	23.3777	23.2325	23.1845	22.2955	23.4085	22.891	23.5006	23.5581	NA	22.6962	22.774	23.2321	22.7115	22.9614	22.3139	22.3539	22.9747	NA	22.9347	22.7017	23.6153	22.2038	22.9785	22.6463	22.8007	23.4998	24.4998	23.339	23.4471	23.2953	23.4777	23.2987	22.8224	22.7935	NA	NA	23.1468	23.2414	23.6821	23.705
Q8CDN6	123	Txnl1	1	23.5013	22.192	22.2763	22.0637	NA	NA	23.2012	22.1404	22.952	22.0817	22.6662	22.1688	23.8758	NA	NA	22.6782	23.5013	21.9165	22.1222	NA	21.9608	22.7071	22.4295	NA	23.2031	22.0773	21.7847	21.8254	22.6777	21.7829	22.4346	NA	NA	22.8114	22.7617	22.6547	21.3367	22.2655	22.5982	22.8695	NA	NA	22.8365	22.9045	23.011	23.1533
Q9JMH6	62	Txnrd1	1	21.877	NA	21.1786	21.4884	NA	NA	21.694	21.2262	20.944	20.7656	21.1565	21.2263	23.121	23.5861	NA	21.308	21.7643	20.8622	20.7314	NA	NA	NA	NA	NA	20.9367	20.9956	20.4241	21.6855	21.0962	22.0637	23.3599	NA	NA	23.0285	21.0284	21.6403	21.1084	NA	21.0645	21.952	NA	NA	NA	NA	21.1785	21.9869
Q9D883	60	U2af1	1	22.9589	23.455	23.796	23.5407	22.5099	NA	23.4847	24.2961	23.312	23.9994	23.2134	23.7761	NA	23.0968	NA	23.4021	23.2857	23.4194	23.4031	23.0357	23.9613	23.5373	23.6531	22.4728	23.1973	23.6615	23.8019	23.5492	22.5886	23.6082	23.2459	22.7012	NA	23.7305	23.7089	23.1701	22.976	23.6644	23.3764	23.725	22.8582	NA	23.4389	23.7782	23.5392	23.5797
P26369	55	U2af2	1	22.7735	23.0125	22.7378	22.1238	NA	NA	22.4089	23.0632	22.1491	22.3153	21.9178	22.7612	NA	21.4265	NA	21.4664	22.1697	22.9354	22.4403	22.0378	22.7438	21.9249	21.6344	NA	22.7757	22.5518	22.593	22.6896	21.6809	22.611	22.9006	NA	21.8045	22.1864	22.7974	22.5719	22.0523	22.2377	23.0535	22.8378	22.9429	NA	22.6943	22.9302	22.3541	22.0707
Q3TW96	156	Uap1l1	1	22.8682	23.2761	22.4899	22.2079	NA	NA	22.237	22.9478	22.5177	22.1033	22.3984	22.1154	NA	22.4812	NA	22.8829	21.9485	23.0326	21.8771	23.0819	22.8869	22.4847	23.3659	23.9951	23.7734	22.7676	22.5828	23.0206	22.8637	22.5154	22.3947	NA	NA	21.9081	22.3023	22.6573	22.0956	21.8057	22.7789	21.9732	NA	NA	22.569	22.1064	22.4414	22.1884
Q02053	402	Uba1	1	24.1093	23.4601	22.9876	23.1592	24.3845	24.0604	23.5159	23.7526	23.1892	23.3622	23.2971	23.2155	24.1737	24.3156	23.8642	23.8694	23.6916	23.0769	23.5172	23.4044	23.6933	23.4999	23.4982	23.4435	23.6058	22.9495	23.2756	22.9969	23.8078	23.0888	23.7954	24.4557	23.6932	23.6399	22.8641	23.1576	23.2089	23.3881	23.2468	23.2511	23.6254	23.5477	23.4633	23.0969	23.3285	22.8634
Q9Z1F9	76	Uba2	1	21.7812	NA	21.4642	NA	NA	NA	22.0617	NA	22.0214	20.7338	21.4416	22.2147	NA	NA	NA	22.2158	NA	22.1673	21.8298	NA	21.488	NA	NA	NA	21.1661	NA	21.5926	22.0969	21.8825	21.9561	21.8796	NA	NA	22.0937	21.4117	21.6859	21.2755	22.5526	22.3625	22.0443	NA	NA	21.947	22.073	21.8648	22.1101
P63279	32	UBE2I	1	21.2014	21.8126	21.5202	20.6285	NA	NA	NA	21.8284	22.1002	22.1444	20.6441	21.1095	22.2538	NA	NA	22.1314	20.7863	20.7963	20.6372	NA	20.188	20.9756	21.7114	NA	21.4274	21.5721	22.1049	21.6234	21.0575	20.7147	21.4577	NA	NA	20.3717	20.8325	21.0667	20.9262	NA	NA	NA	NA	NA	NA	NA	NA	NA
P68037	69	Ube2l3	1	22.7961	22.3562	22.7088	21.2979	NA	NA	NA	21.4537	21.9716	22.137	22.9167	23.2028	21.5615	22.271	NA	21.1614	21.9303	22.7272	22.3557	22.537	22.5668	23.1472	23.03	23.8851	21.8328	21.3218	22.7779	22.7761	22.5693	22.8153	22.4635	22.0574	NA	22.1265	22.0064	23.4895	23.3457	23.2884	22.9574	22.4161	NA	NA	22.2124	22.833	23.2323	23.1864
P61089	110	Ube2n	1	23.5279	22.9468	23.721	23.2413	NA	NA	22.6051	23.3189	22.7433	23.7429	23.4333	23.7781	23.7207	23.129	23.0175	23.7338	23.7001	23.403	23.4294	NA	23.476	23.9059	23.376	23.6129	23.7051	23.8203	23.5566	23.1743	23.7494	23.3639	23.7068	NA	23.2482	23.8022	23.9556	23.9453	23.7106	22.8991	23.5017	24.2662	23.001	23.1401	23.396	24.0349	23.6448	23.6388
Q9CZY3	83	Ube2v1	1	23.382	23.3253	22.9479	23.3446	23.3957	NA	25.7137	22.8139	23.2952	23.5217	23.7585	23.7245	23.0398	23.7286	23.4003	23.6308	22.8137	24.051	23.8813	23.0951	23.0939	24.0189	23.1929	24.1403	23.8062	23.3842	23.1192	23.7068	23.5	23.519	23.4024	23.8859	24.4453	23.6226	23.7918	23.2453	23.4594	22.9744	23.8624	23.2337	NA	23.3734	23.8927	23.2547	23.411	23.2515
Q9QZM0	63	Ubqln2	1	22.5338	23.2797	22.3667	23.5158	NA	NA	NA	22.6223	23.7209	NA	23.0001	23.0672	23.293	NA	23.6075	23.2081	23.349	22.8973	22.7725	NA	23.1353	23.4735	NA	NA	22.8725	22.5733	22.5855	22.8431	23.164	22.9711	23.2532	NA	23.1983	23.7626	23.2326	23.2592	22.5967	23.2027	23.2695	23.4844	23.5478	23.4793	23.4239	23.469	23.1093	23.3287
Q922Y1	69	Ubxn1	1	22.2532	22.7565	23.4011	23.145	NA	NA	NA	22.8801	23.1818	22.9376	22.8476	23.208	22.8176	22.6065	NA	22.4531	23.3931	23.0709	22.7351	NA	23.644	23.21	22.5827	NA	22.8522	23.4262	23.3843	23.3014	23.4269	23.3063	23.0264	NA	22.5994	23.7005	22.7534	22.8782	22.8198	23.6786	23.3133	23.5092	NA	NA	NA	23.3478	23.5009	23.0628
O70475	78	Ugdh	1	22.47	23.1783	22.5728	23.1461	NA	NA	22.669	22.3678	23.5589	23.5251	22.6157	22.2546	23.3477	NA	NA	22.6276	23.2931	22.2733	23.1262	22.3763	22.7811	22.3324	22.8206	NA	21.7387	22.4817	22.6575	22.6631	22.2418	22.6131	22.9576	NA	NA	22.4035	22.8673	22.4775	22.0878	23.0406	22.8105	23.1074	NA	23.0556	23.1883	22.9967	22.8733	22.1521
Q6P5E4	223	Uggt1	1	23.2824	23.2954	23.1699	23.0838	NA	NA	22.5779	23.3983	22.9693	22.541	22.6126	22.6468	23.81	23.3818	NA	22.7676	22.6941	22.3909	22.3006	23.3007	23.326	22.8696	NA	NA	23.7084	22.9042	22.807	23.1779	22.8562	22.7994	22.9483	23.7492	NA	22.6698	22.966	22.7634	22.8651	22.8891	23.5093	23.3862	NA	NA	23.1866	22.6932	22.8552	23.0444
Q91ZJ5	42	Ugp2	1	21.4833	22.0626	21.7379	22.0967	NA	NA	21.3717	NA	22.4844	21.7839	22.1563	21.9141	22.169	22.6724	21.8744	22.3505	21.8611	22.0918	22.1707	21.9261	20.8979	21.5175	NA	NA	21.9722	21.3357	21.7532	21.5769	21.5908	21.0558	21.3023	21.7216	20.8347	21.0918	21.5825	20.907	21.8875	21.7557	20.8153	21.8225	NA	21.4093	21.6441	21.5721	21.7203	22.0165
Q8R1I1	33	Uqcr10	1	21.5291	22.9588	22.7272	22.5892	21.8657	NA	22.0582	22.1706	22.5115	22.8615	21.9157	21.4631	NA	22.5887	21.8507	22.3194	22.5268	22.3614	21.5655	22.7776	22.5974	21.2894	22.7404	20.7623	21.4531	21.7992	23.2309	21.3749	21.6805	21.4408	22.3186	22.2731	21.0319	22.1834	21.8029	22.3454	21.9535	22.3536	22.4222	22.4668	22.8794	NA	22.7912	22.9653	22.9848	22.818
Q9CZ13	107	Uqcrc1	1	23.051	22.5803	21.3285	21.7337	NA	NA	22.3869	21.5657	22.3009	22.2948	22.4491	22.5198	22.8238	22.7351	NA	22.469	22.339	22.402	22.2176	22.9051	21.801	22.4568	22.9544	NA	NA	23.5613	22.2964	23.04	22.1433	22.3274	22.4503	NA	22.7752	22.3465	22.4016	22.3506	22.2685	21.3525	21.7191	21.6915	22.4266	23.1279	22.2737	21.2217	22.4206	22.1852
Q9DB77	81	Uqcrc2	1	23.3232	22.0781	22.6225	22.9023	NA	NA	23.2093	22.7808	22.9277	23.3616	23.1223	22.6322	23.0384	23.3427	NA	22.6831	23.1129	22.8741	23.4563	23.4922	22.5673	22.6931	22.9549	NA	22.6176	22.7948	22.9849	22.9228	23.5312	23.5918	23.2445	NA	NA	22.8449	23.4373	23.7954	23.1294	23.2307	23.0262	23.0868	23.6869	NA	22.7546	23.7563	23.5974	23.5352
Q9CR68	33	Uqcrfs1	1	21.4467	NA	NA	NA	NA	NA	NA	NA	NA	NA	21.8883	22.2572	NA	NA	NA	22.0796	22.1192	21.5671	22.1086	22.7559	22.1849	22.3706	22.1773	NA	22.1855	21.7847	22.7688	22.6016	22.8757	22.7204	22.5821	21.2893	NA	22.4903	22.4057	22.7819	22.823	21.629	22.0977	22.2275	21.8491	21.4062	22.3606	22.0949	23.0638	22.6116
P99028	30	Uqcrh	1	23.0109	23.8061	22.7733	22.5357	NA	NA	23.2255	22.9849	23.479	23.684	22.5869	22.5954	NA	NA	NA	22.5366	22.3742	23.1439	22.8489	NA	23.6877	23.0621	NA	NA	22.6332	21.6704	23.4144	22.5507	22.9516	21.9071	22.2184	NA	NA	22.0225	21.9605	23.5161	23.1283	22.1123	22.3458	22.2581	23.1537	NA	21.6172	23.1897	23.0136	22.834
Q9Z1Z0	107	Uso1	1	22.4156	22.1147	22.3427	22.6291	NA	NA	22.0119	22.4571	22.7085	22.9376	23.489	22.815	NA	22.7594	NA	23.3092	22.5129	22.7743	23.0234	22.1037	22.2208	21.8759	22.2349	NA	22.329	22.0901	22.4229	22.5967	22.8572	22.407	22.5106	NA	NA	22.7238	22.3341	22.834	22.8107	22.7824	22.6545	22.1134	NA	NA	22.2093	22.6505	22.537	23.0165
Q9JMA1	45	Usp14	1	21.4871	22.198	21.921	21.7282	21.9323	NA	21.788	22.3211	21.8074	21.5632	21.958	21.6092	21.7604	22.0413	NA	21.7995	21.6068	21.6363	21.9767	NA	22.2282	21.6744	20.971	NA	22.2864	21.5869	21.5192	21.2604	21.5447	22.2997	21.6762	NA	NA	21.9572	21.9709	21.7875	21.7713	21.9112	22.096	21.8817	NA	NA	21.2231	21.5822	21.3827	21.2889
P56399	128	Usp5	1	22.4079	22.2128	21.8881	22.5986	NA	NA	22.8886	23.182	22.4518	22.6149	22.511	22.6468	22.3353	22.8191	23.5991	22.8008	22.857	22.4105	22.6371	22.7566	22.3691	22.8889	22.8689	23.3228	23.5837	23.1189	22.5635	22.8383	21.8863	22.0908	22.1441	23.111	23.1075	22.577	21.9837	21.8635	22.1413	23.8266	23.3637	22.6807	24.0898	23.361	24.306	22.9916	22.2508	23.0972
Q9WV55	117	Vapa	1	23.5347	22.701	22.7709	23.0957	NA	NA	21.9786	23.0977	22.8728	22.3819	22.7873	22.4907	22.4724	22.6532	NA	22.7031	23.2946	22.7306	23.4669	23.6212	23.1572	22.9682	23.299	NA	22.9304	22.8581	23.2991	23.0057	22.7342	22.7025	23.141	23.4864	24.0478	22.7383	22.5611	23.1091	23.1084	23.3237	22.6242	23.3104	23.2979	24.3326	23.4579	23.1505	22.9039	23.2966
Q9Z1Q9	113	Vars1	1	22.4601	22.9	22.2065	22.366	NA	NA	22.943	22.325	22.7031	22.6496	23.0018	23.1737	23.5787	23.0537	NA	22.9019	23.0051	22.8156	23.0581	22.6728	23.302	23.0228	22.9714	22.7972	22.7086	22.857	22.9107	22.751	22.4628	22.1876	22.334	23.9331	23.0853	22.4395	23.0464	22.8006	22.8374	22.9378	22.6569	22.4249	21.9607	NA	23.167	22.2405	22.3921	22.985
Q62465	156	Vat1	1	23.3685	23.4503	23.072	23.3317	NA	NA	NA	22.5123	23.17	22.8553	22.7278	23.0805	23.527	NA	NA	23.7537	23.1808	23.3086	23.4138	23.0888	23.457	22.9557	23.4166	NA	23.1089	23.0798	22.7719	23.3072	22.6562	22.6726	23.4327	NA	NA	23.5452	23.7697	23.2858	22.9457	22.427	22.7029	23.1919	NA	23.4398	23.2648	23.0994	23.2722	22.9261
P29533	38	Vcam1	1	20.9207	19.9368	19.9287	21.1799	21.3533	NA	NA	19.7988	20.1128	NA	20.6808	20.371	21.2155	NA	NA	20.7041	20.1585	20.1786	20.1316	20.3779	NA	NA	NA	NA	20.4604	19.1042	19.7827	20.2442	20.1635	19.4749	18.818	NA	NA	19.1211	20.553	20.183	20.0509	21.3096	20.6457	21.0893	NA	NA	20.6596	20.2903	20.2667	20.6937
Q64727	771	Vcl	1	24.5973	24.3145	24.8375	24.4386	24.514	25.5657	24.363	24.6355	24.2782	24.6613	24.251	24.6209	24.2671	24.0935	25.0094	24.1454	24.0377	24.2493	24.4818	24.0104	24.1381	24.16	24.1866	24.7711	24.4527	24.669	24.4294	24.275	24.0952	24.4263	23.5491	24.2763	24.4693	24.0231	24.3674	23.7281	23.6796	23.616	24.0642	24.3555	24.1252	24.3828	23.8471	24.2652	24.4168	24.0656
Q01853	616	Vcp	1	24.9022	24.0485	23.9316	23.9094	24.3536	24.5146	24.325	24.0481	23.9241	23.7314	24.0926	23.9848	23.768	23.9036	24.7033	24.5427	23.5894	23.9894	23.6034	24.3805	23.8023	23.7681	23.8	24.1829	23.7548	23.7866	23.9346	23.7453	23.8752	23.8165	24.053	24.6556	24.6277	23.3566	23.6478	23.9469	23.9395	24.1064	23.5841	23.4506	23.9986	24.6597	23.7862	23.8647	24.1758	24.3892
Q60932	342	Vdac1	1	25.5327	23.8155	23.7583	23.9655	24.0719	NA	24.5224	23.5229	23.8637	23.9179	23.9765	23.7138	25.6205	24.465	26.2029	24.3331	25.0293	24.0207	24.1131	24.6502	23.4014	23.7811	24.5238	NA	24.006	23.6009	23.6751	23.4158	23.9161	23.3027	24.0852	24.484	25.0378	23.5115	24.0099	23.75	23.9389	24.3066	23.9038	23.9852	24.7816	24.6202	24.0585	24.7788	23.9171	24.2357
Q60930	206	Vdac2	1	24.1408	22.817	22.5127	22.5791	NA	NA	23.7379	22.9448	22.6492	21.9337	22.0344	22.6237	NA	NA	24.5514	22.8753	22.7416	21.5274	23.0111	23.3025	22.2677	22.9324	22.1471	NA	22.8864	22.3877	22.288	22.3398	23.0923	22.5083	22.9972	24.7603	NA	22.9368	22.986	22.4239	22.4548	21.7721	22.8587	22.2427	NA	NA	22.0131	23.1509	22.6984	22.4894
Q60931	121	Vdac3	1	23.6228	23.3022	22.7988	22.6072	NA	NA	23.1169	22.925	22.3688	23.0405	22.9065	22.8601	NA	22.9199	NA	23.2515	23.1252	22.4132	22.4858	23.2056	22.6627	21.599	22.6007	NA	22.232	22.994	22.667	22.3309	22.5906	21.5575	22.4072	23.4171	22.9043	23.1364	22.5564	22.515	23.3084	22.4773	22.7968	22.5067	NA	NA	22.3815	23.3114	22.6115	22.6424
P20152	1232	Vim	1	28.663	28.321	27.9361	27.738	28.2709	26.9567	28.3154	28.0449	29.0027	29.1151	29.2639	27.9161	27.3366	28.5702	27.3747	28.304	29.1732	29.9021	28.674	29.3408	27.6695	27.0174	28.8236	27.5053	27.6362	27.8999	29.2027	29.1598	28.8301	28.0075	27.3932	28.1881	27.6275	27.5752	28.061	29.0729	29.1757	29.4411	28.4893	28.3646	28.6626	27.7323	27.8589	28.8696	29.6752	29.8865
Q9QZ88	45	Vps29	1	22.0701	22.5443	22.6635	22.6226	NA	NA	22.3068	23.1745	23.076	22.7968	NA	NA	NA	NA	NA	NA	NA	NA	NA	22.2802	21.6101	21.4216	22.2006	NA	22.0806	21.2446	21.7195	22.606	21.4358	21.9105	NA	NA	NA	22.8884	22.0703	21.0298	21.5046	20.6602	21.5413	21.4203	NA	NA	21.4763	22.0089	21.3568	21.3515
Q9EQH3	126	Vps35	1	22.4286	23.0804	23.4151	23.1662	NA	NA	23.8435	23.3796	23.3725	23.431	22.9178	22.9236	22.4514	22.8936	23.1131	23.6	23.2207	21.9728	22.5194	24.1102	23.7844	23.3358	24.382	23.121	23.6066	22.6116	22.3569	22.9362	22.8418	22.9932	22.8428	23.8116	22.5348	23.3554	23.2634	22.4148	22.5011	22.4139	23.2822	23.0877	23.0246	24.0969	22.919	23.3872	22.8171	22.5179
O88342	235	Wdr1	1	24.188	22.3729	22.5062	23.276	24.2436	NA	24.079	23.7558	23.2034	23.1082	22.8581	23.2667	24.3724	24.1732	24.2604	23.7272	22.1317	22.7324	22.2106	23.0814	22.9887	23.1559	23.0638	NA	23.3168	22.5201	22.5591	22.2106	23.1719	22.7756	22.5569	23.6519	NA	22.4494	23.2943	22.8256	22.9389	22.4588	22.3239	22.7699	23.5621	24.2204	22.8614	23.0283	22.9537	23.0705
Q6P1B1	107	Xpnpep1	1	23.1787	22.574	22.9203	22.8285	23.8133	NA	23.0655	22.3329	23.4582	22.7207	22.8164	22.5882	24.19	21.797	NA	23.286	23.4464	23.6194	23.1776	22.7005	22.8896	23.4783	22.4485	NA	22.6998	23.1499	22.7698	22.9322	22.0704	22.0338	22.6799	NA	NA	22.0338	22.9903	22.5108	23.3278	22.2344	22.4765	23.2914	NA	NA	22.3509	23.2021	22.8018	22.7322
Q91WQ3	162	Yars1	1	22.6767	22.8893	22.6234	22.7446	NA	NA	22.7489	23.2248	22.809	22.3238	22.7559	22.6911	22.5425	22.8865	NA	22.5387	22.54	22.7333	22.4283	22.5608	23.0277	23.2567	22.9704	NA	23.3405	23.0006	22.8793	23.0378	21.9972	22.2661	22.6226	NA	21.954	22.9879	22.7193	22.3689	22.5432	22.7584	22.5826	22.3009	NA	NA	22.4802	22.6825	22.6328	22.2502
P62960	241	Ybx1	1	25.0951	25.2743	24.9776	25.5363	NA	NA	24.9465	24.4474	25.5783	24.4684	24.0921	25.3803	23.4094	NA	25.3325	24.5661	24.1329	24.2636	23.7257	25.0501	24.7043	24.0639	23.9735	NA	24.4816	25.0576	24.6284	24.771	24.2307	24.8205	23.7483	24.1258	25.2908	23.8853	24.0868	24.5818	24.4446	24.7613	24.7393	24.9578	25.7285	NA	24.9741	24.6333	24.4929	24.5877
Q9CQV8	135	Ywhab	1	25.041	24.4913	24.5752	23.6896	NA	NA	25.3474	24.4704	24.5621	25.0428	24.1129	24.346	NA	24.9538	NA	23.4607	24.8817	24.98	24.5809	23.421	25.0444	24.1244	25.0685	24.4299	25.006	23.9431	25.1678	24.8008	24.8937	25.0771	23.5123	24.3461	24.3451	23.783	24.1335	24.7671	25.1183	24.9763	25.083	24.3903	25.0827	NA	25.3934	24.7849	25.0318	25.4737
P62259	408	Ywhae	1	27.1946	25.2905	25.8516	25.46	NA	NA	25.7876	25.5283	26.2593	25.4254	25.5054	25.9444	25.2663	25.6495	25.8092	25.3076	25.8896	25.7968	25.7456	25.8136	25.3763	25.2262	25.4616	26.8314	25.1659	25.4544	25.8497	25.3292	25.891	25.7476	25.3033	24.8919	26.3359	25.3739	25.7119	26.0764	25.4805	25.7432	26.0859	25.8487	25.6391	27.3994	25.9675	25.6008	26.1328	26.0429
P61982	198	Ywhag	1	25.2873	23.3989	23.4161	23.6855	23.7386	NA	23.5059	23.5437	24.4243	24.3037	23.6839	24.0403	24.8107	24.9621	24.1797	24.2763	24.2354	24.215	23.9672	23.5257	23.8868	22.9143	23.4932	24.3911	23.9993	23.7027	23.7761	23.8648	24.1159	22.9685	23.4299	23.9553	24.3784	23.7348	23.3377	24.0305	23.4816	24.1078	24.4087	24.5234	23.2299	24.8161	24.0787	24.1853	24.4167	24.4713
P68510	80	Ywhah	1	23.3222	23.6806	23.456	23.8601	NA	NA	24.2414	23.8453	23.4299	24.3469	22.5525	23.0262	24.8132	23.5922	23.4111	23.1332	22.8971	23.5419	23.1452	23.0181	23.6596	23.647	NA	NA	23.4695	23.456	23.0185	23.1773	22.7741	23.2384	22.8062	NA	23.887	23.5622	23.2443	22.9566	22.7252	22.4223	23.1583	23.4814	NA	23.5576	23.8667	23.1351	22.7588	22.6508
P68254	134	Ywhaq	1	24.9202	24.4686	24.0667	24.205	NA	NA	25.2594	22.6601	23.9781	23.7174	23.2977	24.2683	NA	NA	NA	23.4569	23.5142	23.2323	23.608	25.1068	23.1509	24.0795	24.496	NA	23.3901	23.8011	23.7518	24.0112	23.5671	24.7504	23.4324	NA	24.7633	23.8614	24.1953	23.4281	24.6544	24.9166	23.9858	23.146	NA	24.7096	24.3246	24.2033	24.0121	24.2832
P63101	230	Ywhaz	1	26.7337	25.6163	25.6548	25.6596	NA	NA	25.9982	25.5311	25.3423	25.3915	25.4333	25.2469	25.7311	25.4829	NA	25.0475	24.7699	25.7189	24.9924	26.3339	25.7398	25.3317	25.6227	27.6389	25.3142	25.6757	25.7425	25.5432	25.2473	26.2963	26.1342	26.8096	NA	26.3016	26.0593	26.1927	25.9406	24.9575	25.5317	25.5922	25.5678	25.3346	24.9267	25.4011	25.5723	25.5701
Q62523	113	Zyx	1	23.4727	23.7808	22.8024	22.7685	NA	NA	22.6968	23.4711	23.4165	24.7951	25.4866	24.5258	23.743	24.0428	NA	23.3644	23.1734	25.2096	24.8007	23.8326	23.4244	23.2063	23.9843	23.4441	24.582	23.9289	25.2653	24.6931	24.8882	24.2235	23.8481	NA	NA	23.5861	23.5798	24.8829	25.1851	24.6546	22.968	23.5103	NA	NA	23.4967	23.9383	24.9047	25.4448
Q9D2R0	15	Aacs	1	19.1045	18.7404	18.8117	19.7566	NA	NA	NA	18.8071	19.706	19.4268	NA	NA	NA	NA	NA	NA	NA	NA	NA	NA	18.401	18.1148	19.507	NA	20.6144	19.0664	19.1837	18.9948	NA	NA	NA	NA	NA	NA	NA	NA	NA	NA	NA	NA	NA	NA	NA	NA	NA	NA
Q8BWT1	23	Acaa2	1	19.6542	NA	NA	NA	NA	NA	NA	NA	NA	NA	19.5077	19.9926	NA	20.6221	NA	20.3187	19.6487	20.0516	20.0593	NA	NA	NA	NA	NA	NA	NA	NA	NA	20.4338	NA	NA	NA	NA	20.5814	20.2726	19.2844	20.3239	NA	19.838	NA	NA	NA	NA	NA	19.8478	19.6814
Q9JIX8	27	Acin1	1	20.2385	20.8839	21.0697	20.8904	NA	NA	20.9284	19.9137	20.6487	21.0305	19.8368	21.025	NA	NA	NA	21.6157	NA	20.5157	21.372	20.4243	NA	20.5766	20.2849	NA	20.3346	20.3883	20.553	19.7361	20.0322	19.982	19.9274	20.8498	NA	19.8887	20.6074	20.1579	20.6222	20.8112	21.3092	20.7877	NA	NA	NA	20.2579	20.8691	20.5552
Q9R0X4	11	Acot9	1	19.0246	20.5077	19.1191	19.6719	NA	NA	NA	19.8846	19.8224	NA	19.8641	19.3288	NA	19.9287	NA	20.8144	20.7331	20.5518	19.1838	NA	NA	NA	NA	NA	NA	NA	NA	NA	NA	NA	NA	NA	NA	NA	NA	NA	NA	NA	NA	NA	NA	NA	NA	NA	NA	NA
Q9D358	22	Acp1	1	21.0274	20.9891	20.7694	20.9532	NA	NA	NA	21.1545	20.8172	20.1126	21.2566	NA	NA	NA	NA	21.2895	NA	21.7307	NA	20.5766	20.0152	20.656	NA	NA	21.3852	20.5208	20.874	20.8014	20.5045	21.0486	21.2086	NA	NA	21.3416	20.3279	20.7579	20.4327	22.4127	21.0473	22.2664	21.7581	NA	NA	22.1698	21.3589	21.2711
P56376	17	Acyp1	1	19.3012	NA	NA	NA	NA	NA	NA	NA	NA	21.299	NA	NA	NA	NA	NA	NA	NA	NA	NA	NA	NA	NA	NA	NA	NA	NA	NA	NA	19.5857	19.8528	20.2013	20.2089	NA	19.973	20.2729	19.0885	19.4375	NA	19.7149	20.7262	NA	19.9027	20.6098	20.8472	19.198	NA
Q8BK64	20	Ahsa1	1	19.4275	20.6673	20.2045	NA	NA	NA	NA	NA	20.9706	NA	18.207	18.5653	NA	NA	NA	18.6345	19.254	19.118	19.1424	NA	NA	18.8701	NA	NA	NA	19.7363	19.0832	19.6076	19.8924	19.985	NA	NA	NA	NA	NA	NA	NA	19.1963	20.0227	18.975	NA	NA	19.4795	19.9812	19.3354	18.7142
P29699	10	Ahsg	0.9997	20.4406	NA	NA	NA	NA	NA	NA	NA	NA	NA	NA	NA	NA	NA	NA	NA	NA	NA	NA	NA	NA	19.8504	NA	NA	NA	20.094	19.7754	NA	NA	18.9893	NA	NA	NA	NA	19.3312	17.9728	18.9413	18.6638	19.2036	NA	NA	NA	18.9096	19.0684	18.8224	NA
O08915	13	Aip	1	19.9912	20.7054	19.8206	20.3284	NA	NA	20.7655	20.9709	20.1418	20.9555	20.3263	20.3003	NA	NA	NA	NA	NA	21.4536	20.5575	NA	NA	NA	NA	NA	NA	20.7017	20.4822	NA	20.2617	20.6137	21.7257	20.8396	20.7436	20.8372	20.4109	20.4018	20.5272	NA	NA	NA	NA	NA	NA	NA	NA	NA
Q9WTQ5	27	Akap12	1	19.8377	NA	NA	NA	NA	NA	NA	NA	NA	NA	20.9683	22.0706	19.8098	19.8964	NA	21.7951	20.4476	21.1673	19.7617	NA	NA	NA	NA	NA	NA	NA	NA	NA	19.9247	22.307	21.9582	NA	20.0671	21.0273	21.4692	20.8964	20.6783	20.2852	20.385	20.2375	19.7833	NA	20.2478	19.4992	19.9581	20.9817
Q8K009	36	Aldh1l2	1	21.0043	20.6554	20.719	21.5634	NA	NA	NA	21.1277	20.4326	20.9485	22.0505	21.0155	NA	NA	NA	NA	NA	NA	NA	22.0878	21.6291	21.1099	22.0408	21.8302	22.1082	21.9458	20.847	21.591	21.3919	21.5996	23.1251	22.2792	22.3918	22.7869	21.8703	21.6844	22.0971	NA	21.5536	NA	NA	NA	21.4444	NA	20.6109	NA
P47740	13	Aldh3a2	1	18.0541	NA	NA	NA	NA	NA	NA	NA	NA	NA	18.5106	NA	NA	NA	NA	19.1826	NA	18.4201	NA	NA	NA	NA	NA	NA	NA	NA	NA	NA	NA	NA	NA	NA	NA	NA	18.437	19.1004	NA	NA	18.0273	17.7151	NA	NA	18.3476	NA	17.4832	17.7547
P97822	24	Anp32e	1	21.2529	21.0379	20.9056	20.1907	NA	NA	20.9047	20.8025	21.3741	NA	NA	NA	NA	NA	NA	NA	NA	NA	NA	NA	20.0653	20.1844	20.7682	NA	NA	20.1086	20.2612	NA	20.3932	20.0947	19.6667	NA	NA	20.2373	20.4493	21.0388	20.4371	NA	NA	21.1487	NA	NA	21.3217	20.3524	20.1483	20.0153
O35640	45	Anxa8	1	21.342	NA	20.9146	21.2978	NA	NA	21.3196	20.6065	22.2468	22.0391	20.3814	20.7031	21.2838	21.4685	NA	21.0169	20.9191	20.4565	20.9377	NA	20.8362	21.5546	21.4058	NA	21.2198	21.0318	20.7416	20.4277	21.5653	21.801	NA	NA	NA	21.481	21.3277	20.9768	21.0798	NA	21.3111	21.8998	NA	NA	21.8417	22.2219	21.754	21.0811
P17426	21	Ap2a1	1	19.6006	NA	20.1009	NA	NA	NA	20.2491	21.0103	20.1399	20.5569	NA	NA	NA	NA	NA	NA	NA	NA	NA	NA	NA	NA	NA	NA	NA	NA	NA	NA	NA	NA	NA	NA	NA	21.7403	NA	NA	21.2552	20.4216	19.8444	20.6244	NA	NA	NA	20.9744	19.5239	19.7652
Q9D7N9	13	Apmap	1	20.5668	NA	NA	NA	NA	NA	NA	NA	NA	NA	18.6967	19.1132	NA	18.8452	NA	18.5977	19.3763	19.1945	18.6977	19.8443	20.0408	20.548	NA	NA	20.4274	18.9845	19.9864	20.0763	20.0517	19.3988	19.0622	NA	NA	NA	19.2987	19.8821	20.2554	18.395	19.0798	19.5738	NA	NA	19.1358	19.806	20.309	19.757
G5E8V9	40	Arfip1	1	20.7649	21.8484	21.2968	21.8861	NA	NA	NA	22.0741	21.469	22.2035	22.684	21.6328	22.9729	NA	NA	21.8984	23.3531	NA	21.5698	21.9427	21.0336	21.5613	NA	NA	21.7661	21.5875	21.2463	21.6569	22.5828	22.0028	23.5598	NA	NA	21.6667	21.9789	22.0086	21.3815	22.1871	NA	NA	NA	NA	NA	NA	20.3696	NA
P61211	36	Arl1	1	19.8701	20.8139	19.6138	19.5931	NA	NA	20.9236	21.2092	19.9981	19.7648	20.6902	20.4186	20.5991	NA	20.6335	20.6135	20.6654	20.7857	20.3498	20.7465	20.4427	20.7179	21.1064	NA	20.5506	20.54	20.4833	19.5316	20.2177	19.6545	20.1965	21.7547	NA	20.2353	20.4139	20.1123	20.5598	20.0734	20.384	19.6983	20.8685	20.8263	20.8609	20.0355	19.8734	20.4852
Q9WUL7	24	Arl3	1	20.5966	21.1478	20.6146	20.9016	NA	NA	20.7705	21.5723	21.0946	21.1829	21.6588	NA	NA	22.244	NA	NA	NA	NA	NA	21.3157	21.0971	20.2009	NA	NA	20.6735	20.8415	21.3494	21.3567	NA	NA	NA	NA	NA	21.9362	NA	21.5892	21.0368	21.1335	NA	20.8266	NA	21.5379	21.1257	NA	20.4453	NA
Q9CQW2	18	Arl8b	1	20.8238	20.0658	NA	19.5095	NA	NA	20.1436	NA	19.5248	19.524	19.9525	19.7464	NA	NA	20.4379	NA	NA	19.0184	19.2881	19.9025	19.3201	NA	NA	NA	19.6428	18.8382	18.7499	NA	19.6934	18.9939	NA	NA	NA	19.0084	19.1604	19.4131	18.6285	20.6815	21.2341	NA	NA	NA	NA	19.7423	19.8274	19.4746
Q8BSY0	46	Asph	1	21.2162	22.0819	21.476	21.8683	NA	NA	21.8835	22.1379	21.516	21.5166	22.4809	21.831	22.6856	NA	NA	23.4095	NA	23.3042	22.2896	NA	NA	NA	NA	NA	20.813	21.1399	21.2048	NA	21.9151	21.0706	NA	NA	NA	20.4078	21.1744	21.8326	22.0985	NA	21.629	21.2428	NA	NA	21.6452	21.1087	21.667	21.3977
O08997	30	Atox1	1	21.1929	20.6775	19.6817	21.152	NA	NA	NA	NA	20.1023	20.3936	21.3318	20.5894	22.7275	NA	21.9324	21.6795	21.7885	21.6739	20.7775	21.6968	21.4565	21.1446	NA	NA	21.545	20.5111	20.7507	21.5755	20.7882	21.2815	NA	22.1603	NA	NA	21.4758	21.1862	20.5393	22.7059	22.7157	22.3511	NA	NA	NA	22.5138	21.4754	21.6804
P97370	21	Atp1b3	1	20.2735	NA	NA	NA	NA	NA	NA	NA	NA	NA	21.316	NA	NA	NA	NA	NA	NA	20.7718	NA	19.9361	20.8882	21.108	20.9479	NA	20.916	21.0449	19.6406	20.2186	20.5436	20.3776	21.6049	NA	21.2104	20.925	21.3794	19.9551	20.0678	20.6646	21.1459	21.4919	NA	21.242	21.5109	20.9466	20.5353	20.1458
Q6Q477	21	Atp2b4	1	20.0847	NA	NA	NA	NA	NA	NA	NA	NA	NA	20.2994	NA	NA	NA	NA	20.1838	20.2289	20.3099	20.5178	NA	NA	NA	NA	NA	21.4595	22.4154	20.2197	NA	NA	NA	20.9249	NA	NA	NA	20.5038	NA	NA	19.6035	20.1524	20.8642	NA	NA	20.2341	20.62	19.8006	19.7105
Q9CPQ8	23	Atp5mg	1	21.7574	22.2268	21.79	21.5039	NA	NA	21.961	21.5479	22.3427	21.986	23.0115	23.1751	NA	22.257	NA	23.4359	22.4416	22.9328	23.6053	NA	NA	NA	NA	NA	NA	NA	NA	NA	NA	NA	NA	NA	NA	NA	NA	NA	NA	21.5835	22.0332	22.4866	21.6351	NA	21.6338	21.6457	22.2086	21.8405
Q78IK2	17	Atp5mk	1	21.4635	20.3771	21.4635	21.776	NA	NA	20.6344	20.6621	20.9177	21.4497	21.2554	20.1559	NA	21.1116	NA	21.4879	21.464	21.4829	21.771	21.3608	21.2014	21.4336	20.9933	NA	20.6169	20.4886	21.0303	21.5051	22.2345	21.2412	20.966	21.7011	NA	NA	20.8674	21.6642	21.2812	21.74	21.2887	20.1935	NA	NA	20.8117	21.3847	21.3463	21.1477
Q9R1Q9	11	Atp6ap1	1	20.1141	20.0011	19.9288	20.3678	NA	NA	NA	20.4765	NA	NA	NA	NA	NA	NA	NA	NA	NA	NA	NA	NA	20.122	20.297	NA	NA	NA	20.1325	20.68	20.1861	19.9969	NA	NA	NA	NA	19.7589	20.2666	19.5367	19.0404	19.9536	NA	20.7487	NA	NA	NA	NA	19.5755	19.7498
Q9Z1G3	24	Atp6v1c1	1	19.8573	22.275	NA	NA	NA	NA	NA	NA	20.5804	NA	20.7428	20.7404	NA	NA	NA	21.9705	NA	21.609	NA	NA	21.4241	21.0615	NA	NA	21.1257	19.9308	20.4704	21.5496	NA	NA	NA	NA	NA	NA	NA	NA	NA	20.9354	20.5474	20.4825	NA	NA	20.626	20.536	20.382	20.4372
Q9CR51	25	Atp6v1g1	1	21.2847	NA	NA	NA	NA	NA	NA	NA	NA	NA	20.4095	20.6757	NA	NA	NA	NA	20.4771	19.4366	19.4659	NA	20.4405	21.0956	20.7521	NA	21.0441	20.8702	19.8516	20.0049	19.1389	20.0416	20.2325	NA	NA	20.7796	21.184	20.1551	20.1064	20.293	20.8419	20.7278	NA	NA	21.6099	21.6461	20.5705	20.6577
Q91YN9	27	Bag2	1	19.7231	20.0126	19.5263	19.5866	NA	NA	19.8874	20.0163	19.8844	20.4714	21.0984	19.2242	NA	NA	NA	20.6017	19.2637	20.6111	21.0792	20.2049	20.5381	20.0942	NA	NA	21.2201	19.6903	21.1198	20.5829	20.5295	NA	21.0939	NA	NA	22.2942	19.7781	20.7016	20.8409	20.695	20.4791	20.6048	20.0215	19.9152	20.7248	20.5995	21.1006	20.5785
Q9JLV1	20	Bag3	1	19.5523	NA	NA	19.4186	NA	NA	NA	NA	NA	NA	NA	NA	NA	NA	NA	NA	NA	NA	NA	NA	19.4487	19.9772	19.9696	NA	17.774	18.5118	19.6432	19.4914	NA	NA	NA	NA	NA	NA	NA	NA	NA	NA	NA	NA	NA	NA	NA	NA	NA	NA
Q9Z1R2	23	Bag6	1	20.2161	21.0532	20.5447	19.9079	NA	NA	NA	20.3061	20.4562	19.6409	20.3568	20.2516	NA	20.5746	20.247	20.358	19.529	20.5607	20.2613	NA	19.7308	19.8921	20.8353	NA	NA	20.0531	20.7377	19.9162	18.9615	20.0024	20.2842	NA	NA	19.8907	19.3895	20.6437	19.8445	18.928	18.6139	19.9069	NA	20.3595	18.8697	20.0812	20.6619	20.1388
P59017	31	Bcl2l13	1	20.4375	NA	20.8009	20.8802	NA	NA	20.9789	20.8946	20.4523	20.5259	NA	21.4619	NA	NA	NA	20.3168	20.5397	NA	NA	NA	NA	NA	NA	NA	20.8941	20.2929	20.1748	20.4435	20.7555	20.6398	22.0538	NA	NA	20.5152	18.9975	20.1869	20.2687	19.758	20.4103	20.0722	NA	NA	21.2131	NA	19.705	20.423
P70444	12	Bid	1	19.3174	18.6808	18.464	19.3184	NA	NA	19.5814	NA	19.1203	19.2701	NA	20.2575	NA	NA	NA	20.7033	NA	20.4402	19.4361	NA	NA	NA	NA	NA	NA	NA	NA	NA	19.1494	NA	NA	NA	NA	19.1495	NA	19.3133	19.1007	19.4873	NA	18.7182	NA	NA	19.3525	NA	18.9087	18.7223
Q8R016	12	Blmh	1	18.9325	NA	NA	NA	NA	NA	NA	NA	NA	NA	NA	NA	NA	NA	NA	NA	NA	NA	NA	NA	NA	18.7997	NA	NA	NA	20.4413	19.1605	18.9062	NA	NA	NA	NA	NA	NA	NA	NA	NA	NA	NA	NA	NA	NA	NA	NA	NA	NA
Q8R164	9	Bphl	0.997	19.437	19.888	NA	19.1397	NA	NA	NA	NA	18.7629	19.6628	NA	NA	NA	NA	NA	NA	NA	NA	NA	20.7337	20.3926	21.1733	NA	20.7212	21.0809	20.2971	20.3963	21.1138	NA	NA	NA	NA	NA	NA	NA	NA	NA	NA	NA	NA	NA	NA	NA	NA	NA	NA
Q64152	39	Btf3	1	21.8042	21.7417	21.7052	20.9838	NA	NA	21.6462	21.4379	22.3984	21.4408	NA	NA	NA	NA	NA	NA	NA	NA	NA	NA	22.0352	22.4775	21.5823	NA	22.2016	21.9357	22.563	23.0994	NA	NA	NA	NA	NA	NA	NA	NA	NA	21.4109	21.5205	22.6475	23.8778	20.9265	21.4288	21.6287	22.6876	22.3468
Q9CQC6	18	Bzw1	1	20.0345	NA	NA	NA	NA	NA	NA	NA	NA	NA	NA	NA	NA	NA	NA	NA	NA	NA	NA	NA	NA	NA	NA	NA	NA	NA	NA	NA	NA	NA	NA	NA	NA	NA	NA	NA	NA	20.6629	18.8494	20.1821	NA	NA	20.2685	19.6004	19.8808	19.6873
P01027	15	C3	1	20.5404	NA	NA	NA	NA	NA	NA	NA	NA	NA	NA	NA	NA	NA	NA	NA	NA	NA	NA	NA	NA	NA	NA	NA	NA	NA	NA	NA	NA	NA	NA	NA	NA	NA	NA	20.8679	NA	NA	NA	NA	NA	NA	NA	NA	NA	NA
Q6PHZ2	11	Camk2d	1	19.6878	NA	NA	NA	NA	NA	NA	NA	NA	NA	20.0774	20.1594	NA	NA	NA	20.2632	19.8355	20.3179	20.1595	NA	NA	NA	NA	NA	NA	NA	NA	NA	20.1201	19.6584	NA	NA	NA	20.4057	20.2522	19.7031	20.5099	NA	NA	NA	NA	NA	NA	NA	NA	NA
Q9CR86	11	Carhsp1	0.9995	18.1868	NA	NA	NA	NA	NA	NA	NA	NA	NA	NA	NA	NA	NA	NA	NA	NA	NA	NA	NA	17.1898	17.8342	18.4989	19.0348	NA	17.7832	17.1306	17.433	NA	NA	NA	NA	NA	NA	NA	NA	NA	17.3762	17.1504	16.8293	18.75	19.4579	17.5114	18.3157	17.5336	17.5157
Q9ER72	26	Cars1	1	20.0808	20.9827	19.8268	20.8786	NA	NA	20.7189	21.2171	20.9896	19.7616	NA	NA	NA	NA	NA	NA	NA	NA	NA	NA	20.4386	NA	NA	NA	NA	20.0553	19.7828	NA	20.1817	20.4009	20.4563	NA	NA	20.3633	19.9109	20.8454	20.1353	NA	NA	NA	NA	NA	NA	NA	NA	NA
P70677	29	Casp3	1	20.6983	23.9236	23.0915	21.0858	NA	22.0725	21.2346	NA	20.6557	NA	21.1888	22.0145	21.4581	20.9685	NA	20.8636	20.0355	20.9403	20.1259	20.3287	20.0586	NA	NA	NA	20.3357	20.6401	19.9592	19.8267	21.3791	19.7637	20.727	NA	NA	NA	20.7168	19.9857	20.1529	NA	NA	NA	NA	NA	NA	NA	NA	NA
P51125	30	Cast	1	21.4424	22.7298	22.4663	22.6058	NA	NA	22.3565	22.3613	22.6557	22.5179	NA	NA	NA	NA	NA	NA	NA	NA	NA	NA	21.351	22.2891	22.2023	22.1621	21.7047	22.4987	22.2447	21.4089	NA	22.7462	NA	NA	NA	NA	22.7665	21.9907	21.6854	22.347	22.4036	21.7363	NA	NA	22.498	22.212	21.8155	22.7414
P24270	31	Cat	1	20.4607	NA	NA	NA	NA	NA	NA	NA	NA	NA	21.0206	20.9668	NA	21.2098	NA	21.0209	NA	19.8757	20.5974	NA	NA	NA	NA	NA	NA	NA	NA	NA	NA	NA	NA	NA	NA	NA	NA	NA	NA	20.4589	20.6835	19.9426	NA	NA	20.6641	20.6792	20.4281	20.5186
Q9D024	23	Ccdc47	1	20.725	20.6092	20.4072	20.8811	NA	NA	20.2803	20.3813	20.5172	20.4354	NA	NA	NA	NA	NA	NA	NA	NA	NA	19.9598	20.8541	20.8562	20.4263	20.8101	20.6251	20.9924	20.3905	20.8424	20.7797	20.1985	19.9285	20.2529	NA	20.1431	20.5164	20.1607	20.7496	21.3982	21.1044	20.7878	20.9057	NA	20.9226	20.1793	20.8506	20.7039
P40240	23	Cd9	1	21.0327	19.9809	NA	20.6404	NA	NA	NA	20.0029	20.9768	NA	NA	NA	NA	NA	NA	NA	NA	NA	NA	20.0699	18.9191	21.2154	NA	NA	21.0009	20.0153	20.4747	20.2139	20.8284	20.4073	21.542	NA	NA	20.8817	20.105	20.5991	20.3476	19.5067	NA	NA	NA	NA	20.4091	NA	20.0945	19.7599
Q6A068	13	Cdc5l	1	18.8738	17.4237	18.1507	18.504	NA	NA	18.3534	18.0846	18.1685	18.4737	18.8494	NA	NA	NA	NA	NA	NA	NA	19.6926	NA	NA	NA	NA	NA	NA	NA	NA	NA	18.8708	18.982	18.0975	NA	NA	18.3011	18.5226	18.8254	18.1194	18.6371	19.5406	19.8292	NA	19.2476	NA	18.5309	17.8592	18.7618
P30285	13	Cdk4	1	19.5511	19.7692	20.277	20.4034	NA	NA	NA	20.38	20.4462	19.9428	NA	19.8307	NA	NA	NA	19.6549	19.7522	19.1436	20.5199	NA	NA	20.8268	NA	NA	NA	19.6637	20.126	20.2778	20.0722	19.1979	20.3009	NA	NA	20.4008	19.6262	19.8038	19.4177	19.1644	19.4721	19.9315	NA	NA	19.9682	20.2343	19.9667	19.6755
Q924Z4	12	Cers2	1	19.3493	21.7964	21.4624	NA	NA	NA	22.0125	22.4791	NA	NA	20.0185	20.5258	19.9493	19.9603	19.6163	20.7535	20.7008	20.5048	20.2198	NA	NA	NA	NA	NA	NA	NA	NA	NA	NA	NA	NA	NA	NA	NA	NA	NA	NA	20.4269	20.828	19.7081	19.5754	19.558	20.5877	20.3162	20.2094	20.3479
O88271	9	Cfdp1	1	17.8305	NA	NA	NA	NA	NA	NA	NA	NA	NA	18.6497	18.4935	NA	18.2917	NA	18.4048	18.1684	18.2584	18.7714	NA	NA	NA	NA	NA	NA	NA	NA	NA	17.6002	18.5404	17.9998	NA	NA	17.3628	18.2495	18.2385	18.0849	18.0533	18.3005	17.2225	17.9744	NA	17.9467	17.1249	18.5852	18.3196
Q6PDQ2	31	Chd4	1	19.9999	NA	NA	NA	NA	NA	NA	NA	NA	NA	20.3267	20.2985	21.3754	21.0404	20.4035	20.1794	20.5607	20.3676	19.4102	NA	NA	NA	NA	NA	NA	NA	NA	NA	21.0874	20.4006	21.6022	NA	21.4956	20.6168	21.219	20.7819	20.4396	20.9595	20.1885	21.9083	NA	21.249	19.1326	20.356	20.663	19.9354
P61025	21	Cks1b	0.9999	19.3858	18.4636	19.7137	NA	NA	NA	NA	19.0422	19.5826	19.3557	NA	NA	NA	NA	NA	NA	NA	NA	NA	NA	NA	NA	NA	NA	NA	NA	NA	NA	18.7614	20.6225	20.1549	NA	NA	19.4813	19.3394	19.4982	NA	NA	NA	NA	NA	NA	NA	NA	NA	NA
Q99KN9	12	Clint1	1	18.4511	NA	19.1221	NA	NA	NA	NA	18.4146	18.4536	NA	NA	NA	NA	NA	NA	NA	19.3412	18.5545	NA	NA	NA	NA	NA	NA	NA	NA	NA	NA	18.7417	18.4353	19.2695	NA	18.3172	17.9075	18.4071	18.8969	18.4108	19.1033	18.3028	18.9062	NA	NA	17.6303	18.3168	18.969	18.4937
Q9D1A2	16	Cndp2	1	19.4556	18.4283	18.3899	NA	NA	NA	19.3242	18.1006	18.6082	18.7544	NA	NA	NA	NA	NA	NA	NA	NA	NA	NA	NA	NA	NA	NA	NA	NA	NA	NA	NA	NA	NA	NA	NA	NA	NA	NA	NA	NA	NA	20.3049	NA	NA	NA	20.2593	19.7578	19.8267
Q60847	19	Col12a1	1	19.2779	19.6842	19.6876	19.978	NA	19.7673	19.6473	19.901	19.4938	20.1871	NA	NA	NA	NA	NA	NA	NA	NA	NA	20.6164	18.7935	20.3684	NA	NA	19.8901	19.7595	20.2147	20.1932	NA	NA	NA	NA	NA	NA	NA	NA	NA	NA	NA	NA	NA	NA	NA	NA	NA	NA
P28481	13	Col2a1	0.9999	18.2147	NA	18.8913	19.2098	NA	NA	19.4799	NA	18.681	NA	18.0665	18.667	NA	NA	NA	19.178	18.993	18.6701	NA	NA	NA	NA	NA	NA	NA	NA	NA	NA	19.1487	NA	NA	NA	NA	NA	19.0609	19.5018	19.2249	NA	NA	NA	NA	NA	NA	NA	NA	NA
P08121	31	Col3a1	1	21.2391	21.7914	21.1503	21.9624	NA	NA	20.854	22.1024	21.6397	22.2058	23.9453	20.8851	21.481	22.6716	21.3218	21.9106	20.9275	21.8805	21.5075	21.9128	21.6804	21.2574	22.0164	22.2601	21.4558	22.2337	22.4382	22.1354	23.1435	22.0007	22.1702	22.4581	21.8433	22.7251	22.036	22.8717	22.8243	NA	NA	NA	NA	NA	NA	NA	NA	NA
Q04857	25	Col6a1	1	20.4011	20.6673	21.578	NA	NA	NA	NA	20.768	NA	NA	20.8482	19.9488	20.0033	20.5563	NA	20.1867	20.3398	20.3259	19.508	NA	NA	21.4971	NA	NA	NA	NA	NA	NA	NA	NA	NA	NA	NA	NA	NA	NA	NA	20.8011	NA	NA	NA	NA	NA	NA	20.6471	NA
Q8K297	23	Colgalt1	1	19.9647	NA	NA	NA	NA	NA	NA	NA	NA	NA	NA	NA	NA	NA	NA	NA	NA	NA	NA	NA	NA	NA	NA	NA	NA	NA	NA	NA	20.2613	19.8154	20.7639	NA	NA	20.6074	NA	19.9101	19.9291	20.8399	19.5573	19.2144	NA	NA	NA	20.397	19.739	NA
O89079	27	Cope	1	20.7857	NA	NA	20.25	NA	NA	NA	21.1325	20.9098	20.6297	NA	NA	NA	NA	NA	NA	NA	20.6669	21.1625	NA	21.0085	21.266	NA	20.8393	20.3562	20.8078	20.655	21.148	NA	20.7639	22.0013	NA	NA	NA	21.9667	20.8806	21.0728	20.495	20.4386	20.1839	NA	21.4748	21.6427	21.9779	20.8745	21.4356
O35864	10	Cops5	1	19.0462	NA	NA	NA	NA	NA	NA	NA	NA	NA	NA	NA	NA	NA	NA	NA	NA	NA	NA	NA	NA	NA	NA	NA	NA	NA	NA	NA	NA	NA	NA	NA	NA	NA	NA	NA	NA	NA	NA	NA	NA	NA	NA	NA	NA	NA
Q9CZ04	24	Cops7a	1	20.1419	21.6105	21.6805	22.4958	NA	NA	22.0481	22.6047	21.5015	21.8797	20.1985	19.3244	20.6502	22.532	NA	21.5162	NA	21.1287	20.5996	21.7305	20.6776	NA	21.5666	NA	21.6348	22.1642	20.6503	20.3554	21.4779	20.4256	20.0242	21.1673	21.1962	20.2758	19.2954	19.884	20.0007	20.2269	20.6968	20.3276	21.2447	20.6505	20.9107	20.2501	20.0487	20.0591
P61924	26	Copz1	1	21.2008	NA	NA	NA	NA	NA	NA	NA	NA	NA	NA	NA	NA	NA	NA	21.5398	NA	NA	NA	NA	NA	20.775	21.1106	NA	20.7755	21.3108	21.2231	21.36	21.3813	20.3402	20.9515	NA	NA	21.3341	19.9329	21.6186	21.4753	21.4655	NA	21.5129	NA	NA	NA	NA	20.5868	21.7629
Q9CQI6	33	Cotl1	1	21.7514	23.8344	24.0469	22.5768	NA	NA	23.2427	23.6337	23.3558	NA	22.4048	22.9153	NA	NA	NA	23.4126	23.2413	NA	22.6617	22.2325	23.8264	23.6625	23.8828	NA	22.2662	23.5603	22.8606	21.7842	22.3379	22.5459	23.078	22.9275	NA	22.8239	22.5709	21.7135	22.3634	22.8377	23.8851	24.2506	23.4849	22.854	24.1589	23.5229	22.904	22.3626
Q8BH51	17	Cox14	1	19.1417	19.1007	19.544	19.6067	NA	NA	19.3824	18.8109	19.3484	18.5021	19.2467	19.7321	19.0105	NA	NA	19.7386	19.4553	18.9493	19.5537	18.8929	19.8659	18.9172	18.699	19.2449	19.1247	19.1673	19.8796	19.781	NA	NA	NA	NA	NA	NA	NA	NA	NA	19.8398	20.432	20.0774	NA	NA	19.8106	19.3174	20.5676	20.2544
P19783	29	Cox4i1	1	22.8235	21.3009	NA	NA	NA	NA	22.1242	NA	21.3652	20.8663	21.4695	21.3107	NA	NA	NA	21.2561	NA	20.8804	NA	NA	NA	NA	NA	NA	NA	NA	21.1195	22.1298	21.2146	20.7315	21.9686	23.014	NA	NA	21.7664	21.1195	21.8778	NA	21.7224	21.1806	NA	NA	NA	22.5049	21.923	21.682
P43024	10	Cox6a1	1	20.7255	20.879	21.6797	21.1665	NA	NA	21.2065	20.6426	21.0666	21.5214	NA	NA	NA	NA	NA	NA	NA	NA	NA	NA	NA	NA	NA	NA	NA	NA	NA	NA	22.0815	21.4977	20.6563	NA	20.8758	21.23	21.7147	22.4354	22.5866	NA	NA	NA	NA	NA	NA	NA	NA	NA
Q9CPQ1	24	Cox6c	1	21.5236	NA	NA	NA	NA	NA	NA	NA	NA	NA	NA	NA	NA	NA	NA	NA	NA	NA	NA	21.8734	21.8046	21.9639	21.7312	NA	21.8412	21.5557	21.4379	21.776	NA	NA	NA	NA	NA	NA	NA	NA	NA	NA	NA	NA	NA	NA	NA	NA	NA	NA
Q8C166	13	Cpne1	1	19.9548	19.4923	19.088	19.305	NA	NA	18.6935	19.7831	19.8122	18.7446	18.9514	18.3206	NA	19.0216	NA	19.2666	19.354	19.0426	18.288	NA	19.3386	20.0171	19.2427	NA	19.7628	19.7299	19.577	19.8295	NA	NA	NA	NA	NA	NA	NA	NA	NA	NA	NA	NA	NA	NA	NA	NA	NA	NA
P36552	21	Cpox	1	20.5599	NA	NA	NA	NA	NA	NA	NA	NA	NA	20.8596	20.823	NA	21.5822	NA	20.6639	20.8706	21.6237	21.5867	21.1244	20.5929	21.0876	NA	NA	20.693	22.9581	20.3412	21.0117	20.9015	19.9134	19.7244	20.8238	NA	20.8991	20.6815	20.7631	21.1472	NA	NA	NA	NA	NA	NA	NA	NA	NA
Q91WE4	8	CR032	0.998	17.9525	17.9956	18.6519	18.1734	NA	NA	NA	NA	19.0291	18.5268	NA	NA	NA	NA	NA	NA	NA	NA	NA	NA	NA	NA	NA	NA	NA	NA	NA	NA	18.8318	17.2634	18.5643	NA	NA	18.4646	17.333	19.1313	18.8844	NA	NA	NA	NA	NA	NA	NA	NA	NA
Q9CYA0	19	Creld2	1	19.8211	NA	NA	NA	NA	NA	NA	NA	19.6858	20.4564	NA	NA	NA	NA	NA	NA	NA	NA	NA	NA	NA	NA	NA	NA	NA	20.0174	NA	NA	20.2852	NA	20.8529	NA	20.3797	19.9968	19.9582	20.7473	20.0797	NA	NA	NA	NA	NA	NA	NA	NA	NA
P63254	11	Crip1	1	20.9595	21.5366	20.1394	19.4752	NA	NA	19.8716	20.1689	21.5364	22.1225	NA	NA	NA	NA	NA	NA	NA	NA	NA	20.5367	19.8298	19.6193	21.503	NA	19.5475	20.4649	20.8843	21.8259	NA	NA	NA	NA	NA	NA	NA	NA	NA	NA	NA	NA	NA	NA	NA	NA	NA	NA
Q9DCT8	12	Crip2	1	20.5103	NA	NA	NA	NA	NA	NA	NA	NA	NA	20.4985	21.3412	20.7325	20.7846	NA	20.4865	20.6322	20.6638	20.4828	NA	20.4033	21.0498	20.026	20.0156	20.5428	20.2523	18.2005	20.1438	19.8944	20.229	19.949	20.249	NA	19.1681	19.9593	20.0142	20.1869	20.6903	18.7732	21.5999	NA	NA	19.1157	19.7253	19.8513	19.7126
P67871	33	Csnk2b	1	21.5534	NA	NA	NA	NA	NA	NA	NA	NA	NA	NA	NA	NA	NA	NA	NA	NA	NA	NA	21.731	NA	22.0908	NA	NA	NA	21.7166	20.9278	20.9475	20.0154	NA	NA	NA	NA	21.6821	21.0471	21.2419	20.4943	21.9919	21.009	20.8451	NA	NA	20.6837	21.5942	20.3504	21.0474
Q02248	39	Ctnnb1	1	20.4213	NA	NA	NA	NA	NA	NA	NA	NA	NA	NA	NA	NA	NA	NA	21.5604	NA	21.0069	NA	NA	21.0319	21.0234	NA	NA	21.1842	21.3156	20.965	20.9689	NA	20.4846	21.5516	NA	NA	21.5662	20.5804	20.6504	NA	20.775	21.3872	20.9414	20.7199	NA	19.9323	20.8731	20.5175	20.8583
Q9CWL8	23	Ctnnbl1	1	19.3139	20.4538	20.4513	20.7166	NA	NA	19.6885	21.0718	20.8524	19.838	18.9536	NA	NA	19.7669	20.3259	19.8007	20.4463	20.5252	19.4953	NA	NA	NA	NA	NA	NA	NA	NA	NA	20.46	19.8858	NA	NA	NA	20.2115	20.5138	19.9464	19.6342	NA	NA	NA	NA	NA	NA	NA	NA	NA
Q9JLV5	13	Cul3	1	18.8129	NA	NA	NA	NA	NA	NA	NA	NA	NA	19.3016	19.7546	NA	19.5226	NA	19.5267	19.4974	20.2462	18.6014	NA	NA	NA	NA	NA	20.3725	19.6486	18.4745	19.5047	NA	NA	NA	NA	NA	NA	NA	NA	NA	NA	NA	NA	NA	NA	NA	NA	NA	NA
A2A432	19	Cul4b	1	19.5608	20.3105	20.1382	20.7823	NA	NA	20.3123	20.4078	19.8633	20.3547	NA	NA	NA	NA	NA	NA	NA	NA	NA	19.9853	20.4855	20.2912	20.3698	NA	20.3623	20.4083	20.496	19.8154	21.1897	NA	21.3692	21.89	NA	NA	NA	NA	20.6457	NA	NA	NA	NA	NA	NA	NA	NA	NA
Q9JHS9	11	Cwc15	0.9998	17.2399	NA	NA	NA	NA	NA	NA	NA	NA	NA	NA	NA	NA	NA	NA	NA	NA	NA	NA	NA	NA	NA	NA	NA	NA	NA	NA	NA	18.7336	18.3197	19.1718	NA	NA	17.9552	18.5158	18.8636	NA	NA	NA	NA	NA	NA	NA	NA	NA	NA
Q9CQX2	17	Cyb5b	1	20.1623	20.0483	20.0151	19.8704	NA	NA	20.0835	19.9493	20.3246	20.3945	20.0737	21.0438	20.318	20.6117	20.3305	20.5648	20.2382	20.916	20.8368	NA	NA	NA	NA	NA	NA	NA	NA	NA	19.3719	20.7503	20.3666	NA	NA	19.7564	20.4214	19.4138	20.5903	NA	NA	NA	NA	NA	NA	NA	NA	NA
Q9DB73	21	Cyb5r1	1	20.5106	21.6271	21.58	21.0629	NA	NA	20.7037	20.6081	21.4142	21.0373	21.1346	21.1085	NA	19.7041	NA	20.3963	20.5201	20.9266	20.4837	21.1976	21.1767	NA	NA	NA	NA	20.4276	20.8386	20.3859	NA	20.3605	20.776	NA	NA	NA	20.419	20.8546	20.8821	20.0837	20.4693	20.3823	NA	NA	21.0034	20.62	20.893	20.9926
Q8BKE6	18	Cyp20a1	1	19.6884	NA	NA	NA	NA	NA	NA	NA	NA	NA	21.1138	20.1506	NA	NA	NA	20.7572	20.7144	20.5881	20.0903	NA	NA	NA	NA	NA	NA	NA	NA	NA	20.3979	21.5263	21.755	NA	NA	21.0955	20.9586	20.9042	20.732	20.2536	NA	20.5042	NA	20.1775	19.9535	20.4412	20.1326	20.5534
P98078	37	Dab2	1	21.0128	NA	21.9146	NA	NA	NA	22.2311	NA	NA	NA	22.0212	22.1267	NA	NA	NA	21.5096	NA	NA	22.2234	NA	NA	NA	NA	NA	NA	24.3925	20.7276	NA	21.3446	21.6648	NA	NA	NA	NA	NA	21.247	NA	22.3183	21.1809	21.6657	NA	NA	NA	NA	20.9085	21.4477
Q9JII5	21	Dazap1	1	20.1431	NA	NA	NA	NA	NA	NA	NA	NA	NA	19.9542	20.4401	NA	NA	NA	19.6442	NA	19.8722	20.4563	NA	19.7596	19.95	21.0948	NA	20.8207	19.9967	20.0848	20.0032	20.4767	20.4046	20.5023	NA	NA	19.8614	19.5267	20.1895	20.797	20.0055	NA	19.4347	NA	NA	19.4453	19.8352	19.2186	20.1593
P31786	51	Dbi	1	23.1308	NA	20.8321	20.7874	NA	NA	NA	NA	21.5787	NA	20.6924	NA	NA	NA	NA	20.4786	20.6467	20.9307	20.8348	NA	NA	21.4669	NA	NA	NA	NA	NA	20.4954	21.4479	NA	22.9806	NA	NA	21.8543	21.6939	21.8795	NA	NA	NA	22.5013	NA	NA	NA	NA	21.663	22.0475
Q8BHC4	29	Dcakd	1	21.1221	21.1641	21.4555	21.5554	NA	NA	21.4269	21.3271	21.2882	21.6036	21.2849	21.7366	NA	NA	NA	22.9293	21.3515	22.2622	22.0766	21.9531	21.5963	21.9253	21.5049	NA	22.0602	22.3697	21.8875	21.8573	22.0064	21.7428	22.1098	NA	NA	22.1774	22.0907	22.367	21.6944	NA	NA	NA	NA	NA	NA	NA	NA	NA
Q9DAR7	29	Dcps	1	20.3514	NA	21.8548	22.3468	NA	NA	NA	NA	21.591	NA	21.7045	21.6839	21.4895	NA	NA	21.2046	NA	23.5438	21.2256	NA	NA	NA	NA	NA	21.4413	22.508	21.1119	20.7384	21.2201	20.9456	19.3271	NA	NA	20.3701	19.648	20.7057	20.475	NA	21.7001	21.8986	NA	NA	NA	NA	20.9012	NA
O08788	34	Dctn1	1	20.525	20.8743	21.0164	20.936	NA	NA	21.5794	21.3378	21.2009	20.9393	NA	NA	NA	NA	NA	NA	NA	NA	NA	20.7888	20.5932	21.1858	21.8935	NA	20.6444	21.0219	20.3437	20.7895	20.6033	21.0297	21.2278	NA	NA	21.3433	20.4529	20.4629	21.4107	20.3535	21.2992	21.3128	NA	NA	20.8917	20.869	20.829	20.8374
Q99LD8	13	Ddah2	1	19.0139	NA	NA	NA	NA	NA	NA	NA	NA	NA	NA	NA	NA	NA	NA	NA	NA	NA	NA	NA	NA	NA	NA	NA	NA	NA	NA	NA	NA	NA	NA	NA	NA	NA	NA	NA	NA	19.3825	18.6515	19.2878	19.0701	18.6313	19.4528	19.0327	19.285	19.0219
Q61655	8	Ddx19a	1	17.9882	18.5747	17.0955	17.7912	NA	NA	17.7632	18.2032	18.2358	18.2586	18.5159	18.0635	NA	NA	NA	NA	17.9207	18.1909	NA	NA	NA	NA	NA	NA	NA	NA	NA	NA	NA	NA	NA	NA	NA	NA	NA	NA	NA	18.5607	17.9153	NA	NA	18.598	17.662	NA	17.8215	18.5398
P00375	24	Dhfr	1	20.8378	21.3408	21.9348	21.2246	NA	NA	NA	22.782	21.6098	22.2229	20.8734	20.7981	NA	NA	NA	20.8347	21.5114	22.2274	20.6256	NA	21.6382	21.6942	NA	NA	NA	21.269	NA	21.9685	21.0122	21.039	21.4884	21.4515	NA	21.3731	21.4563	21.5254	21.4019	21.482	20.6132	21.3371	NA	NA	NA	21.4547	21.1566	22.0814
P60904	16	Dnajc5	1	19.3072	18.9769	18.8821	18.9473	NA	NA	19.0848	19.5458	19.0559	18.9553	19.8107	19.3489	NA	19.3827	NA	18.7237	18.7347	19.5887	20.0977	19.049	19.7211	18.9179	NA	19.532	19.6341	20.5412	19.2391	19.7509	18.5405	NA	NA	NA	NA	NA	18.6053	18.4737	18.2838	NA	NA	NA	NA	NA	NA	NA	NA	NA
Q6NZB0	25	Dnajc8	1	20.7162	22.7895	21.4509	21.4037	NA	NA	NA	21.5977	21.5819	21.704	NA	NA	NA	NA	NA	NA	NA	NA	NA	21.2855	21.4453	20.8778	21.3172	NA	21.1112	21.9518	21.9469	21.5661	NA	NA	NA	NA	NA	NA	NA	NA	NA	21.6834	21.0898	20.8696	NA	NA	20.169	20.5222	22.0326	21.4286
Q9Z2W0	46	Dnpep	1	21.6337	21.2436	20.8497	21.4531	NA	NA	NA	20.5818	20.7928	20.8788	NA	NA	NA	NA	NA	NA	NA	NA	NA	NA	22.4611	22.586	23.5714	NA	21.5361	21.73	21.5287	20.8726	NA	NA	NA	NA	NA	NA	NA	NA	NA	21.1994	20.6192	22.5811	23.0493	NA	21.2364	22.2161	21.7797	21.3418
P32233	24	Drg1	1	20.6561	NA	NA	NA	NA	NA	NA	NA	NA	NA	21.0186	20.2299	NA	NA	NA	20.406	20.978	21.1762	21.1727	NA	19.6154	20.1917	21.5269	NA	20.1005	21.1719	21.2429	20.7675	21.1397	20.9363	20.4666	NA	NA	21.1115	20.6611	21.1329	20.9463	NA	NA	NA	NA	NA	NA	NA	NA	NA
Q9CQ43	15	Dut	0.9997	19.4945	NA	NA	NA	NA	NA	NA	NA	NA	NA	NA	NA	NA	NA	NA	NA	NA	NA	NA	NA	18.4656	18.5216	19.6308	NA	19.4797	18.5668	19.0018	19.5554	19.4934	19.9522	19.4331	NA	NA	19.3298	19.2699	19.8	19.539	19.1912	19.7067	19.2853	NA	NA	19.1873	19.4503	19.2248	19.7906
Q8R1Q8	38	Dync1li1	1	20.8743	22.0114	21.772	21.5686	NA	NA	NA	21.1312	22.3498	22.385	21.2387	22.2508	20.6183	21.7459	NA	21.8338	21.8267	21.4718	21.6151	NA	NA	NA	NA	NA	NA	NA	NA	NA	20.8801	20.9141	21.0118	NA	NA	20.9947	20.7478	21.8513	21.3302	NA	NA	NA	NA	NA	NA	NA	NA	NA
Q9WUR2	9	Eci2	1	19.4178	20.9544	20.9867	20.4992	NA	NA	22.3861	20.32	19.8921	21.2751	NA	NA	NA	NA	NA	NA	NA	NA	NA	NA	NA	NA	NA	NA	NA	NA	NA	NA	19.857	19.3366	19.5088	NA	NA	19.5804	19.9243	19.2197	19.556	NA	NA	NA	NA	NA	NA	NA	NA	NA
Q9D1M4	16	Eef1e1	1	19.4787	NA	NA	NA	NA	NA	NA	NA	NA	NA	20.1107	20.1691	19.9078	19.4341	NA	20.2984	19.8746	18.7363	19.7219	19.5215	20.6739	NA	19.9551	NA	20.5632	20.2856	20.3064	19.4058	19.3336	19.4515	19.6802	NA	20.0462	19.662	19.5429	20.2353	19.3688	20.1779	19.087	18.8114	NA	20.0975	20.174	19.7065	19.7128	20.1891
Q01279	16	Egfr	1	19.0319	18.02	18.8181	18.6081	NA	NA	19.1234	18.5373	18.8855	18.5473	NA	NA	NA	NA	NA	NA	NA	NA	NA	NA	NA	NA	NA	NA	NA	NA	NA	NA	NA	NA	NA	NA	NA	NA	NA	NA	NA	18.7923	19.0133	19.3379	NA	19.4524	17.6554	18.8825	19.2789	18.8925
Q9EQP2	34	Ehd4	1	20.9683	NA	21.851	22.0044	NA	NA	NA	NA	NA	NA	NA	NA	NA	NA	NA	NA	NA	NA	NA	NA	20.8704	21.3869	21.1266	NA	21.6832	21.8267	21.7523	21.7697	21.2687	21.5672	21.7288	NA	NA	21.3148	21.9685	21.0874	NA	21.7129	21.0739	21.0351	NA	NA	21.0407	20.8892	19.8272	21.4809
Q8BMJ3	23	Eif1ax	1	22.1407	21.9712	22.8086	22.3592	NA	NA	21.4821	22.2926	21.9323	21.7226	21.8095	22.2672	21.5522	21.5478	NA	21.8902	22.4095	21.9353	21.6877	NA	NA	NA	NA	NA	NA	NA	NA	NA	NA	NA	NA	NA	NA	NA	NA	NA	NA	NA	NA	NA	NA	NA	NA	NA	NA	NA
Q03963	37	Eif2ak2	1	21.0644	22.4483	22.4221	22.6842	NA	NA	NA	NA	21.0656	NA	19.8329	20.694	NA	NA	NA	NA	NA	20.0173	19.7818	NA	NA	21.6974	NA	NA	21.07	20.7056	21.4315	21.1349	20.7369	21.701	21.3196	NA	NA	21.3324	20.6507	20.6097	20.1124	20.9666	21.8041	21.8315	NA	NA	21.0329	20.2146	20.9138	20.0216
Q91WK2	37	Eif3h	1	21.6169	NA	19.1031	20.8419	NA	NA	NA	NA	NA	19.0252	21.5128	NA	21.9164	NA	NA	NA	21.3002	20.6164	NA	22.0521	22.3996	22.2501	22.0346	22.2569	22.6058	21.7807	22.1269	21.5805	NA	21.4547	NA	NA	NA	21.2707	20.9038	22.0238	21.1752	21.9829	22.1968	21.2707	NA	NA	NA	NA	20.6945	21.3247
Q3UGC7	37	Eif3j1	1	21.6109	22.7916	22.0023	23.912	22.158	NA	22.1978	22.0552	22.5898	22.3839	23.2527	23.0568	23.0231	22.6337	21.7577	23.1732	23.1016	22.9302	22.621	23.4198	22.3114	22.4555	22.4903	21.4265	22.1596	21.7519	21.9884	21.5658	22.8108	23.7575	22.0407	NA	21.1963	23.2781	22.007	22.3774	22.4317	NA	NA	NA	NA	NA	NA	NA	NA	NA
Q05D44	37	Eif5b	1	20.614	21.7866	20.7728	NA	NA	NA	NA	NA	21.3021	20.4122	20.544	NA	NA	NA	NA	21.7078	21.7529	20.5228	NA	21.2223	21.7254	20.9602	20.9433	NA	NA	21.0511	20.8284	21.5863	21.0562	21.6262	21.5576	NA	NA	21.1819	21.6518	21.3037	21.3199	21.4845	21.0149	21.1643	NA	21.5895	21.8095	21.2202	20.9498	20.6877
O70378	10	Emc8	1	19.5216	19.746	19.772	20.0322	NA	NA	19.5112	19.7405	19.7829	19.9011	NA	NA	NA	NA	NA	NA	NA	NA	NA	19.6684	20.0583	19.9458	NA	NA	19.9718	20.4864	19.6511	19.183	NA	20.1515	19.2124	20.3189	NA	20.0475	20.2036	20.2394	19.0866	20.3405	NA	NA	NA	NA	20.155	NA	19.7594	NA
O08579	43	Emd	1	21.7711	21.54	21.0517	NA	NA	NA	NA	21.5056	21.3843	22.188	NA	NA	NA	NA	NA	21.9512	NA	21.6997	20.8604	21.1324	22.0837	21.7589	NA	NA	22.0402	21.7991	21.8808	22.3319	21.2065	21.9706	NA	22.1203	NA	22.086	22.1878	21.8296	21.7614	NA	NA	20.5068	NA	NA	21.3238	21.959	21.3021	21.8836
Q03173	13	Enah	1	19.0847	19.6404	20.899	20.735	NA	NA	20.1472	20.0054	20.0068	21.0175	NA	NA	NA	NA	NA	NA	NA	NA	NA	NA	20.424	20.1048	20.6789	NA	20.5917	20.785	21.2316	20.8344	21.387	20.6001	20.9689	19.6023	NA	20.2188	20.9549	21.0396	20.7952	19.8365	19.6499	20.8508	NA	NA	20.2624	20.2033	20.896	21.6225
P21550	19	Eno3	1	20.6168	19.5064	NA	NA	NA	NA	NA	19.7153	20.0843	20.0885	20.4443	20.4193	NA	NA	NA	NA	NA	20.1065	NA	NA	NA	NA	NA	NA	NA	NA	NA	NA	20.3551	21.786	20.7324	NA	NA	20.38	20.7507	20.5359	20.0318	NA	19.3669	NA	NA	NA	NA	19.96	20.0106	19.9857
Q9DC16	10	Ergic1	1	19.0424	19.0408	17.865	18.6486	NA	NA	NA	NA	18.6313	19.645	NA	NA	NA	NA	NA	NA	NA	NA	NA	19.9645	17.8679	NA	18.9118	NA	19.1255	18.9257	20.2794	18.6989	NA	NA	NA	NA	NA	NA	NA	NA	NA	18.5169	18.2082	NA	NA	NA	18.4088	18.6553	19.3623	19.8763
Q8BFZ9	17	Erlin2	1	20.0056	NA	NA	20.6814	NA	NA	21.1838	NA	20.7611	20.1051	NA	19.2769	NA	NA	NA	NA	NA	NA	NA	NA	NA	NA	NA	NA	NA	NA	NA	NA	18.4764	18.706	18.2599	NA	NA	NA	18.6823	18.5426	17.6508	NA	19.3268	18.5721	NA	NA	18.4494	NA	18.7901	18.41
O35250	12	Exoc7	0.9949	23.3363	NA	NA	NA	NA	NA	NA	NA	NA	NA	21.3005	21.2682	NA	21.7133	22.2232	NA	21.7087	20.7812	NA	NA	NA	NA	NA	NA	NA	NA	NA	NA	NA	NA	NA	NA	NA	NA	NA	NA	NA	19.7317	NA	20.132	NA	22.1382	NA	21.1038	20.8224	19.3366
Q3TDN2	20	Faf2	1	20.3032	19.403	20.7604	NA	NA	NA	20.6446	NA	19.8778	20.4775	NA	NA	NA	NA	NA	NA	NA	NA	NA	20.9754	NA	NA	NA	NA	NA	NA	20.3737	20.3598	NA	NA	NA	NA	NA	20.8735	20.1443	20.1783	21.2348	NA	NA	NA	NA	NA	NA	NA	NA	NA
Q6A0A9	23	FAM120A	1	20.0397	NA	19.7051	20.3174	NA	NA	21.389	20.063	20.6199	20.4949	20.4386	20.2937	21.3661	20.8719	NA	21.1329	21.7829	20.7404	20.0438	NA	19.3853	NA	NA	NA	20.6074	19.7858	19.9958	19.5797	20.4768	19.5409	NA	NA	NA	19.9175	19.81	19.0422	21.0279	19.6865	18.8875	19.7638	NA	NA	19.893	19.5913	19.6895	20.4951
Q9D6U8	17	Fam162a	0.9981	20.7101	NA	NA	NA	NA	NA	NA	NA	NA	NA	NA	NA	NA	NA	NA	NA	NA	NA	NA	21.3485	21.1817	21.2527	20.3354	NA	20.9014	20.7555	21.5443	20.7243	21.8324	20.6396	20.6676	21.0352	NA	21.3663	21.4545	21.7604	21.7203	NA	NA	NA	NA	NA	NA	NA	NA	NA
Q91VU0	21	Fam3c	1	20.6585	20.7404	21.0948	21.0154	NA	NA	22.3211	21.6825	20.8925	20.1449	NA	NA	NA	NA	NA	NA	NA	NA	NA	22.2031	21.3879	21.1107	21.2623	20.9302	23.7237	22.2489	21.2184	21.064	22.3141	21.9788	NA	22.0736	21.5826	22.3202	20.7598	21.1128	21.0577	21.0576	NA	20.8433	22.0537	21.5501	22.034	20.7282	21.7871	21.6887
F8VPU2	12	Farp1	1	18.6213	NA	NA	NA	NA	NA	NA	NA	NA	NA	NA	NA	NA	NA	NA	NA	NA	NA	NA	20.1531	20.2146	20.2824	19.913	18.5708	20.1006	20.6721	20.6162	20.2509	NA	NA	NA	NA	NA	NA	NA	NA	NA	NA	NA	NA	NA	NA	NA	NA	NA	NA
Q8C0C7	18	Farsa	1	19.8665	NA	NA	22.2935	NA	NA	21.4399	22.5938	21.6411	21.767	18.794	20.7008	NA	20.3752	NA	20.1429	19.8639	20.7937	20.4152	21.3685	20.8697	20.8002	21.7462	NA	20.8216	21.1645	20.0468	21.2604	22.4469	NA	21.2832	NA	21.3626	21.7352	21.801	20.9212	19.934	NA	21.1523	22.391	NA	NA	21.9762	22.3691	21.4211	21.1358
P39749	29	Fen1	1	20.8419	NA	21.7819	NA	NA	NA	NA	NA	21.4291	22.1027	21.5218	22.6239	NA	21.035	NA	22.4199	21.8289	21.6923	21.4424	NA	21.9522	21.2204	NA	20.8686	21.0124	21.7991	21.3353	21.3728	20.7639	21.2621	21.058	NA	NA	21.3577	21.0647	21.2414	20.0992	NA	NA	NA	NA	NA	NA	NA	NA	NA
Q8CIB5	13	Fermt2	1	19.0807	18.6003	19.0693	18.3548	NA	NA	NA	NA	18.9566	18.4365	19.0851	19.2904	NA	19.6817	NA	19.3447	NA	19.0444	19.5726	NA	NA	19.5042	NA	NA	NA	17.6719	18.7447	NA	NA	NA	NA	NA	NA	NA	NA	NA	NA	NA	NA	NA	NA	NA	NA	NA	NA	NA
Q9CQ92	18	Fis1	1	19.901	20.9711	20.8212	20.4199	NA	NA	20.2546	20.3057	20.5611	21.1348	NA	NA	NA	NA	NA	NA	NA	NA	NA	NA	21.159	20.2776	NA	NA	20.7066	20.0828	21.3634	21.7137	20.5472	20.7275	21.2605	20.4132	NA	20.8902	21.0361	21.113	21.2615	NA	NA	NA	NA	NA	NA	NA	NA	NA
Q60634	27	Flot2	1	20.9432	21.6082	21.4077	21.4348	NA	NA	NA	22.1128	21.1691	21.1654	21.182	NA	NA	NA	NA	NA	NA	NA	NA	NA	NA	NA	NA	NA	NA	NA	NA	NA	NA	21.5854	NA	NA	NA	NA	21.6485	NA	NA	NA	NA	21.2681	NA	NA	21.3609	22.4604	20.5593	21.5343
P35922	20	Fmr1	1	20.5205	22.4763	21.6061	22.4157	NA	NA	NA	22.7882	21.0861	22.5028	21.4279	20.6257	NA	21.1221	21.3649	22.2982	21.6039	20.9006	20.5055	21.5925	NA	22.3884	NA	NA	21.6	NA	20.2207	NA	21.797	22.2532	NA	21.685	NA	21.1751	21.2943	20.6515	NA	21.7498	21.4343	21.9569	NA	NA	21.5928	22.2274	21.4118	20.9604
Q62356	18	Fstl1	1	19.273	18.6617	NA	19.1103	NA	NA	21.3331	18.797	19.4537	NA	20.6434	20.2297	NA	NA	NA	21.2942	NA	18.6736	19.7134	NA	NA	NA	NA	NA	NA	NA	NA	NA	NA	NA	NA	NA	NA	NA	NA	NA	NA	NA	NA	NA	NA	NA	NA	NA	NA	NA
Q9D6K8	24	Fundc2	1	19.9139	20.1	20.8213	20.5154	NA	NA	19.9567	20.3872	20.0377	20.3409	20.6383	19.2752	NA	NA	NA	20.29	19.6528	20.1209	19.4446	20.6091	NA	19.6569	NA	NA	20.3804	19.8365	20.931	20.3999	NA	NA	NA	NA	NA	NA	NA	NA	NA	20.7345	19.8524	20.8923	NA	NA	20.7275	20.9669	20.2767	20.5272
Q64737	18	Gart	1	20.0106	20.3115	20.1814	19.8523	NA	NA	19.9029	19.6836	19.9067	19.5776	20.9764	20.8093	NA	20.7606	NA	20.4233	20.3366	20.6979	20.3477	NA	NA	NA	NA	NA	NA	NA	NA	NA	NA	NA	NA	NA	NA	NA	NA	NA	NA	20.73	19.9258	21.3246	NA	NA	21.4548	21.3895	20.7809	20.7457
Q9D964	22	Gatm	1	19.9847	NA	NA	NA	NA	NA	NA	NA	NA	NA	NA	NA	NA	NA	NA	NA	NA	NA	NA	NA	NA	NA	NA	NA	NA	21.1786	20.8558	NA	NA	NA	NA	NA	NA	NA	NA	NA	NA	NA	NA	NA	NA	NA	NA	NA	NA	NA
P17439	38	Gba1	1	20.7872	21.0613	20.5202	20.9289	NA	NA	21.8415	21.739	20.0719	20.7846	21.2253	20.5542	21.4516	21.3838	NA	21.4283	21.3474	20.6262	20.9054	NA	21.422	NA	21.4388	NA	21.1017	21.4482	21.0611	NA	20.2858	20.1187	NA	NA	NA	20.4379	20.5731	20.1525	20.0216	NA	20.9865	20.3928	NA	NA	20.4711	22.3578	20.7354	20.6278
Q9Z0E6	54	Gbp2	1	21.4977	21.7011	21.4502	22.1687	NA	NA	21.8808	21.6582	21.2216	21.5754	22.7436	22.4322	NA	NA	NA	22.4958	NA	22.6783	22.472	21.9603	21.8147	22.4094	NA	NA	22.128	21.8974	21.5911	21.6177	21.9046	22.1997	22.7468	NA	NA	22.0764	21.8453	22.1785	21.4799	NA	NA	NA	NA	NA	NA	NA	NA	NA
P23591	29	Gfus	1	21.5555	20.354	20.1863	NA	NA	NA	NA	21.5618	20.0383	20.2781	21.5213	20.8605	NA	NA	NA	21.684	21.2484	21.0452	21.4572	21.7182	20.8282	21.5572	NA	NA	20.5041	21.2866	20.9316	21.3458	21.1578	NA	21.1375	NA	NA	20.798	NA	20.9098	21.7739	21.2998	NA	NA	NA	NA	NA	21.231	20.8843	21.2679
Q6Y7W8	9	Gigyf2	0.9942	20.6089	22.7647	23.1618	23.3956	NA	21.4698	21.4019	21.8021	21.9686	21.2947	NA	NA	NA	NA	NA	NA	NA	NA	NA	NA	NA	NA	NA	NA	NA	NA	NA	NA	NA	NA	NA	NA	NA	NA	NA	NA	NA	NA	NA	NA	NA	NA	NA	NA	NA	NA
Q61543	28	Glg1	1	19.8464	NA	19.8945	NA	NA	NA	NA	NA	20.0489	20.5868	NA	NA	NA	NA	NA	NA	NA	NA	NA	21.002	NA	NA	NA	NA	NA	NA	19.9494	20.2552	20.986	NA	20.0032	NA	NA	NA	20.5641	20.1062	20.9867	19.6432	NA	NA	NA	NA	19.5992	20.0232	19.1377	19.8544
Q9QUH0	22	Glrx	1	19.9891	19.9124	20.2745	20.9805	NA	NA	20.7619	20.2063	19.7638	20.5467	20.4807	NA	NA	NA	NA	19.579	NA	20.3465	20.5605	NA	NA	19.8419	NA	20.4494	20.2743	20.744	19.8309	19.3706	20.3908	19.4548	20.8791	NA	NA	NA	NA	19.8918	20.1761	20.2286	20.0673	20.8272	NA	NA	NA	19.9931	19.5299	20.0882
Q9JL62	15	Gltp	0.9989	18.8495	18.8585	20.569	20.1257	NA	NA	19.3852	19.719	20.3152	19.176	18.4777	19.1791	19.3683	19.7125	NA	19.1932	20.0802	19.4501	NA	19.2769	19.7244	20.2716	19.614	NA	19.6806	19.071	19.5242	19.1682	19.0587	19.8612	20.3674	NA	NA	20.3117	19.9291	19.7208	19.5582	19.3844	20.1663	20.3959	19.2541	19.4711	20.4022	20.0572	19.3195	19.251
Q9CQI3	32	Gmfb	1	21.4098	20.2709	20.2804	20.2671	NA	NA	NA	20.3942	20.6714	20.4975	19.8839	19.9657	NA	NA	NA	NA	20.3389	19.9269	NA	21.8833	21.0211	21.304	NA	NA	22.0256	21.4953	20.8902	NA	20.9965	20.839	19.9421	NA	NA	20.46	20.0885	20.2819	20.4593	21.7832	20.8938	22.0177	NA	NA	21.384	21.1254	21.4648	21.1453
Q9DC51	29	Gnai3	1	21.6906	NA	19.9769	NA	NA	NA	NA	21.3575	21.2427	NA	NA	22.0734	NA	NA	NA	21.7011	NA	21.8696	21.9707	NA	NA	NA	NA	NA	NA	NA	NA	NA	21.2787	21.7343	21.6985	22.1515	NA	21.8519	20.6876	21.334	21.6749	21.7227	21.9175	22.0778	NA	NA	22.6185	NA	21.6594	22.0067
Q9DAS9	21	Gng12	1	20.5573	NA	NA	NA	NA	NA	NA	NA	NA	NA	20.0691	NA	NA	NA	NA	NA	NA	19.4401	20.0091	NA	20.3208	19.8423	19.9479	NA	20.3668	19.7251	20.3119	20.0743	NA	NA	NA	NA	NA	NA	NA	NA	NA	20.2451	19.8258	18.6752	NA	NA	19.8958	19.5104	19.3511	20.0316
P36916	21	Gnl1	1	20.0836	21.9713	20.2489	20.9164	NA	NA	21.4849	NA	21.6546	22.0673	21.4405	NA	NA	NA	NA	21.2863	21.672	20.602	21.8568	20.2545	20.4706	20.4164	20.4111	NA	20.73	21.4497	21.7487	21.1837	21.1163	20.7179	20.3558	NA	NA	20.927	21.3967	21.5779	21.5301	20.3583	20.9666	21.415	20.9404	NA	21.1276	20.6865	20.8438	21.5423
Q8CI11	12	Gnl3	1	18.3827	20.2042	20.3643	21.5333	NA	NA	20.3498	20.8031	20.6999	19.983	20.4739	20.8102	20.707	20.981	NA	NA	NA	20.7384	20.2571	NA	NA	NA	NA	20.1674	19.9509	19.7766	19.6959	NA	NA	19.2071	20.5686	NA	19.7363	20.2808	20.5265	19.2916	19.0037	NA	NA	NA	NA	NA	NA	NA	NA	NA
Q8BXA1	28	Golim4	1	19.3481	19.8236	20.2436	NA	NA	NA	20.4684	19.995	18.8825	19.7647	NA	NA	NA	NA	NA	NA	NA	NA	NA	NA	20.8038	19.5244	NA	20.5476	20.8461	20.2076	19.5229	20.1266	19.9126	NA	20.0713	NA	NA	NA	NA	19.4974	20.5792	NA	NA	NA	NA	NA	NA	NA	NA	NA
P05201	27	Got1	1	21.2073	19.9454	19.8885	19.5306	NA	NA	NA	NA	19.832	20.7975	NA	NA	NA	22.3655	NA	22.0589	NA	NA	22.354	NA	NA	NA	NA	NA	NA	NA	NA	NA	NA	20.2158	NA	NA	NA	19.7581	NA	19.6015	20.3269	20.8015	NA	NA	NA	NA	NA	20.5455	20.2756	20.2712
Q64521	30	Gpd2	1	20.1553	20.8412	NA	21.0823	NA	NA	NA	20.4527	20.2636	NA	NA	20.1954	NA	22.1337	NA	NA	20.5035	21.3006	20.2376	NA	20.2507	NA	NA	NA	21.0655	NA	20.2947	20.6869	NA	NA	NA	NA	NA	NA	NA	NA	NA	NA	NA	NA	NA	NA	21.5939	NA	20.3304	21.0835
O70325	10	Gpx4	0.9999	17.9466	17.5674	17.5614	18.3819	NA	NA	17.1582	17.1011	17.1199	18.1763	NA	NA	NA	NA	NA	NA	NA	NA	NA	17.954	18.807	19.4149	NA	18.1971	17.8529	18.76	18.2236	17.172	18.3981	18.6765	19.0264	NA	NA	18.183	16.6915	18.5575	18.744	17.8783	18.4809	18.6592	NA	NA	17.6841	18.1028	18.2525	18.3104
O09131	25	Gsto1	1	20.4763	20.0674	19.7537	19.6365	NA	NA	20.5634	20.2244	19.9429	20.4263	NA	NA	NA	NA	NA	NA	NA	NA	NA	NA	NA	NA	NA	NA	NA	NA	NA	NA	NA	NA	NA	NA	NA	NA	NA	NA	NA	20.8692	20.3059	20.5408	NA	NA	20.8955	20.491	21.0738	20.6132
Q9D3B1	11	Hacd2	1	21.7717	21.9024	22.1849	22.5107	21.9681	NA	22.4534	22.0609	21.7771	22.2515	22.3616	22.632	NA	21.9469	NA	22.5898	22.1623	22.8357	22.7268	NA	NA	NA	NA	NA	NA	NA	NA	NA	NA	NA	NA	NA	NA	NA	NA	NA	NA	NA	NA	NA	NA	NA	NA	NA	NA	NA
Q8K2C9	8	Hacd3	1	19.2232	NA	NA	NA	NA	NA	NA	NA	NA	NA	NA	NA	NA	NA	NA	NA	NA	NA	NA	NA	NA	NA	NA	NA	NA	NA	NA	NA	18.7984	NA	18.5409	NA	NA	19.5122	18.9001	18.8133	19.5285	NA	NA	NA	NA	NA	NA	NA	NA	NA
Q8BY71	9	Hat1	1	19.0829	NA	NA	NA	NA	NA	NA	NA	NA	NA	NA	NA	NA	NA	NA	NA	NA	NA	NA	NA	NA	NA	NA	NA	NA	NA	NA	NA	NA	NA	NA	NA	NA	NA	NA	NA	NA	NA	NA	NA	NA	NA	NA	NA	NA	NA
O09106	34	Hdac1	1	21.0886	20.51	21.2962	21.3277	NA	NA	20.8198	21.312	21.8429	21.868	NA	NA	NA	NA	NA	NA	NA	NA	NA	NA	NA	NA	NA	NA	NA	NA	NA	NA	21.1989	20.5502	NA	NA	NA	20.9302	21.7952	21.1392	21.2461	NA	NA	NA	NA	NA	NA	NA	NA	NA
Q9JMG7	25	Hdgfl3	1	19.9574	20.4975	20.1133	20.2757	NA	NA	NA	19.7679	20.9441	19.6566	NA	NA	NA	NA	NA	NA	NA	NA	NA	NA	NA	NA	NA	NA	NA	20.9263	NA	NA	20.8705	19.6468	21.0064	NA	NA	20.4461	19.8376	20.0566	21.2003	20.6702	20.1947	19.9003	NA	NA	19.6604	20.8631	21.2611	20.7957
Q99LI8	11	Hgs	1	18.6105	NA	NA	NA	NA	NA	NA	NA	NA	NA	NA	NA	NA	NA	NA	NA	NA	NA	NA	NA	NA	NA	NA	NA	NA	NA	NA	NA	NA	NA	NA	NA	NA	NA	NA	NA	NA	NA	NA	NA	NA	NA	NA	NA	NA	NA
Q8VD75	19	Hip1	1	18.9081	21.2919	19.9564	21.5964	19.2586	NA	20.1651	21.6575	20.1888	20.0663	19.2826	19.4439	NA	19.5362	NA	19.8174	19.4398	20.0546	19.3307	NA	NA	NA	NA	NA	NA	NA	NA	NA	19.2973	19.1639	19.7587	NA	NA	19.5059	20.0069	19.6688	19.9987	18.7773	20.0996	NA	NA	NA	18.6663	20.9862	19.6921	19.1805
Q8JZK9	33	Hmgcs1	1	21.4576	NA	NA	NA	NA	NA	NA	NA	NA	NA	20.9345	19.6305	21.1364	NA	NA	20.5663	20.9905	21.7151	NA	NA	NA	20.6271	NA	NA	20.9843	21.6583	20.0515	20.2053	NA	NA	NA	NA	NA	20.7745	20.1238	20.518	19.9622	20.1885	20.5068	NA	21.7539	NA	NA	NA	20.6665	NA
O70252	44	Hmox2	1	20.6705	19.7688	20.9468	20.553	NA	NA	20.8525	20.9895	20.7519	20.2626	NA	NA	NA	NA	NA	NA	NA	NA	NA	22.536	21.2793	20.5873	NA	NA	21.4351	22.5688	21.4478	20.344	20.1404	20.4047	22.7519	20.6887	20.8877	21.2713	20.9022	20.9359	20.1685	NA	NA	NA	NA	NA	NA	22.5564	NA	22.0373
Q921F4	14	Hnrnpll	1	19.4539	NA	NA	NA	NA	NA	NA	NA	NA	NA	19.6579	19.7721	NA	NA	NA	20.3363	NA	20.3655	20.2533	19.4103	19.3773	19.5638	NA	NA	19.1909	20.0337	19.6556	19.3412	NA	NA	NA	NA	NA	NA	NA	NA	NA	21.0164	21.1191	21.0984	20.2224	20.1622	20.9094	20.6703	20.5449	19.4082
Q8VDM6	12	Hnrnpul1	1	19.0142	NA	NA	NA	NA	NA	NA	NA	NA	NA	18.8917	19.8233	NA	NA	NA	NA	19.5205	19.7189	NA	NA	NA	NA	NA	NA	NA	NA	NA	NA	NA	NA	NA	NA	NA	NA	NA	NA	NA	20.1764	19.4859	19.7586	NA	NA	19.6574	20.703	19.4537	20.0168
Q3TEA8	19	Hp1bp3	1	19.8179	20.0067	20.0522	20.5317	NA	NA	20.1523	19.9119	20.2409	20.146	NA	NA	NA	NA	NA	NA	NA	NA	NA	NA	21.6363	21.1085	NA	NA	19.5838	19.4914	18.7288	NA	21.2309	21.5473	20.6797	NA	NA	20.2056	21.276	20.4486	20.8808	NA	NA	NA	NA	NA	NA	NA	NA	NA
P00493	23	Hprt1	1	19.819	19.8035	20.4569	20.4096	NA	NA	20.5361	19.7724	19.4296	19.0892	NA	NA	NA	NA	NA	19.576	NA	18.3539	NA	NA	NA	NA	NA	NA	NA	19.7643	18.3297	NA	19.7322	NA	NA	NA	NA	19.7411	NA	19.3514	NA	20.3737	NA	20.1659	NA	NA	20.111	20.4678	20.2992	20.23
O08756	30	Hsd17b10	1	20.7459	NA	21.8998	22.0706	NA	NA	22.1398	NA	20.9998	21.6372	21.5572	NA	NA	NA	NA	21.3293	NA	NA	21.5409	NA	NA	NA	NA	NA	NA	NA	NA	NA	NA	NA	NA	NA	NA	NA	NA	NA	NA	NA	NA	NA	NA	NA	NA	NA	NA	NA
P51660	12	Hsd17b4	1	18.7276	NA	NA	NA	NA	NA	NA	NA	NA	NA	NA	NA	NA	NA	NA	NA	NA	NA	NA	19.9998	19.8914	NA	NA	19.7308	NA	21.0763	19.7843	NA	NA	NA	NA	NA	NA	NA	NA	NA	NA	19.0965	18.8809	18.8257	NA	NA	NA	18.8616	19.6207	18.9512
Q61699	43	Hsph1	1	21.3884	22.2422	21.7669	22.6781	NA	NA	21.8962	20.7324	21.7926	22.9306	21.139	20.8116	NA	NA	21.5503	21.7884	20.6693	21.0112	21.1612	22.208	21.6347	21.0513	NA	NA	21.3674	21.4186	20.9665	22.0854	21.8377	20.458	NA	NA	NA	21.7687	21.6251	20.5624	21.5897	21.4858	22.2096	21.3393	22.1742	NA	22.4825	NA	21.5969	20.1897
Q9JHR7	24	Ide	1	20.4631	NA	NA	NA	NA	NA	NA	NA	NA	NA	20.299	19.8036	NA	NA	NA	NA	20.4322	19.9486	20.6649	20.7039	NA	NA	NA	NA	NA	19.2443	20.4641	20.6302	NA	NA	NA	NA	NA	NA	NA	NA	NA	20.0975	19.9627	NA	NA	NA	NA	NA	19.3834	NA
O88477	21	Igf2bp1	1	20.14	22.0147	20.7098	21.0836	NA	NA	21.2701	20.4579	20.5725	20.0577	20.0313	19.8265	NA	NA	NA	20.0287	NA	20.8144	20.1592	NA	19.8576	20.3912	NA	NA	19.9508	20.2848	20.4523	20.0676	20.1161	20.3549	20.8226	NA	NA	20.8935	19.8795	20.074	20.7606	21.4249	21.5694	20.2846	NA	NA	20.8718	NA	20.8345	20.4845
Q9DCE9	21	Igtp	1	19.424	NA	NA	NA	NA	NA	NA	NA	NA	NA	19.772	19.5073	NA	NA	NA	21.2951	21.119	NA	19.4343	NA	NA	NA	NA	NA	NA	NA	NA	NA	NA	NA	NA	NA	NA	NA	NA	NA	NA	NA	21.0641	21.0295	NA	NA	21.1742	20.5187	20.1421	19.2962
Q9CXY6	38	Ilf2	1	21.0618	22.1247	22.7185	22.6331	NA	NA	22.9167	22.8374	22.2371	22.1247	20.1427	20.8169	NA	NA	NA	20.1908	21.1855	20.4583	20.6969	23.1605	21.7341	23.5369	22.5689	NA	23.3957	23.4265	23.0068	22.6054	NA	NA	NA	NA	NA	NA	NA	NA	NA	20.8632	NA	NA	NA	NA	21.5415	21.4225	21.3839	20.591
O55222	10	Ilk	0.9995	18.412	18.671	19.0926	18.5149	NA	NA	18.3287	18.5517	18.9551	19.088	NA	NA	NA	NA	NA	NA	NA	NA	NA	18.6714	18.6923	18.3509	NA	NA	18.6098	19.0275	19.2174	19.2568	NA	NA	NA	NA	NA	NA	NA	NA	NA	18.7425	18.9708	18.544	NA	NA	18.6411	19.1555	19.0091	18.8685
O55023	16	Impa1	1	20.2571	NA	NA	NA	NA	NA	NA	NA	NA	NA	NA	NA	NA	NA	NA	NA	NA	NA	NA	21.1136	21.2712	21.5253	NA	NA	20.844	20.2268	21.7343	21.7346	21.5366	21.3886	21.2744	21.0775	20.5038	21.5112	21.5893	21.9578	21.9256	20.1864	19.0323	19.6216	NA	20.0563	19.2643	19.6346	20.257	19.4598
Q9EPL8	20	Ipo7	1	19.9265	20.4927	NA	NA	NA	NA	NA	20.7937	20.9077	21.0354	19.8472	20.535	NA	NA	NA	20.8628	20.0201	20.2504	20.2129	NA	20.0441	21.2137	NA	NA	20.7894	20.131	20.3791	20.928	20.756	20.1089	21.1595	NA	20.7825	21.1099	20.8371	20.537	20.5554	NA	NA	NA	NA	NA	NA	NA	NA	NA
Q60766	24	Irgm1	1	20.1973	20.7509	20.7218	20.5377	NA	NA	20.7423	19.9727	18.8276	20.27	20.2615	19.7628	NA	20.1679	NA	20.2426	19.3549	21.8045	19.3516	NA	NA	NA	NA	NA	NA	NA	NA	NA	19.3932	20.0702	20.0282	NA	NA	20.2418	20.8115	19.6548	19.6153	20.1951	20.8254	19.9143	NA	NA	20.6654	21.3163	19.9599	19.4611
P11688	15	Itga5	1	19.662	NA	NA	20.1014	NA	NA	NA	19.9674	NA	20.0468	20.144	19.8155	NA	NA	20.4998	NA	NA	NA	NA	19.5403	19.662	19.6651	NA	NA	19.9647	19.9219	19.4218	20.029	19.1179	NA	19.3933	NA	NA	NA	NA	18.5779	19.898	19.5959	19.0578	NA	NA	NA	NA	19.4717	NA	19.4608
Q6PGH2	16	Jpt2	1	20.0928	21.5346	22.2194	21.6748	NA	NA	20.6804	21.3516	20.6653	20.2164	20.0493	20.9407	20.5691	NA	NA	20.3698	21.0039	20.1963	20.408	21.3005	21.2789	21.7112	21.6527	NA	20.8605	21.0781	21.399	21.214	NA	NA	NA	NA	NA	NA	NA	NA	NA	21.0815	21.5677	21.3852	20.9884	NA	20.9916	20.4075	20.318	20.8341
Q60749	16	Khdrbs1	1	20.9284	NA	NA	NA	NA	NA	NA	NA	NA	NA	19.7761	NA	NA	NA	NA	NA	NA	19.5373	NA	20.813	22.03	21.5915	20.9942	21.1096	21.0366	22.8862	21.3428	20.5705	NA	NA	NA	NA	NA	NA	NA	NA	NA	21.9817	21.0668	21.8222	NA	NA	20.692	21.9534	22.1187	21.5951
O35344	36	Kpna3	1	21.0089	21.2274	21.5736	20.9944	NA	NA	22.2477	21.2823	20.9502	NA	21.6125	21.1465	NA	NA	NA	20.8498	NA	21.3884	20.9369	21.6741	21.6419	21.3734	21.5045	NA	22.0801	20.9574	21.2928	21.4981	21.2364	20.9918	21.2275	NA	NA	21.1029	21.4903	21.4192	21.4927	21.8193	21.208	20.3952	NA	NA	21.1222	21.0143	21.093	21.3369
Q9CQ22	20	Lamtor1	1	20.7911	NA	NA	NA	NA	NA	NA	NA	NA	NA	20.5841	19.7723	NA	NA	NA	NA	21.2577	20.7627	21.2989	20.9512	21.0792	21.4145	21.5322	21.5072	20.9599	20.4741	20.0991	20.7741	20.2407	20.4221	20.439	NA	NA	21.1155	20.7164	20.5249	20.1998	20.0207	20.1913	19.8036	NA	NA	20.7954	20.3959	20.2294	20.1285
Q9JHS3	14	Lamtor2	1	19.9425	20.5283	20.1532	20.6604	NA	NA	20.3599	20.7662	20.484	20.168	20.5265	20.9779	NA	NA	NA	20.6287	21.0473	20.9881	NA	20.7711	20.5117	20.6947	NA	NA	20.1546	20.1863	20.2249	NA	20.5622	20.0128	20.1998	NA	NA	21.0637	21.0432	20.8853	20.2481	20.4314	NA	21.228	NA	NA	21.633	NA	20.8172	20.5245
O88653	25	Lamtor3	1	20.6352	20.9336	20.3426	21.8559	NA	NA	20.8406	21.1995	21.4051	20.5919	21.1959	21.4678	NA	20.3983	NA	20.3792	20.188	20.7484	20.594	21.5536	20.9249	21.2911	NA	NA	20.379	20.8333	20.4717	20.6986	20.1607	20.6222	21.4005	21.0502	21.1016	21.4055	21.4128	20.7212	21.0289	19.6749	20.396	20.2684	NA	NA	NA	20.1423	19.3305	19.3159
Q8CF66	16	Lamtor4	1	19.8958	20.0248	NA	NA	NA	NA	NA	NA	19.4042	NA	18.9841	18.8411	NA	NA	19.6816	18.8737	19.6191	NA	NA	NA	NA	NA	NA	NA	NA	NA	NA	NA	20.0711	19.8829	NA	NA	NA	NA	NA	20.0267	19.8111	NA	NA	19.6458	NA	20.2805	20.2629	19.219	19.6765	18.6721
Q9D1L9	23	Lamtor5	1	21.1604	20.1516	19.6331	NA	NA	NA	NA	20.9647	NA	22.9297	NA	NA	NA	NA	NA	NA	NA	NA	NA	NA	NA	NA	NA	NA	NA	NA	21.7603	21.5175	NA	20.827	20.8774	NA	NA	NA	20.7534	20.2847	20.7048	NA	NA	NA	NA	NA	NA	NA	21.0608	NA
Q3U9G9	22	Lbr	1	20.478	21.2895	21.2133	20.2023	NA	NA	21.4507	21.0416	20.8667	NA	21.4416	21.5562	NA	22.1517	NA	21.3627	21.0204	20.5633	21.7041	NA	NA	NA	NA	NA	NA	NA	NA	NA	NA	NA	NA	NA	NA	21.0731	21.0946	21.0802	NA	NA	21.0677	21.769	NA	NA	21.1912	NA	21.1127	21.3039
Q07797	20	Lgals3bp	1	19.8376	NA	19.5015	19.3197	NA	NA	20.3543	19.8303	18.7859	NA	19.1339	19.7783	21.0848	NA	NA	19.3078	20.4468	19.7088	18.259	NA	NA	NA	NA	NA	NA	NA	NA	NA	20.4215	NA	NA	NA	NA	NA	21.6354	20.2953	20.9428	NA	NA	NA	NA	NA	NA	NA	NA	NA
P21619	10	Lmnb2	1	18.4192	NA	NA	NA	NA	NA	NA	NA	NA	NA	NA	NA	NA	NA	NA	NA	NA	NA	NA	NA	NA	NA	NA	NA	NA	NA	NA	NA	18.7017	18.2536	NA	NA	NA	NA	18.7082	19.1618	19.3674	NA	NA	NA	NA	NA	NA	NA	NA	NA
Q5XJV6	12	Lmtk3	0.9941	22.559	20.1753	20.0196	20.0537	NA	NA	20.3969	20.6159	19.9433	18.8412	NA	NA	NA	NA	NA	NA	NA	NA	NA	NA	NA	NA	NA	NA	NA	NA	NA	NA	20.6847	20.7992	19.1183	NA	NA	20.6187	19.9177	21.4995	21.0387	NA	NA	NA	NA	NA	NA	NA	NA	NA
Q8BFW7	16	Lpp	1	19.2551	18.6933	18.1382	18.3295	NA	NA	NA	18.6032	19.2842	20.302	20.5518	19.053	NA	20.0081	NA	18.9355	18.8724	20.1631	20.7451	NA	18.4518	18.9288	19.492	NA	18.3035	18.772	20.3378	19.4176	20.6709	NA	20.7296	NA	NA	20.0121	20.5658	19.9084	20.8907	20.0336	18.7181	19.3938	NA	NA	19.3747	20.1471	20.0801	20.934
Q80TG9	7	Lrfn2	0.9973	20.1671	NA	NA	NA	NA	NA	NA	NA	NA	NA	NA	NA	NA	NA	NA	NA	NA	NA	NA	NA	NA	NA	NA	NA	NA	NA	NA	NA	NA	NA	NA	NA	NA	NA	NA	NA	NA	19.436	20.2811	20.5633	18.9465	19.271	20.3346	20.2823	19.5249	19.4265
Q8K2F8	10	Lsm14a	1	19.0496	18.7642	19.2051	19.0456	NA	NA	NA	NA	18.3135	19.1495	19.6856	18.8124	NA	NA	NA	18.84	NA	18.4732	17.989	NA	18.3003	19.0291	18.6912	NA	19.6454	19.0911	18.5986	18.5403	18.6636	18.6375	18.4732	NA	NA	19.0888	18.7195	19.4853	19.3523	NA	NA	NA	NA	NA	NA	NA	NA	NA
P62322	11	Lsm5	1	20.0926	NA	NA	NA	NA	NA	NA	NA	NA	NA	19.4315	19.241	NA	19.6999	19.7598	19.3124	18.4569	19.5534	18.9815	NA	NA	NA	NA	NA	NA	NA	NA	NA	NA	NA	NA	NA	NA	NA	NA	NA	NA	18.8291	18.5811	18.8861	NA	NA	19.6411	19.3106	19.8452	19.3605
Q6ZWM4	37	Lsm8	1	21.3927	21.4601	21.8935	21.406	NA	NA	20.788	21.7476	21.5957	21.6803	21.7723	21.7004	NA	NA	NA	NA	22.7027	21.1307	NA	21.4215	21.8439	21.2085	20.7927	NA	21.6502	20.9236	20.9851	21.2233	21.9952	NA	NA	NA	NA	21.2837	20.9366	20.4974	20.9342	21.5585	NA	21.3623	NA	NA	21.9168	21.521	21.585	NA
P24527	48	Lta4h	1	21.4447	21.3417	21.3939	22.4543	NA	NA	NA	22.5352	21.6841	21.966	NA	21.055	NA	NA	NA	21.675	22.2188	NA	NA	NA	21.2775	21.5577	NA	NA	NA	21.6609	NA	NA	NA	21.198	NA	NA	NA	NA	20.739	21.1331	NA	NA	NA	NA	NA	NA	NA	NA	NA	NA
Q9CYI4	16	Luc7l	1	19.7621	20.0392	19.6418	NA	NA	NA	NA	20.3274	20.0777	19.9761	NA	NA	NA	NA	NA	NA	NA	NA	NA	20.2459	19.8668	NA	20.0375	NA	NA	19.4654	20.5636	20.2623	NA	19.3152	19.5845	NA	NA	NA	19.2507	19.8326	19.625	NA	NA	19.9062	NA	NA	20.9524	19.8868	20.2431	19.9548
Q5SUF2	30	Luc7l3	1	20.1141	20.4817	20.3526	19.6577	NA	NA	19.6683	20.2112	20.533	19.5772	20.6789	19.8808	NA	20.2581	NA	NA	NA	20.2202	20.4975	NA	20.0168	20.7253	NA	NA	NA	19.8867	20.9825	20.8409	20.8615	20.5193	20.2635	NA	NA	20.2139	21.1127	20.6254	20.6016	21.2091	20.8428	20.7915	NA	NA	20.3458	20.2097	20.8332	20.8969
P70202	31	Lxn	1	21.5604	NA	19.5782	20.3027	NA	NA	NA	NA	19.5529	20.8611	20.4166	19.7165	NA	NA	NA	19.7572	NA	20.4266	20.4185	NA	NA	NA	NA	NA	NA	18.9707	19.9661	20.2622	20.389	20.1321	NA	NA	NA	NA	NA	20.6422	20.2116	NA	19.297	21.3092	NA	NA	NA	20.162	NA	21.0339
A2AJI0	16	Map7d1	1	20.0499	NA	NA	NA	NA	NA	NA	NA	NA	NA	20.3501	20.783	NA	20.8496	NA	21.5232	NA	20.8707	21.8287	20.9104	20.2583	21.0129	NA	20.57	21.2717	21.3233	20.432	20.3412	20.1729	20.8025	21.6098	NA	NA	21.1652	20.8745	20.5439	20.084	20.5534	19.7694	21.4872	NA	NA	20.6188	19.7661	20.5326	20.7389
Q63844	14	Mapk3	1	19.3641	NA	NA	NA	NA	NA	NA	NA	NA	NA	20.2838	20.9604	20.7264	18.9519	19.3808	19.723	20.2112	19.8674	20.0907	20.2783	20.9649	20.8071	NA	NA	19.9259	NA	19.2616	20.0104	NA	NA	NA	NA	NA	NA	NA	NA	NA	NA	NA	NA	NA	NA	NA	NA	NA	NA
Q68FL6	20	Mars1	1	19.7754	20.2335	20.0483	19.9496	NA	NA	19.809	19.8678	20.375	20.004	20.35	20.2183	NA	19.8258	19.9084	19.3225	20.7205	20.8362	20.1193	NA	NA	NA	NA	NA	NA	NA	NA	NA	20.2053	19.8217	19.8541	NA	NA	NA	NA	20.0345	19.9734	20.6168	NA	19.8996	NA	NA	NA	20.3504	20.0206	20.3921
Q8C181	11	Mbnl2	1	18.3462	18.398	16.8213	18.4891	NA	NA	NA	20.2361	17.7755	18.3443	18.8318	NA	NA	19.7923	NA	19.4171	19.6824	18.526	NA	NA	NA	NA	NA	NA	NA	NA	NA	NA	NA	NA	NA	NA	NA	NA	NA	NA	NA	NA	NA	NA	NA	NA	NA	NA	NA	NA
Q8K5B2	28	Mcfd2	1	21.6709	NA	NA	20.4272	NA	NA	NA	20.8692	20.9078	NA	NA	19.7607	NA	NA	NA	20.2768	NA	20.0259	20.1237	21.0603	NA	NA	NA	NA	NA	22.4779	20.5233	20.1291	NA	NA	NA	NA	NA	NA	20.7657	20.4569	21.178	20.7819	20.3875	20.04	NA	NA	20.1686	20.523	20.5616	20.0898
Q99KE1	20	Me2	1	21.3882	NA	NA	NA	NA	NA	NA	NA	NA	NA	21.0075	20.6281	NA	NA	NA	NA	20.8646	NA	NA	NA	NA	20.8614	NA	NA	21.8755	20.0955	20.7245	21.3747	22.8069	20.7972	21.9177	NA	21.7192	22.0662	21.9428	21.5831	21.3362	23.6015	21.5217	21.5296	NA	NA	22.1535	22.162	22.054	21.7514
Q9DCS3	13	Mecr	1	19.2063	NA	NA	NA	NA	NA	NA	NA	NA	NA	NA	NA	NA	NA	NA	NA	NA	NA	NA	19.8082	19.7231	19.3223	NA	NA	19.8544	19.4426	20.1689	19.3596	19.586	19.8336	19.4903	NA	NA	NA	19.6571	19.0608	19.083	NA	NA	NA	NA	NA	NA	NA	NA	NA
Q8BP48	14	Metap1	1	19.6238	20.2025	19.9536	19.6321	NA	NA	19.7288	19.788	19.9116	20.3538	NA	20.0908	NA	20.2849	NA	20.2361	19.8375	19.756	20.1103	NA	19.5588	19.6649	NA	NA	20.7611	21.454	19.7981	20.2376	19.8124	19.5707	20.0588	20.2053	NA	19.5931	20.2542	20.1088	19.8928	20.1496	20.485	20.1831	NA	NA	20.8365	20.6016	20.7425	20.8912
P21956	12	Mfge8	1	18.703	18.435	18.1393	19.0515	NA	NA	19.0324	17.913	NA	17.7492	18.075	18.9014	19.7271	18.5313	18.8316	19.1211	18.7646	17.0772	17.9839	NA	NA	NA	NA	NA	NA	NA	NA	NA	18.5215	18.618	NA	NA	NA	18.1414	18.842	18.8479	19.1768	NA	NA	NA	NA	NA	NA	NA	NA	NA
Q80UM7	13	Mogs	1	19.0291	19.4408	18.1977	19.2249	NA	NA	19.5982	19.2039	19.6034	19.4697	NA	NA	NA	NA	NA	NA	NA	NA	NA	19.8107	18.989	19.4605	20.0142	NA	19.4244	19.0644	19.6383	19.3176	NA	NA	NA	NA	NA	NA	NA	NA	NA	19.4584	18.7806	19.6344	NA	NA	19.754	NA	18.9506	NA
P03930	17	Mtatp8	1	21.3617	NA	NA	NA	NA	NA	NA	NA	21.0216	21.7527	21.061	20.9959	NA	NA	NA	21.5197	NA	21.5067	21.3787	NA	NA	20.7249	NA	NA	20.6346	20.7968	21.2512	20.8105	NA	NA	NA	NA	NA	NA	NA	NA	NA	NA	NA	NA	NA	NA	NA	NA	NA	NA
Q791V5	12	Mtch2	1	19.3595	NA	20.8187	NA	NA	NA	NA	NA	NA	NA	NA	NA	NA	NA	NA	NA	NA	NA	NA	NA	NA	NA	NA	NA	NA	NA	NA	NA	NA	NA	NA	NA	NA	NA	NA	NA	NA	NA	NA	NA	NA	NA	NA	NA	NA	NA
P18155	14	Mthfd2	1	19.6499	NA	NA	NA	NA	NA	NA	NA	NA	NA	20.0052	NA	NA	NA	NA	19.9743	NA	19.2404	20.1045	NA	NA	NA	NA	NA	NA	NA	NA	NA	NA	NA	NA	NA	NA	20.3624	21.2224	19.8851	19.9985	NA	NA	NA	NA	NA	NA	NA	NA	NA
Q9CZH7	14	Mxra7	1	19.1302	NA	19.2399	NA	NA	NA	19.9855	19.9525	NA	NA	NA	NA	NA	NA	NA	NA	NA	NA	NA	NA	NA	NA	NA	NA	NA	NA	20.0039	NA	NA	NA	NA	NA	NA	NA	NA	NA	NA	NA	NA	19.9724	NA	NA	NA	NA	NA	20.0075
Q9JK81	33	Myg1	1	21.0117	NA	20.7299	NA	NA	NA	21.8672	21.5602	20.9104	NA	20.4135	20.8354	21.0408	NA	20.7969	22.2198	21.4156	20.4494	20.7799	NA	22.4129	20.069	NA	NA	20.2355	22.135	21.3702	21.1416	21.105	21.356	22.3061	NA	21.8489	21.683	21.3271	21.226	21.56	20.685	21.1276	21.9906	NA	NA	21.8783	21.1772	19.86	20.4289
Q9JMH9	14	Myo18a	1	18.5169	NA	NA	NA	NA	NA	NA	NA	NA	NA	NA	NA	NA	NA	NA	NA	NA	NA	NA	NA	19.3127	19.7632	NA	NA	19.5322	19.1309	19.1134	19.3428	19.1004	18.65	NA	NA	NA	19.3929	19.1719	19.7913	19.3859	19.9266	19.3675	19.8688	NA	19.0992	19.2656	19.479	20.0219	19.5774
Q80UM3	22	Naa15	1	20.0307	20.4824	20.636	NA	NA	NA	19.9908	20.35	19.3649	20.736	20.6517	20.8266	NA	NA	NA	20.7963	20.748	20.5161	20.1648	NA	NA	20.5523	NA	NA	20.7471	NA	20.493	NA	20.2951	21.2139	20.3885	NA	NA	21.3309	20.2885	20.7638	20.3034	20.3127	NA	20.5266	NA	NA	20.593	NA	19.982	20.6791
Q9QWR8	16	Naga	1	19.886	19.2627	19.6353	20.9425	NA	NA	19.4984	20.8417	20.4117	19.8582	20.1157	19.8143	NA	NA	NA	20.1125	NA	19.7783	NA	19.7543	NA	18.9955	NA	NA	NA	20.6365	19.1762	20.1825	19.9856	19.4686	19.7117	20.6854	NA	20.123	20.7025	20.1662	18.9245	NA	NA	NA	NA	NA	NA	NA	NA	NA
Q99KQ4	42	Nampt	1	21.3699	22.1188	20.7995	20.8162	NA	NA	20.8107	22.0562	20.801	20.8142	21.3231	21.3084	21.8008	NA	NA	22.2659	21.5368	20.1692	20.9377	NA	21.922	21.6911	NA	21.6164	22.9242	21.6537	20.6493	21.0849	19.9878	21.169	21.2841	NA	NA	20.9393	21.8089	20.3232	20.119	NA	20.1228	20.6424	NA	NA	NA	19.9999	20.1735	19.1723
Q8K4Z3	24	Naxe	1	20.537	20.4073	20.7593	19.9816	NA	NA	NA	21.0265	20.6224	NA	NA	NA	NA	NA	NA	NA	20.7093	20.3258	20.7072	NA	21.5963	21.1311	NA	NA	NA	22.4733	20.5436	21.0984	NA	20.7068	NA	NA	NA	20.3559	20.3459	20.6454	19.2181	20.9109	NA	19.9238	NA	NA	NA	NA	20.1768	20.3028
Q8VCM8	21	Ncln	1	20.0174	NA	21.0998	NA	NA	NA	NA	NA	20.8663	NA	NA	20.7161	NA	NA	NA	NA	NA	NA	20.0715	NA	21.7154	21.1462	NA	21.1323	21.6987	21.5267	20.6029	NA	21.0759	20.9562	NA	NA	NA	NA	20.9955	20.5499	NA	20.6428	20.6733	20.4993	NA	NA	21.0466	21.4994	20.6851	20.1245
Q91VD9	12	Ndufs1	1	20.9058	NA	NA	NA	NA	NA	NA	NA	NA	NA	21.113	20.7106	20.6245	20.167	NA	21.2967	20.0461	21.2557	21.9721	21.281	20.9047	21.3905	22.2039	NA	21.3697	21.6612	20.9164	21.5098	NA	NA	NA	NA	NA	NA	NA	NA	NA	21.1587	20.9446	21.3711	NA	NA	21.6967	21.728	21.8942	21.2392
Q9DC70	13	Ndufs7	1	19.3915	19.6608	19.2032	18.2791	NA	NA	NA	18.3156	17.3632	19.3405	NA	NA	NA	NA	NA	NA	NA	NA	NA	19.4263	NA	19.1017	19.6549	NA	18.672	18.5712	19.9436	19.4349	NA	NA	NA	NA	NA	NA	NA	NA	NA	19.3426	19.5276	18.6025	NA	NA	19.1607	19.2561	20.1544	20.0467
P29595	34	Nedd8	1	22.4658	22.1686	22.484	22.7183	NA	NA	22.1548	21.9146	21.9175	22.0695	21.711	21.8858	23.4052	22.414	NA	22.3438	22.2109	21.821	22.0534	22.6047	22.7592	22.4961	NA	22.4478	21.981	22.1553	22.3458	22.0867	22.5101	22.1801	22.603	22.8943	NA	23.0749	22.0342	22.211	22.1778	22.5186	22.1244	22.8736	22.7315	22.7275	22.3571	22.3501	22.4021	22.4556
Q8R1F1	30	Niban2	1	20.1951	20.3964	20.4166	19.8265	NA	NA	NA	20.2316	20.963	21.1083	20.4823	19.894	NA	19.0902	NA	20.123	19.2404	19.8999	19.9097	19.9331	20.2575	20.1236	20.373	NA	20.2865	19.471	20.6805	20.0756	21.3298	19.9486	21.1103	20.1999	NA	20.746	20.3686	20.5656	20.822	20.8773	NA	20.9418	NA	NA	20.6518	21.1815	21.0072	21.8899
Q61941	48	Nnt	1	20.8918	21.0986	21.0242	20.8715	NA	NA	20.9916	22.2493	20.3061	21.9736	21.2096	21.3001	NA	NA	NA	21.0587	21.4069	21.3349	21.278	NA	NA	21.6801	NA	21.8443	21.256	21.9558	21.9112	21.4789	22.8131	21.0709	21.2291	NA	21.2409	NA	21.7388	22.1497	22.1055	21.226	NA	21.3361	NA	NA	21.3078	NA	21.5098	21.8419
Q11011	23	Npepps	1	19.754	NA	21.3788	NA	NA	NA	NA	NA	NA	21.1962	19.907	19.8681	NA	20.6655	20.7508	20.6089	20.403	20.6951	19.2901	20.6319	19.9114	19.2327	NA	21.0989	20.7636	21.7919	20.0786	20.5812	19.3854	19.8986	19.0196	NA	NA	19.8367	19.653	19.9964	19.4838	NA	NA	NA	NA	NA	NA	NA	NA	NA
P60670	12	Nploc4	1	18.596	NA	19.645	18.8394	NA	NA	20.3263	19.8983	18.6949	19.3823	NA	NA	NA	NA	NA	NA	NA	NA	NA	NA	NA	NA	NA	NA	NA	NA	NA	NA	17.7001	18.596	18.5238	NA	NA	18.584	NA	18.162	18.7281	18.7136	18.1696	19.4731	NA	NA	19.2186	20.8346	19.0162	18.2975
P46460	16	Nsf	1	19.6239	NA	NA	NA	NA	NA	NA	NA	NA	NA	20.0318	19.4438	NA	NA	NA	19.2567	18.5136	18.762	20.4154	NA	NA	NA	NA	NA	NA	NA	NA	NA	19.2133	20.0653	19.9311	NA	NA	19.3878	19.9126	19.8746	19.3826	19.2538	19.2863	19.422	NA	NA	18.6621	18.651	19.6573	19.5542
P54729	13	Nub1	1	19.4504	NA	20.1718	NA	NA	NA	NA	20.8648	NA	20.4144	NA	20.7919	NA	NA	NA	NA	NA	19.6617	19.7999	NA	NA	NA	NA	NA	NA	NA	NA	NA	20.4944	20.7416	20.4975	NA	NA	20.5594	20.8014	20.9887	20.2146	20.2517	20.4134	20.6524	20.396	NA	20.2459	20.5134	20.2259	19.8786
Q6PIP5	10	Nudcd1	1	18.969	18.9813	19.9704	20.4895	NA	NA	NA	22.8463	19.5988	NA	NA	18.8867	20.842	20.9199	NA	NA	22.7739	19.0508	18.9536	NA	NA	NA	NA	NA	NA	NA	NA	NA	19.0189	18.2854	NA	NA	NA	19.5465	17.9833	19.0883	17.3941	NA	NA	NA	NA	NA	NA	NA	NA	NA
Q99P88	22	Nup155	1	19.8399	NA	20.1083	NA	NA	NA	19.9065	NA	20.7411	20.3022	20.6632	20.1117	NA	21.3383	NA	20.6452	NA	20.8977	NA	20.472	20.1701	19.552	NA	NA	20.8012	19.6234	19.8496	20.1843	21.3522	21.0749	21.4877	NA	NA	20.5849	19.8891	20.6063	19.8435	20.8349	20.3302	20.3169	NA	NA	19.6413	20.1836	20.3757	20.37
Q63850	9	Nup62	1	19.0197	19.1819	19.4304	19.3619	NA	NA	NA	19.4535	18.9345	18.8978	NA	NA	NA	NA	NA	NA	NA	NA	NA	NA	NA	NA	NA	NA	NA	NA	NA	NA	18.3989	19.2451	18.8021	20.2368	NA	20.1736	20.0665	19.6926	20.2981	20.2655	20.0168	19.4906	19.3908	19.02	18.9945	19.4388	19.5202	19.3342
Q8BJ71	15	Nup93	1	18.9407	18.7671	19.6779	19.6529	NA	NA	19.1807	19.5623	19.1703	18.7282	19.0709	18.4925	NA	NA	NA	NA	NA	18.5824	18.7692	NA	NA	NA	NA	NA	NA	NA	NA	NA	NA	NA	NA	NA	NA	NA	NA	NA	NA	19.5934	19.4743	19.667	19.6854	NA	19.6629	19.4209	18.7522	19.1661
P97346	18	Nxn	1	19.1525	20.0127	18.9431	18.7846	NA	NA	19.4431	19.2853	19.5843	18.7538	NA	19.5392	NA	NA	NA	NA	20.063	20.256	19.6053	NA	20.1829	20.4472	NA	NA	NA	19.9189	19.9508	19.7417	20.6713	NA	20.653	NA	NA	20.5194	20.3481	19.5099	19.8203	19.3198	NA	18.4757	NA	NA	18.862	19.6111	18.6723	18.7404
Q9EQQ9	11	Oga	1	18.7127	NA	NA	NA	NA	NA	NA	NA	NA	NA	18.7376	NA	NA	NA	NA	NA	NA	17.7352	NA	NA	18.5821	18.2115	NA	NA	18.3334	18.0069	18.6156	18.067	18.0293	NA	18.8675	NA	NA	18.6975	NA	18.7083	18.2804	NA	NA	NA	NA	NA	NA	NA	NA	NA
Q3B7Z2	14	Osbp	1	19.9296	19.2307	18.7538	18.8944	NA	NA	20.0512	NA	19.5408	19.4526	20.1152	19.1604	NA	NA	NA	19.8079	NA	NA	19.8877	NA	NA	NA	NA	NA	NA	NA	19.9452	NA	19.6421	NA	NA	NA	NA	NA	20.2445	19.9294	NA	NA	19.8576	19.4655	NA	NA	20.4826	19.5317	19.7414	19.7324
Q62422	15	Ostf1	1	19.5681	21.0328	21.0476	21.683	NA	NA	NA	21.4426	20.8101	19.9722	NA	NA	NA	NA	NA	NA	NA	NA	NA	NA	19.4115	20.518	19.8162	NA	19.6514	18.7055	18.9042	19.3025	NA	NA	NA	NA	NA	NA	NA	NA	NA	19.4408	19.3138	19.7347	NA	NA	18.2619	19.3511	19.0422	18.8382
Q8CCS6	28	Pabpn1	1	20.4847	19.8677	19.4304	19.4057	NA	NA	NA	19.152	20.1366	20.546	20.4753	20.9447	NA	20.7506	NA	19.9255	19.9625	20.5249	20.219	NA	20.6215	20.1817	NA	NA	20.1582	20.2277	19.4916	20.3276	19.3244	19.9934	19.9869	NA	NA	20.5093	20.105	19.8427	19.1806	20.5986	20.0387	20.7854	NA	NA	20.7894	20.1865	20.3163	20.7192
Q61205	20	Pafah1b3	1	19.6239	19.3739	19.5702	19.9956	NA	NA	19.4973	20.239	20.2586	NA	19.6866	19.4131	NA	NA	NA	19.9569	19.2901	19.1664	19.5359	19.613	18.8734	19.9711	NA	NA	20.1936	20.013	19.696	19.8568	19.0164	19.7176	19.8651	NA	NA	20.0691	19.9122	18.0964	19.0651	19.2743	20.089	19.9475	NA	NA	20.1213	20.2114	19.4914	19.7159
O54931	27	Pakap	1	20.9793	21.4289	21.3708	21.0613	NA	NA	21.2413	20.7272	21.0097	21.344	21.9966	NA	NA	NA	NA	NA	NA	NA	NA	NA	22.0455	NA	NA	NA	NA	NA	21.026	22.1666	22.047	NA	NA	NA	NA	22.0584	NA	21.9106	21.9782	NA	NA	NA	NA	NA	NA	NA	NA	21.5736
P11103	40	Parp1	1	20.9328	21.6883	21.7777	21.5745	NA	NA	22.1762	22.4609	22.2539	22.1713	20.7782	21.432	NA	NA	NA	21.6868	NA	21.4249	21.5982	NA	21.16	21.46	NA	NA	21.2391	21.3208	21.0258	21.0378	20.9035	21.0847	20.7291	NA	NA	21.1437	21.2132	21.9197	21.8891	NA	20.5324	NA	NA	NA	22.7136	21.3671	NA	20.5116
Q9D0B6	24	Pbdc1	1	19.9039	20.5837	20.8931	NA	NA	NA	20.5366	20.7574	20.3318	NA	20.1633	20.612	NA	NA	NA	NA	NA	NA	NA	NA	NA	NA	NA	NA	NA	NA	NA	NA	NA	NA	NA	NA	NA	NA	NA	19.8212	20.4183	NA	21.2918	20.2751	NA	NA	NA	21.0673	20.9487	20.8018
P23506	19	Pcmt1	1	20.2268	NA	NA	NA	NA	NA	NA	NA	NA	NA	NA	NA	NA	NA	NA	NA	NA	NA	NA	NA	21.6909	NA	20.9169	NA	21.0768	21.1014	20.4313	20.8455	NA	19.4914	NA	NA	NA	20.6063	19.3839	18.4349	19.2786	NA	NA	NA	NA	NA	NA	NA	NA	NA
P56812	25	Pdcd5	1	20.8506	NA	20.7988	NA	NA	NA	22.1447	21.6534	NA	NA	20.7878	20.9832	NA	NA	NA	20.6677	20.9155	20.6066	20.4287	NA	21.7178	21.2976	20.9936	NA	21.9449	20.373	20.9396	19.4985	21.2426	22.0309	21.5154	NA	NA	21.8459	21.3223	21.9418	21.9854	21.6536	21.0955	21.7009	21.7906	NA	21.1938	21.5322	21.5234	21.1577
Q9DBD5	13	Pelp1	1	19.02	21.1512	19.0193	20.4067	NA	NA	19.9872	21.8049	20.3708	NA	19.3428	NA	20.4905	NA	20.3898	19.6838	20.2353	NA	20.5424	NA	NA	NA	NA	NA	NA	NA	NA	NA	19.4461	NA	NA	NA	NA	NA	NA	18.46	19.0102	19.5776	19.8153	19.7709	20.5404	19.9352	20.3457	21.0757	18.7347	19.2046
O70591	17	Pfdn2	1	20.6507	20.2805	NA	20.1994	NA	NA	NA	NA	19.8591	20.6689	20.0762	20.6066	NA	NA	NA	19.968	20.3043	20.1397	20.1123	20.6359	20.3742	21.1257	20.7352	NA	20.6362	NA	20.3481	19.9383	20.0312	21.737	21.8886	NA	NA	20.7421	20.9081	19.7733	20.0287	20.8749	20.1274	20.9737	NA	NA	20.3605	19.7027	20.1665	19.8903
Q03958	32	Pfdn6	1	20.7266	21.525	20.0454	20.5538	NA	NA	20.8061	21.0054	21.9953	21.4338	NA	20.994	NA	NA	NA	21.7808	21.4541	20.9372	NA	20.6848	20.6076	21.5416	21.1757	20.9787	21.1709	21.1224	20.2461	21.0892	NA	21.1356	20.8771	NA	NA	21.2874	NA	19.6735	21.9542	21.3924	21.2704	22.0816	20.9671	20.932	21.6249	21.3448	21.1822	21.4256
P47857	26	Pfkm	1	20.6348	21.2004	21.0016	NA	NA	NA	NA	21.1856	21.2727	20.5865	19.2637	20.0136	20.7546	22.5064	20.6193	21.1287	23.4444	20.7233	20.3274	NA	20.0521	20.5681	NA	NA	20.7332	21.1137	20.7665	21.1111	21.1041	20.7518	20.8763	NA	20.664	20.7045	21.6295	20.7529	20.64	NA	20.4838	20.5732	NA	NA	20.5316	21.1562	20.3105	20.715
Q9WUA3	46	Pfkp	1	20.8801	20.8798	21.0061	21.6155	NA	NA	21.7936	21.6013	21.7075	21.54	20.9893	21.5589	NA	20.3979	20.2751	21.7641	21.8782	21.5654	20.3609	NA	21.8677	21.3109	NA	NA	21.8899	21.6233	20.9412	20.8356	21.942	22.4071	23.1622	NA	22.0371	22.1105	22.0464	21.2647	21.1774	NA	NA	21.9717	NA	NA	NA	NA	21.319	NA
O55022	19	Pgrmc1	1	21.068	19.771	20.936	20.353	NA	NA	20.1416	20.38	20.6827	20.3365	NA	NA	NA	NA	NA	NA	NA	20.4722	NA	NA	NA	NA	NA	NA	NA	NA	NA	NA	NA	NA	NA	NA	NA	NA	NA	NA	NA	NA	NA	NA	NA	NA	NA	NA	NA	NA
Q9DAK9	44	Phpt1	1	22.396	22.0311	20.9188	21.8489	NA	NA	NA	20.4849	22.0568	20.8339	21.5958	21.9003	NA	NA	NA	22.6909	23.0932	22.6047	22.5724	NA	21.3	NA	NA	NA	NA	21.2911	20.9805	21.2999	21.3203	NA	22.5629	NA	NA	NA	NA	21.7587	20.7056	22.2895	22.1804	22.1549	23.3182	22.6399	22.61	20.9151	22.2032	21.9813
Q9QUR7	16	Pin1	1	20.883	21.1276	21.9273	20.4139	NA	NA	20.7172	22.2558	21.2657	21.3982	22.0348	22.1885	NA	NA	NA	21.3979	20.7608	22.1776	22.3335	20.437	21.3595	21.2789	NA	NA	21.3039	20.9688	20.5189	21.2816	20.0853	19.0975	20.6245	NA	NA	21.0114	NA	20.2243	21.569	20.2874	20.7808	20.7321	NA	NA	20.9191	20.6702	20.9638	20.4601
P53810	22	Pitpna	1	20.9829	21.0362	NA	20.7259	NA	NA	21.5543	20.7467	20.7534	NA	NA	NA	NA	NA	NA	NA	NA	NA	NA	NA	21.3878	22.2324	21.8584	21.9384	21.8165	21.6028	22.1224	21.1143	20.9859	21.2113	NA	NA	NA	22.006	21.2707	21.0152	20.5349	20.9698	21.8202	20.5618	NA	21.5069	21.254	20.5365	20.4868	20.4379
P53811	39	Pitpnb	1	20.7542	20.416	19.9467	20.2769	NA	NA	NA	20.4392	20.6177	20.2881	NA	NA	NA	NA	NA	NA	NA	NA	NA	20.6976	19.8851	19.9777	21.3099	20.757	20.6304	20.7185	21.0233	20.5058	20.2161	21.196	20.9077	NA	22.0982	20.0223	20.283	20.5447	20.0739	21.1926	20.4237	20.3188	21.368	21.9205	20.4731	20.5635	21.1174	20.251
Q9D3P8	9	Plgrkt	1	18.8287	NA	NA	NA	NA	NA	NA	NA	NA	NA	19.7378	19.1938	NA	NA	NA	19.5639	19.9489	19.0776	19.0077	NA	NA	NA	NA	NA	NA	NA	NA	NA	NA	NA	NA	NA	NA	NA	NA	NA	NA	19.5638	NA	19.3437	NA	NA	19.3762	19.4093	19.1771	18.9999
Q99K51	26	Pls3	1	19.7444	19.7222	20.2075	19.5603	NA	NA	19.7697	NA	20.2447	19.6947	20.1108	20.3187	NA	NA	NA	NA	20.6578	20.1359	20.5145	20.3608	20.6893	19.981	NA	NA	20.6692	19.2742	19.9647	19.2658	20.8989	20.3777	20.6883	NA	NA	21.0228	20.7807	20.763	20.7258	NA	NA	NA	NA	NA	NA	NA	NA	NA
Q60953	33	Pml	1	20.704	NA	NA	NA	NA	NA	NA	NA	NA	NA	NA	21.4679	NA	NA	NA	NA	NA	NA	NA	NA	NA	NA	NA	NA	NA	NA	NA	NA	21.367	21.1538	22.9587	NA	NA	21.9417	22.3762	21.8319	21.8265	NA	NA	NA	NA	NA	NA	NA	20.1327	NA
O35691	12	Pnn	0.9978	18.378	NA	19.3993	NA	NA	NA	18.8158	NA	18.1598	NA	NA	NA	NA	NA	NA	NA	NA	NA	NA	NA	NA	NA	NA	NA	NA	NA	NA	NA	NA	NA	NA	NA	NA	NA	NA	NA	NA	19.7046	19.0905	18.71	NA	NA	18.334	19.5138	19.3123	19.0235
P23492	39	Pnp	1	22.4438	23.7378	23.9546	23.748	NA	NA	24.5259	24.6535	23.7127	21.852	21.8053	21.6224	NA	NA	NA	21.9967	21.6315	21.0774	21.9259	22.9283	22.8771	22.2553	NA	NA	NA	22.4896	22.2055	21.479	NA	NA	24.0835	24.4085	NA	23.6942	23.7305	22.5173	NA	NA	NA	23.9192	NA	23.7995	23.7063	NA	23.29	NA
Q923G2	12	Polr2h	1	19.7309	20.6386	20.3343	19.8826	NA	NA	19.7746	20.3951	20.8356	18.9756	NA	NA	NA	NA	NA	NA	NA	NA	NA	NA	NA	NA	NA	NA	NA	NA	NA	NA	NA	NA	NA	NA	NA	NA	NA	NA	NA	NA	NA	NA	NA	NA	NA	NA	NA	NA
P37040	27	Por	1	20.2378	19.8515	20.2505	20.7646	NA	NA	20.4752	20.3572	20.4634	20.6675	21.3938	20.8582	NA	NA	20.4196	20.1325	20.0707	20.0965	20.2949	20.9523	NA	21.043	NA	NA	NA	20.3398	21.0687	NA	20.3588	NA	NA	NA	NA	NA	NA	19.8764	20.3897	NA	NA	NA	NA	NA	NA	NA	NA	NA
P30412	22	Ppic	1	20.3432	21.546	19.8267	20.4428	NA	NA	21.0774	20.7468	19.9738	20.5066	20.3672	20.3865	20.3814	20.1759	20.6666	20.0548	NA	20.04	20.4453	20.6265	20.8918	20.9489	NA	NA	20.6482	20.5828	19.6816	NA	20.9413	20.7552	21.403	NA	NA	20.4447	19.9595	20.3105	21.0523	20.4929	20.6612	20.6366	NA	NA	20.2059	20.5677	20.7426	20.9138
P62141	18	Ppp1cb	1	20.4226	20.4268	20.1617	21.0305	NA	NA	NA	21.2399	20.7836	20.0311	NA	NA	NA	NA	NA	NA	NA	NA	NA	20.4945	NA	19.7893	NA	NA	NA	19.9943	20.1826	20.7806	NA	NA	NA	NA	NA	NA	NA	NA	NA	NA	NA	NA	NA	NA	NA	NA	NA	NA
Q8BG95	9	Ppp1r12b	0.9993	17.7639	NA	NA	NA	NA	NA	NA	NA	NA	NA	NA	NA	NA	NA	NA	NA	NA	NA	NA	NA	NA	NA	NA	NA	NA	NA	NA	NA	NA	NA	NA	NA	NA	NA	NA	NA	NA	NA	NA	NA	NA	NA	NA	NA	NA	NA
Q9DCL8	10	Ppp1r2	1	18.2106	17.8462	17.248	17.1072	NA	NA	17.5718	17.0162	18.2868	17.4542	17.1494	17.851	NA	NA	NA	17.8146	17.6227	17.8573	18.6624	NA	17.4693	17.1835	17.4238	NA	17.9256	17.7103	17.5398	18.2023	18.1607	18.3981	17.1949	NA	NA	18.4128	17.7006	18.5484	18.2158	NA	NA	NA	NA	NA	NA	NA	NA	NA
Q6P1F6	11	Ppp2r2a	1	18.6247	NA	NA	NA	NA	NA	NA	NA	NA	NA	19.7767	19.7704	20.1125	NA	19.6403	20.3872	19.4078	20.2277	19.4637	NA	19.6494	19.4962	NA	19.4264	19.793	19.6843	18.8175	18.6458	19.5651	20.4166	20.1816	NA	19.913	19.5561	20.0973	19.6315	18.4649	NA	NA	NA	NA	NA	NA	NA	NA	NA
[truncated: 1,006 more rows]
[truncated: 172 more columns]
