# Supplementary material
Source: Royal Society of Chemistry journal article supplement (doi:10.1039/d5lc01008j)
Supplement: d5lc01008j2.xlsx [file d5lc01008j2.xlsx]

## Sheet: Supplmentary file 3
scRNA-seq data attributes for C10 and SVEC single cells processed using nanoSPINS workflow
Array	Row	Column	BC_ID	Cell Barcode	Cell type	Condition	sample	Annotation	Type	Exon	Intron	Intergenic	Ambiguity	Unmapped	Total	Ratio_mapped	UMI_count	gene_count	QC passed	% mitochondrial reads	Common with Proteomics samples
1	3	1	oligodT_3	CGACCTTAAT	C10	nanoPOTS	SB22_12_PNNL_21	C10_A1_1	nanoPOTS	110241	12764	15521	7604	132127	278257	52.52	10178	3503	Passed	3.34899	C10_A1_1
1	1	1	oligodT_1	TAACTTGGTC	C10	nanoPOTS	SB22_12_PNNL_21	C10_A1_3	nanoPOTS	82873	9891	9672	6178	28550	137164	79.19	6675	2914	Passed	4.55204	C10_A1_3
1	1	3	oligodT_25	TTACTTCGTG	C10	nanoPOTS	SB22_12_PNNL_21	C10_A1_4	nanoPOTS	102796	8067	11220	6288	119052	247423	51.88	7809	3059	Passed	3.78852	C10_A1_4
1	3	6	oligodT_63	CTCCGCCATA	C10	nanoPOTS	SB22_12_PNNL_21	C10_A2_1	nanoPOTS	225755	23110	27847	14704	100598	392014	74.34	17826	4681	Passed	2.87131	C10_A2_1
1	1	6	oligodT_61	AACTCTCTAC	C10	nanoPOTS	SB22_12_PNNL_21	C10_A2_3	nanoPOTS	133442	12130	15599	7871	103396	272438	62.05	9872	3723	Passed	4.16339	C10_A2_3
1	1	8	oligodT_85	GCCAACAGAC	C10	nanoPOTS	SB22_12_PNNL_21	C10_A2_4	nanoPOTS	81306	5607	9491	4904	59798	161106	62.88	6278	2329	Passed	4.73846	C10_A2_4
2	3	6	oligodT_159	GAAGCAAGCG	C10	nanoPOTS	SB22_12_PNNL_21	C10_A4_1	nanoPOTS	187781	24262	25232	12547	143352	393174	63.54	17467	5023	Passed	1.74802	C10_A4_1
2	1	6	oligodT_157	GCCGTGAACA	C10	nanoPOTS	SB22_12_PNNL_21	C10_A4_3	nanoPOTS	108644	7889	11013	6918	92816	227280	59.16	8711	2953	Passed	4.38898	C10_A4_3
2	1	8	oligodT_181	ATCCTAGAAC	C10	nanoPOTS	SB22_12_PNNL_21	C10_A4_4	nanoPOTS	150006	12565	15285	7351	147322	332529	55.7	10944	3736	Passed	4.0695	C10_A4_4
3	3	6	oligodT_255	TATACGATGC	C10	nanoPOTS	SB22_12_PNNL_21	C10_A6_1	nanoPOTS	354315	45651	55934	28901	76628	561429	86.35	33514	7453	Passed	1.48696	C10_A6_1
3	1	6	oligodT_253	GATAGATCAG	C10	nanoPOTS	SB22_12_PNNL_21	C10_A6_3	nanoPOTS	94313	8707	10024	5059	50856	168959	69.9	7200	2661	Passed	7.53852	C10_A6_3
3	1	8	oligodT_277	CAGACTGCAG	C10	nanoPOTS	SB22_12_PNNL_21	C10_A6_4	nanoPOTS	240103	28741	31668	8530	203479	512521	60.3	19310	4903	Passed	3.67347	C10_A6_4
4	3	1	oligodT_291	CGGATTGATC	C10	nanoPOTS	SB22_12_PNNL_21	C10_A7_1	nanoPOTS	198505	18763	24139	15186	42014	298607	85.93	17373	4531	Passed	2.95319	C10_A7_1
4	3	6	oligodT_351	GCAACCTGAG	C10	nanoPOTS	SB22_12_PNNL_21	C10_A8_1	nanoPOTS	41315	13879	6332	3549	43718	108793	59.82	4130	1772	Passed	14.945	C10_A8_1
4	1	6	oligodT_349	GACAATGCGG	C10	nanoPOTS	SB22_12_PNNL_21	C10_A8_3	nanoPOTS	295055	25740	37406	15089	320218	693508	53.83	23073	5570	Passed	4.19636	C10_A8_3
4	1	8	oligodT_373	GTCTTCTCGA	C10	nanoPOTS	SB22_12_PNNL_21	C10_A8_4	nanoPOTS	77526	15599	7771	5789	86602	193287	55.2	5898	1971	Passed	14.6173	C10_A8_4
1	5	1	oligodT_5	CAGCAGGTCA	C10	nanoPOTS	SB22_12_PNNL_21	C10_B1_3	nanoPOTS	45473	4178	5130	2977	24124	81882	70.54	3556	1887	Passed	3.80531	C10_B1_3
1	7	6	oligodT_67	CTCTATTGAG	C10	nanoPOTS	SB22_12_PNNL_21	C10_B2_1	nanoPOTS	100391	8870	11993	7102	78465	206821	62.06	8518	2933	Passed	2.56711	C10_B2_1
1	5	6	oligodT_65	GTGCTCTAGG	C10	nanoPOTS	SB22_12_PNNL_21	C10_B2_3	nanoPOTS	275151	28339	31047	21458	150690	506685	70.26	25707	6204	Passed	1.46743	C10_B2_3
1	5	8	oligodT_89	CCAGTCGTCA	C10	nanoPOTS	SB22_12_PNNL_21	C10_B2_4	nanoPOTS	76820	6906	8164	5290	60085	157265	61.79	9475	3099	Passed	3.03069	C10_B2_4
2	7	1	oligodT_103	CGTGTATGTC	C10	nanoPOTS	SB22_12_PNNL_21	C10_B3_1	nanoPOTS	64471	14749	9317	8511	49285	146333	66.32	5832	2640	Passed	8.00203	C10_B3_1
2	5	1	oligodT_101	TAGAAGATCG	C10	nanoPOTS	SB22_12_PNNL_21	C10_B3_3	nanoPOTS	229678	24314	31239	15713	64189	365133	82.42	20662	5524	Passed	2.68505	C10_B3_3
2	5	3	oligodT_125	ACAACACACA	C10	nanoPOTS	SB22_12_PNNL_21	C10_B3_4	nanoPOTS	182372	15738	23082	13727	168270	403189	58.27	14038	4535	Passed	3.87388	C10_B3_4
2	7	6	oligodT_163	TCAATCTAGC	C10	nanoPOTS	SB22_12_PNNL_21	C10_B4_1	nanoPOTS	68737	5789	9808	4932	27381	116647	76.53	6779	2364	Passed	5.38404	C10_B4_1
3	5	3	oligodT_221	GTGACACGTC	C10	nanoPOTS	SB22_12_PNNL_21	C10_B5_4	nanoPOTS	120204	12535	13509	9564	88295	244107	63.83	10996	3531	Passed	2.13448	C10_B5_4
3	5	6	oligodT_257	GATTGGCGAT	C10	nanoPOTS	SB22_12_PNNL_21	C10_B6_3	nanoPOTS	44092	5810	5512	4573	20352	80339	74.67	3489	1573	Passed	14.443	C10_B6_3
3	5	8	oligodT_281	CTAGACGAGC	C10	nanoPOTS	SB22_12_PNNL_21	C10_B6_4	nanoPOTS	114287	8561	12270	8307	40796	184221	77.85	9317	3057	Passed	4.47584	C10_B6_4
4	7	1	oligodT_295	ACTTAGATCG	C10	nanoPOTS	SB22_12_PNNL_21	C10_B7_1	nanoPOTS	105911	8437	10801	8794	100558	234501	57.12	9076	3194	Passed	2.45924	C10_B7_1
4	5	1	oligodT_293	ACAAGAACCT	C10	nanoPOTS	SB22_12_PNNL_21	C10_B7_3	nanoPOTS	379909	36988	41820	32297	222492	713506	68.82	32378	6960	Passed	2.06419	C10_B7_3
4	5	3	oligodT_317	AACATAAGGC	C10	nanoPOTS	SB22_12_PNNL_21	C10_B7_4	nanoPOTS	270504	37833	43866	20972	233252	606427	61.54	27900	6691	Passed	1.27263	C10_B7_4
4	7	6	oligodT_355	AACAGTGACT	C10	nanoPOTS	SB22_12_PNNL_21	C10_B8_1	nanoPOTS	110163	12158	14368	9615	63698	210002	69.67	9562	3571	Passed	3.13621	C10_B8_1
4	5	6	oligodT_353	CACACTGTTG	C10	nanoPOTS	SB22_12_PNNL_21	C10_B8_3	nanoPOTS	106261	9849	13633	6492	125674	261909	52.02	10143	3277	Passed	2.58495	C10_B8_3
4	5	8	oligodT_377	CGTGGCAGAA	C10	nanoPOTS	SB22_12_PNNL_21	C10_B8_4	nanoPOTS	95156	10337	12350	6222	25527	149592	82.94	8698	3195	Passed	3.573	C10_B8_4
1	9	3	oligodT_33	TCGACGGCAA	C10	nanoPOTS	SB22_12_PNNL_21	C10_C1_4	nanoPOTS	203786	23721	28416	14139	80673	350735	77	18995	5408	Passed	1.62278	C10_C1_4
1	11	6	oligodT_71	ATGACAGCAC	C10	nanoPOTS	SB22_12_PNNL_21	C10_C2_1	nanoPOTS	201352	12586	16734	14465	59419	304556	80.49	16356	4257	Passed	2.21987	C10_C2_1
1	9	8	oligodT_93	CGGAACACAA	C10	nanoPOTS	SB22_12_PNNL_21	C10_C2_4	nanoPOTS	100665	16619	11905	8270	77979	215438	63.8	7550	3210	Passed	4.81313	C10_C2_4
2	11	1	oligodT_107	AATAGACTGC	C10	nanoPOTS	SB22_12_PNNL_21	C10_C3_1	nanoPOTS	120056	10534	13079	9063	27203	179935	84.88	11338	3974	Passed	2.147	C10_C3_1
2	9	1	oligodT_105	CTCACCAGTT	C10	nanoPOTS	SB22_12_PNNL_21	C10_C3_3	nanoPOTS	102309	8377	12402	7670	70507	201265	64.97	10166	2923	Passed	3.19689	C10_C3_3
2	9	3	oligodT_129	GCGAAGTAGG	C10	nanoPOTS	SB22_12_PNNL_21	C10_C3_4	nanoPOTS	62893	6234	7840	4813	25082	106862	76.53	5962	2576	Passed	3.86816	C10_C3_4
2	11	6	oligodT_167	AGAGCAGTAT	C10	nanoPOTS	SB22_12_PNNL_21	C10_C4_1	nanoPOTS	244990	33721	38210	24004	155977	496902	68.61	26544	6508	Passed	1.16999	C10_C4_1
2	9	6	oligodT_165	GATGCTAGAA	C10	nanoPOTS	SB22_12_PNNL_21	C10_C4_3	nanoPOTS	157229	11904	15461	13133	32569	230296	85.86	13406	3867	Passed	2.56274	C10_C4_3
2	9	8	oligodT_189	ATGGTTGTTG	C10	nanoPOTS	SB22_12_PNNL_21	C10_C4_4	nanoPOTS	162536	14491	19078	12883	189733	398721	52.41	14398	4402	Passed	2.52597	C10_C4_4
3	9	1	oligodT_201	TCTGACTATG	C10	nanoPOTS	SB22_12_PNNL_21	C10_C5_3	nanoPOTS	201902	17935	25318	16955	120105	382215	68.58	16650	4589	Passed	2.23718	C10_C5_3
3	11	6	oligodT_263	TCTACAGCTA	C10	nanoPOTS	SB22_12_PNNL_21	C10_C6_1	nanoPOTS	276834	35125	31701	19700	137672	501032	72.52	21697	5917	Passed	2.03233	C10_C6_1
4	11	1	oligodT_299	CGTCTAGTAA	C10	nanoPOTS	SB22_12_PNNL_21	C10_C7_1	nanoPOTS	77615	13112	9852	8447	35103	144129	75.64	6691	2961	Passed	5.49915	C10_C7_1
4	9	3	oligodT_321	CATTGAGCTA	C10	nanoPOTS	SB22_12_PNNL_21	C10_C7_4	nanoPOTS	96899	19977	12875	13551	66553	209855	68.29	7617	3111	Passed	7.61227	C10_C7_4
4	9	8	oligodT_381	AATCCAGGAT	C10	nanoPOTS	SB22_12_PNNL_21	C10_C8_4	nanoPOTS	37741	9760	5293	2821	25496	81111	68.57	3072	1513	Passed	15	C10_C8_4
1	3	2	oligodT_15	GAACCGCATT	SVEC	nanoPOTS	SB22_12_PNNL_21	SVEC_A1_1	nanoPOTS	167797	74120	37120	11594	281110	571741	50.83	19839	6577	Passed	1.26839	SVEC_A1_1
1	2	1	oligodT_2	ATAAGCGGAG	SVEC	nanoPOTS	SB22_12_PNNL_21	SVEC_A1_2	nanoPOTS	55924	10014	6761	3987	70129	146815	52.23	5227	2587	Passed	2.57523	SVEC_A1_2
1	2	3	oligodT_26	ATTCGGCTTA	SVEC	nanoPOTS	SB22_12_PNNL_21	SVEC_A1_3	nanoPOTS	23757	10945	4129	1377	39685	79893	50.33	2666	1571	Passed	10.6892	SVEC_A1_3
1	3	7	oligodT_75	AACGAAGATC	SVEC	nanoPOTS	SB22_12_PNNL_21	SVEC_A2_1	nanoPOTS	136511	25456	20540	12764	107884	303155	64.41	12792	4671	Passed	2.62716	SVEC_A2_1
1	2	8	oligodT_86	CCTCGTTGGA	SVEC	nanoPOTS	SB22_12_PNNL_21	SVEC_A2_3	nanoPOTS	84874	11829	10937	6278	55322	169240	67.31	7501	3222	Passed	2.79861	SVEC_A2_3
1	1	7	oligodT_73	GTATGCCACA	SVEC	nanoPOTS	SB22_12_PNNL_21	SVEC_A2_4	nanoPOTS	30011	5939	5662	1996	33542	77150	56.52	3538	1984	Passed	3.35089	SVEC_A2_4
2	3	7	oligodT_171	AGTCAGATGC	SVEC	nanoPOTS	SB22_12_PNNL_21	SVEC_A4_1	nanoPOTS	50584	7013	7487	3419	38551	107054	63.99	5281	2374	Passed	3.72954	SVEC_A4_1
2	2	6	oligodT_158	AGGAGACCAC	SVEC	nanoPOTS	SB22_12_PNNL_21	SVEC_A4_2	nanoPOTS	67540	11746	10900	5037	70795	166018	57.36	9192	3346	Passed	2.74856	SVEC_A4_2
3	2	3	oligodT_218	AAGGTGTACT	SVEC	nanoPOTS	SB22_12_PNNL_21	SVEC_A5_3	nanoPOTS	37994	9079	7714	2111	54260	111158	51.19	4719	2393	Passed	2.29476	SVEC_A5_3
3	3	7	oligodT_267	GCGACAATAT	SVEC	nanoPOTS	SB22_12_PNNL_21	SVEC_A6_1	nanoPOTS	172913	22407	17405	12653	113561	338939	66.5	14988	5055	Passed	3.70004	SVEC_A6_1
3	2	6	oligodT_254	GCAGAAGTCT	SVEC	nanoPOTS	SB22_12_PNNL_21	SVEC_A6_2	nanoPOTS	84341	15057	15542	7621	87287	209848	58.4	10506	3942	Passed	1.97159	SVEC_A6_2
3	2	8	oligodT_278	GTTAGTGCCT	SVEC	nanoPOTS	SB22_12_PNNL_21	SVEC_A6_3	nanoPOTS	70138	10273	10924	5382	61626	158343	61.08	7776	3340	Passed	2.26837	SVEC_A6_3
3	1	7	oligodT_265	CGCACATTAC	SVEC	nanoPOTS	SB22_12_PNNL_21	SVEC_A6_4	nanoPOTS	59289	11040	11365	4507	24716	110917	77.72	6283	2677	Passed	2.04659	SVEC_A6_4
4	3	2	oligodT_303	CACGAGAAGT	SVEC	nanoPOTS	SB22_12_PNNL_21	SVEC_A7_1	nanoPOTS	84963	12727	13314	5079	59774	175857	66.01	9071	3171	Passed	2.27752	SVEC_A7_1
4	2	1	oligodT_290	GTAGGCCGTT	SVEC	nanoPOTS	SB22_12_PNNL_21	SVEC_A7_2	nanoPOTS	101811	17038	13956	6405	75016	214226	64.98	10606	3934	Passed	2.04452	SVEC_A7_2
4	2	3	oligodT_314	AGGCTGGAGA	SVEC	nanoPOTS	SB22_12_PNNL_21	SVEC_A7_3	nanoPOTS	83912	13710	12792	4707	71025	186146	61.84	8897	3460	Passed	3.14113	SVEC_A7_3
4	1	2	oligodT_301	TCGACGTTGG	SVEC	nanoPOTS	SB22_12_PNNL_21	SVEC_A7_4	nanoPOTS	137161	24480	20693	7782	108734	298850	63.62	12446	4328	Passed	2.42516	SVEC_A7_4
4	3	7	oligodT_363	ATGGTGTATC	SVEC	nanoPOTS	SB22_12_PNNL_21	SVEC_A8_1	nanoPOTS	49005	6258	7637	4053	38727	105680	63.35	5183	2498	Passed	1.73767	SVEC_A8_1
4	2	6	oligodT_350	AAGTGGCATT	SVEC	nanoPOTS	SB22_12_PNNL_21	SVEC_A8_2	nanoPOTS	84374	24358	21456	5004	99572	234764	57.59	10855	4318	Passed	2.52495	SVEC_A8_2
4	2	8	oligodT_374	ATACACAGAG	SVEC	nanoPOTS	SB22_12_PNNL_21	SVEC_A8_3	nanoPOTS	67572	11611	8999	4098	65124	157404	58.63	6228	2765	Passed	2.6178	SVEC_A8_3
4	1	7	oligodT_361	GTGCTATCGA	SVEC	nanoPOTS	SB22_12_PNNL_21	SVEC_A8_4	nanoPOTS	48396	8884	9748	3878	38550	109456	64.78	5363	2581	Passed	2.66889	SVEC_A8_4
1	7	2	oligodT_19	TCGCGACACT	SVEC	nanoPOTS	SB22_12_PNNL_21	SVEC_B1_1	nanoPOTS	63998	14977	13881	4451	55675	152982	63.61	7983	3351	Passed	2.15421	SVEC_B1_1
1	6	1	oligodT_6	TCTAGCTGCG	SVEC	nanoPOTS	SB22_12_PNNL_21	SVEC_B1_2	nanoPOTS	75521	15818	11484	3303	62494	168620	62.94	6726	2965	Passed	2.0438	SVEC_B1_2
1	6	3	oligodT_30	GCCAGCTATC	SVEC	nanoPOTS	SB22_12_PNNL_21	SVEC_B1_3	nanoPOTS	72299	9044	8988	5547	62058	157936	60.71	7185	2948	Passed	2.21974	SVEC_B1_3
1	5	2	oligodT_17	TTACGCGCAT	SVEC	nanoPOTS	SB22_12_PNNL_21	SVEC_B1_4	nanoPOTS	61628	10901	9207	4660	59171	145567	59.35	6125	2819	Passed	3.21144	SVEC_B1_4
1	7	7	oligodT_79	CCGAACAGAG	SVEC	nanoPOTS	SB22_12_PNNL_21	SVEC_B2_1	nanoPOTS	107872	21732	19017	9339	58013	215973	73.14	10780	4175	Passed	1.24031	SVEC_B2_1
1	6	6	oligodT_66	GCAATCTGCT	SVEC	nanoPOTS	SB22_12_PNNL_21	SVEC_B2_2	nanoPOTS	34484	6404	5331	3215	26530	75964	65.08	3441	1915	Passed	4.1043	SVEC_B2_2
1	6	8	oligodT_90	AGAAGACCTA	SVEC	nanoPOTS	SB22_12_PNNL_21	SVEC_B2_3	nanoPOTS	42559	8833	8284	4994	43955	108625	59.54	5546	2662	Passed	2.23625	SVEC_B2_3
1	5	7	oligodT_77	TAGGCGAATG	SVEC	nanoPOTS	SB22_12_PNNL_21	SVEC_B2_4	nanoPOTS	79693	26856	30662	6293	30744	174248	82.36	11211	4714	Passed	0.955076	SVEC_B2_4
2	7	2	oligodT_115	CATCACCTAA	SVEC	nanoPOTS	SB22_12_PNNL_21	SVEC_B3_1	nanoPOTS	138872	18932	17096	9657	64308	248865	74.16	11480	4377	Passed	2.16687	SVEC_B3_1
2	6	1	oligodT_102	AACCTAGTGC	SVEC	nanoPOTS	SB22_12_PNNL_21	SVEC_B3_2	nanoPOTS	30795	7175	6183	2404	30678	77235	60.28	3489	1904	Passed	3.30386	SVEC_B3_2
2	6	3	oligodT_126	AAGAGCTCGC	SVEC	nanoPOTS	SB22_12_PNNL_21	SVEC_B3_3	nanoPOTS	56783	13509	13236	5856	30221	119605	74.73	7652	3363	Passed	1.8383	SVEC_B3_3
2	6	6	oligodT_162	TCGTGACGAC	SVEC	nanoPOTS	SB22_12_PNNL_21	SVEC_B4_2	nanoPOTS	57161	9105	9060	4348	75753	155427	51.26	6722	2750	Passed	1.82002	SVEC_B4_2
2	6	8	oligodT_186	ATAGGCAGTG	SVEC	nanoPOTS	SB22_12_PNNL_21	SVEC_B4_3	nanoPOTS	52098	6073	7286	3933	67137	136527	50.83	5596	2462	Passed	2.58557	SVEC_B4_3
2	5	7	oligodT_173	CTTAGTACGC	SVEC	nanoPOTS	SB22_12_PNNL_21	SVEC_B4_4	nanoPOTS	181422	34210	32979	14843	82227	345681	76.21	17981	5755	Passed	1.59005	SVEC_B4_4
3	7	2	oligodT_211	CCATCACGTG	SVEC	nanoPOTS	SB22_12_PNNL_21	SVEC_B5_1	nanoPOTS	229670	31529	23771	21775	63517	370262	82.85	17196	5359	Passed	1.73961	SVEC_B5_1
3	6	3	oligodT_222	AATGGACGCG	SVEC	nanoPOTS	SB22_12_PNNL_21	SVEC_B5_3	nanoPOTS	83993	9106	9637	7320	39008	149064	73.83	7717	3243	Passed	1.48481	SVEC_B5_3
3	5	2	oligodT_209	TGTCAGGCTT	SVEC	nanoPOTS	SB22_12_PNNL_21	SVEC_B5_4	nanoPOTS	52213	15351	12965	6253	35578	122360	70.92	6947	3282	Passed	1.52076	SVEC_B5_4
3	7	7	oligodT_271	ATAGAGTTCG	SVEC	nanoPOTS	SB22_12_PNNL_21	SVEC_B6_1	nanoPOTS	40329	5288	5355	2820	28420	82212	65.43	4305	2127	Passed	2.58353	SVEC_B6_1
3	6	6	oligodT_258	CAAGACGGAC	SVEC	nanoPOTS	SB22_12_PNNL_21	SVEC_B6_2	nanoPOTS	120877	12223	13584	8590	81796	237070	65.5	11028	3884	Passed	1.1762	SVEC_B6_2
3	6	8	oligodT_282	GTAATACTCG	SVEC	nanoPOTS	SB22_12_PNNL_21	SVEC_B6_3	nanoPOTS	89058	13246	11850	7197	48893	170244	71.28	8186	3458	Passed	2.0162	SVEC_B6_3
3	5	7	oligodT_269	GATCCACTTA	SVEC	nanoPOTS	SB22_12_PNNL_21	SVEC_B6_4	nanoPOTS	86873	22720	17788	6715	71484	205580	65.23	10126	4186	Passed	1.61269	SVEC_B6_4
4	7	2	oligodT_307	CTGGAGAATA	SVEC	nanoPOTS	SB22_12_PNNL_21	SVEC_B7_1	nanoPOTS	128547	19214	19440	9332	97184	273717	64.49	12208	4601	Passed	1.21964	SVEC_B7_1
4	5	2	oligodT_305	TTCTACCGGC	SVEC	nanoPOTS	SB22_12_PNNL_21	SVEC_B7_4	nanoPOTS	52690	15690	14399	4775	57960	145514	60.17	8252	3448	Passed	1.58525	SVEC_B7_4
4	6	6	oligodT_354	CTCATTCTGC	SVEC	nanoPOTS	SB22_12_PNNL_21	SVEC_B8_2	nanoPOTS	101140	15716	15356	6881	63232	202325	68.75	9692	3862	Passed	2.51182	SVEC_B8_2
4	5	7	oligodT_365	TATGATGCAG	SVEC	nanoPOTS	SB22_12_PNNL_21	SVEC_B8_4	nanoPOTS	115843	16822	15833	10363	44968	203829	77.94	11289	4153	Passed	2.40189	SVEC_B8_4
1	11	2	oligodT_23	ACCGAATAGA	SVEC	nanoPOTS	SB22_12_PNNL_21	SVEC_C1_1	nanoPOTS	100254	15029	13626	7459	30778	167146	81.59	9190	3784	Passed	1.61407	SVEC_C1_1
1	10	3	oligodT_34	TCAGTTCGAT	SVEC	nanoPOTS	SB22_12_PNNL_21	SVEC_C1_3	nanoPOTS	82179	10501	11777	8570	51956	164983	68.51	7831	3191	Passed	1.93944	SVEC_C1_3
1	9	2	oligodT_21	CCAGACCGAT	SVEC	nanoPOTS	SB22_12_PNNL_21	SVEC_C1_4	nanoPOTS	37660	6336	7366	2256	33836	87454	61.31	4089	2125	Passed	3.125	SVEC_C1_4
1	10	6	oligodT_70	GTTGCATCAA	SVEC	nanoPOTS	SB22_12_PNNL_21	SVEC_C2_2	nanoPOTS	82411	12003	13412	6525	74729	189080	60.48	8424	3638	Passed	1.80529	SVEC_C2_2
1	10	8	oligodT_94	CTATAACGGA	SVEC	nanoPOTS	SB22_12_PNNL_21	SVEC_C2_3	nanoPOTS	83320	9500	9347	8386	70630	181183	61.02	7224	3088	Passed	1.89139	SVEC_C2_3
1	9	7	oligodT_81	GAGCAGCTTG	SVEC	nanoPOTS	SB22_12_PNNL_21	SVEC_C2_4	nanoPOTS	117331	19347	24170	8423	91598	260869	64.89	12758	4661	Passed	2.74498	SVEC_C2_4
2	11	2	oligodT_119	AAGGTGTTAG	SVEC	nanoPOTS	SB22_12_PNNL_21	SVEC_C3_1	nanoPOTS	74842	15063	14747	6895	100569	212116	52.59	8419	3755	Passed	0.883074	SVEC_C3_1
2	10	1	oligodT_106	ACTAGTAGTC	SVEC	nanoPOTS	SB22_12_PNNL_21	SVEC_C3_2	nanoPOTS	246398	44185	42538	20354	161806	515281	68.6	24345	6921	Passed	0.965399	SVEC_C3_2
2	10	3	oligodT_130	GTGAAGACAC	SVEC	nanoPOTS	SB22_12_PNNL_21	SVEC_C3_3	nanoPOTS	87061	12105	15173	7951	54088	176378	69.33	8662	3419	Passed	2.45083	SVEC_C3_3
2	9	2	oligodT_117	CACGAGTGTC	SVEC	nanoPOTS	SB22_12_PNNL_21	SVEC_C3_4	nanoPOTS	91927	11663	11354	6233	59336	180513	67.13	8159	3450	Passed	2.43458	SVEC_C3_4
2	11	7	oligodT_179	CCAGTGCACT	SVEC	nanoPOTS	SB22_12_PNNL_21	SVEC_C4_1	nanoPOTS	72941	7671	9401	5075	48711	143799	66.13	6384	2795	Passed	1.90848	SVEC_C4_1
2	10	8	oligodT_190	ACAATAGCAC	SVEC	nanoPOTS	SB22_12_PNNL_21	SVEC_C4_3	nanoPOTS	42718	8037	10927	2710	38727	103119	62.44	5202	2614	Passed	2.42619	SVEC_C4_3
2	9	7	oligodT_177	TGGTGGTTGT	SVEC	nanoPOTS	SB22_12_PNNL_21	SVEC_C4_4	nanoPOTS	97533	15493	14153	8123	83528	218830	61.83	10017	3983	Passed	2.35738	SVEC_C4_4
3	11	2	oligodT_215	CATATGGTGC	SVEC	nanoPOTS	SB22_12_PNNL_21	SVEC_C5_1	nanoPOTS	124437	13242	14665	9780	50645	212769	76.2	9226	3910	Passed	2.15692	SVEC_C5_1
3	10	3	oligodT_226	AGCGTCTCAT	SVEC	nanoPOTS	SB22_12_PNNL_21	SVEC_C5_3	nanoPOTS	57324	20036	17460	5661	58012	158493	63.4	9100	3984	Passed	1.17805	SVEC_C5_3
3	9	2	oligodT_213	TAAGGCTCAC	SVEC	nanoPOTS	SB22_12_PNNL_21	SVEC_C5_4	nanoPOTS	112462	27301	27726	10072	66780	244341	72.67	14674	5142	Passed	1.63327	SVEC_C5_4
3	10	6	oligodT_262	TGTCGGTGCT	SVEC	nanoPOTS	SB22_12_PNNL_21	SVEC_C6_2	nanoPOTS	124792	18527	20017	9530	114376	287242	60.18	13057	4575	Passed	1.45916	SVEC_C6_2
3	10	8	oligodT_286	CTGAACGTAT	SVEC	nanoPOTS	SB22_12_PNNL_21	SVEC_C6_3	nanoPOTS	42084	3820	5281	3171	36917	91273	59.55	3917	1936	Passed	3.77213	SVEC_C6_3
3	9	7	oligodT_273	AATCGTGCGG	SVEC	nanoPOTS	SB22_12_PNNL_21	SVEC_C6_4	nanoPOTS	137802	19358	19011	12313	38827	227311	82.92	13315	4618	Passed	1.78818	SVEC_C6_4
4	11	2	oligodT_311	ACGGCCTACA	SVEC	nanoPOTS	SB22_12_PNNL_21	SVEC_C7_1	nanoPOTS	78860	12795	13800	5581	98890	209926	52.89	9258	3408	Passed	2.17421	SVEC_C7_1
4	10	1	oligodT_298	TATCATGTCG	SVEC	nanoPOTS	SB22_12_PNNL_21	SVEC_C7_2	nanoPOTS	49409	6136	6386	3754	45615	111300	59.02	5185	2504	Passed	1.94986	SVEC_C7_2
4	9	2	oligodT_309	TGTTCGCTCT	SVEC	nanoPOTS	SB22_12_PNNL_21	SVEC_C7_4	nanoPOTS	93389	13456	15551	6687	65927	195010	66.19	9704	3751	Passed	2.34561	SVEC_C7_4
4	10	6	oligodT_358	GCATAGCCAA	SVEC	nanoPOTS	SB22_12_PNNL_21	SVEC_C8_2	nanoPOTS	37494	5831	6268	2902	38134	90629	57.92	4046	2051	Passed	2.86037	SVEC_C8_2
4	10	8	oligodT_382	AAGGTACCGT	SVEC	nanoPOTS	SB22_12_PNNL_21	SVEC_C8_3	nanoPOTS	67881	9230	9669	5752	31209	123741	74.78	6972	3068	Passed	1.27827	SVEC_C8_3
4	9	7	oligodT_369	TTAAGTGCGT	SVEC	nanoPOTS	SB22_12_PNNL_21	SVEC_C8_4	nanoPOTS	87018	19168	19590	7549	76202	209527	63.63	10425	3956	Passed	1.62831	SVEC_C8_4
1	3	3	oligodT_27	CGCGGTATCT	C10	nanoPOTS	SB22_12_PNNL_21	C10_A1_2	nanoPOTS	132208	12077	15493	7478	56316	223572	74.81	10933	3618	Passed	3.20753
2	3	2	oligodT_111	AGTCCAGCGT	SVEC	nanoPOTS	SB22_12_PNNL_21	SVEC_A3_1	nanoPOTS	194820	35648	30559	15731	194602	471360	58.71	20446	5878	Passed	1.20316
2	2	1	oligodT_98	TTCCTTGAGG	SVEC	nanoPOTS	SB22_12_PNNL_21	SVEC_A3_2	nanoPOTS	67365	15155	12486	4419	45948	145373	68.39	6762	2994	Passed	1.7641
2	1	2	oligodT_109	TAGGAAGCGG	SVEC	nanoPOTS	SB22_12_PNNL_21	SVEC_A3_4	nanoPOTS	42182	12496	6960	1913	61503	125054	50.82	4323	2345	Passed	4.31328
1	3	8	oligodT_87	AATAGGTAGG	C10	nanoPOTS	SB22_12_PNNL_21	C10_A2_2	nanoPOTS	103070	8994	14110	8570	99477	234221	57.53	9960	3295	Passed	3.1497
2	3	1	oligodT_99	GAGTCGCTTC	C10	nanoPOTS	SB22_12_PNNL_21	C10_A3_1	nanoPOTS	39240	5635	4950	3243	10962	64030	82.88	7692	3206	Passed	6.15493
2	3	3	oligodT_123	CGAGATTAGA	C10	nanoPOTS	SB22_12_PNNL_21	C10_A3_2	nanoPOTS	135059	10554	13286	10070	112395	281364	60.05	11194	3521	Passed	3.06199
2	1	1	oligodT_97	GCGCGGTTAA	C10	nanoPOTS	SB22_12_PNNL_21	C10_A3_3	nanoPOTS	62988	5584	6344	3516	30060	108492	72.29	5436	2520	Passed	5.08162
2	1	3	oligodT_121	ACGGTCGCAT	C10	nanoPOTS	SB22_12_PNNL_21	C10_A3_4	nanoPOTS	115209	17216	15902	7436	70354	226117	68.89	11514	3809	Passed	4.95232
2	3	8	oligodT_183	CTTACTCTCT	C10	nanoPOTS	SB22_12_PNNL_21	C10_A4_2	nanoPOTS	197501	19169	22343	15754	67333	322100	79.1	15033	4389	Passed	4.85723
3	3	8	oligodT_279	CGCAATAAGA	C10	nanoPOTS	SB22_12_PNNL_21	C10_A6_2	nanoPOTS	142844	15162	15156	9646	41003	223811	81.68	10584	3558	Passed	3.88634
4	3	8	oligodT_375	AGGTCTATGG	C10	nanoPOTS	SB22_12_PNNL_21	C10_A8_2	nanoPOTS	187043	24612	35015	15773	53689	316132	83.02	19972	5839	Passed	2.15386
1	7	3	oligodT_31	CTTACGAACT	C10	nanoPOTS	SB22_12_PNNL_21	C10_B1_2	nanoPOTS	369891	65096	76180	27687	93266	632120	85.25	33703	7709	Passed	1.94429
3	7	8	oligodT_283	GATTCTTAGC	C10	nanoPOTS	SB22_12_PNNL_21	C10_B6_2	nanoPOTS	120310	9598	12586	9341	146005	297840	50.98	10701	3591	Passed	2.08549
4	7	3	oligodT_319	AACCGGCCTT	C10	nanoPOTS	SB22_12_PNNL_21	C10_B7_2	nanoPOTS	118084	8396	13088	9529	31133	180230	82.73	10813	3327	Passed	3.77464
1	11	3	oligodT_35	CTAACCTCAA	C10	nanoPOTS	SB22_12_PNNL_21	C10_C1_2	nanoPOTS	66139	18709	14098	4441	66617	170004	60.81	6820	3015	Passed	12.5623
2	11	3	oligodT_131	GACTTAGGTC	C10	nanoPOTS	SB22_12_PNNL_21	C10_C3_2	nanoPOTS	43271	20931	8102	6562	23618	102484	76.95	4174	2007	Passed	8.7994
2	11	8	oligodT_191	CTACAAGTTC	C10	nanoPOTS	SB22_12_PNNL_21	C10_C4_2	nanoPOTS	60267	7130	8348	4846	57756	138347	58.25	5936	2808	Passed	2.46139
3	11	3	oligodT_227	CTCTATACTG	C10	nanoPOTS	SB22_12_PNNL_21	C10_C5_2	nanoPOTS	246837	19457	26679	18811	175305	487089	64.01	18059	5406	Passed	2.7364
3	11	8	oligodT_287	CACTAGACTT	C10	nanoPOTS	SB22_12_PNNL_21	C10_C6_2	nanoPOTS	38795	14374	8804	5458	65291	132722	50.81	3789	1878	Passed	10.8372
4	11	8	oligodT_383	ACGACAATGA	C10	nanoPOTS	SB22_12_PNNL_21	C10_C8_2	nanoPOTS	109505	7381	10934	7031	71579	206430	65.33	7599	2981	Passed	5.25859
3	3	1	oligodT_195	GAGTAGTGAC	C10	nanoPOTS	SB22_12_PNNL_21	C10_A5_1	nanoPOTS	0	0	0	0	0	0	0	0	0	Not passed
3	3	3	oligodT_219	CTTCTAACCG	C10	nanoPOTS	SB22_12_PNNL_21	C10_A5_2	nanoPOTS	242	32	18	21	163	476	65.76	139	120	Not passed
3	1	1	oligodT_193	TAGCGAGGCT	C10	nanoPOTS	SB22_12_PNNL_21	C10_A5_3	nanoPOTS	91	3	0	3	11	108	89.81	26	22	Not passed
3	1	3	oligodT_217	GCATAAGATC	C10	nanoPOTS	SB22_12_PNNL_21	C10_A5_4	nanoPOTS	0	0	0	0	0	0	0	0	0	Not passed
4	3	3	oligodT_315	TAAGCCACGC	C10	nanoPOTS	SB22_12_PNNL_21	C10_A7_2	nanoPOTS	116215	13299	14767	8626	177742	330649	46.24	11392	3204	Not passed
4	1	1	oligodT_289	CAACCATACA	C10	nanoPOTS	SB22_12_PNNL_21	C10_A7_3	nanoPOTS	2397	202	317	112	545	3573	84.75	256	213	Not passed
4	1	3	oligodT_313	AATCGAACTC	C10	nanoPOTS	SB22_12_PNNL_21	C10_A7_4	nanoPOTS	65	22	12	7	97	203	52.22	64	56	Not passed
1	7	1	oligodT_7	AGATTAGCGT	C10	nanoPOTS	SB22_12_PNNL_21	C10_B1_1	nanoPOTS	32223	5770	4861	1830	55828	100512	44.46	3106	1567	Not passed
1	5	3	oligodT_29	AGGATGTCCA	C10	nanoPOTS	SB22_12_PNNL_21	C10_B1_4	nanoPOTS	22362	2457	2455	1538	18445	47257	60.97	2409	1393	Not passed
1	7	8	oligodT_91	CCGTGAGTTC	C10	nanoPOTS	SB22_12_PNNL_21	C10_B2_2	nanoPOTS	30029	4257	3664	2797	28576	69323	58.78	2700	1269	Not passed
2	7	3	oligodT_127	ACAGAGGCGT	C10	nanoPOTS	SB22_12_PNNL_21	C10_B3_2	nanoPOTS	16124	3616	2646	859	16877	40122	57.94	2233	1195	Not passed
2	7	8	oligodT_187	GAATAGAGTG	C10	nanoPOTS	SB22_12_PNNL_21	C10_B4_2	nanoPOTS	63675	6675	8445	4973	220921	304689	27.49	6842	2747	Not passed
2	5	6	oligodT_161	TTCGCGGACT	C10	nanoPOTS	SB22_12_PNNL_21	C10_B4_3	nanoPOTS	44806	7683	4726	4378	21409	83002	74.21	3496	1457	Not passed
2	5	8	oligodT_185	GATCTGTATG	C10	nanoPOTS	SB22_12_PNNL_21	C10_B4_4	nanoPOTS	43102	6803	5122	2622	67032	124681	46.24	3669	1752	Not passed
3	7	1	oligodT_199	CTCTTCAGCA	C10	nanoPOTS	SB22_12_PNNL_21	C10_B5_1	nanoPOTS	416	147	65	66	195	889	78.07	210	168	Not passed
3	7	3	oligodT_223	TCTCCGTACT	C10	nanoPOTS	SB22_12_PNNL_21	C10_B5_2	nanoPOTS	37486	1797	3428	1043	24535	68289	64.07	2944	1090	Not passed
3	5	1	oligodT_197	ATCATACCGC	C10	nanoPOTS	SB22_12_PNNL_21	C10_B5_3	nanoPOTS	330	210	39	45	228	852	73.24	156	134	Not passed
3	7	6	oligodT_259	CCACTCAACG	C10	nanoPOTS	SB22_12_PNNL_21	C10_B6_1	nanoPOTS	68309	24702	10822	4084	185713	293630	36.75	7255	2691	Not passed
4	7	8	oligodT_379	TGATTCCACA	C10	nanoPOTS	SB22_12_PNNL_21	C10_B8_2	nanoPOTS	107140	10322	12012	7342	213755	350571	39.03	11462	3216	Not passed
1	11	1	oligodT_11	TCTCACCAGG	C10	nanoPOTS	SB22_12_PNNL_21	C10_C1_1	nanoPOTS	2521	432	242	125	1164	4484	74.04	550	431	Not passed
1	9	1	oligodT_9	CGCACTTCGT	C10	nanoPOTS	SB22_12_PNNL_21	C10_C1_3	nanoPOTS	11442	1508	1915	1297	8318	24480	66.02	1137	750	Not passed
1	11	8	oligodT_95	AGATGTAAGG	C10	nanoPOTS	SB22_12_PNNL_21	C10_C2_2	nanoPOTS	147705	16184	22556	10899	215461	412805	47.81	14445	4390	Not passed
1	9	6	oligodT_69	TCAGCATCTA	C10	nanoPOTS	SB22_12_PNNL_21	C10_C2_3	nanoPOTS	93471	10355	13691	6938	141268	265723	46.84	8664	3221	Not passed
3	11	1	oligodT_203	AGAAGATTGG	C10	nanoPOTS	SB22_12_PNNL_21	C10_C5_1	nanoPOTS	4798	344	584	331	5693	11750	51.55	609	458	Not passed
3	9	3	oligodT_225	GATAGACAAC	C10	nanoPOTS	SB22_12_PNNL_21	C10_C5_4	nanoPOTS	57860	11188	7445	8129	87908	172530	49.05	4837	2179	Not passed
3	9	6	oligodT_261	GCGAAGAATT	C10	nanoPOTS	SB22_12_PNNL_21	C10_C6_3	nanoPOTS	0	0	0	0	0	0	0	0	0	Not passed
3	9	8	oligodT_285	ATCGAGAGAC	C10	nanoPOTS	SB22_12_PNNL_21	C10_C6_4	nanoPOTS	22445	2141	3107	742	284816	313251	9.08	3558	1077	Not passed
4	11	3	oligodT_323	AACCACACTA	C10	nanoPOTS	SB22_12_PNNL_21	C10_C7_2	nanoPOTS	10266	719	1364	527	36785	49661	25.93	1330	758	Not passed
4	9	1	oligodT_297	ACCTTCGGAC	C10	nanoPOTS	SB22_12_PNNL_21	C10_C7_3	nanoPOTS	10253	970	1519	471	55558	68771	19.21	1660	851	Not passed
4	11	6	oligodT_359	ACGTGCATCG	C10	nanoPOTS	SB22_12_PNNL_21	C10_C8_1	nanoPOTS	87455	10610	13365	5741	171612	288783	40.57	9375	3139	Not passed
4	9	6	oligodT_357	TCAGACTGGT	C10	nanoPOTS	SB22_12_PNNL_21	C10_C8_3	nanoPOTS	142763	12504	18602	11169	240526	425564	43.48	13042	3889	Not passed
1	1	2	oligodT_13	TCGAACACGA	SVEC	nanoPOTS	SB22_12_PNNL_21	SVEC_A1_4	nanoPOTS	71017	7295	9100	5486	169564	262462	35.39	6864	2758	Not passed
1	2	6	oligodT_62	GCCACCTAGT	SVEC	nanoPOTS	SB22_12_PNNL_21	SVEC_A2_2	nanoPOTS	4760	700	908	249	19104	25721	25.73	1214	672	Not passed
2	2	3	oligodT_122	TTACACACGG	SVEC	nanoPOTS	SB22_12_PNNL_21	SVEC_A3_3	nanoPOTS	64	7	4	9	34	118	71.19	48	42	Not passed
2	2	8	oligodT_182	GCCTAGAGTC	SVEC	nanoPOTS	SB22_12_PNNL_21	SVEC_A4_3	nanoPOTS	53144	10183	8867	3605	94569	170368	44.49	6641	2682	Not passed
2	1	7	oligodT_169	TAAGATCGGA	SVEC	nanoPOTS	SB22_12_PNNL_21	SVEC_A4_4	nanoPOTS	48511	8006	8234	3419	121435	189605	35.95	5343	2536	Not passed
3	3	2	oligodT_207	AAGGTCAATG	SVEC	nanoPOTS	SB22_12_PNNL_21	SVEC_A5_1	nanoPOTS	89	19	6	3	54	171	68.42	74	70	Not passed
3	2	1	oligodT_194	CCAACTGTAT	SVEC	nanoPOTS	SB22_12_PNNL_21	SVEC_A5_2	nanoPOTS	99	36	49	42	72	298	75.84	11	10	Not passed
3	1	2	oligodT_205	GCGCCATATA	SVEC	nanoPOTS	SB22_12_PNNL_21	SVEC_A5_4	nanoPOTS	0	0	0	0	0	0	0	0	0	Not passed
2	5	2	oligodT_113	GCGACTCGTA	SVEC	nanoPOTS	SB22_12_PNNL_21	SVEC_B3_4	nanoPOTS	163	75	11	19	74	342	78.36	35	33	Not passed
2	7	7	oligodT_175	ACTTCCGTTC	SVEC	nanoPOTS	SB22_12_PNNL_21	SVEC_B4_1	nanoPOTS	79612	11276	14590	5697	152541	263716	42.16	8812	3352	Not passed
3	6	1	oligodT_198	ATTCGCACTA	SVEC	nanoPOTS	SB22_12_PNNL_21	SVEC_B5_2	nanoPOTS	124	9	4	52	43	232	81.47	39	36	Not passed
4	6	1	oligodT_294	AGAGTATGTG	SVEC	nanoPOTS	SB22_12_PNNL_21	SVEC_B7_2	nanoPOTS	22206	3110	3334	1851	18683	49184	62.01	2279	1350	Not passed
4	6	3	oligodT_318	TTGCAATGCG	SVEC	nanoPOTS	SB22_12_PNNL_21	SVEC_B7_3	nanoPOTS	49269	6691	7139	4015	91826	158940	42.23	4989	2402	Not passed
4	7	7	oligodT_367	AGAGGCACGA	SVEC	nanoPOTS	SB22_12_PNNL_21	SVEC_B8_1	nanoPOTS	44788	8236	7872	3987	69467	134350	48.29	5678	2498	Not passed
4	6	8	oligodT_378	CAACAGGTAG	SVEC	nanoPOTS	SB22_12_PNNL_21	SVEC_B8_3	nanoPOTS	33810	5564	5203	1987	62522	109086	42.69	3329	1715	Not passed
1	10	1	oligodT_10	CTTGCTATTC	SVEC	nanoPOTS	SB22_12_PNNL_21	SVEC_C1_2	nanoPOTS	19571	2873	2868	1447	6763	33522	79.83	1819	1161	Not passed
1	11	7	oligodT_83	GTGTCTACAG	SVEC	nanoPOTS	SB22_12_PNNL_21	SVEC_C2_1	nanoPOTS	33213	6128	3808	1925	80356	125430	35.94	3021	1692	Not passed
2	10	6	oligodT_166	ACGATGGTTA	SVEC	nanoPOTS	SB22_12_PNNL_21	SVEC_C4_2	nanoPOTS	72096	14843	9632	3344	129494	229409	43.55	6538	2727	Not passed
3	10	1	oligodT_202	TGTGACGTAT	SVEC	nanoPOTS	SB22_12_PNNL_21	SVEC_C5_2	nanoPOTS	6609	929	859	575	4826	13798	65.02	906	669	Not passed
3	11	7	oligodT_275	AGCACCAGTC	SVEC	nanoPOTS	SB22_12_PNNL_21	SVEC_C6_1	nanoPOTS	46820	7407	8947	3600	85518	152292	43.85	5520	2516	Not passed
4	10	3	oligodT_322	CTTCGGAATC	SVEC	nanoPOTS	SB22_12_PNNL_21	SVEC_C7_3	nanoPOTS	5759	1195	1373	242	14751	23320	36.75	1196	785	Not passed
4	11	7	oligodT_371	TCCAGCGAAG	SVEC	nanoPOTS	SB22_12_PNNL_21	SVEC_C8_1	nanoPOTS	32291	6407	6241	2293	105003	152235	31.03	4443	2127	Not passed
