# Supplementary material
Source: Royal Society of Chemistry journal article supplement (doi:10.1039/d5lc01008j)
Supplement: d5lc01008j3.xlsx [file d5lc01008j3.xlsx]

## Sheet: Supplementary file 4
scRNA-seq data attributes for directly sorted C10 and SVEC single cells
Array	Row	Column	BC_ID	Cell Barcode	Cell type	Condition	sample	Annotation	Type	Exon	Intron	Intergenic	Ambiguity	Unmapped	Total	Ratio_mapped	UMI_count	gene_count	QC passed	% mitochondrial reads
1	1	4	oligodT_37	ACGAGACGTC	C10	Direct_Sorting	SB22_12_PNNL_21	C10_1_4_1	Direct	823408	213882	130221	72284	255486	1495281	82.91	93149	11062	Passed	0.7528
1	10	4	oligodT_46	AGCAATTCAC	C10	Direct_Sorting	SB22_12_PNNL_21	C10_1_4_10	Direct	223194	94024	48952	17509	81364	465043	82.5	26791	7537	Passed	1.2852
1	11	4	oligodT_47	ATATTCTCGG	C10	Direct_Sorting	SB22_12_PNNL_21	C10_1_4_11	Direct	100	105	37	25	182	449	59.47	119	89	Not passed
1	12	4	oligodT_48	GACTCATCCA	C10	Direct_Sorting	SB22_12_PNNL_21	C10_1_4_12	Direct	301183	87717	44961	21935	71991	527787	86.36	34581	8099	Passed	1.01991
1	2	4	oligodT_38	TATGGCAAGC	C10	Direct_Sorting	SB22_12_PNNL_21	C10_1_4_2	Direct	322144	80505	46287	37687	66170	552793	88.03	32156	6817	Passed	0.698377
1	3	4	oligodT_39	ACTCCGAAGC	C10	Direct_Sorting	SB22_12_PNNL_21	C10_1_4_3	Direct	196	86	43	37	158	520	69.62	174	147	Not passed
1	4	4	oligodT_40	AATCTGCAGT	C10	Direct_Sorting	SB22_12_PNNL_21	C10_1_4_4	Direct	1764	264	295	77	3419	5819	41.24	408	296	Not passed
1	5	4	oligodT_41	AGTTCAGGCG	C10	Direct_Sorting	SB22_12_PNNL_21	C10_1_4_5	Direct	102947	79138	30178	10056	56622	278941	79.7	14133	5236	Passed	0.984465
1	6	4	oligodT_42	CGCCAAGGTA	C10	Direct_Sorting	SB22_12_PNNL_21	C10_1_4_6	Direct	45705	60965	21179	6241	20232	154322	86.89	6998	3350	Passed	0.755509
1	7	4	oligodT_43	CCTGACATCT	C10	Direct_Sorting	SB22_12_PNNL_21	C10_1_4_7	Direct	410031	137815	74427	45312	137077	804662	82.96	37021	9051	Passed	0.691383
1	8	4	oligodT_44	CGAGCGTAGT	C10	Direct_Sorting	SB22_12_PNNL_21	C10_1_4_8	Direct	992239	188013	129638	147363	251510	1708763	85.28	80799	11602	Passed	0.943632
1	9	4	oligodT_45	CTGGATTACT	C10	Direct_Sorting	SB22_12_PNNL_21	C10_1_4_9	Direct	569260	168586	94742	63799	151957	1048344	85.51	50237	10277	Passed	0.68973
1	12	6	oligodT_72	TAGCGACGGA	C10	Direct_Sorting	SB22_12_PNNL_21	C10_1_6_12	Direct	497924	62669	57042	43828	327830	989293	66.86	43322	7747	Passed	1.386
1	4	6	oligodT_64	TGACACGATT	C10	Direct_Sorting	SB22_12_PNNL_21	C10_1_6_4	Direct	351320	203954	86414	31448	266018	939154	71.67	49610	9163	Passed	0.611038
1	8	6	oligodT_68	CACTTACGGC	C10	Direct_Sorting	SB22_12_PNNL_21	C10_1_6_8	Direct	108429	58957	24725	12993	30917	236021	86.9	10813	4598	Passed	0.816427
1	12	8	oligodT_96	ATGCTTACTG	C10	Direct_Sorting	SB22_12_PNNL_21	C10_1_8_12	Direct	309721	68661	44900	51490	111746	586518	80.95	23543	6139	Passed	1.85031
1	4	8	oligodT_88	TATGCGTAGC	C10	Direct_Sorting	SB22_12_PNNL_21	C10_1_8_4	Direct	413336	70260	46788	52442	114019	696845	83.64	35385	7037	Passed	0.779929
1	8	8	oligodT_92	TCAATTCCGA	C10	Direct_Sorting	SB22_12_PNNL_21	C10_1_8_8	Direct	223467	194909	89193	62770	117329	687668	82.94	28966	7722	Passed	2.01967
2	1	4	oligodT_133	CCTATGTGTA	C10	Direct_Sorting	SB22_12_PNNL_21	C10_2_4_1	Direct	338051	121829	73973	21524	109007	664384	83.59	38437	8676	Passed	1.1576
2	10	4	oligodT_142	TAGGTTCAAG	C10	Direct_Sorting	SB22_12_PNNL_21	C10_2_4_10	Direct	248492	46934	31868	37690	69532	434516	84	20541	5724	Passed	1.29714
2	11	4	oligodT_143	AAGACTCTCG	C10	Direct_Sorting	SB22_12_PNNL_21	C10_2_4_11	Direct	228123	26259	31123	20544	34997	341046	89.74	19758	5223	Passed	1.34482
2	12	4	oligodT_144	GAAGATCGAC	C10	Direct_Sorting	SB22_12_PNNL_21	C10_2_4_12	Direct	656380	114834	90139	62166	286559	1210078	76.32	56492	9444	Passed	0.934828
2	2	4	oligodT_134	CAACGTTGAC	C10	Direct_Sorting	SB22_12_PNNL_21	C10_2_4_2	Direct	541003	101355	63228	62123	295931	1063640	72.18	41535	8475	Passed	1.01228
2	3	4	oligodT_135	TGACATAGGT	C10	Direct_Sorting	SB22_12_PNNL_21	C10_2_4_3	Direct	337456	53751	41731	44682	80872	558492	85.52	27756	6462	Passed	1.2205
2	4	4	oligodT_136	TTACACCAAC	C10	Direct_Sorting	SB22_12_PNNL_21	C10_2_4_4	Direct	451416	127296	64348	59279	102104	804443	87.31	51316	7720	Passed	1.02581
2	5	4	oligodT_137	CCTGGAATTA	C10	Direct_Sorting	SB22_12_PNNL_21	C10_2_4_5	Direct	131251	106086	41037	37258	66807	382439	82.53	17705	5780	Passed	2.13491
2	6	4	oligodT_138	GCAACATCAA	C10	Direct_Sorting	SB22_12_PNNL_21	C10_2_4_6	Direct	381641	112282	58066	35506	322993	910488	64.53	41479	7727	Passed	0.675658
2	7	4	oligodT_139	ACAGCCAGGT	C10	Direct_Sorting	SB22_12_PNNL_21	C10_2_4_7	Direct	7961	1287	1587	1026	11105	22966	51.65	1469	840	Not passed
2	8	4	oligodT_140	TAGTCCATCT	C10	Direct_Sorting	SB22_12_PNNL_21	C10_2_4_8	Direct	125313	211277	88926	34464	78402	538382	85.44	30730	8467	Passed	0.4504
2	9	4	oligodT_141	GCCTCTCAGA	C10	Direct_Sorting	SB22_12_PNNL_21	C10_2_4_9	Direct	465538	186783	107137	52199	153166	964823	84.12	56479	10671	Passed	0.870179
2	12	6	oligodT_168	TTGTGATCCT	C10	Direct_Sorting	SB22_12_PNNL_21	C10_2_6_12	Direct	649083	65814	83450	55601	200582	1054530	80.98	48766	8305	Passed	1.93861
2	4	6	oligodT_160	AACGCGACTG	C10	Direct_Sorting	SB22_12_PNNL_21	C10_2_6_4	Direct	190336	184746	82005	31903	135118	624108	78.35	32076	8403	Passed	1.8258
2	8	6	oligodT_164	GCGGAGTCAA	C10	Direct_Sorting	SB22_12_PNNL_21	C10_2_6_8	Direct	217795	115762	50768	38888	95749	518962	81.55	25404	7162	Passed	1.1254
2	12	8	oligodT_192	AACCTGATCT	C10	Direct_Sorting	SB22_12_PNNL_21	C10_2_8_12	Direct	492685	52402	68774	56201	122294	792356	84.57	33745	6861	Passed	1.88462
2	4	8	oligodT_184	CCGACAACCT	C10	Direct_Sorting	SB22_12_PNNL_21	C10_2_8_4	Direct	1527516	415205	275194	126399	285064	2629378	89.16	168537	13217	Not passed
2	8	8	oligodT_188	GTAACAGGAA	C10	Direct_Sorting	SB22_12_PNNL_21	C10_2_8_8	Direct	717340	189652	101810	78338	248029	1335169	81.42	87271	9403	Passed	0.913833
3	1	4	oligodT_229	GTTCTCATCA	C10	Direct_Sorting	SB22_12_PNNL_21	C10_3_4_1	Direct	632421	293514	127285	93263	170296	1316779	87.07	64155	11342	Passed	1.98709
3	10	4	oligodT_238	TAGGTCCAGA	C10	Direct_Sorting	SB22_12_PNNL_21	C10_3_4_10	Direct	371393	81615	68814	51894	154862	728578	78.74	44199	8110	Passed	1.39996
3	11	4	oligodT_239	TAACCTGAAC	C10	Direct_Sorting	SB22_12_PNNL_21	C10_3_4_11	Direct	7318	1164	1200	386	10315	20383	49.39	1134	722	Not passed
3	12	4	oligodT_240	GATAGGTGAA	C10	Direct_Sorting	SB22_12_PNNL_21	C10_3_4_12	Direct	243505	22662	28741	32849	47059	374816	87.44	18575	5077	Passed	0.963719
3	2	4	oligodT_230	CAATGCGTGT	C10	Direct_Sorting	SB22_12_PNNL_21	C10_3_4_2	Direct	150526	166885	60984	45226	84771	508392	83.33	23434	7463	Passed	1.74223
3	3	4	oligodT_231	TGAGTGTACA	C10	Direct_Sorting	SB22_12_PNNL_21	C10_3_4_3	Direct	537612	115764	88797	54787	181509	978469	81.45	51597	8686	Passed	1.32113
3	4	4	oligodT_232	TGCTTCCAAG	C10	Direct_Sorting	SB22_12_PNNL_21	C10_3_4_4	Direct	169376	114017	50163	46507	113670	493733	76.98	21794	6403	Passed	2.72937
3	5	4	oligodT_233	CCTACTCTGC	C10	Direct_Sorting	SB22_12_PNNL_21	C10_3_4_5	Direct	188067	29268	22046	23668	55730	318779	82.52	14750	4636	Passed	1.43564
3	6	4	oligodT_234	TCGCTGAGAG	C10	Direct_Sorting	SB22_12_PNNL_21	C10_3_4_6	Direct	504528	93612	66864	45685	114366	825055	86.14	51111	8359	Passed	0.568661
3	7	4	oligodT_235	CGCTAATTGC	C10	Direct_Sorting	SB22_12_PNNL_21	C10_3_4_7	Direct	477799	130624	89489	68745	150822	917479	83.56	40772	8425	Passed	1.36571
3	8	4	oligodT_236	TCAGCTGTCA	C10	Direct_Sorting	SB22_12_PNNL_21	C10_3_4_8	Direct	320	123	80	27	266	816	67.4	230	153	Not passed
3	9	4	oligodT_237	AGACGACAGA	C10	Direct_Sorting	SB22_12_PNNL_21	C10_3_4_9	Direct	233680	156582	84398	15643	87573	577876	84.85	49489	8821	Passed	0.61876
3	12	6	oligodT_264	CAACCATGAT	C10	Direct_Sorting	SB22_12_PNNL_21	C10_3_6_12	Direct	396545	100128	57509	76927	157420	788529	80.04	27176	6746	Passed	1.85263
3	4	6	oligodT_256	AACGCTCTGA	C10	Direct_Sorting	SB22_12_PNNL_21	C10_3_6_4	Direct	350772	65707	43688	38343	70076	568586	87.68	31857	6474	Passed	0.808053
3	8	6	oligodT_260	AGCCACTCGT	C10	Direct_Sorting	SB22_12_PNNL_21	C10_3_6_8	Direct	268153	114750	62122	22405	192469	659899	70.83	39632	7954	Passed	0.883652
3	12	8	oligodT_288	CGTCGCCTAT	C10	Direct_Sorting	SB22_12_PNNL_21	C10_3_8_12	Direct	75040	56377	21809	23005	61280	237511	74.2	10057	4127	Passed	1.68158
3	4	8	oligodT_280	TCGGTCTGTT	C10	Direct_Sorting	SB22_12_PNNL_21	C10_3_8_4	Direct	223477	76438	43718	25814	137435	506882	72.89	32335	6268	Passed	0.915348
3	8	8	oligodT_284	TGTGATCGCG	C10	Direct_Sorting	SB22_12_PNNL_21	C10_3_8_8	Direct	228387	83914	45532	18745	86812	463390	81.27	32076	6784	Passed	0.990822
4	1	4	oligodT_325	ACTTCAACAG	C10	Direct_Sorting	SB22_12_PNNL_21	C10_4_4_1	Direct	344444	67714	42172	66035	139700	660065	78.84	26638	6889	Passed	1.94945
4	10	4	oligodT_334	CCTCTGTCAT	C10	Direct_Sorting	SB22_12_PNNL_21	C10_4_4_10	Direct	340110	140506	70362	48429	214968	814375	73.6	49027	7174	Passed	1.05252
4	11	4	oligodT_335	GCAGATGTAA	C10	Direct_Sorting	SB22_12_PNNL_21	C10_4_4_11	Direct	240841	98249	51330	25091	127294	542805	76.55	30174	6835	Passed	0.742981
4	12	4	oligodT_336	CTCATCATCT	C10	Direct_Sorting	SB22_12_PNNL_21	C10_4_4_12	Direct	218481	44970	30213	26708	57125	377497	84.87	18999	5320	Passed	1.62014
4	2	4	oligodT_326	TGGACAATAG	C10	Direct_Sorting	SB22_12_PNNL_21	C10_4_4_2	Direct	552045	129352	90882	50472	264152	1086903	75.7	61843	8796	Passed	0.742771
4	3	4	oligodT_327	TCACACGGAT	C10	Direct_Sorting	SB22_12_PNNL_21	C10_4_4_3	Direct	329377	79384	51362	27197	86964	574284	84.86	31924	7492	Passed	1.15298
4	4	4	oligodT_328	AGGATACGGT	C10	Direct_Sorting	SB22_12_PNNL_21	C10_4_4_4	Direct	87227	68444	28498	19751	39309	243229	83.84	13950	4768	Passed	2.33764
4	5	4	oligodT_329	GCTACAGGTC	C10	Direct_Sorting	SB22_12_PNNL_21	C10_4_4_5	Direct	115276	81482	39152	38311	108591	382812	71.63	17289	5400	Passed	1.50184
4	6	4	oligodT_330	GCCAAGTAAC	C10	Direct_Sorting	SB22_12_PNNL_21	C10_4_4_6	Direct	794826	191725	119992	77744	200134	1384421	85.54	75111	10834	Passed	0.592899
4	7	4	oligodT_331	TTGTGAAGGC	C10	Direct_Sorting	SB22_12_PNNL_21	C10_4_4_7	Direct	166462	51064	28219	25680	125936	397361	68.31	17957	5141	Passed	1.52203
4	8	4	oligodT_332	GTCGACTCCT	C10	Direct_Sorting	SB22_12_PNNL_21	C10_4_4_8	Direct	33108	8240	8772	2755	46827	99702	53.03	9165	2290	Passed	1.0705
4	9	4	oligodT_333	CTGAGCTTGT	C10	Direct_Sorting	SB22_12_PNNL_21	C10_4_4_9	Direct	639546	108627	77571	60063	141306	1027113	86.24	57234	9348	Passed	0.905899
4	12	6	oligodT_360	GCGATGCAGA	C10	Direct_Sorting	SB22_12_PNNL_21	C10_4_6_12	Direct	453323	123828	66827	57454	165288	866720	80.93	53924	7768	Passed	0.551653
4	4	6	oligodT_352	AGAACCGGAC	C10	Direct_Sorting	SB22_12_PNNL_21	C10_4_6_4	Direct	376936	233440	128168	31114	123032	892690	86.22	83212	10048	Passed	0.426445
4	8	6	oligodT_356	CCACTTGGAT	C10	Direct_Sorting	SB22_12_PNNL_21	C10_4_6_8	Direct	661552	236664	112881	67543	177341	1255981	85.88	79703	10242	Passed	0.549218
4	12	8	oligodT_384	TGCGTTCTGC	C10	Direct_Sorting	SB22_12_PNNL_21	C10_4_8_12	Direct	440341	94003	69604	40446	207614	852008	75.63	36745	8372	Passed	0.969345
4	4	8	oligodT_376	ACCTCATTGA	C10	Direct_Sorting	SB22_12_PNNL_21	C10_4_8_4	Direct	14086	3610	4405	757	65832	88690	25.77	3935	1370	Not passed
4	8	8	oligodT_380	TAAGGCGATC	C10	Direct_Sorting	SB22_12_PNNL_21	C10_4_8_8	Direct	201154	41905	28465	32105	80910	384539	78.96	17839	5298	Passed	1.66465
1	12	1	oligodT_12	TTCCTCACGT	SVEC	Direct_Sorting	SB22_12_PNNL_21	SVEC_1_1_12	Direct	49185	16641	6958	6437	24167	103388	76.62	4462	2222	Passed	2.4
1	4	1	oligodT_4	ATGTTGCCAC	SVEC	Direct_Sorting	SB22_12_PNNL_21	SVEC_1_1_4	Direct	2736	567	263	173	1620	5359	69.77	234	178	Not passed
1	8	1	oligodT_8	AGGTAACAAC	SVEC	Direct_Sorting	SB22_12_PNNL_21	SVEC_1_1_8	Direct	12006	4452	1489	828	2471	21246	88.37	1263	799	Not passed
1	12	3	oligodT_36	GACCTACTAT	SVEC	Direct_Sorting	SB22_12_PNNL_21	SVEC_1_3_12	Direct	337048	72145	66462	30603	89733	595991	84.94	34299	8136	Passed	0.716108
1	4	3	oligodT_28	TATCCGCGTC	SVEC	Direct_Sorting	SB22_12_PNNL_21	SVEC_1_3_4	Direct	27762	19671	9101	1747	14682	72963	79.88	4066	2380	Passed	0.720644
1	8	3	oligodT_32	CAAGACTCAA	SVEC	Direct_Sorting	SB22_12_PNNL_21	SVEC_1_3_8	Direct	81891	44111	20362	5687	41781	193832	78.44	11425	4296	Passed	1.45829
1	1	5	oligodT_49	CATAAGCGAC	SVEC	Direct_Sorting	SB22_12_PNNL_21	SVEC_1_5_1	Direct	212181	65967	37110	16262	96914	428434	77.38	25648	6094	Passed	1.43472
1	10	5	oligodT_58	CCTCTATAGA	SVEC	Direct_Sorting	SB22_12_PNNL_21	SVEC_1_5_10	Direct	383758	117713	57343	29680	91153	679647	86.59	39754	9174	Passed	1.41176
1	11	5	oligodT_59	TACGCTACTT	SVEC	Direct_Sorting	SB22_12_PNNL_21	SVEC_1_5_11	Direct	398420	79895	50252	31370	92390	652327	85.84	36293	7442	Passed	0.716573
1	12	5	oligodT_60	CGCACTGGTA	SVEC	Direct_Sorting	SB22_12_PNNL_21	SVEC_1_5_12	Direct	278031	46566	45942	22095	68727	461361	85.1	23571	6010	Passed	0.95173
1	2	5	oligodT_50	CCTAAGCTGA	SVEC	Direct_Sorting	SB22_12_PNNL_21	SVEC_1_5_2	Direct	314899	83804	38661	29200	170658	637222	73.22	33221	7184	Passed	0.42679
1	3	5	oligodT_51	CGATGTCTTG	SVEC	Direct_Sorting	SB22_12_PNNL_21	SVEC_1_5_3	Direct	124734	58848	26576	11804	68195	290157	76.5	15896	5598	Passed	0.745566
1	4	5	oligodT_52	GAGATGAGAG	SVEC	Direct_Sorting	SB22_12_PNNL_21	SVEC_1_5_4	Direct	242594	90048	46397	19423	76316	474778	83.93	31658	7628	Passed	0.718447
1	5	5	oligodT_53	TCACCATAAG	SVEC	Direct_Sorting	SB22_12_PNNL_21	SVEC_1_5_5	Direct	108758	38746	18666	10084	24594	200848	87.75	10996	4609	Passed	0.317151
1	6	5	oligodT_54	ACTTCCGGCA	SVEC	Direct_Sorting	SB22_12_PNNL_21	SVEC_1_5_6	Direct	64637	30468	10869	5359	19296	130629	85.23	7198	3350	Passed	0.762287
1	7	5	oligodT_55	AAGCGCTTAG	SVEC	Direct_Sorting	SB22_12_PNNL_21	SVEC_1_5_7	Direct	102467	61588	24751	9203	50906	248915	79.55	13160	4942	Passed	0.448781
1	8	5	oligodT_56	AACAACACAG	SVEC	Direct_Sorting	SB22_12_PNNL_21	SVEC_1_5_8	Direct	135391	40199	18910	10299	31198	235997	86.78	11789	5105	Passed	0.646112
1	9	5	oligodT_57	AGACTAGATG	SVEC	Direct_Sorting	SB22_12_PNNL_21	SVEC_1_5_9	Direct	127513	47056	22607	10317	34388	241881	85.78	16080	5311	Passed	1.02698
2	12	1	oligodT_108	ATGATCAACG	SVEC	Direct_Sorting	SB22_12_PNNL_21	SVEC_2_1_12	Direct	123444	20874	19672	8990	33257	206237	83.87	11472	4386	Passed	0.603487
2	4	1	oligodT_100	GTACGCTCAA	SVEC	Direct_Sorting	SB22_12_PNNL_21	SVEC_2_1_4	Direct	97148	23737	15307	9050	37426	182668	79.51	13249	3379	Passed	1.66128
2	8	1	oligodT_104	TTCAGATCCA	SVEC	Direct_Sorting	SB22_12_PNNL_21	SVEC_2_1_8	Direct	261630	44193	36605	25485	62039	429952	85.57	24198	6524	Passed	0.732303
2	12	3	oligodT_132	AGGACGGACA	SVEC	Direct_Sorting	SB22_12_PNNL_21	SVEC_2_3_12	Direct	115095	28367	17214	8940	49316	218932	77.47	14944	4215	Passed	1.20336
2	4	3	oligodT_124	CAAGGATCGA	SVEC	Direct_Sorting	SB22_12_PNNL_21	SVEC_2_3_4	Direct	118266	140206	51115	12474	197429	519490	62	20348	6912	Passed	1.32013
2	8	3	oligodT_128	AACTGTACGG	SVEC	Direct_Sorting	SB22_12_PNNL_21	SVEC_2_3_8	Direct	142243	56250	23913	13902	55288	291596	81.04	20256	5299	Passed	0.849084
2	1	5	oligodT_145	TTGGATTGTC	SVEC	Direct_Sorting	SB22_12_PNNL_21	SVEC_2_5_1	Direct	178260	47292	28997	13488	70626	338663	79.15	21026	6108	Passed	0.966211
2	10	5	oligodT_154	TTACGGACGC	SVEC	Direct_Sorting	SB22_12_PNNL_21	SVEC_2_5_10	Direct	306566	60526	40317	20881	104515	532805	80.38	31795	7504	Passed	0.726939
2	11	5	oligodT_155	CCAATGTTGA	SVEC	Direct_Sorting	SB22_12_PNNL_21	SVEC_2_5_11	Direct	199532	81011	44547	17321	80893	423304	80.89	27299	6858	Passed	1.01508
2	12	5	oligodT_156	CGTACTTAGA	SVEC	Direct_Sorting	SB22_12_PNNL_21	SVEC_2_5_12	Direct	133640	28417	19012	10007	108500	299576	63.78	14277	4582	Passed	1.3331
2	2	5	oligodT_146	AATTGGCACA	SVEC	Direct_Sorting	SB22_12_PNNL_21	SVEC_2_5_2	Direct	107744	66208	25443	10043	84144	293582	71.34	15019	5797	Passed	1.33197
2	3	5	oligodT_147	AGGCAATCGC	SVEC	Direct_Sorting	SB22_12_PNNL_21	SVEC_2_5_3	Direct	468946	187938	107884	28516	120557	913841	86.81	52128	10028	Passed	0.857565
2	4	5	oligodT_148	TGCAACACTA	SVEC	Direct_Sorting	SB22_12_PNNL_21	SVEC_2_5_4	Direct	250346	39403	32749	16845	65283	404626	83.87	21827	6038	Passed	0.776231
2	5	5	oligodT_149	GAATCGCCTG	SVEC	Direct_Sorting	SB22_12_PNNL_21	SVEC_2_5_5	Direct	1008206	280370	195699	97516	322365	1904156	83.07	104154	12094	Passed	2.12419
2	6	5	oligodT_150	TCGCATGACA	SVEC	Direct_Sorting	SB22_12_PNNL_21	SVEC_2_5_6	Direct	230814	44213	26729	15542	46269	363567	87.27	19960	6219	Passed	0.834625
2	7	5	oligodT_151	TCAATACGTG	SVEC	Direct_Sorting	SB22_12_PNNL_21	SVEC_2_5_7	Direct	226218	86353	45228	21430	69226	448455	84.56	30683	6980	Passed	0.564472
2	8	5	oligodT_152	ATTCTCCACG	SVEC	Direct_Sorting	SB22_12_PNNL_21	SVEC_2_5_8	Direct	225202	59301	33716	19099	79550	416868	80.92	29413	6389	Passed	0.832633
2	9	5	oligodT_153	TGTTACAGAG	SVEC	Direct_Sorting	SB22_12_PNNL_21	SVEC_2_5_9	Direct	159816	28164	20486	9368	57291	275125	79.18	15333	5218	Passed	0.81757
3	12	1	oligodT_204	ATCCAGCATG	SVEC	Direct_Sorting	SB22_12_PNNL_21	SVEC_3_1_12	Direct	181236	51141	27463	15003	169701	444544	61.83	19228	5813	Passed	0.823045
3	4	1	oligodT_196	CCAGTATTCT	SVEC	Direct_Sorting	SB22_12_PNNL_21	SVEC_3_1_4	Direct	255	89	71	17	188	620	69.68	203	155	Not passed
3	8	1	oligodT_200	CTGTATGCCA	SVEC	Direct_Sorting	SB22_12_PNNL_21	SVEC_3_1_8	Direct	442	142	272	8	311	1175	73.53	170	145	Not passed
3	12	3	oligodT_228	ATAGCCGGTT	SVEC	Direct_Sorting	SB22_12_PNNL_21	SVEC_3_3_12	Direct	213423	31898	24679	16103	93866	379969	75.3	19222	5482	Passed	1.06909
3	4	3	oligodT_220	TCGACCAGCA	SVEC	Direct_Sorting	SB22_12_PNNL_21	SVEC_3_3_4	Direct	256585	46839	34057	21404	57090	415975	86.28	27522	6495	Passed	0.931805
3	8	3	oligodT_224	TGGAAGCACA	SVEC	Direct_Sorting	SB22_12_PNNL_21	SVEC_3_3_8	Direct	185400	35714	26636	12015	42999	302764	85.8	19068	5227	Passed	0.598212
3	1	5	oligodT_241	CTTGTTACTG	SVEC	Direct_Sorting	SB22_12_PNNL_21	SVEC_3_5_1	Direct	373777	56882	52062	20743	63432	566896	88.81	31921	7355	Passed	1.02731
3	10	5	oligodT_250	CGGATCATTA	SVEC	Direct_Sorting	SB22_12_PNNL_21	SVEC_3_5_10	Direct	238278	56019	34794	17249	128279	474619	72.97	21874	6552	Passed	1.14663
3	11	5	oligodT_251	CTCTCTCTAG	SVEC	Direct_Sorting	SB22_12_PNNL_21	SVEC_3_5_11	Direct	134693	49262	29234	10747	82103	306039	73.17	21007	5085	Passed	1.0295
3	12	5	oligodT_252	AAGGCTCCAT	SVEC	Direct_Sorting	SB22_12_PNNL_21	SVEC_3_5_12	Direct	422981	90983	68595	35805	76275	694639	89.02	42436	8708	Passed	0.748464
3	2	5	oligodT_242	TCACCGTGGT	SVEC	Direct_Sorting	SB22_12_PNNL_21	SVEC_3_5_2	Direct	246675	75400	36773	20687	85759	465294	81.57	34322	6794	Passed	0.491559
3	3	5	oligodT_243	CAACTACCGC	SVEC	Direct_Sorting	SB22_12_PNNL_21	SVEC_3_5_3	Direct	514557	120345	141651	29982	166923	973458	82.85	51953	9358	Passed	0.890065
3	4	5	oligodT_244	ACTCGTCCAG	SVEC	Direct_Sorting	SB22_12_PNNL_21	SVEC_3_5_4	Direct	164962	31852	23301	13507	84420	318042	73.46	16700	5250	Passed	0.727061
3	5	5	oligodT_245	TCCGGAGAAC	SVEC	Direct_Sorting	SB22_12_PNNL_21	SVEC_3_5_5	Direct	65263	73703	24757	6390	42540	212653	80	10867	4689	Passed	1.7237
3	6	5	oligodT_246	TTGTGAGAAG	SVEC	Direct_Sorting	SB22_12_PNNL_21	SVEC_3_5_6	Direct	148345	35715	17809	11591	42081	255541	83.53	16733	4840	Passed	0.672774
3	7	5	oligodT_247	CCGAAGGTTC	SVEC	Direct_Sorting	SB22_12_PNNL_21	SVEC_3_5_7	Direct	361584	82929	58970	28784	89616	621883	85.59	42310	7901	Passed	0.774471
3	8	5	oligodT_248	ATACACACCT	SVEC	Direct_Sorting	SB22_12_PNNL_21	SVEC_3_5_8	Direct	382102	106423	62784	32159	99676	683144	85.41	45874	8870	Passed	0.964378
3	9	5	oligodT_249	AGCCTCTGCT	SVEC	Direct_Sorting	SB22_12_PNNL_21	SVEC_3_5_9	Direct	551928	119165	73064	38859	135511	918527	85.25	62667	9658	Passed	0.841625
4	12	1	oligodT_300	TCTTAGGTGG	SVEC	Direct_Sorting	SB22_12_PNNL_21	SVEC_4_1_12	Direct	170529	58992	30070	16505	49872	325968	84.7	25408	5795	Passed	0.530981
4	4	1	oligodT_292	ACTGGCAAGA	SVEC	Direct_Sorting	SB22_12_PNNL_21	SVEC_4_1_4	Direct	215697	109857	82421	15351	180152	603478	70.15	73497	7098	Passed	0.47087
4	8	1	oligodT_296	GATCAACAAG	SVEC	Direct_Sorting	SB22_12_PNNL_21	SVEC_4_1_8	Direct	493844	68279	64507	36794	87544	750968	88.34	41158	8381	Passed	0.86931
4	12	3	oligodT_324	GTACAGCGGA	SVEC	Direct_Sorting	SB22_12_PNNL_21	SVEC_4_3_12	Direct	194213	69314	36273	17659	80305	397764	79.81	21048	6458	Passed	1.33394
4	4	3	oligodT_316	TCAATCAGAG	SVEC	Direct_Sorting	SB22_12_PNNL_21	SVEC_4_3_4	Direct	218482	69644	43036	13908	118337	463407	74.46	27417	6770	Passed	0.940046
4	8	3	oligodT_320	CATTATCGCT	SVEC	Direct_Sorting	SB22_12_PNNL_21	SVEC_4_3_8	Direct	88826	35484	31980	6014	162118	324422	50.03	29459	4953	Passed	0.788022
4	1	5	oligodT_337	CGAGTTCGCA	SVEC	Direct_Sorting	SB22_12_PNNL_21	SVEC_4_5_1	Direct	375979	86328	54860	29480	124313	670960	81.47	47671	7853	Passed	0.528201
4	10	5	oligodT_346	TATCCAGTTC	SVEC	Direct_Sorting	SB22_12_PNNL_21	SVEC_4_5_10	Direct	789500	255792	133884	68081	272773	1520030	82.05	84938	11728	Passed	0.646536
4	11	5	oligodT_347	AGTCGACGTA	SVEC	Direct_Sorting	SB22_12_PNNL_21	SVEC_4_5_11	Direct	171223	66554	29665	13159	166921	447522	62.7	30417	5699	Passed	0.815864
4	12	5	oligodT_348	TTCGTTCACA	SVEC	Direct_Sorting	SB22_12_PNNL_21	SVEC_4_5_12	Direct	230131	45321	39567	15616	50669	381304	86.71	23848	6086	Passed	0.617165
4	2	5	oligodT_338	TCCTACGTGC	SVEC	Direct_Sorting	SB22_12_PNNL_21	SVEC_4_5_2	Direct	326097	201836	98024	36690	242850	905497	73.18	49286	9501	Passed	1.73344
4	3	5	oligodT_339	CCACGATAAC	SVEC	Direct_Sorting	SB22_12_PNNL_21	SVEC_4_5_3	Direct	205277	83827	38250	20059	124516	471929	73.62	29926	5940	Passed	0.711984
4	4	5	oligodT_340	CTTGCGAAGA	SVEC	Direct_Sorting	SB22_12_PNNL_21	SVEC_4_5_4	Direct	240884	119737	91153	16006	293939	761719	61.41	81993	7695	Passed	0.77463
4	5	5	oligodT_341	TGGCACGAAC	SVEC	Direct_Sorting	SB22_12_PNNL_21	SVEC_4_5_5	Direct	308894	119347	85679	23830	151020	688770	78.07	46984	9096	Passed	0.74081
4	6	5	oligodT_342	AACGACATCT	SVEC	Direct_Sorting	SB22_12_PNNL_21	SVEC_4_5_6	Direct	235021	75124	56742	14552	130861	512300	74.46	34573	6236	Passed	1.1237
4	7	5	oligodT_343	GCGAGATGGA	SVEC	Direct_Sorting	SB22_12_PNNL_21	SVEC_4_5_7	Direct	173268	105899	64118	12404	218992	574681	61.89	68271	6598	Passed	0.522181
4	8	5	oligodT_344	GTCATCGCGT	SVEC	Direct_Sorting	SB22_12_PNNL_21	SVEC_4_5_8	Direct	201983	58863	36601	15867	134823	448137	69.91	31734	5415	Passed	0.854226
4	9	5	oligodT_345	AGTGGTAGCA	SVEC	Direct_Sorting	SB22_12_PNNL_21	SVEC_4_5_9	Direct	238365	76063	33951	19231	55696	423306	86.84	27541	7110	Passed	0.723305
