# Supplementary material
Source: Royal Society of Chemistry journal article supplement (doi:10.1039/d5lc01008j)
Supplement: d5lc01008j4.xlsx [file d5lc01008j4.xlsx]

## Sheet: Supplementary file 5
List of differentially expressed genes and proteins in C10 as compared to SVEC cells											Significant in both modalities; red ~ upregulated, blue ~ downregulated
C10 vs SVEC; scProteomics					C10 vs SVEC; scRNAseq							C10 vs SVEC; scProteomics			C10 vs SVEC; scRNAseq
gene	logFC	P.Value	adj.P.Val		gene	logFC	P.Value	adj.P.Val			gene	logFC	P.Value	adj.P.Val	logFC	adj.P.Val
Ndufa4	1.20765	8.412e-39	9.59809e-36		H2-D1	-4.05919	4.82503e-24	3.45665e-20			H2-D1	-0.733888	1.46803e-24	8.8159e-23	-4.05919	3.45665e-20
Isg15	-1.05887	1.46709e-36	8.36977e-34		H2-K1	-4.19878	1.97321e-22	1.41361e-18			H2-K1	-0.607558	1.26306e-17	4.00319e-16	-4.19878	1.41361e-18
Col1a1	1.26143	6.81093e-36	2.59043e-33		Isg15	-4.27235	7.51223e-22	5.38176e-18			Isg15	-1.05887	1.46709e-36	8.36977e-34	-4.27235	5.38176e-18
Vim	1.14753	4.88627e-35	1.39381e-32		Gm28437	2.40709	9.51383e-22	6.81571e-18			Bst2	-1.17452	5.85355e-31	1.11315e-28	-3.3675	6.66718e-10
Mnda	-1.69595	4.46808e-31	1.01962e-28		Gm10925	2.13434	1.24339e-20	8.90765e-17			S100a4	1.25479	3.08031e-19	1.21194e-17	3.82129	1.38389e-08
Bst2	-1.17452	5.85355e-31	1.11315e-28		mt-Nd3	5.56791	2.1345e-20	1.52916e-16			Vim	1.14753	4.88627e-35	1.39381e-32	1.33875	6.30215e-08
Pdia3	0.758685	1.29395e-30	2.10914e-28		Trhde	2.38781	3.41343e-20	2.44538e-16			Rps14	-0.171617	0.00968128	0.024493	-1.06159	2.22144e-07
Fdps	-0.902322	6.56317e-29	9.36072e-27		Gm10073	2.85917	2.71883e-19	1.94777e-15			Ifit3	-0.630246	5.96197e-16	1.41721e-14	-5.92144	2.86464e-07
Ifit1	-0.89635	5.71699e-28	7.24788e-26		Ifitm3	-1.63688	3.92358e-17	2.81085e-13			Fscn1	0.306421	1.81069e-12	3.03822e-11	1.9186	4.52449e-06
Hspb1	-0.85638	9.43625e-28	1.07668e-25		Ifi27l2a	-3.75272	7.71829e-17	5.52938e-13			Thbs1	0.336585	0.000796181	0.00279521	2.29727	1.46125e-05
Lonp1	0.619717	1.26133e-27	1.30835e-25		mt-Nd4l	4.68959	9.65023e-17	6.91343e-13			Col3a1	0.815217	3.92368e-06	2.24971e-05	3.12045	5.24222e-05
Slc25a12	0.771312	4.81215e-27	4.4483e-25		Gm20568	3.62931	9.9321e-17	7.11536e-13			Rplp1	0.454029	2.78823e-09	2.84051e-08	0.900464	5.58659e-05
Cavin1	0.755702	5.06817e-27	4.4483e-25		B2m	-2.13977	1.75641e-16	1.25829e-12			Eef1g	0.245925	0.000139958	0.000600345	1.39255	6.30849e-05
Tp53	-1.08042	2.94093e-26	2.39685e-24		Gm28438	2.34309	1.91959e-16	1.37519e-12			Fn1	0.410855	9.19502e-09	8.39321e-08	1.79624	0.000279595
Rpl22	-0.831576	3.52551e-26	2.68173e-24		Gm49948	-2.14549	3.81374e-16	2.73217e-12			Rpl12	0.116121	0.0146847	0.0349068	1.40513	0.000393003
Psme1	-0.616889	1.17552e-25	8.38294e-24		Ank2	-1.87704	9.17922e-16	6.57599e-12			Stmn1	-0.323478	2.31102e-06	1.37337e-05	-3.03531	0.000451326
Stat1	-0.737684	2.04906e-25	1.37528e-23		Gm14513	-7.31276	1.84204e-14	1.31964e-10			Manf	0.38698	4.56616e-08	3.61805e-07	3.26237	0.000777255
Gsta4	1.30477	1.17661e-24	7.45838e-23		Bst2	-3.3675	9.30651e-14	6.66718e-10			Hmgb2	-0.337846	4.85612e-06	2.74299e-05	-2.6709	0.00115525
H2-D1	-0.733888	1.46803e-24	8.8159e-23		Cxcl12	2.18289	1.63614e-13	1.17213e-09			Rpl22l1	0.381476	6.53148e-06	3.60382e-05	1.46524	0.00372003
Acot7	-0.86356	2.33151e-24	1.33013e-22		Gm9625	1.35646	2.25834e-13	1.61787e-09			Actg1	0.525988	3.46909e-06	2.0195e-05	1.53222	0.00404138
Hsp90aa1	-0.626387	3.08365e-24	1.67545e-22		Rplp0-ps1	5.28862	4.84131e-13	3.46832e-09			Lgals3	-0.433663	2.52197e-08	2.10041e-07	-2.85731	0.0100941
Ephx1	0.625198	7.91643e-24	4.10575e-22		Gm4987	-3.36931	4.94242e-13	3.54075e-09			Actb	0.368099	1.59632e-16	4.13954e-15	0.62921	0.0145249
H1-2	-0.726662	2.91684e-23	1.44701e-21		Sema3c	2.94045	7.08519e-13	5.07583e-09			Gsta4	1.30477	1.17661e-24	7.45838e-23	3.21262	0.0200267
Aldh2	0.595166	1.7413e-22	8.27845e-21		mt-Nd1	1.20125	1.31695e-12	9.43464e-09			Capza2	0.22801	1.91288e-05	9.78741e-05	1.82452	0.0282739
Mcm4	-0.53772	1.76675e-20	8.06343e-19		Cacna2d1	3.97716	1.60869e-12	1.15247e-08			Hsp90b1	0.382594	4.36704e-08	3.48447e-07	0.848179	0.0326118
Ddx39b	-0.483001	2.25073e-20	9.87725e-19		Cdkn2a	-5.17749	1.68727e-12	1.20876e-08
Mcm7	-0.465661	4.78177e-20	2.02074e-18		S100a4	3.82129	1.93172e-12	1.38389e-08
Idh2	-0.51898	5.88669e-20	2.39883e-18		Tmem176b	1.91212	2.35416e-12	1.68652e-08
S100a4	1.25479	3.08031e-19	1.21194e-17		Dcn	3.02921	2.42592e-12	1.73793e-08
Rnf213	-0.439401	4.32264e-19	1.64404e-17		Mapk14	-1.26217	3.76321e-12	2.69597e-08
Pkm	-0.509985	1.29793e-18	4.77722e-17		Polr2g	-1.39554	4.61975e-12	3.30959e-08
Chchd3	0.666734	2.42925e-18	8.6618e-17		Efemp1	6.52694	4.74067e-12	3.39622e-08
Pth2	-0.706752	3.18413e-18	1.10094e-16		Gm5586	2.26344	6.55096e-12	4.69311e-08
Gsdma	0.869574	3.84157e-18	1.28919e-16		Sap18b	-1.74321	6.59306e-12	4.72327e-08
Pdia4	0.466682	4.44578e-18	1.44932e-16		Vim	1.33875	8.79696e-12	6.30215e-08
H2-K1	-0.607558	1.26306e-17	4.00319e-16		Cfl1	1.30207	2.40476e-11	1.72277e-07
Uqcrfs1	0.556369	2.02287e-17	6.23808e-16		Rps14	-1.06159	3.10083e-11	2.22144e-07
Pdia6	0.448435	2.34777e-17	7.04948e-16		Ifit3	-5.92144	3.99867e-11	2.86464e-07
Tm9sf3	0.879186	3.75148e-17	1.07011e-15		Trf	2.02998	6.62765e-11	4.74805e-07
Myh9	0.469013	3.54117e-17	1.03602e-15		Arpc2	1.10339	6.93385e-11	4.96741e-07
Rplp2	0.470582	9.71197e-17	2.70277e-15		Myo7a	-0.947648	8.67659e-11	6.21591e-07
Lpp	1.02888	1.43286e-16	3.80208e-15		Gm8420	-5.8016	8.79052e-11	6.29753e-07
Cox6b1	0.548397	1.3183e-16	3.58138e-15		Gm10275	1.76553	9.32428e-11	6.67991e-07
Actb	0.368099	1.59632e-16	4.13954e-15		Xaf1	-3.53033	2.13977e-10	1.53293e-06
Tspan3	-0.630726	2.8038e-16	7.10919e-15		Gm43841	1.73172	2.16158e-10	1.54855e-06
Immt	0.453959	3.3965e-16	8.4248e-15		Gm14681	4.91501	3.06157e-10	2.19331e-06
Psme2	-0.560807	4.22158e-16	1.02486e-14		Gm6278	1.16835	4.75673e-10	3.40772e-06
Ifit3	-0.630246	5.96197e-16	1.41721e-14		Cox7a2	-1.30562	5.9925e-10	4.29303e-06
Nudc	-0.489754	1.54753e-15	3.60353e-14		Tmem176a	2.36542	6.20185e-10	4.443e-06
Myl6	0.567357	2.65803e-15	6.06562e-14		Fscn1	1.9186	6.31559e-10	4.52449e-06
H1-4	-0.553748	3.40113e-15	7.6092e-14		Ftl1-ps1	-1.04694	6.33646e-10	4.53944e-06
Arl6ip5	0.696851	3.75882e-15	8.24773e-14		Ly6a	-4.13484	7.53662e-10	5.39923e-06
Oas1a	-0.522605	4.18255e-15	8.83758e-14		Igfbp7	2.35701	8.22293e-10	5.89091e-06
Mcm6	-0.452759	4.05423e-15	8.72806e-14		Baiap2l1	4.88753	1.00553e-09	7.20364e-06
Ndufab1	0.591164	4.97208e-15	1.03148e-13		Rps15a-ps8	-4.98284	1.24724e-09	8.93526e-06
Tgm2	0.640129	5.23021e-15	1.06566e-13		Reps2	-0.743912	1.4994e-09	1.07417e-05
Ppid	-0.456008	1.33248e-14	2.66731e-13		Gm5525	2.16633	1.84921e-09	1.32478e-05
Acta2	0.777788	1.50195e-14	2.9547e-13		Thbs1	2.29727	2.03971e-09	1.46125e-05
Tpm1	0.53224	1.75935e-14	3.40241e-13		Gm12337	-6.38277	2.61645e-09	1.87443e-05
Suclg2	0.512883	3.45186e-14	6.56428e-13		Hist1h2ap	-2.35198	2.74262e-09	1.96481e-05
Set	0.525362	1.74953e-13	3.27249e-12		Sart3	-1.06289	3.03977e-09	2.17769e-05
Stt3a	0.399066	1.89e-13	3.4782e-12		Gm7429	2.78912	3.19888e-09	2.29168e-05
Rpn1	0.332664	2.22661e-13	4.03264e-12		C3	2.73552	3.91146e-09	2.80217e-05
Hspd1	0.34745	2.51854e-13	4.49009e-12		mt-Cytb	1.31005	4.31084e-09	3.08828e-05
Mcm2	-0.414331	7.41183e-13	1.30106e-11		Ftl2-ps	-1.04704	5.93517e-09	4.25196e-05
Ssr1	0.478954	1.34321e-12	2.32212e-11		Gm49138	2.29859	6.02448e-09	4.31593e-05
Myh10	0.319053	1.47735e-12	2.51591e-11		Prdm10	-1.55879	6.14334e-09	4.40109e-05
Ugt1a7	0.855234	2.29671e-12	3.74363e-11		Col3a1	3.12045	7.31744e-09	5.24222e-05
Fscn1	0.306421	1.81069e-12	3.03822e-11		Igfbp4	2.34936	7.6871e-09	5.50704e-05
Lgals9	-0.460019	2.12849e-12	3.51972e-11		Rplp1	0.900464	7.79815e-09	5.58659e-05
Zyx	0.714742	2.64905e-12	4.25714e-11		Ftl1	-1.00657	7.99447e-09	5.72724e-05
Rcn1	0.483789	3.13366e-12	4.96597e-11		Lbh	3.58918	8.00599e-09	5.73549e-05
Gng5	0.352796	4.52703e-12	7.0758e-11		Mir692-2	-0.972113	8.18306e-09	5.86234e-05
Calu	0.356796	5.10195e-12	7.86666e-11		Eef1g	1.39255	8.80582e-09	6.30849e-05
Hspa5	0.380006	5.27566e-12	8.02604e-11		Crip1	3.31637	9.78016e-09	7.00651e-05
Rpn2	0.326592	6.67971e-12	1.00284e-10		mt-Nd6	1.33852	9.80902e-09	7.02718e-05
Ywhah	-0.401756	7.27157e-12	1.07751e-10		Ifit3b	-6.17047	1.06093e-08	7.60053e-05
Top2a	-0.431018	7.5809e-12	1.10895e-10		Gm4366	2.13462	1.10104e-08	7.88782e-05
Hspa8	-0.279171	1.17159e-11	1.67304e-10		Gm44257	6.8018	1.26932e-08	9.09338e-05
Cyb5r3	0.400072	1.17303e-11	1.67304e-10		Malrd1	4.86891	1.47602e-08	0.000105742
Snrpg	-0.471081	2.60709e-11	3.67246e-10		Tmsb4x	1.51453	1.51023e-08	0.000108193
Pfkp	-0.512737	2.98624e-11	4.05632e-10		Ldb2	-1.81291	1.54986e-08	0.000111032
Lamb1	0.427874	2.9054e-11	4.04276e-10		Extl3	-1.49791	1.64394e-08	0.000117772
Canx	0.394898	2.98048e-11	4.05632e-10		Ambra1	-1.34394	1.70289e-08	0.000121995
H1-5	-0.454854	3.24135e-11	4.35104e-10		Gm15590	-0.960345	1.72027e-08	0.00012324
Mcm3	-0.320237	3.52514e-11	4.67696e-10		Rpl38-ps1	1.30104	2.46265e-08	0.000176424
Anxa6	0.324958	3.69263e-11	4.82138e-10		Gm8730	1.70279	2.54057e-08	0.000182007
Lrrc59	0.333625	3.71851e-11	4.82138e-10		Gm15421	1.51171	2.55594e-08	0.000183108
Srsf6	0.365661	6.18168e-11	7.92505e-10		mt-Nd4	0.894288	3.17679e-08	0.000227585
Epb41l2	0.30358	7.3811e-11	9.3576e-10		Sap18	-2.01601	3.27329e-08	0.000234498
Lmna	0.360349	7.59089e-11	9.51781e-10		Mettl15	-1.44708	3.59075e-08	0.000257241
Anxa3	0.306646	7.94336e-11	9.85149e-10		Pttg1	-2.95834	3.59538e-08	0.000257573
Plec	0.315829	1.53404e-10	1.88208e-09		Mir703	1.59108	3.73572e-08	0.000267627
Hck	-0.469407	2.06715e-10	2.50917e-09		Fn1	1.79624	3.90278e-08	0.000279595
Park7	-0.275087	2.14009e-10	2.57036e-09		Bcas3	-1.0529	4.69083e-08	0.000336051
S100a6	-0.61443	2.27756e-10	2.70698e-09		Mt2	3.06973	5.16808e-08	0.000370241
Lrpap1	-0.452051	2.48555e-10	2.92373e-09		S100a11	1.55731	5.21111e-08	0.000373324
Fasn	-0.278798	3.13436e-10	3.64929e-09		Rpl12	1.40513	5.48581e-08	0.000393003
Flnb	-0.237727	3.54536e-10	4.08612e-09		Rps3a1	1.22961	5.72426e-08	0.000410086
Myl12b	0.458651	4.10604e-10	4.685e-09		Stmn1	-3.03531	6.29991e-08	0.000451326
Impdh2	-0.374627	5.10608e-10	5.76836e-09		Snhg18	3.21683	6.33645e-08	0.000453943
Nucks1	0.610529	5.81617e-10	6.50613e-09		H2ac8	-2.55345	6.38429e-08	0.00045737
Jpt1	-0.396189	6.38995e-10	7.07858e-09		Gm8885	-6.15276	8.13847e-08	0.00058304
Myof	0.29531	6.59325e-10	7.23356e-09		Ccdc12	-1.03051	1.04738e-07	0.000750344
Nampt	-0.591214	1.10598e-09	1.1905e-08		Ghr	2.92959	1.05605e-07	0.000756554
Sec61a1	0.316077	8.89778e-10	9.66892e-09		Manf	3.26237	1.08494e-07	0.000777255
Gpx1	-0.442724	1.35014e-09	1.43973e-08		Csf1	2.1296	1.52664e-07	0.00109369
Esyt1	-0.38098	1.8559e-09	1.96073e-08		H2ac15	-2.44983	1.53613e-07	0.00110048
Akap12	-0.860102	2.95764e-09	2.96023e-08		Tulp4	-0.775682	1.55336e-07	0.00111283
H3c2	-0.511559	2.49827e-09	2.61516e-08		Hmgb2	-2.6709	1.61257e-07	0.00115525
H2ax	-0.39518	2.54844e-09	2.64343e-08		Rps12	1.48795	2.32547e-07	0.00166597
Uqcrc1	0.444853	2.75733e-09	2.83434e-08		Eef1b2	1.55341	2.5126e-07	0.00180003
Rplp1	0.454029	2.78823e-09	2.84051e-08		mt-Nd2	0.964327	2.61784e-07	0.00187542
Pfkl	-0.308033	2.88371e-09	2.91178e-08		Irf7	-4.17047	2.85288e-07	0.0020438
Macroh2a1	0.342767	3.34833e-09	3.29348e-08		Psmb9	-6.1167	3.01726e-07	0.00216157
Ddost	0.289233	3.28134e-09	3.25566e-08		Rpl30-ps8	5.39654	3.09284e-07	0.00221571
Ifi204	-0.620129	4.18426e-09	4.08055e-08		Spp1	2.60662	3.32949e-07	0.00238525
Fv4	0.495378	4.95212e-09	4.70864e-08		Ogn	4.83094	3.90182e-07	0.00279527
Flna	0.396585	4.27527e-09	4.13397e-08		Gm5805	-1.14634	4.23434e-07	0.00303348
Pfdn2	-0.462462	5.75936e-09	5.34263e-08		Lpl	2.8442	4.2597e-07	0.00305165
Cav1	0.366147	4.32075e-09	4.14284e-08		Gm10086	-1.35265	4.40463e-07	0.00315548
Tubb6	-0.523108	5.44268e-09	5.09025e-08		Gm24276	1.22512	4.53264e-07	0.00324719
Lgals1	0.3322	5.28486e-09	4.98349e-08		Apol9b	-4.39788	4.66708e-07	0.0033435
Ssr3	0.441687	6.56844e-09	6.04403e-08		H3f3b	-1.00249	4.7611e-07	0.00341086
Fn1	0.410855	9.19502e-09	8.39321e-08		H2ac14	-2.64942	4.79818e-07	0.00343741
Tufm	0.327525	9.72642e-09	8.80781e-08		Rpl22l1	1.46524	5.19268e-07	0.00372003
Oasl2	-0.450044	1.22266e-08	1.09847e-07		Rps12-ps9	1.66771	5.54981e-07	0.00397588
Mtco2	0.384602	1.30616e-08	1.1553e-07		Gm9416	1.39096	5.59587e-07	0.00400888
Tmcc1	0.475545	1.33522e-08	1.16296e-07		Actg1	1.53222	5.64123e-07	0.00404138
Phb1	0.26819	1.26589e-08	1.12842e-07		Sdc4	1.2693	5.73662e-07	0.00410972
Vapa	0.238782	1.32221e-08	1.16049e-07		mt-Rnr2	1.02798	5.76058e-07	0.00412688
Cnn2	0.4415	1.76729e-08	1.52763e-07		Ubb	-0.642484	6.05623e-07	0.00433868
Aldh18a1	0.313407	1.79254e-08	1.53781e-07		Hist1h2ao	-2.25917	6.13527e-07	0.00439531
Fam162a	0.497128	2.38333e-08	1.99954e-07		Snhg9	5.77205	6.78223e-07	0.00485879
Gltp	-0.4166	2.37282e-08	1.99954e-07		Gm8129	1.1173	7.17589e-07	0.00514081
Calr	0.330847	1.8902e-08	1.6095e-07		Srpk1	-0.738831	7.65316e-07	0.00548273
Lgals3	-0.433663	2.52197e-08	2.10041e-07		Gm8430	1.00812	7.83883e-07	0.00561574
Eno1	-0.278818	3.03102e-08	2.50608e-07		Col23a1	-2.49099	8.0091e-07	0.00573772
Atp5mk	0.48688	3.69719e-08	2.99184e-07		Gm20900	1.40948	1.00705e-06	0.0072145
Prps1	-0.44722	3.50347e-08	2.85533e-07		Cyp1b1	2.97558	1.01799e-06	0.00729287
Ssrp1	-0.461294	3.76565e-08	3.02578e-07		Gm13611	2.03856	1.02446e-06	0.00733926
Cttn	0.279724	3.48416e-08	2.85533e-07		H2aj	1.75343	1.22623e-06	0.00878468
Hsp90b1	0.382594	4.36704e-08	3.48447e-07		Serpinf1	1.70166	1.27347e-06	0.00912316
Manf	0.38698	4.56616e-08	3.61805e-07		Rps21	1.24258	1.38625e-06	0.00993113
Kif5b	-0.323666	5.69097e-08	4.47821e-07		Lgals3	-2.85731	1.409e-06	0.0100941
Ppfibp1	0.347533	6.27029e-08	4.86694e-07		Lst1	5.47249	1.456e-06	0.0104308
St13	-0.385945	6.21494e-08	4.85702e-07		Gm37144	-1.70313	1.51955e-06	0.0108861
Rrbp1	0.277816	6.70166e-08	5.16661e-07		Sparc	0.91416	1.77907e-06	0.0127453
Acly	-0.307516	7.89056e-08	6.04237e-07		Gm9616	1.45502	1.98261e-06	0.0142034
Ncbp1	-0.600086	1.13557e-07	8.63792e-07		9330111N05Rik	2.18709	1.99818e-06	0.0143149
Ube2k	0.492749	1.34596e-07	1.01705e-06		Actb	0.62921	2.02749e-06	0.0145249
Luc7l3	0.35458	1.65504e-07	1.22624e-06		Rack1	0.961793	2.19442e-06	0.0157208
Eif2ak2	-0.479636	1.79352e-07	1.3118e-06		Orc5	1.28284	2.2441e-06	0.0160768
Tmsb10	0.428316	1.49899e-07	1.12523e-06		Gm26384	1.9198	2.35039e-06	0.0168382
Pgk1	-0.269026	1.52561e-07	1.13773e-06		Apol9a	-2.92839	2.62874e-06	0.0188323
Arhgap1	0.320407	1.7193e-07	1.26563e-06		Uba52-ps	-0.628638	2.64479e-06	0.0189473
Sumo2	0.371569	1.8922e-07	1.36619e-06		Rpl18-ps1	-0.816103	2.76504e-06	0.0198087
Eef1b	0.372149	1.87453e-07	1.36231e-06		Gsta4	3.21262	2.79546e-06	0.0200267
Slc25a3	0.264296	1.90381e-07	1.36619e-06		H4c4	-2.34343	2.79874e-06	0.0200501
Sh3bgrl3	0.325118	2.03076e-07	1.44819e-06		Lifr	2.83618	2.91645e-06	0.0208935
Tmed10	0.322049	2.29782e-07	1.62846e-06		Lxn	2.79852	3.46532e-06	0.0248256
Ctsa	-0.292197	2.3745e-07	1.67241e-06		Arid5b	1.65915	3.47734e-06	0.0249116
Fmr1	-0.500032	3.34474e-07	2.31294e-06		Cdc42ep3	3.77205	3.70829e-06	0.0265662
Scfd1	-0.50911	3.52463e-07	2.42265e-06		Nme7	-3.54988	3.72848e-06	0.0267108
Coro1b	-0.264087	2.86524e-07	2.00567e-06		Rps12-ps13	1.61451	3.83213e-06	0.0274534
Pgd	-0.302766	3.03197e-07	2.10943e-06		Capza2	1.82452	3.94667e-06	0.0282739
Ctps1	-0.272546	3.79707e-07	2.59429e-06		Gm43712	1.90329	4.0773e-06	0.0292098
Marcksl1	-0.356359	5.36021e-07	3.64048e-06		Nipsnap1	2.92405	4.40375e-06	0.0315484
P4hb	0.271493	5.95037e-07	4.01738e-06		Rpl9-ps6	0.860725	4.47627e-06	0.032068
Slc25a5	0.336815	6.09121e-07	4.08828e-06		Hsp90b1	0.848179	4.55218e-06	0.0326118
Ass1	-0.473174	7.5701e-07	5.02179e-06		Rbms1	2.116	4.56786e-06	0.0327241
Sec61b	0.275187	7.12575e-07	4.75467e-06		Selenos	2.01896	4.81914e-06	0.0345243
Cox5a	0.429988	8.92414e-07	5.88581e-06		Rpl38	0.686013	4.88663e-06	0.0350078
S100a10	0.478615	9.08281e-07	5.95603e-06		Chchd2	-0.916471	4.99747e-06	0.0358019
Atp2a2	0.24292	9.19499e-07	5.99513e-06		Gm20430	2.33393	5.08543e-06	0.036432
Serpinh1	0.321052	9.54186e-07	6.18595e-06		Gm12854	1.70646	5.25075e-06	0.0376164
Atp6v1g1	-0.434926	1.46461e-06	8.98452e-06		Gm7665	2.33683	5.41283e-06	0.0387775
Derl1	0.340264	1.09951e-06	7.05035e-06		Rpl38-ps2	0.924051	5.53058e-06	0.039621
Ube2n	-0.338686	1.09988e-06	7.05035e-06		Rps27a	0.861685	5.66141e-06	0.0405584
Vps35	-0.457664	1.20686e-06	7.65012e-06		Tpm3-rs7	1.78799	6.0335e-06	0.043224
Uqcrc2	0.259006	1.18063e-06	7.52572e-06		Gm6548	1.42315	6.25596e-06	0.0448177
Rpl5	0.192583	1.24684e-06	7.85994e-06		Gm10320	4.18709	6.40006e-06	0.04585
Atp6v0c	-0.396152	1.32214e-06	8.28878e-06		Cp	5.35701	6.56555e-06	0.0470356
Tln1	0.26598	1.33504e-06	8.32392e-06		Hist1h2an	-2.52827	6.70175e-06	0.0480114
Dad1	0.327365	1.38058e-06	8.56109e-06		Gsk3b	2.48477	6.80846e-06	0.0487758
Pdcd6ip	-0.267956	1.44757e-06	8.92801e-06		Gtf2h5	1.50196	6.85841e-06	0.0491336
Cfl2	-0.331804	1.55616e-06	9.43243e-06		Psmb8	-5.33648	6.98557e-06	0.0500447
Ldha	-0.268786	1.56046e-06	9.43243e-06		Marcks	0.947898	7.69879e-06	0.0551541
Hnrnpab	-0.225588	1.56243e-06	9.43243e-06		Dis3l	-2.62027	8.08582e-06	0.0579268
Ehd1	0.299213	1.74682e-06	1.04901e-05		Ndufa13	-0.886496	8.13385e-06	0.0582709
Glipr2	0.250263	2.22741e-06	1.33062e-05		Tmem250-ps	2.86516	8.32457e-06	0.0596372
Stmn1	-0.323478	2.31102e-06	1.37337e-05		Coa3	3.60212	8.59097e-06	0.0615457
Smu1	-0.328005	2.61809e-06	1.5478e-05		1810058I24Rik	1.67251	9.2172e-06	0.066032
Col3a1	0.815217	3.92368e-06	2.24971e-05		Rtp4	-3.98284	9.23061e-06	0.0661281
Hexa	-0.282897	3.12543e-06	1.83821e-05		C230062I16Rik	-0.885384	9.32359e-06	0.0667942
Actg1	0.525988	3.46909e-06	2.0195e-05		Ly6e	-3.63309	9.41545e-06	0.0674523
Cse1l	-0.242737	3.23428e-06	1.89247e-05		Atl3	-2.04782	9.44036e-06	0.0676308
Tor1aip1	-0.249659	3.54529e-06	2.04302e-05		Cfap61	-1.49881	9.80855e-06	0.0702685
Khsrp	0.310951	3.53772e-06	2.04302e-05		Eno1b	-2.05577	1.00922e-05	0.0723008
Psip1	-0.448806	5.08995e-06	2.8609e-05		Gm6204	-1.66377	1.13941e-05	0.0816274
Vcp	0.165698	4.56054e-06	2.60179e-05		Plod2	2.99444	1.15959e-05	0.0830731
Hmgb2	-0.337846	4.85612e-06	2.74299e-05		Gm11808	-0.578617	1.19641e-05	0.0857108
Stip1	-0.284064	4.84478e-06	2.74299e-05		Gm12013	1.91644	1.2084e-05	0.0865696
Rpl22l1	0.381476	6.53148e-06	3.60382e-05		Rps10-ps2	1.03667	1.21857e-05	0.087298
Atp5po	0.207728	5.62505e-06	3.14617e-05		S100a10	0.957123	1.23446e-05	0.0884368
Cdk1	-0.405143	6.07356e-06	3.38046e-05		Gbf1	-0.87673	1.2773e-05	0.0915059
Srsf1	0.189968	6.53805e-06	3.60382e-05		Oas1g	-5.23918	1.27837e-05	0.0915827
Psph	-0.326633	9.74602e-06	5.24957e-05		Slc26a8	-0.67437	1.2971e-05	0.0929245
Rpl4	0.174388	7.27351e-06	3.97284e-05		Nfia	3.04507	1.31097e-05	0.0939179
Glud1	0.200426	7.27716e-06	3.97284e-05		Ccl5	-5.44227	1.32012e-05	0.0945735
Mybbp1a	0.205906	7.4125e-06	4.02746e-05		Hspa5	0.858304	1.34258e-05	0.0961826
Dnajb11	0.37619	9.75381e-06	5.24957e-05		Cavin2	2.37151	1.34756e-05	0.0965391
Mtor	-0.350298	1.13995e-05	6.04682e-05		Ndufv3	1.19781	1.4475e-05	0.103699
Atp6v1e1	-0.264095	1.05475e-05	5.62368e-05		Cstb	-1.00274	1.50704e-05	0.107965
Tmed9	0.242063	1.01066e-05	5.41394e-05		Eef1a1	0.881871	1.51018e-05	0.108189
Acyp1	-0.498551	1.43622e-05	7.48276e-05		Prss23	3.64652	1.65415e-05	0.118503
Psmd3	-0.200317	1.14471e-05	6.04682e-05		Ptpn12	2.45012	1.73191e-05	0.124074
Tbca	-0.232346	1.18122e-05	6.21094e-05		Ubb-ps	-0.693562	1.74298e-05	0.124867
Pycr2	-0.32929	1.34057e-05	7.01649e-05		Cxcl5	4.27455	1.77701e-05	0.127305
Ak1	0.424555	1.52648e-05	7.88108e-05		Shld2	-1.98284	1.96438e-05	0.140728
Atp6v1b2	-0.329321	1.45763e-05	7.55979e-05		Selenoh	-2.0517	2.04828e-05	0.146739
Pdap1	0.320302	1.85845e-05	9.55176e-05		Spint2	-2.9534	2.1402e-05	0.153324
Capza2	0.22801	1.91288e-05	9.78741e-05		Tmcc1	-1.00972	2.19043e-05	0.156922
Bcap31	0.298337	1.97282e-05	0.000100491		Efemp2	1.88098	2.24475e-05	0.160814
Myo1c	0.178339	2.08238e-05	0.0001056		Slc12a8	-0.628313	2.30305e-05	0.164991
Pfn1	0.225626	2.14377e-05	0.000107755		Rpl18a	-0.652036	2.31031e-05	0.16551
Alyref	-0.220914	2.15499e-05	0.000107844		P4hb	1.45627	2.37617e-05	0.170229
Phgdh	-0.281274	2.1423e-05	0.000107755		Gm4739	-2.49474	2.48819e-05	0.178254
Ndufs7	0.432157	3.1273e-05	0.000149927		Xkr6	-1.62761	2.53144e-05	0.181352
Rai14	0.307002	2.37184e-05	0.000117683		Tuba1b	-0.809842	2.54363e-05	0.182226
Fkbp7	-0.428953	2.44511e-05	0.000120253		Chchd3	2.14644	2.55212e-05	0.182834
Rap1b	-0.203721	2.37355e-05	0.000117683		Spdye4a	2.81158	2.66257e-05	0.190746
Rtn4	0.24124	2.38254e-05	0.000117683		Sema3a	2.30908	2.73868e-05	0.196199
Ddx1	-0.256495	2.60635e-05	0.000127087		Vamp5	2.83916	2.74623e-05	0.19674
Npm1	0.210138	2.5696e-05	0.000125833		Phlda1	4.77205	2.85845e-05	0.204779
Trappc3	-0.362646	3.09492e-05	0.000149		Gm41724	4.99444	2.86601e-05	0.205321
Prkar1a	0.252487	2.84535e-05	0.000138151		Cdk19	-1.43124	2.89622e-05	0.207485
Ssr4	0.392448	3.22016e-05	0.000153732		Col6a1	3.5794	2.92283e-05	0.209392
Tpm4	0.200561	3.00697e-05	0.000145379		Gm11575	3.18709	3.09521e-05	0.221741
Lgals3bp	-0.401739	4.46665e-05	0.000208018		Calr	1.18709	3.15777e-05	0.226223
Hdgfl3	0.394146	4.11258e-05	0.000193903		Aldh2	2.41975	3.15823e-05	0.226255
Tnpo1	-0.279696	3.77638e-05	0.000179535		Mrpl30	-2.03531	3.17181e-05	0.227229
Sri	0.337823	4.57956e-05	0.00021155		Rpl22	-1.4206	3.22598e-05	0.231109
Ehd4	-0.320449	4.61135e-05	0.000211912		Mtss1	1.37973	3.28149e-05	0.235086
Rpl27	0.165347	3.81843e-05	0.000180781		Ints9	-1.49251	3.47878e-05	0.24922
Sars1	-0.198258	4.29495e-05	0.000201668		Adam10	-2.31541	3.58485e-05	0.256819
Txndc5	0.209457	4.42379e-05	0.000206866		Eno1	-1.85731	3.60547e-05	0.258296
Tpm3	0.271549	4.62455e-05	0.000211912		Gm14165	0.754839	3.78556e-05	0.271197
Yars1	-0.163183	4.48813e-05	0.000208169		Tubb5	-0.737813	3.86597e-05	0.276958
Psmc2	-0.180566	4.6605e-05	0.000212705		Selenow	-1.49791	3.87442e-05	0.277564
Flnc	0.202873	4.82597e-05	0.00021938		Rpl36	0.806215	3.88358e-05	0.27822
Sf1	-0.310448	6.70393e-05	0.000297634		Nsg1	3.12569	3.90908e-05	0.280047
Dnajc8	0.442537	6.63259e-05	0.000295616		Hmgn2	-1.73491	3.94202e-05	0.282406
Mcm5	-0.291847	5.52127e-05	0.000249003		Rps3a2	0.881966	3.94797e-05	0.282833
Pa2g4	-0.185292	5.15228e-05	0.000233284		Rps12-ps24	1.81935	4.11271e-05	0.294635
Niban1	-0.208868	5.92138e-05	0.000265996		Rnd3	1.68666	4.23597e-05	0.303465
Cd9	0.4126	7.21374e-05	0.000319026		Rplp0	0.448616	4.24311e-05	0.303977
Cks1b	-0.386979	7.72805e-05	0.000339142		Gm9354	0.85644	4.25897e-05	0.305113
Hnrnpm	0.188212	6.28879e-05	0.000281392		Slc16a2	1.08868	4.42792e-05	0.317216
Cox4i1	0.427743	8.39458e-05	0.000366981		Zbp1	-4.39788	4.53905e-05	0.325178
Actn4	0.146247	7.44987e-05	0.000328197		Cd47	1.20981	4.55846e-05	0.326568
Caprin1	0.218112	8.99019e-05	0.000391519		Tm4sf1	0.95928	4.6556e-05	0.333527
Cox6c	0.29314	0.000138932	0.000598193		Cadm1	3.02839	4.71469e-05	0.33776
Phb2	0.176607	0.000102121	0.000443042		Ncam1	1.88098	4.80379e-05	0.344144
Fubp1	-0.222651	0.000123616	0.000534266		Gm8976	1.41535	4.8804e-05	0.349632
Cpox	0.360354	0.000182761	0.0007607		Gm4149	0.625324	4.90559e-05	0.351436
Eef1g	0.245925	0.000139958	0.000600345		Canx	1.06017	4.91483e-05	0.352098
Dnajc10	0.254929	0.00015279	0.00064568		Ppfibp1	1.4837	4.96744e-05	0.355867
Eloc	-0.266689	0.000147204	0.000626716		mt-Tc	-4.48534	5.02247e-05	0.35981
Vps29	-0.228783	0.000149936	0.000635972		Ift20	1.87158	5.15804e-05	0.369522
Tpt1	-0.24998	0.000146661	0.000626716		Arpc1b	0.765162	5.24197e-05	0.375534
Kdelr3	-0.303649	0.000168916	0.000708578		Gm3787	-2.67641	5.35187e-05	0.383408
Snrpb	-0.308119	0.000195356	0.000801802		Gm15427	-0.704698	5.37958e-05	0.385393
Ehd2	0.280969	0.000186292	0.000767362		Ccdc57	-1.49673	5.44361e-05	0.38998
Cct5	-0.193727	0.000158095	0.00066563		Aebp1	1.20219	5.58902e-05	0.400397
Lap3	-0.274944	0.000185707	0.000767362		Tpk1	2.90329	5.78724e-05	0.414598
Ppib	0.194681	0.000174542	0.000729494		Sec61b	1.30908	5.83331e-05	0.417898
Pawr	0.499362	0.00020795	0.000841385		Tnnc1	5.04507	5.91771e-05	0.423945
Rpl7a	0.173272	0.000183341	0.0007607		Slc7a15	5.09398	5.91815e-05	0.423976
Anxa7	-0.203856	0.00020296	0.000827061		Rpl7a-ps11	4.09398	5.93084e-05	0.424885
Cyrib	-0.227635	0.000225492	0.000902758		Nusap1	-2.48534	5.93181e-05	0.424955
Gsn	0.172975	0.000199862	0.000817357		Rpl28	-0.696101	6.14288e-05	0.440076
Gbp3	-0.283333	0.000229195	0.000911189		Crim1	3.18709	6.26943e-05	0.449142
Rpl23a	0.275783	0.00020674	0.000839467		Gm4613	0.724351	6.30766e-05	0.451881
G3bp2	-0.347246	0.000233682	0.0009226		Mif	-0.683077	6.32433e-05	0.453075
Rpl6	0.142628	0.000214492	0.000864791		Eif1	-0.630629	6.86613e-05	0.49189
Marcks	0.237156	0.000225122	0.000902758		Slc1a1	1.94381	6.97425e-05	0.499636
Cyb5a	0.240189	0.000230623	0.000913683		Rpl7a-ps7	1.37973	7.01934e-05	0.502865
Sfpq	0.199756	0.000228306	0.000910829		Spata7	3.09398	7.20974e-05	0.516506
Niban2	0.259832	0.000299237	0.00116132		Rhof	-5.33648	7.54995e-05	0.540878
Septin9	0.201184	0.000244608	0.000962408		Cenpa	-3.70044	7.62607e-05	0.546332
Maoa	0.245968	0.00025698	0.00100761		Rpl39-ps	1.28395	7.71855e-05	0.552957
Psmc6	-0.181379	0.000279119	0.00109067		Nbas	2.54966	7.80468e-05	0.559127
Tubb2a	-0.271232	0.000285113	0.00111029		Hnrnpa2b1	1.55632	7.88206e-05	0.564671
Lasp1	0.385281	0.000307963	0.00119114		Gm7392	-0.573416	7.94829e-05	0.569416
Irgm1	-0.397229	0.000383385	0.00146793		Rps15a	0.747706	8.17747e-05	0.585834
Rac1	0.164048	0.000341495	0.00131637		Gm3448	2.99444	8.30099e-05	0.594683
Farsa	-0.353508	0.000474553	0.00176373		Gm5621	1.67251	8.55828e-05	0.613115
Atp6v0d1	-0.264209	0.000403131	0.00152309		Rps6-ps4	-0.835998	8.62934e-05	0.618206
Smc3	-0.278112	0.000394973	0.00149722		Rps27a-ps2	0.912369	8.89276e-05	0.637078
Trap1	0.196655	0.000388714	0.00147841		Cdkn1a	1.4223	9.75905e-05	0.699138
Dync2h1	0.271048	0.000386042	0.00147316		Rps25	0.71841	9.9055e-05	0.70963
Fbl	0.168893	0.000376818	0.00144764		Ifi44	-3.08593	9.96969e-05	0.714228
Psmd6	-0.200223	0.000422324	0.00158511		Hist1h2bq	-2.55542	0.000100192	0.717774
Sec31a	0.219927	0.00040935	0.00154148		Rps13-ps2	1.04857	0.000103473	0.741281
Apex1	-0.351298	0.000525479	0.00192451		Trappc9	-0.812914	0.000109962	0.787767
Ddx5	-0.163533	0.000458993	0.00171709		Rpl37a	0.624461	0.000111037	0.795469
Abracl	-0.389344	0.000494776	0.00182699		Gm12918	0.920692	0.000112857	0.808511
Akr1b1	-0.201258	0.000473882	0.00176373		Mcrip1	4.35701	0.000120569	0.863755
Septin11	0.170898	0.000476326	0.00176457		Rpl12-ps1	4.50901	0.000120863	0.865863
Sh3bgrl	0.246396	0.000500446	0.00184196		Rpl30-ps10	4.5794	0.000120863	0.865863
G3bp1	0.199355	0.000526247	0.00192451		Lsp1	4.71065	0.000121051	0.867206
Snrnp200	-0.176	0.000551832	0.00201163		Plec	2.18709	0.000123725	0.886367
H3-5	-0.296563	0.000648062	0.00234743		Rnf216	-1.55947	0.00012676	0.908109
Ap2s1	-0.241169	0.000676189	0.00243385		Tpm3	1.13556	0.000126851	0.908763
Cct2	-0.13013	0.000585113	0.00212616		Rps15a-ps3	-1.42536	0.000127884	0.916163
Thbs1	0.336585	0.000796181	0.00279521		Gm8649	3.5794	0.000129609	0.928522
Uqcrh	0.343565	0.000749231	0.0026595		Rrm2b	0.817671	0.000130919	0.937903
Kpna2	-0.258701	0.00072675	0.00259132		Gm32899	2.94197	0.000133957	0.959669
Cotl1	-0.310397	0.000910012	0.00311501		Junb	2.30256	0.000138266	0.990539
Fkbp4	-0.175519	0.00066406	0.00239776		Bmper	2.27455	0.000139061	0.996232
Uso1	0.156256	0.000688248	0.00246947		Ifi203	-2.94677	0.000141182	1
Hip1	-0.299635	0.000911843	0.00311501		Lox	1.89163	0.000142504	1
Samhd1	-0.197834	0.000720587	0.0025774		F630206G17Rik	-0.918956	0.000144902	1
Rad23b	-0.225935	0.000774632	0.00273132		Zfand3	1.67251	0.000146386	1
Mthfd1	-0.168125	0.000750534	0.0026595		Pdia3	1.25526	0.000147441	1
Atp5mg	0.220185	0.000969669	0.00328306		Pfdn1	-0.87762	0.000148425	1
Eef1d	0.219204	0.000775588	0.00273132		Arhgef1	-1.0153	0.000149252	1
H4c1	-0.228343	0.000800368	0.00280129		Eno3	3.30256	0.000150209	1
Slc25a4	0.169691	0.000835304	0.00291462		Bgn	-4.17047	0.000157798	1
Gnb1	0.206675	0.000841533	0.00292741		Top2a	-0.688856	0.000158617	1
Got2	0.211454	0.000845157	0.00293108		Gm8960	0.919894	0.000160909	1
Rbmxl1	0.143169	0.000857429	0.00296463		Gm10282	-1.64645	0.000162988	1
Reep5	0.288899	0.00106326	0.00355773		Cd81	0.948475	0.000164582	1
Gdi2	-0.134582	0.000876787	0.0030224		Bicc1	1.85005	0.000167613	1
Cct4	-0.136742	0.000896996	0.00308275		Bzw1	1.40948	0.000168426	1
Srsf2	0.215736	0.00092314	0.00314419		Hsp90ab1	0.507063	0.0001701	1
H1-0	-0.19964	0.000929087	0.00315502		Gm13339	0.996143	0.000178126	1
Eif1ax	-0.330489	0.0011941	0.00397222		Vcp	1.44695	0.000178613	1
Smc2	-0.350696	0.00125198	0.00412863		Rps25-ps1	0.950046	0.000179774	1
Hmgn2	-0.231039	0.000977295	0.00329909		Kif20b	-2.69556	0.000180121	1
Myadm	-0.197065	0.00103934	0.0034982		Gm5566	1.22556	0.000184537	1
Idh3a	0.184398	0.00107477	0.00358571		Rpl9	0.59679	0.000185872	1
Atp5pb	0.175625	0.00106102	0.00355773		Gm11759	0.891888	0.00018669	1
Rps27	0.35087	0.00152687	0.00496341		Rps10-ps1	0.947898	0.000187984	1
Rbm14	-0.428804	0.00167312	0.00539273		Rpl36al	1.71433	0.000189788	1
Tma7	-0.288268	0.00136812	0.00447285		2010110G14Rik	-1.8682	0.000190642	1
Arhgdib	0.262348	0.00120622	0.00398925		B020010K11Rik	-0.776909	0.000203419	1
Rbbp4	-0.169185	0.00120261	0.00398891		Rpl13	0.550969	0.000204558	1
Ran	-0.199347	0.00129262	0.00425039		Rpl36-ps2	0.796194	0.000204795	1
Anxa1	0.247984	0.00132574	0.00434675		Car12	2.81935	0.000207301	1
Rhog	0.248724	0.00192299	0.00611178		Atp6v1g1	-1.23868	0.000207628	1
Acat2	-0.251677	0.00163398	0.00529652		Ddit3	-2.64073	0.000209138	1
Ubxn1	-0.190016	0.00150178	0.0048958		Tek	1.42412	0.00021003	1
Ube2d3	-0.222551	0.0020158	0.00634645		Mmd	2.64652	0.000216545	1
Acp1	-0.25308	0.00195725	0.0062034		Akap12	-1.45337	0.000219395	1
Gdi1	-0.27438	0.00164625	0.00532118		Gm15710	1.0646	0.000219658	1
Gns	-0.240432	0.00174373	0.00560239		Gipr	2.62766	0.000219708	1
Nnt	0.285966	0.00199915	0.00631866		Coq8b	-3.32749	0.000224102	1
Pcmt1	-0.275304	0.00240606	0.00734041		Raph1	1.27901	0.000224893	1
Tmpo	-0.144854	0.00174798	0.00560239		Wwc2	-2.59951	0.000226066	1
Psmg1	-0.239974	0.00229017	0.00704863		Gas1	3.33004	0.000230858	1
Pcbp2	-0.188484	0.00182004	0.00581699		Gm37009	1.08017	0.000233389	1
Gapdh	-0.264262	0.00188253	0.00599991		Rps6-ps3	-0.709673	0.000234941	1
Cyb5r1	0.230658	0.00236753	0.00724222		Fam111a	-5.06084	0.000238732	1
Stoml2	-0.209356	0.00214768	0.00667711		Ifit1	-5.23918	0.000238817	1
Tapbp	-0.253604	0.00201907	0.00634645		H1f0	-2.11548	0.000242664	1
Capzb	0.132658	0.00205742	0.00644923		Dnah11	4.18709	0.000245382	1
Rps5	-0.216151	0.00213137	0.00665301		Gsdmd	4.35701	0.000245525	1
Ube2v1	-0.201921	0.00213409	0.00665301		Anxa13	4.35701	0.000245579	1
Parva	0.218188	0.00229806	0.00704863		Prkg2	4.27455	0.000245579	1
Ptma	0.244175	0.00229404	0.00704863		F2r	4.50901	0.000245759	1
Cox14	0.254876	0.00271657	0.00809298		Mmp2	4.64652	0.000245849	1
Eif4a3	-0.116572	0.00225964	0.0070061		Ccdc80	1.94893	0.000251468	1
Pck2	0.161771	0.00227915	0.00704745		Mtpn	1.6396	0.000251661	1
Atp1b3	-0.319374	0.00315176	0.00919794		Fbn1	4.14128	0.000257981	1
Etf1	-0.18917	0.00254643	0.00764598		Ssr3	1.73141	0.00025799	1
Supt16h	-0.237924	0.00291976	0.00860838		Rps15a-ps7	3.64652	0.000261435	1
RTRAF	-0.199504	0.00248358	0.00753662		Tbce	3.5794	0.000265381	1
Ywhaz	0.146343	0.00241994	0.00736308		Pcdh7	1.71315	0.000265791	1
Hint1	0.196037	0.00252943	0.00761498		Pla2g4c	1.40008	0.000266274	1
H2bc14	-0.170603	0.0025073	0.00758842		Gm13268	1.3735	0.000266744	1
Nop56	0.147084	0.00251586	0.00759416		Dtnb	-1.13956	0.000268222	1
Asph	0.241522	0.00309808	0.00908717		Rps13-ps1	1.08212	0.000269243	1
Ppia	0.133825	0.00262992	0.00787596		Polr2l	1.30256	0.000273103	1
Rpl28	0.132084	0.00267675	0.00799521		Rps6-ps1	-0.757773	0.000273201	1
Lrp1	-0.168982	0.00277757	0.00824331		Tln1	1.42809	0.000280967	1
Bcl2l13	-0.259993	0.00355809	0.0102262		Rps3a3	-0.866464	0.000304573	1
Eif4b	-0.214585	0.00278148	0.00824331		Eid1	2.50901	0.000305626	1
Arl1	-0.294466	0.00358645	0.010256		Taf12	1.97558	0.000307075	1
Ywhae	0.101197	0.00289976	0.00857158		Frmpd4	-2.90978	0.000308543	1
Gba1	-0.250434	0.00363952	0.0103301		Hspe1-rs1	1.2833	0.000309885	1
Rpl8	-0.138143	0.00306099	0.00900153		Gm43942	1.55274	0.00031141	1
Anxa8	-0.212956	0.00390683	0.0109526		Mtch1	1.15392	0.000312864	1
Nme1	0.193185	0.00315197	0.00919794		Slc38a2	1.30256	0.000316849	1
Nme2	0.168599	0.00323217	0.00940793		Fam210b	3.09398	0.000326234	1
Tmem43	0.27615	0.00361831	0.0103048		Mndal	-2.83528	0.000334302	1
Psma7	-0.240576	0.00335094	0.00972882		Rpl28-ps1	-0.673869	0.000334979	1
Usp14	-0.178002	0.00353841	0.0101953		Steap1	2.50901	0.000342367	1
Atp6v1a	-0.148095	0.00340753	0.00986799		Dram1	-2.78254	0.000343143	1
Pafah1b3	-0.22801	0.00484345	0.0132527		Grm8	-2.98284	0.000343472	1
Otub1	-0.127951	0.00347928	0.0100503		Ccnb2	-2.2577	0.00035866	1
Ogdh	-0.166986	0.00357023	0.0102353		Gm3435	2.27455	0.000374554	1
F11r	0.276182	0.00362159	0.0103048		Fam178b	-0.709079	0.000375224	1
Mesd	0.169826	0.00380548	0.0107476		Ube2c	-2.27235	0.000381512	1
Fam3c	-0.356498	0.00436051	0.0120468		Cox7a2l	1.42412	0.000383107	1
Lamtor3	-0.272677	0.00492017	0.0134304		Septin11	1.01106	0.00038819	1
Ipo9	-0.233502	0.00383852	0.0108142		Pcsk5	1.4039	0.000401948	1
Prkcsh	0.213968	0.00371968	0.0105314		Ndufb2	1.2542	0.000402207	1
Nudt21	-0.165721	0.00408705	0.0114018		Pou2f3	-0.616326	0.000402261	1
Pdlim1	-0.212113	0.00408136	0.0114018		Atp5b	-0.883304	0.000407601	1
Bsg	-0.176867	0.00386836	0.0108714		H2ac12	-3.42762	0.000410573	1
Eif1	0.199414	0.00448869	0.012371		Atad2	-2.25349	0.000411041	1
Nasp	-0.163711	0.00412879	0.0114901		Eif3f	1.80376	0.000417089	1
Septin2	0.149437	0.00414782	0.011515		H2-T22	-4.51335	0.000419838	1
Dars1	-0.151525	0.00431365	0.0119463		Rps13-ps5	1.32459	0.00042794	1
Anxa2	0.195422	0.00452007	0.0124275		Rpl5	0.660155	0.000452239	1
Snrnp70	-0.140157	0.00474992	0.013028		Bsg	-0.479788	0.000459618	1
Mrpl12	0.291166	0.00502204	0.0136432		Ap2a2	1.45557	0.000460089	1
Ywhag	0.119097	0.00495257	0.0134866		Gm15796	1.33393	0.000463647	1
Aldoa	-0.146422	0.00505925	0.0137117		Rmdn2	-3.84266	0.000476912	1
Farsb	-0.167909	0.00589182	0.0157437		Gapvd1	-1.86736	0.000478382	1
Dync1i2	0.147855	0.00522919	0.0141387		Coro2b	3.99444	0.000495695	1
Pnp	-0.398228	0.00636527	0.0167731		Socs2	4.18709	0.000496414	1
Rars1	0.179433	0.00528238	0.0142487		Rps19-ps7	4.27455	0.000496774	1
Hk1	-0.167966	0.00551902	0.0148519		Gm13680	1.09193	0.000497106	1
Dhx15	-0.152352	0.00565369	0.0151785		Gm10039	0.912578	0.000516197	1
Stat3	0.242448	0.00706716	0.0185798		Arpp19	-0.658814	0.0005227	1
Rab1A	0.144943	0.00579754	0.0155282		Cavin1	2.18709	0.000525093	1
Lamp2	-0.193189	0.00590626	0.0157454		Col1a1	1.00707	0.000525123	1
Atp5mf	0.248137	0.00624039	0.0164821		Gm8054	1.28945	0.000526632	1
Ywhaq	0.219114	0.00613694	0.0162843		Alkbh5	2.11308	0.000527233	1
Prdx2	0.137153	0.00613233	0.0162843		Gm13623	1.16437	0.000529789	1
Itgb1	-0.154527	0.00622044	0.0164676		Rps12-ps3	3.64652	0.00053063	1
Snrpd3	-0.191726	0.00849497	0.0218415		Gm9512	1.74167	0.000535387	1
Vapb	0.219401	0.00925613	0.0236269		Mrpl34	3.50901	0.00053833	1
Pfkm	-0.30316	0.0094778	0.0241341		Srsf7	3.77205	0.000546472	1
Ezr	0.201953	0.00717331	0.0188155		Itch	2.07161	0.00054751	1
Fau	0.213444	0.00795367	0.0206723		Taf1c	2.01716	0.000568644	1
Prrc1	-0.340756	0.0108734	0.0270886		Cyb5a	1.33294	0.000571843	1
Rpl7	0.107445	0.00749433	0.0196124		Gm12174	1.0769	0.000572197	1
Hmgb1	0.193857	0.00773176	0.0201671		Cfh	3.64652	0.000582833	1
Eftud2	-0.114694	0.00774161	0.0201671		Cttn	3.24598	0.000599495	1
Atp5f1e	0.18869	0.00807979	0.0209049		Rpl19-ps1	1.95262	0.000601189	1
Snx2	-0.198388	0.00949712	0.0241341		Psmc3	1.29071	0.000608951	1
Tubb4b	-0.175686	0.0081282	0.0209825		Gm13408	1.16571	0.000612513	1
Snd1	0.130104	0.00807335	0.0209049		Rpl30-ps9	2.38872	0.000613053	1
Fen1	-0.329028	0.0118208	0.0290055		Cd151	2.62004	0.000614406	1
Hnrnpu	0.102747	0.00849925	0.0218415		Eef1d	0.899804	0.000616571	1
Mapre1	0.157907	0.0089902	0.0230513		Atad1	-0.866552	0.000620692	1
Psmc3	-0.175504	0.00958164	0.0242948		Ino80	-3.08593	0.000623421	1
Rrm1	-0.175305	0.00916807	0.0234546		Cald1	0.794768	0.000624646	1
Sae1	-0.176409	0.00992629	0.0250573		St3gal3	-0.680358	0.000633804	1
Tmx1	-0.461091	0.0124158	0.0302701		Cited2	1.65657	0.000664324	1
Snrpd1	-0.209663	0.0105882	0.0264358		Ywhab	1.08656	0.000665115	1
Sqor	0.238181	0.0120624	0.0294714		Ndufa6	-0.688288	0.000688982	1
Safb	0.315272	0.0135192	0.0326117		Rpl5-ps1	0.836329	0.000699526	1
Cmpk1	-0.151945	0.0100075	0.0252065		Dbi	-1.31844	0.00071702	1
Rps14	-0.171617	0.00968128	0.024493		F11r	1.74167	0.000718759	1
Cnbp	0.180756	0.0104825	0.0262587		S100a16	2.18709	0.000725389	1
Srsf10	-0.1481	0.0104943	0.0262587		Mlec	1.4601	0.000727719	1
Rigi	-0.18019	0.0112556	0.0278582		1700095J07Rik	-4.62027	0.000733448	1
Rps26	0.151615	0.0102688	0.0258078		Hemgn	-4.81291	0.000735401	1
Bag2	0.224548	0.0138525	0.0332238		Llph-ps2	2.18709	0.000743484	1
Cdv3	-0.161794	0.0108993	0.0270938		Cct7	1.40948	0.00075551	1
Hmgn1	0.230206	0.011518	0.0283846		Gm11518	1.46719	0.000757878	1
Puf60	-0.181657	0.0128481	0.0311909		Gm10420	0.958267	0.000763318	1
Tfam	0.205157	0.0134985	0.0326117		Ryr3	1.99444	0.000765986	1
Fkbp9	0.162745	0.0113169	0.0279494		Rps15a-ps4	1.22271	0.000779963	1
Prdx1	-0.205278	0.0111784	0.0277272		Anxa2	1.12199	0.000789772	1
Cox5b	0.164605	0.0118525	0.0290207		Tmem91	1.55387	0.000808642	1
Mprip	0.179265	0.0138166	0.0332238		Arf5	1.42809	0.00082996	1
S100a13	-0.187369	0.0132033	0.0319851		Rpl9-ps7	0.768196	0.000830688	1
Actn1	0.157093	0.0116946	0.0287576		Vkorc1	1.99444	0.000840289	1
Rpl37a	0.268125	0.014906	0.035359		1810037I17Rik	-1.53077	0.000843401	1
Hdac1	-0.199459	0.0153823	0.0362627		Snord104	2.60212	0.00084682	1
Ywhab	0.15476	0.0127919	0.0311207		Os9	3.60212	0.000849833	1
Vwa5a	-0.165856	0.0163613	0.0380986		Rps13	0.764743	0.000856769	1
Cand1	-0.136616	0.0139254	0.0332404		Sec61a1	2.18709	0.000858265	1
Rab5c	-0.12033	0.0138787	0.0332238		Gm6133	-0.480446	0.000870071	1
Vdac3	0.132302	0.0138894	0.0332238		Rpl13-ps3	0.618243	0.000872037	1
Gars1	0.153655	0.0145483	0.0346547		Rpl35a-ps5	1.806	0.000879	1
Dnaja2	-0.164567	0.0154508	0.0363493		Tmem59	1.07815	0.000884751	1
Rpl12	0.116121	0.0146847	0.0349068		Glipr2	1.77205	0.000886291	1
Eif3i	0.154621	0.0152591	0.0361217		Spag16	1.4021	0.000903495	1
Rps15	-0.266478	0.0213385	0.0482123		Rps26-ps1	-0.699413	0.00091258	1
Ktn1	-0.110591	0.0153328	0.036221		4933431K23Rik	1.08017	0.000922505	1
Hdgf	0.141719	0.0162573	0.0379337		Ndufa1	0.984269	0.000927498	1
Lmnb1	0.104073	0.0156508	0.036744		Rpl23	0.489009	0.000930304	1
Kars1	-0.129417	0.0157757	0.036961		Ahnak	1.05605	0.000934004	1
Paics	0.133841	0.0162356	0.0379337		Rpsa-ps10	0.840761	0.000938482	1
Lamp1	0.132668	0.0164291	0.0381606		Gm11942	-0.823484	0.000944419	1
Septin7	0.112267	0.0164549	0.0381606		H2az1	-1.26709	0.000954929	1
Dync1h1	0.0917605	0.0167441	0.0387526		Gm3362	0.637312	0.000965939	1
Sfxn3	0.182208	0.0171621	0.0395595		Sh3glb1	1.28945	0.000980376	1
Ctsd	0.16791	0.0171002	0.0394967		Gm6266	0.792454	0.00098678	1
Tpr	-0.118862	0.018639	0.0427049		Gm13056	1.95968	0.000991893	1
Hnrnph1	0.115117	0.0183968	0.04232		Ulbp1	4.18709	0.000996931	1
Ube2l3	0.20576	0.0185716	0.0426362		Gm4600	3.99444	0.000997146	1
Ipo5	-0.214013	0.0205457	0.0467916		Anapc2	4.09398	0.000997576	1
Arpp19	-0.183989	0.0227883	0.050784		Zcchc24	4.09398	0.000997576	1
Atp5pf	0.143132	0.019718	0.0450865		Camk2b	4.09398	0.000998007	1
Matr3	-0.1043	0.0197884	0.0451571		Ccn5	4.35701	0.000998007	1
Bak1	-0.144161	0.021902	0.0490965		Fndc7	4.09398	0.000998007	1
Myg1	-0.370428	0.0300672	0.0642448		Gm10180	-0.455089	0.00102405	1
Rps16	-0.137771	0.0206007	0.0468236		4930525G20Rik	0.524623	0.00102935	1
Hspe1	0.180469	0.0206688	0.0468848		Sqstm1	1.012	0.00106744	1
Pea15	-0.185518	0.021557	0.0484185		mt-Nd5	0.624544	0.00107008	1
Hnrnpd	-0.117894	0.0207484	0.046972		Arntl2	-2.81291	0.00107501	1
Usp5	-0.136447	0.0213994	0.0482543		Mbnl2	3.09398	0.00107727	1
Uqcr10	0.166317	0.0236038	0.0523969		Hotairm1	1.99444	0.00108189	1
Cnn3	0.187674	0.0215041	0.0483948		Gsn	1.08399	0.00109026	1
U2af1	-0.112835	0.0220918	0.0494251		Ccn4	3.27455	0.00109883	1
Adss2	-0.159359	0.0266377	0.0577615		Ndufb8	-0.761199	0.00111274	1
Arpc3	0.102316	0.025139	0.0551609		Csad	3.18709	0.00111467	1
Rps27l	0.191297	0.0325028	0.0686773		Gm13483	3.50901	0.00111515	1
Dpysl2	-0.105715	0.0225174	0.0502786		Exosc2	-1.90807	0.00112745	1
Hadh	0.153682	0.0257257	0.0562112		Gm13226	-0.744202	0.00113813	1
Timm50	-0.145293	0.0242683	0.053728		Gm7206	0.658092	0.00115962	1
Gbp2	-0.266595	0.0308818	0.065739		Cbx3	0.839162	0.0011641	1
P4ha1	0.0992163	0.0234162	0.0520816		Eif5a	0.949394	0.00118582	1
Aldh1a1	0.251067	0.0249136	0.0547716		Rps26	-0.389906	0.00119832	1
Tkt	-0.141158	0.0243001	0.053728		Zyx	3.30256	0.00120737	1
Eif3d	-0.104204	0.0243448	0.053728		mt-Rnr1	0.901504	0.00121765	1
Ckap4	0.101425	0.0245214	0.0540133		H1f4	-1.90038	0.00123961	1
Skp1	0.175145	0.0266415	0.0577615		Adgb	1.94197	0.00125968	1
Fxr1	-0.232399	0.0294882	0.0631259		Map1lc3b	0.801194	0.00126591	1
Gart	-0.170198	0.0383072	0.0786124		Plscr1	2.77205	0.00127934	1
Arpc5	0.249983	0.0279365	0.0601425		Hmgn3	-4.5678	0.00128271	1
Atic	-0.113768	0.0255289	0.0559088		Gm15793	2.68959	0.00129814	1
Hnrnpl	-0.101933	0.0257655	0.0562112		Gm10175	-0.867362	0.00129899	1
Hnrnpa2b1	0.10508	0.0260097	0.0566357		Ramp1	2.94197	0.00130191	1
Trmt112	0.167617	0.0325916	0.0687376		Rpl10	0.660573	0.00130723	1
Cdc37	-0.129837	0.0266786	0.0577615		Plk2	2.25747	0.00132264	1
Pitpnb	0.148609	0.034381	0.0717304		Paics	2.24598	0.00132532	1
Psmd2	-0.0907857	0.0274096	0.0592318		Rpsa-ps12	0.710648	0.0013344	1
Capns1	0.160999	0.0280208	0.0602105		Ppp3ca	0.684205	0.0013408	1
Rpl32	0.0829763	0.0278293	0.060025		Gm5619	2.14128	0.00135189	1
Iars1	0.102212	0.0291827	0.0625893		Ctla2a	2.18709	0.00136106	1
Plod1	-0.295849	0.0362146	0.0748566		Serp1	2.08017	0.0013624	1
Rpl36a	0.0944953	0.0310465	0.0659665		Cnn3	1.83916	0.00136383	1
Elob	-0.122416	0.0307666	0.0656163		Rps9	0.432349	0.00137641	1
Nans	-0.164314	0.0366294	0.0755771		Rpl7a	1.01306	0.00138159	1
Tra2a	0.127777	0.0342831	0.0717304		Gm10076	-0.341533	0.00138356	1
Atxn10	0.140663	0.0319755	0.0678142		Gm6311	1.27455	0.00138418	1
Tardbp	-0.10662	0.0320572	0.0678613		Gm12727	2.09398	0.00140537	1
Abce1	-0.120148	0.0358279	0.0741917		Gm11077	1.77205	0.00142151	1
Psma6	-0.166697	0.034321	0.0717304		H2az2	-0.945597	0.00143375	1
Sod2	0.178088	0.0497094	0.0981287		Sdf2l1	2.09398	0.00143477	1
Rhoa	0.113269	0.0337901	0.0711338		Gm43243	1.43862	0.00143953	1
Msn	-0.116507	0.0339078	0.07125		Gpx8	1.10765	0.00143976	1
Csrp1	-0.127279	0.0343878	0.0717304		Selenof	1.47249	0.0014454	1
Vcam1	0.243256	0.0393447	0.0802653		Mgst1	1.05445	0.00144952	1
Acadvl	0.122536	0.0355099	0.0738011		Mthfd2l	1.46719	0.00146299	1
Gmps	-0.16195	0.043245	0.0871777		Gm17938	-0.831898	0.00146925	1
Psmc1	-0.103954	0.0354097	0.0737271		Sptbn1	1.46462	0.0014791	1
Aimp1	0.172356	0.0380755	0.0782778		Slc35f3	1.16363	0.00150784	1
Anxa5	0.110047	0.0356849	0.0740299		Stard9	-0.89849	0.00151385	1
Prmt1	-0.134871	0.0374951	0.0772237		Rexo2	1.39859	0.00151811	1
Cyfip1	-0.124428	0.042075	0.0851951		Gm7816	1.68959	0.0015202	1
H2az1	-0.155923	0.0393846	0.0802653		Cdk6	1.48254	0.00152308	1
M6pr	0.198106	0.0401224	0.0816035		Gm5905	0.444473	0.00153618	1
Ide	0.172443	0.0557473	0.108731		Ifi35	-3.30477	0.00154794	1
Rnh1	-0.117321	0.039394	0.0802653		Gm12678	-3.9422	0.00154911	1
Psap	-0.163942	0.0385876	0.0790456		H4c12	-1.68738	0.00157531	1
Dnpep	-0.233651	0.0548337	0.107132		Gm35315	-3.71981	0.00159292	1
Taldo1	-0.119593	0.0401938	0.0816035		Mrpl51	-1.56424	0.0016285	1
Cltb	-0.109196	0.0421122	0.0851951		Txn1	-0.449166	0.00164188	1
Pycr3	-0.136093	0.0510206	0.100543		Atpif1	0.575983	0.00166206	1
Pcbp1	0.133034	0.0440215	0.0885864		Rpl17	-0.40488	0.00167061	1
Psma4	-0.266012	0.058871	0.113658		Cox7c	-0.567158	0.00168677	1
Galk1	-0.126552	0.0466178	0.0934813		Gm3379	0.631186	0.00168955	1
Ahsa1	-0.176122	0.0634889	0.120735		H13	1.23148	0.00170867	1
Etfb	0.0973233	0.0423596	0.0855439		Gm12766	2.24598	0.0017157	1
Gnl1	0.165332	0.0541846	0.106046		Gm3226	-0.754239	0.00171749	1
Ugdh	-0.123257	0.0471308	0.0941954		Spc25	-1.59951	0.00172476	1
Tsc22d1	0.152322	0.0593107	0.114265		Gm7638	0.57636	0.00173352	1
Esd	-0.179913	0.0476551	0.0949074		Adrm1	1.53501	0.00174043	1
Fus	0.127596	0.0442989	0.0889878		Rps13-ps4	0.805215	0.00175195	1
Cops2	0.133976	0.049498	0.0978808		Ankrd1	-3.35723	0.00175637	1
Ctsz	0.137114	0.047139	0.0941954		Rere	-0.672384	0.00176786	1
Gorasp2	-0.164399	0.0565012	0.109895		Olfr77	-0.632342	0.00177426	1
Nherf1	0.138026	0.0476617	0.0949074		2310039H08Rik	1.40948	0.00177437	1
Copz1	0.177804	0.0668113	0.125381		Rps2-ps6	1.7176	0.00179895	1
Hmgcs1	-0.173089	0.0664156	0.125256		Cd2ap	0.865157	0.00182437	1
Smarca5	-0.105794	0.0528227	0.103736		Gm8865	1.1305	0.00182485	1
Rpl13a	0.0841984	0.048559	0.0965257		Tuba1c	-0.672984	0.00183014	1
Ctsb	0.126774	0.0493562	0.0977698		Nrp2	3.09398	0.00185524	1
Acat1	-0.124077	0.0490483	0.0973289		Rpl41	-0.340181	0.00186193	1
Hnrnpf	-0.0854181	0.0511966	0.100716		Poldip2	1.81935	0.00186755	1
Plp2	-0.336856	0.0597334	0.114588		Gm48690	0.890104	0.00187744	1
Pafah1b1	-0.129198	0.0572718	0.111135		Gm15286	-0.397023	0.00191349	1
Nop2	-0.160746	0.0583772	0.112896		Rps12-ps4	2.94197	0.0019325	1
Rab11b	0.111992	0.0535445	0.104973		Rpl28-ps3	-0.634066	0.00193629	1
Prpf19	-0.116717	0.0576888	0.111754		Fbln2	0.841311	0.0019428	1
Lamc1	-0.12813	0.0598509	0.114588		Ush2a	2.13462	0.00194905	1
S100a11	0.210166	0.0565365	0.109895		Cox8a	-0.418736	0.00195694	1
Pdcd5	-0.160825	0.0816028	0.147324		Parva	1.71433	0.00197381	1
Rab5b	-0.170863	0.0743022	0.138076		Adck1	0.802422	0.00199061	1
Ogfr	-0.146681	0.0678126	0.127051		Adra1b	3.88753	0.00199332	1
Rpl27a	0.125394	0.0593858	0.114265		Cdsn	3.64652	0.00199332	1
Eif4g1	-0.106851	0.059855	0.114588		Fbxo47	3.64652	0.00199332	1
Tpm2	0.157697	0.0622966	0.118665		Gm9619	3.64652	0.00199332	1
Dhx9	-0.121412	0.0612974	0.117153		Fgf10	4.18709	0.00199545	1
Ralb	-0.137507	0.0642165	0.121713		Maea	4.09398	0.00199545	1
Cycs	0.109849	0.0621292	0.118544		N6amt1	3.88753	0.00199545	1
Coro1c	-0.113829	0.0636197	0.120782		Sf3b4	3.88753	0.00199545	1
Cops4	0.0943642	0.0666253	0.125381		Mbd4	4.35701	0.00199688	1
Plin3	0.123121	0.0745768	0.138361		Zwilch	-0.787151	0.0020116	1
Nap1l1	0.104742	0.0667398	0.125381		Snrpb2	1.57411	0.00201519	1
Ak2	-0.11503	0.0656747	0.12427		Cd247	2.02359	0.00201911	1
Atp5pd	0.0762973	0.0662221	0.125098		Asap1	1.18709	0.0020236	1
Dynlrb1	-0.124397	0.0708304	0.132271		Palld	2.40948	0.00204126	1
Prpf8	-0.12926	0.0773935	0.142554		Rps6	-0.606824	0.00212818	1
Mif	0.172404	0.0687236	0.128547		Bud31	1.92405	0.00214387	1
Ccdc47	0.115281	0.0894109	0.159403		Rtraf	-1.62027	0.00218906	1
Pdcd6	-0.116411	0.0818135	0.147471		Elk3	3.35701	0.00219645	1
Ppp2cb	0.105493	0.0722756	0.134749		Aldh1a1	1.96469	0.00220398	1
Sec13	-0.0953987	0.0725957	0.135125		Gm11425	3.09398	0.00222734	1
Sdhb	0.13403	0.0793519	0.144403		Rsad2	-4.85731	0.00222785	1
Aifm1	0.107212	0.077096	0.142554		Zfp991	2.64652	0.00223834	1
Cat	-0.144464	0.0979375	0.172449		Rpl13-ps1	0.834784	0.00224276	1
Ilf3	-0.104734	0.0906047	0.161052		Aldoa	0.905315	0.00225715	1
Gstm2	0.0984586	0.076253	0.141241		Gm49164	2.99444	0.00225851	1
Sqstm1	-0.130199	0.112246	0.193462		Hadh	2.99444	0.00225851	1
Hexb	-0.121624	0.0840334	0.150285		Gm32256	1.23148	0.00230224	1
Myef2	-0.0945287	0.0792395	0.144403		Ston1	2.40948	0.00230474	1
Ptgis	0.120049	0.077881	0.142865		Itga9	-0.658192	0.00231001	1
Scarb2	-0.105304	0.078088	0.143002		Srpk2	-1.31771	0.00231531	1
H2ac20	-0.119679	0.0773979	0.142554		Anxa5	0.968445	0.00232906	1
Srrt	-0.0965152	0.0831649	0.149435		2610301B20Rik	1.23015	0.00233583	1
Hdlbp	0.0733628	0.0775819	0.142554		Gm35769	0.642413	0.00234086	1
Ruvbl2	-0.0791657	0.0775863	0.142554		Gm8599	2.27455	0.00235578	1
Eef1a1	0.112684	0.078206	0.143002		H2ac4	-2.2577	0.00238484	1
Ero1a	-0.118165	0.0906182	0.161052		Tagln2	1.50901	0.00240432	1
Rpl3	0.0638801	0.0792249	0.144403		Sox5	2.85005	0.00243778	1
Eef2	0.0906301	0.0795584	0.144548		Gm48202	0.979281	0.00244028	1
Eif3e	0.0872424	0.081596	0.147324		Gm9083	1.09855	0.00246257	1
Cacybp	-0.127823	0.0838458	0.150185		Igf1r	2.18709	0.00246602	1
Vdac1	0.108323	0.0803504	0.145755		Rpl39	0.631748	0.00250001	1
Cct3	-0.0861577	0.0805958	0.145968		Rps2	0.531324	0.00251054	1
Scp2	0.137598	0.108191	0.187608		Gm35558	-0.727037	0.00251476	1
Rack1	-0.0706103	0.0823212	0.148152		Psma7	0.533176	0.00253153	1
Psmd14	-0.0921557	0.0865163	0.154484		Sec61g	0.600025	0.00253988	1
Vcl	-0.0734871	0.0837208	0.150185		Cav1	1.38872	0.0025519	1
Txn2	0.18036	0.111505	0.192477		Ndufs5-ps	-0.928392	0.00256803	1
Gaa	-0.10883	0.0926338	0.164123		Gm7143	0.59294	0.00257382	1
Golim4	-0.14679	0.117498	0.201905		Aoc3	2.50901	0.00258814	1
Aldh1l2	-0.140445	0.124326	0.211725		Gm7870	2.50901	0.00258814	1
Cfl1	0.141953	0.0913622	0.162122		Ucp2	2.50901	0.00258814	1
Pdlim5	0.133523	0.0949384	0.167685		Sag	-3.1057	0.00262418	1
Ctnnb1	-0.168347	0.139579	0.232835		Gm13215	2.40948	0.00262541	1
Hnrnpll	-0.120782	0.145627	0.241161		Gm8557	2.40948	0.00262541	1
Aprt	-0.172376	0.103673	0.18115		Slit3	1.52051	0.00264037	1
Vat1	-0.071491	0.0949082	0.167685		Pdcd5	-1.32598	0.00264483	1
Eif5b	-0.114749	0.124287	0.211725		Gm14305	2.30256	0.00266169	1
Txnrd1	-0.14955	0.105264	0.183089		Ppil1	2.18709	0.00269695	1
Rps7	-0.115522	0.0960159	0.169326		Gm6218	0.663524	0.00270266	1
Rsl1d1	0.109337	0.111479	0.192477		Tmem50a	0.99444	0.00274321	1
Rpl10	0.091424	0.102266	0.17924		Gbp3	-3.76711	0.00276808	1
Acadl	-0.144657	0.106372	0.184735		Lmna	0.782695	0.00277474	1
Slc48a1	-0.190826	0.12765	0.216416		Uqcrb	-1.07774	0.00278859	1
Atp5f1d	0.108314	0.100239	0.176229		Zfpm2	0.926494	0.00280148	1
Rcc2	-0.112623	0.137612	0.229891		Lgals1	0.326605	0.00284169	1
Cct7	-0.0789361	0.101508	0.178185		Cep85	-3.5678	0.00284629	1
Actr3	0.062052	0.102518	0.179406		4930415O20Rik	-3.71981	0.00285814	1
Aco2	-0.0762557	0.10431	0.181985		AA465934	-2.62027	0.0028643	1
Snu13	-0.123181	0.104815	0.182586		Ssbp1	1.09782	0.00287259	1
Rab1b	-0.131798	0.118364	0.202479		Gm9794	0.451849	0.0028977	1
Hmox2	-0.219112	0.151326	0.247368		Etl4	-1.5262	0.00289805	1
Lima1	0.0975752	0.110715	0.191693		Gm6663	2.50901	0.00290997	1
Nedd8	-0.112631	0.14013	0.233414		Dipk1a	-3.35723	0.00292781	1
Fkbp1a	0.112224	0.124184	0.211725		Eif1ax	1.38502	0.00295077	1
Tor3a	0.167805	0.159558	0.257627		Spag5	-0.459277	0.00296355	1
Cbx5	-0.0814512	0.114026	0.196235		Tgfbr3	1.71065	0.00300227	1
Usp39	-0.152519	0.146395	0.241732		Cyb5r3	0.891101	0.00302343	1
Sec22b	0.0900312	0.118181	0.202479		2610005L07Rik	-1.78254	0.00304806	1
Hspa9	0.0799645	0.11836	0.202479		H1f5	-1.97797	0.00306611	1
Igf2bp1	-0.131625	0.173279	0.275748		Gm21781	-1.05258	0.00311313	1
Gpd2	-0.216144	0.175848	0.278671		Cox6b1	-0.381198	0.00312201	1
Ilf2	-0.126984	0.148695	0.244822		Twf1	1.70166	0.00312562	1
Psmb7	-0.0766907	0.137112	0.229392		Rps18-ps1	0.885057	0.00313402	1
Tmbim6	0.150664	0.172227	0.274841		H1f2	-2.05392	0.00314219	1
Dctn2	-0.12778	0.13136	0.221064		Timp2	1.34628	0.00318427	1
Cstb	0.108413	0.125755	0.213841		Ddx60	-2.98284	0.00319445	1
Nop58	-0.0894984	0.134413	0.225538		Shisa5	-2.87181	0.00320466	1
Rab14	0.0866407	0.128669	0.217498		Gm5121	0.802422	0.00326607	1
Hadha	0.102834	0.127322	0.216182		Gm15500	0.604725	0.00326865	1
Rpl9	-0.0864087	0.128007	0.2167		Pdrg1	1.66102	0.00329104	1
Dcakd	0.145628	0.163765	0.26392		Aco2	2.63187	0.00333906	1
Surf4	-0.0991952	0.155452	0.252306		Il31ra	-0.682211	0.0033717	1
Psmb3	-0.192697	0.19661	0.306465		Tm2d1	-2.62027	0.00338539	1
Tars1	0.0699471	0.130984	0.220994		Gm9118	1.50901	0.00345211	1
Ranbp1	-0.0799302	0.132147	0.222062		Hells	-1.75151	0.00345448	1
Ddb1	-0.0694039	0.131124	0.220994		Afm	0.292085	0.00348972	1
Anp32a	0.105512	0.156774	0.254089		D130043K22Rik	-2.64299	0.00349135	1
Gnas	-0.101878	0.136949	0.229392		Rfc1	-0.609751	0.0036225	1
Psmd1	-0.0898541	0.159217	0.257627		Hspb1	-2.51335	0.00362511	1
Hadhb	0.111814	0.147579	0.243335		Gm11249	0.761322	0.00365824	1
Cast	-0.0920198	0.199804	0.310594		Slc9a3r1	1.58563	0.00369491	1
Eif6	-0.141417	0.166201	0.267469		Gadl1	0.859921	0.00369956	1
Rpl11	0.0743207	0.141903	0.236022		Gm7691	-0.506719	0.00370818	1
Rpl14	0.0633781	0.142212	0.236192		Sdf2	2.04507	0.00372799	1
Syncrip	-0.0614548	0.144144	0.239053		Gm37070	1.88753	0.00375883	1
Sec63	0.111409	0.173862	0.27629		Cox4i1	-0.819457	0.00377652	1
Ctnna1	-0.0925556	0.154879	0.251734		Scd2	1.20268	0.00382704	1
Magoh	-0.0920113	0.146352	0.241732		Cyba	-4.45677	0.00385061	1
Ptges3	-0.0993309	0.149713	0.246143		Cystm1	-4.39788	0.00385191	1
Rdx	0.0891112	0.168781	0.270477		Memo1	2.77205	0.00386606	1
Aars1	-0.0821013	0.150949	0.247106		H4c9	-1.83398	0.00390122	1
Rps23	0.0925762	0.150406	0.246782		Oip5os1	1.83916	0.00396961	1
Rplp0	-0.0583875	0.150535	0.246782		Daam2	3.64652	0.0039719	1
Tpi1	0.0925621	0.151636	0.24752		Gm12166	3.50901	0.0039719	1
Ganab	0.0589875	0.152224	0.248125		Gm2117	3.35701	0.0039719	1
Cltc	-0.0448711	0.152612	0.248402		Mgst2	3.35701	0.0039719	1
Sec23b	-0.137759	0.187742	0.294654		Fer	3.50901	0.00397585	1
Mthfd1l	0.123883	0.192355	0.301065		mt-Atp6	3.50901	0.00397585	1
Akr1b8	0.0872985	0.181049	0.286118		Ganc	3.88753	0.00397613	1
Cars1	-0.0846533	0.237507	0.355232		Pdia4	1.39654	0.00397776	1
Nono	0.0755033	0.159634	0.257627		Ccdc86	3.64652	0.00397783	1
Ifitm3	-0.11931	0.170139	0.271889		Efna5	3.64652	0.00397783	1
Tm9sf4	-0.122915	0.251224	0.367967		Npas2	3.64652	0.00397783	1
Fundc2	0.124752	0.21699	0.329674		Wnt4	3.77205	0.00397783	1
Psmd5	-0.0888655	0.190188	0.298083		Ppp2r3d	3.77205	0.00397868	1
Gls	0.124879	0.174253	0.276526		Wt1	4.09398	0.00397868	1
Tmod3	0.169905	0.215351	0.328058		Prg4	4.43501	0.00397896	1
Dab2	-0.155224	0.252317	0.369095		Flrt2	3.99444	0.00397953	1
Cops8	0.0726151	0.193259	0.302066		Pla2g4a	3.88753	0.00397953	1
Uggt1	-0.0753272	0.172472	0.274847		Rcn1	1.77205	0.00401045	1
Drg1	0.110729	0.221161	0.335119		Ssna1	1.18709	0.00401746	1
Psmd11	0.060259	0.168263	0.270405		Rps2-ps8	1.294	0.00404127	1
Clic4	-0.058571	0.168541	0.270471		Pdia6	1.15907	0.00406111	1
Elavl1	-0.0642087	0.169538	0.271309		Sil1	0.954912	0.00407012	1
Glrx	-0.0953989	0.256952	0.37366		Ak1	1.34755	0.00407915	1
U2af2	-0.0780681	0.180494	0.285636		Itm2c	2.77205	0.00408937	1
Sf3a2	-0.0860408	0.24287	0.360357		Ddx17	2.10765	0.00416497	1
Chmp4b	-0.0774502	0.184518	0.290793		Resf1	2.62004	0.00420181	1
Rpl35	0.111458	0.213976	0.327275		Pawr	2.31637	0.00420323	1
Lta4h	-0.14875	0.240354	0.358958		Gm5850	1.7176	0.00426465	1
Glrx3	0.103262	0.200548	0.311327		Dmkn	-1.91528	0.00426664	1
Rcn3	-0.112984	0.185506	0.291547		Gm7434	3.27455	0.00429372	1
Prdx4	0.0846978	0.19838	0.308802		Il1rapl1	3.77205	0.00429695	1
Rpl17	0.062642	0.182761	0.288424		Prdx6	1.26801	0.00430286	1
Slc16a1	0.214951	0.270313	0.389921		Rpl10a	0.629396	0.00432927	1
Tm4sf4	0.120145	0.247836	0.364792		Tmem263	3.18709	0.00435787	1
Actr1a	-0.117982	0.205464	0.316375		Bcl7b	2.32459	0.00436848	1
Sparc	0.0751423	0.185095	0.2913		Tex261	3.09398	0.00442092	1
Tpd52l2	0.0900647	0.228935	0.345522		Ddx3y	-0.853178	0.00442886	1
Ppa1	-0.0837312	0.195359	0.304932		Maco1	-1.41331	0.00442918	1
Eci1	0.105228	0.201862	0.312942		Ndufb1-ps	-1.05772	0.00445111	1
Parp1	-0.0841059	0.245956	0.363047		Cpa3	2.18709	0.004474	1
Fis1	0.0924585	0.311988	0.43465		Gm11196	2.18709	0.004474	1
Erp29	0.0862876	0.204071	0.315508		Tmem242	1.53104	0.00451226	1
Hars1	-0.0579583	0.205333	0.316375		Nfix	1.50901	0.00453247	1
Ptgs1	0.0998981	0.21029	0.322936		Fam107b	2.77205	0.0045432	1
Sf3b1	-0.072587	0.203354	0.314826		Hmga2	2.4601	0.0045477	1
Hp1bp3	0.100203	0.314756	0.437972		Msi2	3.12569	0.00461734	1
Oxct1	-0.0741942	0.20505	0.316375		Med15	-0.559069	0.00462041	1
Cops7a	-0.184491	0.302511	0.424036		Rps15a-ps5	1.0651	0.0046342	1
Mtap	0.0613507	0.212866	0.326014		Grcc10	1.60212	0.00464503	1
Rpl13	0.0768173	0.20849	0.320603		Hspd1	0.905904	0.00465645	1
Arf5	0.0957486	0.219645	0.333265		Mir6236	1.5215	0.00467775	1
Dnm2	0.0820062	0.24975	0.366279		Phlda3	1.33393	0.00470355	1
Cct8	-0.0476303	0.212351	0.325661		Gm4076	1.00266	0.00472097	1
Ptpn11	0.0913739	0.306789	0.427929		Gm12338	-0.639498	0.00473147	1
Sap18	0.0577079	0.216282	0.329036		Dad1	0.632497	0.00473723	1
Atl3	-0.0968857	0.23129	0.348615		Ermard	2.99444	0.00476512	1
H1-3	-0.0937872	0.215124	0.328058		Dnajc25	1.15794	0.00477743	1
Rpl18	0.0591756	0.215238	0.328058		Wipi1	2.11308	0.00478509	1
Arpc1b	0.0709092	0.22893	0.345522		Anapc13	0.789122	0.00482291	1
Mlec	-0.0733431	0.247127	0.364304		Jak1	0.695427	0.00486781	1
Ugp2	-0.078983	0.234247	0.351581		Anp32a	0.946077	0.00488207	1
Hsph1	0.0786541	0.285755	0.406541		Commd3	1.42809	0.00489342	1
Rpl36	0.0639874	0.224631	0.339925		Nhs	2.02359	0.0049171	1
Ubap2l	-0.0942014	0.293616	0.415137		Ezr	1.36396	0.00491817	1
Mcfd2	0.122189	0.318606	0.440734		Rars	1.30908	0.00494985	1
Umps	-0.0957765	0.303765	0.42527		Ndufc1	-0.679059	0.00496544	1
Ewsr1	0.0699637	0.255961	0.373467		Flacc1	2.50901	0.00497556	1
Oat	0.0798477	0.237548	0.355232		Gm13212	-3.5678	0.0049822	1
Blvra	-0.0801199	0.268367	0.388587		Limd2	2.60212	0.00504227	1
Erp44	-0.0674496	0.232458	0.349913		Gm48825	-0.414812	0.00507798	1
Plxnb2	-0.0747965	0.289159	0.409852		Zfp568	0.667078	0.00509928	1
Cd44	-0.0952102	0.257075	0.37366		Foxp1	1.35701	0.00510658	1
Cops6	0.0632216	0.282771	0.402799		Lbp	2.30256	0.00511944	1
Hnrnpa1	0.0513089	0.233364	0.350814		Tpm1	0.621488	0.00512727	1
Asns	-0.080636	0.23449	0.351581		Luzp2	1.08017	0.00515548	1
Ubqln2	-0.0673202	0.244369	0.36164		Rhd	-1.33317	0.00516577	1
Chd4	-0.147608	0.335258	0.457571		Gm12643	1.62766	0.00524194	1
Sf3a1	-0.111447	0.296827	0.419158		Rpl7	0.510262	0.00529732	1
Mvp	-0.0703981	0.241132	0.35918		Pdap1	0.567907	0.00531438	1
Nsfl1c	0.0655811	0.256862	0.37366		Gm1673	-3.08593	0.005322	1
Gnai3	-0.0849222	0.336897	0.458711		Soat1	0.860857	0.00537381	1
Rps21	0.0603163	0.242383	0.360357		Gm12350	-1.93845	0.00540058	1
Atp5f1a	0.0548131	0.241006	0.35918		Dct	1.54966	0.00554028	1
P4ha2	-0.0665211	0.24265	0.360357		Gm12990	0.783189	0.00555168	1
Ola1	0.0699501	0.243975	0.361527		Hdac9	0.29904	0.00557081	1
Me1	-0.0766468	0.302414	0.424036		Gm10240	0.618802	0.00566879	1
Sf3a3	-0.0924579	0.275086	0.394312		4930586N03Rik	-2.81291	0.00568952	1
Psma2	0.0719346	0.396066	0.520036		Rpl36a-ps3	0.723138	0.00575375	1
Uap1l1	-0.0569462	0.248097	0.364792		Rps12-ps17	1.30256	0.0057662	1
Rps18	-0.0785149	0.245461	0.362787		Npm1	0.56497	0.00580895	1
Echs1	0.0884804	0.300844	0.423259		Gng12	1.10269	0.00580972	1
Gatm	-0.0670298	0.351876	0.474015		Metap1d	2.30256	0.00581209	1
Anp32b	0.0693929	0.248828	0.365396		Sec31a	1.67251	0.00582046	1
Ruvbl1	-0.0654027	0.269237	0.389102		Ctnnbip1	-2.62027	0.00585127	1
Jpt2	0.0842274	0.36488	0.487503		Mrpl42	-0.268744	0.00585488	1
Pls3	-0.0736637	0.326687	0.448556		Rgs10	1.86516	0.00600683	1
Nucb1	-0.0728991	0.298844	0.420964		Gmnc	1.65421	0.0060185	1
Gng12	0.106376	0.39093	0.51507		Atrx	1.06155	0.00602947	1
Gfus	0.0743175	0.342249	0.463785		Arl6ip5	1.27455	0.00604715	1
Rpl10a	0.0488873	0.254833	0.372297		Gm9774	2.32459	0.00606257	1
Impa1	0.080152	0.348499	0.471135		Pdlim5	1.33909	0.00606308	1
Pfdn6	-0.0712862	0.339971	0.461245		Mir100hg	2.24598	0.00607019	1
Idh1	-0.0658207	0.280947	0.401083		Calu	0.924051	0.0061326	1
Eif3g	0.0616281	0.269404	0.389102		Tpi1	0.841311	0.00614278	1
Rps11	-0.0570827	0.261096	0.37902		Leo1	-0.941239	0.00623388	1
Rpsa	0.053806	0.26362	0.382199		Tbca	-0.558342	0.00624235	1
Dlst	-0.0742205	0.287323	0.408263		Psme2b	-1.50999	0.00627679	1
Strap	0.0708197	0.287987	0.408698		Gm6185	-1.8833	0.00632956	1
Cpne3	-0.0842658	0.290984	0.411926		Rp9	-2.23918	0.00634466	1
Sf3b6	0.0586185	0.377776	0.500631		Ywhaz	0.865157	0.00642269	1
Pafah1b2	-0.157183	0.306188	0.427614		Fen1	2.23771	0.0064421	1
Prdx6	0.057895	0.272408	0.392121		Srrm1	-1.40985	0.00645501	1
Mdh2	0.066783	0.272526	0.392121		Rpl35	0.312616	0.00651669	1
Ppp2r1a	-0.036237	0.273386	0.392863		Rpl23a-ps3	1.0427	0.0065236	1
Rpl31	0.0615638	0.274656	0.394192		Psme2	-1.39788	0.00656669	1
Rps8	0.0628419	0.276004	0.395132		Coa7	-4.06084	0.00663536	1
B2m	-0.0715755	0.324105	0.446622		Gm3571	-3.81291	0.00664058	1
Shmt2	0.0444097	0.280017	0.400375		Fdps	-3.71981	0.00664394	1
Gnb2	0.0650896	0.281215	0.401083		H2-T10	-3.81291	0.00664506	1
Dazap1	0.0669638	0.421093	0.544747		Homer2	-4.51335	0.00664618	1
Bag6	-0.0672416	0.409566	0.534075		Asxl3	0.505615	0.00666033	1
Rer1	0.0622338	0.320743	0.44306		Aox2	1.92405	0.00666197	1
Gmfb	-0.0914678	0.419532	0.543344		Smim10l1	1.23148	0.00669438	1
Gcn1	0.0685949	0.366275	0.488795		Gm49017	1.38872	0.00670085	1
Pitrm1	-0.0530643	0.318672	0.440734		Ppp1r9a	0.602123	0.00679374	1
Lrpprc	-0.0585518	0.298294	0.420709		Psip1	-2.71981	0.00681339	1
Arf4	-0.0512776	0.305741	0.427513		Prickle1	-1.21379	0.00692578	1
Pgam1	0.0622971	0.302	0.424036		Smc4	-1.43584	0.00695111	1
Gsto1	0.0719799	0.465466	0.589452		Gm11703	1.04958	0.00696987	1
Nolc1	-0.0640804	0.317663	0.440734		Stau1	-0.873456	0.00707034	1
Fh	0.0635448	0.332315	0.454097		H2ac6	-1.86736	0.00707106	1
Mars1	0.0715506	0.504986	0.625613		Diaph3	-2.9422	0.00707255	1
Naga	-0.0637442	0.508035	0.62747		Birc5	-1.46742	0.00710662	1
Ybx3	-0.0636221	0.469142	0.593449		Gm14541	1.68959	0.0071172	1
Eif4e	0.0708686	0.397411	0.521202		Nhp2	1.42155	0.00716496	1
Ppic	-0.0737362	0.45389	0.578647		Pard3b	-1.5823	0.00719324	1
Ssb	-0.0415748	0.315303	0.438198		Myo3a	-0.440521	0.0072115	1
Lman2	0.0608989	0.321338	0.443345		Psmb1	0.63187	0.00723776	1
Dld	-0.0647713	0.387166	0.510701		Wdr45b	0.912911	0.00725983	1
Psmd12	-0.0550501	0.360143	0.481739		Vmp1	0.772048	0.00728532	1
Tubb5	0.0473686	0.318519	0.440734		Lgals9	-2.21146	0.00728547	1
Lmtk3	0.0606551	0.572331	0.681659		Txnrd1	2.71065	0.00729208	1
Rbm8a	-0.0591687	0.324867	0.447133		Guk1	1.32459	0.0073112	1
Txnl1	-0.0548821	0.325778	0.447846		Gm42977	1.60212	0.00731247	1
Rps17	-0.0733499	0.338172	0.459455		Gm18025	0.748201	0.00732066	1
Hnrnpa3	0.0541139	0.327855	0.449619		Cpe	1.73141	0.00738277	1
Nmt1	-0.0564949	0.355243	0.476862		Sp3	1.36542	0.00741929	1
Rps10	-0.0454668	0.3301	0.452153		Timm8b	-0.988001	0.00742659	1
Abcf1	-0.0535162	0.394172	0.518743		Pebp1	0.857517	0.00745164	1
Atp1a1	-0.039263	0.331301	0.453255		Bola2	1.04024	0.00747303	1
Hsd17b10	-0.0767101	0.508685	0.62747		Cdk8	1.15314	0.00747418	1
Srsf5	0.0496234	0.36907	0.491375		Atp2a2	2.60212	0.00748249	1
Banf1	-0.0513313	0.336204	0.458313		Rpl36-ps3	2.60212	0.00748249	1
Bub3	-0.0615984	0.404832	0.529718		Tmem63b	2.99444	0.0075005	1
Rps19	-0.0628511	0.338249	0.459455		Lrrc58	1.88753	0.00750737	1
Tpp2	-0.0859748	0.574217	0.683193		Mageb18	1.50901	0.00754751	1
Dut	-0.0470064	0.614038	0.717964		mt-Te	1.5656	0.00754751	1
Ddx17	0.0468636	0.359648	0.481641		Tmem116	-2.71981	0.00755609	1
Uba2	-0.0488767	0.377451	0.500631		Rpl35a-ps3	1.37151	0.00763079	1
Anxa4	-0.0477382	0.346344	0.468777		Ahcyl1	2.06155	0.00764181	1
Fkbp3	-0.0568704	0.435532	0.560882		Esr1	2.40948	0.0076679	1
Psmd7	-0.0418958	0.355021	0.476862		Gm12468	0.811576	0.00766958	1
Rab18	-0.0498727	0.508383	0.62747		Agpat5	2.50901	0.00769027	1
Sfxn1	0.0507341	0.449171	0.573913		Gm10177	0.620214	0.00769918	1
Serbp1	0.0678677	0.350943	0.473877		Ccnd3	1.5656	0.00771195	1
Arhgdia	0.0601438	0.353788	0.476028		Sra1	1.13978	0.00773661	1
Slc3a2	0.0524086	0.351836	0.474015		Rpsa-ps2	0.745081	0.00776869	1
Rab6a	0.0940691	0.412937	0.537855		Mettl3	-1.76711	0.00776885	1
Sh3gl1	0.0406278	0.526768	0.641337		Arhgap12	-1.05955	0.0077771	1
Arpc4	0.0434617	0.359041	0.481393		Ndufa12	-0.447043	0.00788471	1
Plod2	-0.089757	0.474742	0.598164		2310011J03Rik	3.35701	0.00790987	1
Timm8a2	0.0481899	0.581621	0.689128		Golt1b	3.35701	0.00790987	1
Pdha1	-0.0607038	0.439248	0.563759		Naip2	3.18709	0.00790987	1
Rtcb	0.0443611	0.458146	0.58277		Nnmt	3.18709	0.00790987	1
Eif3j1	-0.0575476	0.492877	0.61529		Rab21	3.18709	0.00790987	1
Bclaf1	-0.0446313	0.452091	0.576997		Rcc2	3.18709	0.00790987	1
Dhfr	-0.060166	0.504466	0.625613		Serpinb9	3.18709	0.00790987	1
Rangap1	-0.0459436	0.645095	0.740444		Trmt6	3.77205	0.00790987	1
Basp1	0.0855278	0.370699	0.49297		Adamts1	3.64652	0.00791493	1
Ap2b1	-0.0369212	0.366993	0.489182		Ammecr1	3.35701	0.00791493	1
Cxadr	0.128037	0.462808	0.586737		Antxr1	3.64652	0.00791493	1
Sarnp	-0.0467755	0.406353	0.531098		Gm14064	3.35701	0.00791493	1
Dbi	-0.0581607	0.527685	0.641337		Gm4462	3.35701	0.00791493	1
Atox1	-0.0967827	0.571344	0.681195		Gm7292	3.35701	0.00791493	1
Cd47	0.0521045	0.395698	0.520036		Gm9294	3.35701	0.00791493	1
Gfpt1	0.0495767	0.437141	0.56232		Sdhaf2	3.35701	0.00791493	1
Pabpn1	-0.0465381	0.553977	0.665356		Snx1	3.64652	0.00791493	1
Sptbn1	0.0314029	0.374317	0.497201		Stard10	3.35701	0.00791493	1
Emd	0.0835793	0.509932	0.6281		4921539E11Rik	3.50901	0.00791549	1
Por	-0.0667623	0.612397	0.717822		Aff2	3.50901	0.00791549	1
Nars1	0.0466343	0.378392	0.500865		A330023F24Rik	3.50901	0.00791661	1
Rps4x	0.0468881	0.380221	0.50243		Cox6c2	3.50901	0.00791661	1
Rpl26	0.0629507	0.380455	0.50243		Midn	3.50901	0.00791661	1
Nup93	0.0459794	0.581482	0.689128		Tmem9b	3.50901	0.00791661	1
Tuba4a	-0.0709927	0.417804	0.542955		Calcrl	3.77205	0.0079183	1
Hnrnpa0	-0.0744001	0.425989	0.550458		Cd82	3.77205	0.0079183	1
Arpc2	-0.0370972	0.397979	0.521348		Gm42906	3.64652	0.0079183	1
Map2k1	0.0534048	0.50733	0.62747		Gm47760	3.64652	0.0079183	1
Hsd17b12	-0.0496532	0.473839	0.598065		Map2k3	3.77205	0.0079183	1
Lbr	-0.034175	0.677942	0.765115		Pip4k2a	3.77205	0.0079183	1
Adsl	-0.0588796	0.457854	0.58277		Rpl36-ps12	3.64652	0.0079183	1
Dpp3	-0.0568468	0.477782	0.600385		Rps12-ps19	3.64652	0.0079183	1
Cope	-0.0374187	0.597402	0.702717		Sulf2	3.64652	0.0079183	1
Copa	0.0393084	0.407544	0.532045		Scyl3	-1.04854	0.00792746	1
Map7d1	-0.010657	0.909324	0.934719		Nfic	2.43501	0.00799018	1
Acin1	-0.0316002	0.590343	0.69729		Tsg101	1.46719	0.00802635	1
Eif3f	0.0461428	0.41885	0.543202		Kdelr2	0.964693	0.00807746	1
Timm8b	-0.005794	0.956076	0.972266		Gm8250	2.35701	0.00809604	1
Rtn3	0.041987	0.41686	0.542346		Cpne8	2.5656	0.00820676	1
Cyp20a1	0.020577	0.801636	0.860765		Gm12778	0.604697	0.0082704	1
Rps12	-0.0544862	0.418946	0.543202		Erp29	2.32459	0.00829414	1
Casp3	-0.03689	0.73481	0.808504		Abi1	0.7176	0.00830502	1
Arfip1	-0.0662374	0.744642	0.817745		Zeb2	3.27455	0.00833932	1
Hspg2	-0.0376545	0.498451	0.621565		Ccdc88c	-0.685364	0.0083899	1
Snrpa	0.0354838	0.445801	0.570886		2610307P16Rik	2.27455	0.00840667	1
Naxe	-0.0207404	0.831293	0.88151		Il6st	2.27455	0.00840667	1
Dctn1	0.043793	0.714903	0.793487		Map4	-1.27686	0.00843859	1
Rbbp7	0.0180792	0.86808	0.90956		Phf20l1	1.90955	0.0084434	1
Picalm	0.0428341	0.527796	0.641337		Gm7125	-2.98284	0.00849574	1
Naa15	-0.0142935	0.868905	0.90956		Rbms3	2.09398	0.00851154	1
Arcn1	0.0391326	0.432642	0.55779		Gm15483	0.852667	0.00851274	1
Rps13	0.0481623	0.428387	0.55293		Gm12366	0.623185	0.00853321	1
Yipf5	-0.00687679	0.923512	0.943354		Nmt1	0.692976	0.00854078	1
Anp32e	-0.0636855	0.693084	0.779122		Ehd4	-3.27235	0.00855718	1
Ddx6	0.0414448	0.585825	0.693388		Wdr70	-1.03015	0.00859007	1
Kpna3	-0.0415562	0.614382	0.717964		Nagk	3.18709	0.0085945	1
Trim28	0.0277056	0.437715	0.562424		Fmn1	1.99444	0.00862051	1
Ptms	0.0729476	0.559832	0.670271		Prex2	2.88753	0.00871416	1
Ctnnd1	0.039422	0.443254	0.568261		Scel	2.88753	0.00871416	1
Sf3b4	-0.00800142	0.920926	0.941556		1700128A07Rik	2.99444	0.00871663	1
Pdhb	0.0439747	0.524706	0.64031		Ephx1	2.99444	0.00871663	1
Nup155	-0.0104129	0.905554	0.932525		App	1.28019	0.00880847	1
Rpl19	0.040052	0.447835	0.572848		Timp3	1.43501	0.00882084	1
Dnm1l	0.0468175	0.530332	0.643656		Atg16l2	0.723138	0.00882565	1
Csnk2a1	-0.0640949	0.510297	0.6281		Gm8860	2.77205	0.00883782	1
Sec11a	-0.03191	0.492879	0.61529		Gm10335	0.851901	0.0088699	1
Rras	-0.0314577	0.596212	0.702041		Sars	-1.56964	0.0088998	1
Ppp1r7	-0.108262	0.511011	0.628301		Gm13092	1.88753	0.00894033	1
Hnrnpdl	-0.0376516	0.474966	0.598164		Gm24950	2.64652	0.00895928	1
Akr1a1	0.0392034	0.469937	0.593796		Rps10	2.64652	0.00895928	1
Rpl15	0.0346244	0.460509	0.58474		5031425E22Rik	2.99444	0.0089597	1
Rps27a	0.0410925	0.46072	0.58474		Cdk5rap2	1.50901	0.00897757	1
Scamp3	-0.0258509	0.64461	0.740444		Mfap1b	1.22103	0.00898741	1
Tsn	-0.0258783	0.900729	0.928394		Gmds	1.94197	0.00900053	1
Luc7l2	0.0382456	0.532972	0.644196		C1qbp	1.24367	0.00902395	1
Tcof1	-0.0239214	0.773393	0.84364		Cdc123	0.723138	0.0090287	1
Rab2a	0.044267	0.475503	0.59818		Ptp4a2	0.861315	0.0090326	1
Srprb	-0.0413968	0.646283	0.740444		Arhgap21	0.49663	0.0091466	1
Snx3	-0.0442201	0.593734	0.699846		AL928616.1	1.5656	0.00915604	1
Lxn	0.00761739	0.968177	0.979335		Pea15a	1.95262	0.00919254	1
Eif3l	0.024749	0.480638	0.602646		Septin10	1.95262	0.00919254	1
Eif3b	-0.0351665	0.478369	0.600461		Prr13	1.37151	0.00921577	1
Lsm8	0.0157885	0.806918	0.862881		Gm46142	0.581	0.00922731	1
Rnps1	0.029978	0.710871	0.792093		Ppp2r5a	1.11997	0.00925064	1
Sptan1	-0.0200803	0.482892	0.604808		Pfn1	0.444344	0.0092791	1
Cbx3	-0.0725503	0.49965	0.62238		Gm15066	-1.33898	0.00932266	1
Rab5a	0.00124651	0.99083	0.994316		Mpc1	1.5656	0.00934141	1
Decr1	0.0366537	0.631777	0.731093		Rps24	-0.38642	0.00936442	1
Uba1	-0.0304932	0.486724	0.608939		Fam114a1	2.60212	0.00936541	1
C1qbp	0.0629881	0.531101	0.643656		Pik3r1	2.60212	0.00936541	1
Dync1li1	-0.0368038	0.72162	0.797145		Sdsl	1.86516	0.00942069	1
Copg1	-0.0366415	0.517139	0.634469		Dnajc8	0.526041	0.00950046	1
Serpinb6	0.0328596	0.614768	0.717964		Crppa	2.50901	0.00950658	1
Capza1	-0.0370186	0.575233	0.683688		Galk2	2.50901	0.00950658	1
Ddx21	-0.0394145	0.519078	0.636163		Klf6	2.50901	0.00950658	1
Psma1	0.0379776	0.515942	0.633681		Gm5921	2.50901	0.00951054	1
Map4	-0.0314277	0.502991	0.624744		Myh9	0.549656	0.00953525	1
Slc25a11	0.0372138	0.617745	0.719232		Pfdn2	-1.59719	0.009544	1
Glod4	0.0216978	0.733726	0.808504		Myof	0.797139	0.00956916	1
Mydgf	0.0462991	0.603608	0.709286		Spag9	1.67894	0.0096323	1
Ptbp1	-0.0294435	0.501855	0.624445		Tnks1bp1	2.40948	0.00963759	1
Eprs1	0.0286486	0.50319	0.624744		Wwp1	2.60212	0.00964605	1
Spcs1	0.0110466	0.887406	0.922158		Cnot4	-0.446592	0.00968028	1
Eif3h	-0.0182435	0.790931	0.851194		Mrps17	0.788536	0.00971093	1
Btf3	0.00116614	0.993978	0.995723		Gm4997	0.650486	0.0097771	1
Sar1a	0.0432518	0.527127	0.641337		Zfp36l2	2.30256	0.00978104	1
Ahcy	-0.038674	0.522965	0.638869		A230001M10Rik	0.882231	0.00985706	1
Txn	0.0450797	0.522234	0.638869		Gm12115	1.70166	0.00988883	1
Ncam1	-0.0435956	0.588842	0.696238		Ssr4	0.924051	0.00988944	1
Rpl24	0.033271	0.522731	0.638869		Stt3a	1.60212	0.00991743	1
Mtdh	-0.0361068	0.557065	0.667659		Gm14336	0.656571	0.00991863	1
UBE2I	-0.0289884	0.708885	0.790653		Nectin2	2.18709	0.00991954	1
Srsf7	0.0280355	0.531397	0.643656		Psma5-ps	2.18709	0.00992227	1
Dbn1	0.0333104	0.566511	0.676139		Nenf	0.795895	0.00996891	1
Phpt1	-0.00249433	0.974639	0.983256		Tinagl1	1.18709	0.0100429	1
Gpi	-0.0349093	0.532111	0.643837		Epn2	2.06155	0.0100612	1
Copb2	0.0227639	0.717744	0.795093		Fbl	2.06155	0.0100612	1
Blvrb	-0.0456159	0.543463	0.654104		Prc1	-2.20523	0.0100986	1
Fkbp10	-0.0361882	0.540611	0.652103		Nxn	1.29018	0.0100996	1
Etfa	-0.0277239	0.540657	0.652103		Rpl7-ps7	0.617073	0.0101095	1
Ttll12	-0.0375048	0.563163	0.673552		Pdcd4	0.954912	0.0101245	1
Ncl	-0.031573	0.542092	0.653144		Gm5491	-1.3023	0.0101509	1
Numa1	0.0291698	0.578908	0.687341		Jagn1	1.5656	0.010152	1
Ahcyl1	-0.0289398	0.651294	0.744615		Gm8849	1.18709	0.0102118	1
Alad	-0.0411542	0.648814	0.742525		Skap1	-2.57845	0.0102539	1
Pygb	0.0100067	0.897256	0.928167		Gm11951	1.30256	0.0102608	1
Srsf3	0.0282587	0.55627	0.667407		Tceal8	0.615115	0.0102699	1
Rps9	0.0384299	0.553836	0.665356		Fam120c	-2.13484	0.0102782	1
Nomo1	-0.0251193	0.738119	0.811362		Tax1bp1	0.880982	0.0103041	1
H2ac4	-0.0355999	0.646347	0.740444		Sox4	1.46272	0.0103059	1
Sun2	0.0286694	0.565358	0.67547		Gm30619	0.798043	0.0103654	1
Mpst	-0.00871609	0.900642	0.928394		Txndc5	1.5656	0.0105813	1
Ptrh2	-0.0221161	0.802587	0.860765		Vcp-rs	1.45012	0.0106901	1
Mapk1	-0.0149624	0.843474	0.89029		Cog5	-2.09302	0.0107372	1
Lgmn	0.0213533	0.780658	0.846196		Slc47a2	-2.24587	0.0107524	1
Ak3	0.0390593	0.665963	0.755332		Tns3	1.50901	0.010773	1
Rbm39	0.0198793	0.804856	0.862292		Psme1	-1.79019	0.0108257	1
Npc2	-0.0379607	0.670895	0.759415		Gm40123	-1.8833	0.0108302	1
Plod3	-0.0308898	0.71941	0.796165		Mapre3	-1.2232	0.0108349	1
Selenof	-0.0274438	0.637842	0.736537		Rpn2	1.27455	0.0109784	1
Naca	0.0325621	0.617006	0.719105		Supt4a	1.0427	0.0110304	1
Ddx3x	0.0280478	0.653442	0.746323		Anxa3	0.476592	0.0110728	1
Arf1	0.0338933	0.643047	0.740444		Gm10362	1.10462	0.011185	1
Ndrg1	-0.0211666	0.790516	0.851194		Plekhh2	1.67251	0.0112244	1
Adk	-0.0311945	0.668269	0.757195		Htra1	1.03508	0.0112402	1
Nedd4	0.036252	0.662759	0.753946		Mrpl23	1.11308	0.0112957	1
Tcp1	-0.0215078	0.59298	0.699679		Golgb1	1.77205	0.0113346	1
Cd63	-0.0342394	0.635596	0.734767		Pccb	-3.71981	0.0114126	1
Gstm1	0.0261536	0.644063	0.740444		Snord13	-3.62027	0.0114261	1
Ctsl	-0.0194425	0.783528	0.846596		Fdft1	-3.51335	0.0114351	1
Rps6	0.0378959	0.607097	0.712651		Gm7542	-3.51335	0.0114351	1
Grn	-0.038661	0.619619	0.720679		Dleu2	-3.39788	0.0114395	1
Rcn2	-0.029582	0.626795	0.726801		Gm39556	-3.81291	0.0114415	1
Gspt1	0.0196295	0.711852	0.792413		1700066B19Rik	-4.06084	0.0114421	1
Hyou1	0.0210319	0.612759	0.717822		Gm14094	-3.51335	0.0114434	1
Ppp1r12a	0.0282985	0.661581	0.753357		Defb43	-4.27235	0.0114453	1
Vdac2	-0.0345967	0.61548	0.71806		Igfbp6	-4.20523	0.0114472	1
Tmem109	-0.000402011	0.995785	0.996011		Psap	1.08325	0.0114899	1
Rpl38	0.0289608	0.621171	0.721747		Tnr	1.18709	0.0115294	1
Gstp1	0.0274517	0.626146	0.726789		Wapl	-2.08593	0.0115946	1
Ybx1	0.0315873	0.628802	0.728389		Tlk2	-1.87704	0.0116292	1
Twf1	0.0242242	0.677088	0.764908		Dgkb	0.24186	0.0116386	1
Eif2s1	0.0259452	0.644724	0.740444		mt-Tq	0.465209	0.0116421	1
Kpnb1	-0.0244627	0.638418	0.736537		Atg4b	-1.99224	0.0116546	1
Eif2s3x	0.00852448	0.875197	0.915306		Tmem256	-0.573976	0.0116621	1
Rab10	-0.0322605	0.654911	0.747254		Rps11	-0.411227	0.0117141	1
Tnks1bp1	-0.0118053	0.850935	0.89568		Rnaseh2c	-1.60433	0.0118203	1
Psma3	0.0316686	0.686113	0.772808		3000002C10Rik	-1.98284	0.0118239	1
Rpl18a	0.0205026	0.665173	0.755332		Gm11826	0.752683	0.0119227	1
Rpl37	-0.0316892	0.660981	0.753357		9030622O22Rik	2.02359	0.0119239	1
Sdha	-0.0250882	0.734682	0.808504		Ppp1r14b	1.38872	0.0119883	1
Fkbp2	0.0242556	0.788543	0.851194		Potegl	1.7176	0.012015	1
Cs	-0.0213741	0.665668	0.755332		Pitpna	-0.497559	0.0120369	1
Grpel1	-0.0273089	0.699906	0.783702		Sp100	-1.90807	0.0122409	1
Napa	0.0258151	0.713112	0.793041		Tmsb10	-0.33223	0.012259	1
Rps3	-0.0198029	0.674687	0.762951		Bri3	-2.51335	0.0122611	1
Sucla2	0.0123848	0.85456	0.898667		Mydgf	1.47659	0.0122617	1
Copb1	-0.0230937	0.70086	0.784001		Rabgef1	-0.401947	0.0123558	1
Dlat	-0.00185263	0.983108	0.990049		Rsu1	1.72314	0.0123851	1
Wdr1	-0.0215273	0.680958	0.76776		Gm19366	1.92405	0.0124776	1
Pcna	0.0205446	0.707135	0.789472		Arl4c	2.23771	0.0124884	1
Rab7a	-0.019937	0.693954	0.779332		Tcp1	0.95262	0.0124991	1
Mtpn	-0.0185605	0.835671	0.885098		Gabra3	-0.617279	0.0125016	1
Rbm3	-0.0346916	0.69288	0.779122		Myo1d	-3.13484	0.0125853	1
G6pdx	0.0197217	0.721692	0.797145		Sh3bgrl	1	0.0126325	1
Eif3k	-0.00316583	0.95693	0.972268		Grm3	1.23771	0.012791	1
Rps25	-0.0207498	0.698542	0.783702		Usp50	0.661017	0.0128014	1
Dnaja1	-0.0136506	0.823157	0.873695		Creb3l2	2.30256	0.0131312	1
Rpl34	-0.0145329	0.699594	0.783702		Fkbp1a	0.506154	0.0131836	1
Atp5f1c	0.0224603	0.705089	0.78796		Gm6612	0.705959	0.0132272	1
Psmd13	-0.0147161	0.760463	0.833514		Neat1	1.23059	0.0132378	1
Eif5a	-0.0324722	0.714863	0.793487		Gucy1b2	0.668618	0.0132814	1
Txndc12	0.014616	0.842027	0.889586		Rps8-ps2	1.5794	0.0133634	1
Rpl23	0.0189842	0.717143	0.795093		Kit	1.08755	0.0134873	1
Lman1	-0.0217392	0.782603	0.846399		Hhla1	0.971357	0.0135415	1
Srm	-0.0107789	0.888688	0.922651		Gm23935	1.14861	0.0136196	1
Prdx5	0.0170459	0.769811	0.841516		Gm36594	0.750986	0.0136322	1
Eif4h	0.0193641	0.78141	0.846196		Gm6477	0.911451	0.0136667	1
Hnrnpul2	-0.0190581	0.733233	0.808504		Hspe1	0.74968	0.013746	1
Tra2b	0.0120159	0.809333	0.863844		Mto1	1.00564	0.0137881	1
Rps24	-0.0194705	0.752774	0.82588		Clybl	-2.05392	0.0138146	1
Vars1	-0.0121114	0.821561	0.873627		Rpl7a-ps10	2.02359	0.0139451	1
Lars1	0.00306719	0.974451	0.983256		Fam162a	0.733054	0.0140851	1
Dynll1	0.00163255	0.97438	0.983256		Slc25a51	-1.91245	0.0141239	1
Raly	-0.0138279	0.774877	0.84364		Hspa4	0.871584	0.0141582	1
Dbnl	0.00770827	0.886528	0.922086		Atxn7l3b	1.13818	0.0142264	1
Prep	0.0160136	0.774234	0.84364		Gm7561	0.759975	0.014338	1
Xpnpep1	0.0170394	0.806102	0.862816		Gm12094	0.739627	0.0143425	1
Sub1	-0.00899715	0.867504	0.90956		Rpsa-ps9	0.509014	0.0144086	1
Sf3b2	-0.0138261	0.779177	0.846196		Gm7730	0.815117	0.0145134	1
Capn2	0.0143962	0.817023	0.869611		Gm6988	0.579403	0.0145193	1
Pacsin2	-0.0167599	0.778284	0.846196		Atox1	0.524121	0.0145323	1
Tmed2	-0.0182399	0.768977	0.841516		Gm6822	0.48927	0.0146315	1
Rps28	-0.0177193	0.780408	0.846196		Gm42725	-3.81291	0.0146582	1
Cct6a	0.0120076	0.769976	0.841516		Csmd3	0.725952	0.0147416	1
Eif2s2	-0.0146592	0.802676	0.860765		Agfg2	-2.98284	0.0148322	1
Calm1	-0.0311778	0.774269	0.84364		Ifitm2	0.529611	0.0148645	1
Sf3b3	-0.00510003	0.929755	0.948882		Ccdc186	2.5794	0.0148827	1
Tuba1a	-0.0131942	0.781674	0.846196		Cavin3	0.794768	0.0149261	1
Psma5	-0.00622645	0.911175	0.935315		Txn2	1.15392	0.0149435	1
Psat1	0.0147764	0.814973	0.86824		Mical2	1.48965	0.0149588	1
Tagln2	0.0160818	0.790881	0.851194		Hs6st2	1.37973	0.0149846	1
Rps15a	0.0122684	0.791513	0.851194		Knl1	-2.73891	0.0150757	1
Pebp1	-0.0125116	0.846228	0.891548		Olfr1513	-1.55614	0.01509	1
Cap1	-0.0115514	0.808666	0.863844		Rai14	1.50901	0.0151041	1
Sod1	0.0150406	0.810968	0.86478		Gm20305	1.43501	0.0151197	1
Clic1	0.0105135	0.822971	0.873695		Gm4754	0.924051	0.0152162	1
Dstn	0.00416958	0.950583	0.967543		Rpl35a-ps2	0.550898	0.015224	1
Cnpy2	0.00771935	0.906855	0.933022		Gm6368	1.99444	0.0152382	1
Hnrnpk	-0.0110225	0.836645	0.885098		Tuba1a	-0.449381	0.0152476	1
Eif4a1	-0.0151583	0.837003	0.885098		Itga8	-1.84266	0.0153093	1
Eif3c	-0.00671079	0.881798	0.918004		Bsn	-3.43741	0.0153538	1
Rps20	0.0102394	0.845891	0.891548		Arhgdia	1.09398	0.0153791	1
Ap2a2	0.00476939	0.917714	0.94067		Gm10243	0.924051	0.01544	1
Erh	-0.00731668	0.900006	0.928394		Glrx3	0.911451	0.0154444	1
Pgm1	0.00872474	0.876354	0.915633		C1ra	2.08017	0.0155476	1
Rps3a	-0.00869226	0.861302	0.904922		Atp5g3	-0.75688	0.0155494	1
Rpl30	-0.00717901	0.86883	0.90956		Tsta3	1.35701	0.015628	1
Psmc5	0.00629307	0.893357	0.9263		Gm11878	2.09398	0.015628	1
Rpl29	0.0103128	0.893827	0.9263		Rpl37-ps1	0.860275	0.0156415	1
Cdc42	-0.00718013	0.898606	0.928394		Arhgap28	3.64652	0.0157499	1
Ap2m1	-0.00617992	0.877114	0.915633		Gm14052	2.77205	0.0157499	1
Atp5f1b	0.00576755	0.878658	0.916406		Kifc2	2.77205	0.0157499	1
Gnai2	-0.00111548	0.988139	0.992488		Mapkapk2	3.64652	0.0157499	1
Hspa4	0.0056203	0.881656	0.918004		Ubtd1	2.77205	0.0157499	1
Glo1	-0.0047273	0.932201	0.950529		2810004N23Rik	2.99444	0.0157611	1
Clta	0.00573542	0.89524	0.926923		4930532G15Rik	2.99444	0.0157611	1
Prdx3	-0.00725193	0.911543	0.935315		Actr3b	3.50901	0.0157611	1
Mdh1	0.000274033	0.996011	0.996011		Eif2s3x	2.99444	0.0157611	1
Actr2	-0.00102133	0.985681	0.990892		Exoc3	3.50901	0.0157611	1
Hsp90ab1	0.00672243	0.918411	0.94067		Flot1	2.99444	0.0157611	1
Rpl21	-0.00437903	0.919478	0.940919		Fpgs	2.99444	0.0157611	1
Ppp1ca	0.00210124	0.965376	0.978237		Fzd2	3.50901	0.0157611	1
Rpl35a	-0.0034068	0.936802	0.954367		Gm2115	2.99444	0.0157611	1
Pabpc1	-0.00195086	0.958095	0.972586		Gm9973	2.99444	0.0157611	1
Rps2	-0.00196273	0.96323	0.97693		Mir684-1	2.99444	0.0157611	1
Cyc1	-0.00238421	0.967525	0.979335		Pank3	2.99444	0.0157611	1
Iqgap1	-0.000932644	0.976929	0.984696		Prpf8	2.99444	0.0157611	1
Hnrnpc	-0.00092865	0.984068	0.990143		Smim15	2.99444	0.0157611	1
Eif3a	0.000479288	0.992915	0.995533		Tspan17	2.99444	0.0157611	1
					Wdr17	3.77205	0.0157611	1
					5033406O09Rik	3.18709	0.0157667	1
					Akr1e1	3.35701	0.0157667	1
					E2f3	3.18709	0.0157667	1
					Eml2	3.18709	0.0157667	1
					Frmd8	3.35701	0.0157667	1
					Gal3st2c	3.18709	0.0157667	1
					Gatd1	3.18709	0.0157667	1
					Gm10284	3.35701	0.0157667	1
					Gm12724	3.35701	0.0157667	1
					Gtf2a1	3.18709	0.0157667	1
					Hk1	3.18709	0.0157667	1
					Jade2	3.18709	0.0157667	1
					Kifbp	3.18709	0.0157667	1
					Palm	3.18709	0.0157667	1
					Pdzd8	3.18709	0.0157667	1
					Purb	3.18709	0.0157667	1
					Rpl27a-ps2	3.18709	0.0157667	1
					Rplp1-ps1	3.18709	0.0157667	1
					Rsrp1	3.35701	0.0157667	1
					Slc25a28	3.35701	0.0157667	1
					Slc28a2	3.35701	0.0157667	1
					Spaca6	3.35701	0.0157667	1
					Trim2	3.18709	0.0157667	1
					Vamp2	3.35701	0.0157667	1
					Zc2hc1a	3.18709	0.0157667	1
					Fmod	3.64652	0.0157678	1
					Gm12185	3.35701	0.0157678	1
					AC159819.1	-1.64942	0.01577	1
					9930111J21Rik2	3.50901	0.0157701	1
					Abhd12	3.64652	0.0157701	1
					Muc13	-2.19758	0.0158445	1
					C920021L13Rik	-2.81291	0.0158943	1
					Pnkd	0.739627	0.0159938	1
					Tceal9	-0.828856	0.0160366	1
					Nsd1	-0.599084	0.016066	1
					Gm5786	0.723685	0.0161248	1
					Fam221b	0.316764	0.0161583	1
					4930519F16Rik	-0.7458	0.0162317	1
					Pdzrn3	1.85005	0.0162322	1
					Myo15	-2.47588	0.0162418	1
					Id3	0.910568	0.0162885	1
					Gm13588	-0.416589	0.0165226	1
					Derl1	1.12569	0.0165517	1
					Cbfb	-1.42172	0.0166454	1
					Rpl3-ps2	1.35701	0.0166515	1
					Armh3	-1.1057	0.0167777	1
					Arl1	0.710648	0.0167994	1
					Cep57	-2.20523	0.0167995	1
					Gm6335	1.77205	0.0168103	1
					Wasl	1.77205	0.0168103	1
					Gm32633	-2.62027	0.0168268	1
					Romo1	0.41041	0.0168443	1
					Cyren	2.99444	0.0168494	1
					Tsc22d1	1.28019	0.0168848	1
					Eml6	-1.0517	0.0169922	1
					Rps8-ps4	1.5656	0.0170337	1
					Upk3b	1.95262	0.0170422	1
					Rpl23a	0.652749	0.0170424	1
					Nubpl	1.71065	0.0170704	1
					Got1	3.09398	0.0170931	1
					BC005624	2.64652	0.0173276	1
					Dcxr	2.77205	0.0173353	1
					Ccnd1	1.77205	0.0174526	1
					Dhx15	1.77205	0.0174526	1
					Gm49445	1.85005	0.0174785	1
					Rpl10a-ps1	0.480282	0.0174805	1
					St7l	1.45012	0.0175321	1
					Cox20	2.77205	0.0175657	1
					Hmgb1-ps9	2.50901	0.0175657	1
					Nr3c1	2.50901	0.0175657	1
					Srsf6	2.50901	0.0175657	1
					Uqcrh-ps1	2.50901	0.0175657	1
					Cdc25c	-2.54988	0.0175792	1
					Gm45855	0.741674	0.0176002	1
					Rbbp8	1.87514	0.0176234	1
					Gatad1	1.23148	0.0176609	1
					Gm48228	0.653867	0.0176889	1
					Pbdc1	2.35701	0.0178005	1
					Med6	1.67251	0.0178905	1
					Ppp4c	1.67251	0.0178905	1
					BC031181	1.77205	0.0178963	1
					Gm10029	0.464381	0.0179775	1
					Ezh2	-1.14852	0.0180326	1
					Khsrp	1.50901	0.0180594	1
					Rps7	-0.412598	0.0180629	1
					Polr2e	1.43501	0.0181467	1
					Tns1	-1.91725	0.0181897	1
					Akr1b8	1.5656	0.0183284	1
					Gfpt1	1.37973	0.0183456	1
					Hectd1	-1.8833	0.0184061	1
					Tnfrsf12a	2.45012	0.0184091	1
					Gm6170	1.294	0.0184856	1
					Rpl13a	1.28662	0.0185703	1
					Sema5a	2.30256	0.0186041	1
					Slc38a10	2.40948	0.0186041	1
					Decr2	2.30256	0.0186057	1
					Aamp	0.444243	0.0186343	1
					Sgsm3	-1.38366	0.0186372	1
					Ssu72	-1.172	0.0186575	1
					Tmod3	1.33909	0.0187171	1
					Ccs	1.40948	0.0187908	1
					Fstl1	0.678939	0.0188007	1
					Arhgap26	1.60212	0.0188122	1
					Gm3699	-0.350879	0.018821	1
					Vapb	2.43501	0.0188246	1
					Cpeb1	2.18709	0.0188592	1
					Gnl3	2.18709	0.0188674	1
					Lpp	0.49903	0.0188781	1
					Slc37a3	0.975581	0.0188918	1
					Gm9803	-1.42762	0.0189318	1
					Gm7600	1.30256	0.0190166	1
					Gm6883	0.587623	0.0191263	1
					Nudt2	2.06155	0.0191282	1
					Fas	2.06155	0.019129	1
					Ltbp2	2.06155	0.019129	1
					1190028D05Rik	0.234813	0.0191675	1
					Gm13815	1.32459	0.0192214	1
					Gm7846	1.32459	0.0192214	1
					R3hdm2	-1.02348	0.0192255	1
					Gm7380	0.460104	0.0192303	1
					Rad23b	1.18709	0.0193188	1
					Samd9l	0.631567	0.019324	1
					D330023K18Rik	1.92405	0.0193955	1
					Scap	1.92405	0.0193955	1
					Galnt2l	-0.345348	0.0194024	1
					Gm37258	-1.66852	0.0195986	1
					Gm15599	-1.00931	0.0195999	1
					Ube2f	1.77205	0.0196585	1
					Gm10736	-0.294873	0.0196659	1
					Farp2	-3.62027	0.0196928	1
					Aftph	-3.27235	0.0197028	1
					Pml	-3.27235	0.0197028	1
					Rcor1	-3.27235	0.0197028	1
					Trappc6b	-3.27235	0.0197028	1
					Zfp781	-3.71981	0.0197028	1
					Ifi30	-3.51335	0.0197039	1
					Cdca2	-3.13484	0.0197061	1
					Rab3ip	-3.13484	0.0197061	1
					H2-Q7	-3.62027	0.0197094	1
					Pcmtd1	-3.62027	0.0197094	1
					Spata13	-3.62027	0.0197094	1
					Zscan30	-3.39788	0.0197094	1
					C77080	-5.13484	0.0197105	1
					Ifit2	-3.71981	0.0197105	1
					Myom2	-4.20523	0.0197105	1
					Iigp1	-3.62027	0.0197127	1
					AU040320	-4.20523	0.0197138	1
					Snx8	-1.70044	0.0197189	1
					Myl12b	1.40948	0.0198756	1
					Tle5	0.755369	0.01994	1
					Creb3	1.50901	0.0199475	1
					D130009I18Rik	0.372441	0.0199782	1
					Espn	-1.28865	0.0199857	1
					Ppp2r3a	1.53501	0.0201576	1
					Yme1l1	0.856937	0.0202309	1
					a	0.905904	0.0203092	1
					Ifi202b	1.18709	0.0203552	1
					C330019F10Rik	-2.09302	0.0203563	1
					Egfr	2.32459	0.0203671	1
					Prkrip1	-1.01937	0.0204622	1
					Pphln1	-1.29531	0.0205228	1
					Gm20819	1.36766	0.0205246	1
					Dctd	-2.85731	0.0207034	1
					9530068E07Rik	1.23439	0.0207222	1
					Abca13	2.11308	0.0208108	1
					Eif4g2	1.09398	0.0208284	1
					Txndc9	0.73252	0.020945	1
					Zbed5	-0.741576	0.0209662	1
					Wdpcp	0.363963	0.0211106	1
					Gm50019	-2.04995	0.0211557	1
					Klf3	1.42809	0.0211616	1
					Immp1l	1.25122	0.0211724	1
					Il18	2.03508	0.0212783	1
					Gm8724	0.627658	0.0213068	1
					Srrm2	0.756781	0.021431	1
					Gm15795	-0.368486	0.0214669	1
					Mxra8	1.95262	0.0215094	1
					Rnf122	-1.95976	0.0215192	1
					Snap23	-1.13484	0.0215594	1
					Psmd2	1.63454	0.0217452	1
					Arrdc4	1.92405	0.0217531	1
					S100a6	-0.419176	0.021901	1
					Sec63	1.53501	0.0219145	1
					Cask	1.90329	0.0219981	1
					Trp53	1.42809	0.0221769	1
					Dynlt1-ps1	0.69488	0.0222514	1
					2410006H16Rik	-0.585737	0.0224591	1
					Trim30a	0.17227	0.0225398	1
					Rps4x-ps	0.351782	0.0227245	1
					Vezf1	1.96469	0.0227479	1
					Col8a1	2.02359	0.022752	1
					Gm11975	0.543229	0.0228193	1
					Gm10126	1.11308	0.0229011	1
					Polr2b	1.77205	0.0229755	1
					Itgb1	0.637747	0.0231085	1
					Gm14813	1.67251	0.0231955	1
					Msrb3	1.03508	0.0232925	1
					Lrp1	0.851901	0.0233224	1
					Lsm5	0.772048	0.0233269	1
					Nrp1	0.597718	0.023627	1
					Zbtb1	-1.08039	0.0236793	1
					Crk	-1.18637	0.0237501	1
					Gm44341	1.77205	0.0237736	1
					Tsn	0.99444	0.0238513	1
					Rpl32l	-0.439791	0.0238542	1
					C330007P06Rik	0.99444	0.0238722	1
					Prkar1a	0.875142	0.0239132	1
					Lrba	-0.311732	0.0239891	1
					Emd	-1.0036	0.0241056	1
					Pold1	-1.71981	0.0241643	1
					Filip1l	1.62766	0.0242814	1
					Epha5	-2.07595	0.0244237	1
					Gm5620	-1.19143	0.0244247	1
					Gm4833	0.471539	0.0244273	1
					Serbp1	0.376985	0.0244346	1
					Adarb2	-2.68738	0.0244823	1
					Abhd2	1.54966	0.0245445	1
					Gm12216	-1.95587	0.0246928	1
					Rangap1	-1.13484	0.0247042	1
					Swi5	0.695697	0.0248358	1
					R3hdm1	1.26955	0.0248919	1
					Flna	1.99444	0.024951	1
					Acta2	0.403326	0.0250383	1
					Oasl2	-2.68738	0.0250571	1
					Isg20l2	1.46719	0.0250724	1
					Gm6035	1.46719	0.0250775	1
					Ctnnal1	0.906978	0.0251926	1
					Gm2619	-2.90038	0.0252788	1
					Slpi	-0.0539225	0.0253034	1
					Commd10	-1.50479	0.0254165	1
					Fancd2	-2.47588	0.02561	1
					Mbtps2	-3.03531	0.0256316	1
					Ccdc92b	-3.20523	0.0256399	1
					Acin1	-1.47588	0.0257297	1
					Mvp	1.28662	0.0261382	1
					Myef2	-2.13484	0.0262275	1
					Tkt	-2.51335	0.0262708	1
					Ehbp1	1.40948	0.0264763	1
					Gm14279	0.468106	0.0266236	1
					Uqcc2	-0.535736	0.0266773	1
					Akap8	1.90329	0.0267722	1
					Soga1	-2.85731	0.0268003	1
					Atp5e	0.313303	0.0270138	1
					Nop56	1.33909	0.02705	1
					Actb-ps1	1.77205	0.0272742	1
					Tcea1	1.85005	0.0272742	1
					Serpinh1	0.312616	0.0273533	1
					Smyd3	-1.44518	0.0275119	1
					Gm20560	-2.09832	0.0276082	1
					Tmbim6	-0.443528	0.0276428	1
					Gm2000	0.300459	0.0277593	1
					Mcc	1.26509	0.0279307	1
					4930554G24Rik	-1.92839	0.028012	1
					Mphosph9	-2.34897	0.0280139	1
					Cyth1	-2.29834	0.0280163	1
					Hapln1	0.51466	0.0280454	1
					Tmem258	0.451359	0.0280465	1
					Fam98b	2.27455	0.0280844	1
					Gm9611	-0.674395	0.0281267	1
					4930481A15Rik	0.602123	0.0282438	1
					Ubn2	1.33393	0.0282549	1
					Pdcd5-ps	-1.68738	0.0282873	1
					Gm12091	0.510827	0.0284017	1
					Smim14	-1.38277	0.0285368	1
					Gm7285	0.661017	0.0285934	1
					Zbtb45	-2.21501	0.0286477	1
					Rad50	-1.30768	0.0287272	1
					Ndufa12-ps	-0.367631	0.0287483	1
					Yif1a	0.839162	0.0289793	1
					Dda1	1.03508	0.0290063	1
					Nrxn1	1.92405	0.0290393	1
					Rpl7-ps9	0.7176	0.0290516	1
					Slc29a1	1.99444	0.0291066	1
					Dynlt3	0.924051	0.0291222	1
					Chd3	2.09398	0.0291245	1
					Zfpl1	0.865157	0.0291251	1
					B4galnt3	-2.49099	0.029136	1
					Cebpb	1.54966	0.0295402	1
					Lalba	1.00651	0.0297569	1
					Fundc2	1.50901	0.0297965	1
					Srp14	0.544638	0.0300372	1
					Gm7809	1.01716	0.0300709	1
					Oaz1	-0.522135	0.0300893	1
					Vtcn1	2.11308	0.0301873	1
					Ddb2	2.40948	0.0302029	1
					Mrps33	0.424125	0.030324	1
					Gm14036	0.887525	0.0303619	1
					Rnaset2a	-1.95587	0.0305159	1
					Rab1b	1.77205	0.0305267	1
					Rnf126	1.77205	0.0305267	1
					Pop5	1.86516	0.0305452	1
					Ddx5	0.610585	0.0306184	1
					1110038F14Rik	1.43501	0.0307636	1
					Dock9	0.653653	0.0308662	1
					Gm5075	0.500585	0.030907	1
					Snx10	1.50901	0.0309095	1
					Col4a6	-1.2577	0.0310354	1
					Mapre1	0.943814	0.0310884	1
					Cuedc1	1.64652	0.0312447	1
					Ddah1	0.45012	0.0313147	1
					Ptgis	0.443425	0.0313498	1
					Grk4	-2.44518	0.03139	1
					Rbis	0.650058	0.0315873	1
					Rpl3-ps1	0.333755	0.0316673	1
					Smndc1	1.50901	0.0319676	1
					Plpp3	1.35701	0.0319741	1
					Rpl10-ps1	1.35701	0.0319741	1
					Rpa3	1.32459	0.0319944	1
					4930471M09Rik	0.593078	0.0322419	1
					Kras	1.27455	0.0322951	1
					Kcnk2	-1.53538	0.0323157	1
					Eif4a1	0.61772	0.0324367	1
					Ankrd13c	-1.57845	0.03244	1
					Hmgcs1	-1.62027	0.0326328	1
					2810471M01Rik	1.42809	0.032641	1
					Ddx3x	1.46719	0.0327575	1
					Yipf3	1.5656	0.0327682	1
					C430049B03Rik	2.77205	0.0328762	1
					Polr3k	2.77205	0.0328762	1
					Card19	-1.92839	0.0329536	1
					Ccn1	1.11308	0.0329615	1
					Derl2	1.07161	0.0330472	1
					Rpl34-ps1	-0.390735	0.0330683	1
					Fibcd1	1.40948	0.0331748	1
					Exoc4	0.99444	0.0332264	1
					Mpc2	0.282243	0.0333489	1
					Ppp2r2c	1.16798	0.0334405	1
					Polr2a	1.45012	0.0334441	1
					Chrac1	1.67251	0.033546	1
					Babam1	1.45012	0.033552	1
					Tatdn1	1.45012	0.033552	1
					Ctnnd1	1.28662	0.0335668	1
					Tmem179b	1.32459	0.0336114	1
					Rpl34	-0.288866	0.0336942	1
					Cdk2ap2	0.772048	0.0337111	1
					2610001J05Rik	2.50901	0.0338096	1
					Clptm1l	2.50901	0.0338096	1
					Fam3b	2.50901	0.0338096	1
					Ptprm	2.50901	0.0338096	1
					Apobec3	2.64652	0.0338137	1
					Cebpz	2.77205	0.0338137	1
					Commd4	1.28662	0.0338383	1
					Ugp2	1.40948	0.0339208	1
					Mkln1	1.30256	0.0339608	1
					Cdkl5	-3.27235	0.0339901	1
					Plekhg3	-3.27235	0.0339901	1
					Tubgcp5	-3.27235	0.0339901	1
					Acvr1	-3.51335	0.0340093	1
					Gm24447	-3.13484	0.0340093	1
					Grhl2	-3.13484	0.0340093	1
					Osbpl7	-3.13484	0.0340093	1
					Rnaseh1	-3.51335	0.0340093	1
					Sec22a	-3.13484	0.0340093	1
					Wdr88	-3.13484	0.0340093	1
					Clec18a	-2.98284	0.0340189	1
					H2-T23	-2.98284	0.0340189	1
					Id2	-2.98284	0.0340189	1
					Kpna3	-2.81291	0.0340189	1
					Mmab	-2.98284	0.0340189	1
					Mrps30	-2.98284	0.0340189	1
					Nampt	-2.98284	0.0340189	1
					Oas2	-2.98284	0.0340189	1
					Osbpl6	-2.98284	0.0340189	1
					Pdcd2l	-2.81291	0.0340189	1
					Pnp	-2.81291	0.0340189	1
					Ppp2r3c	-2.98284	0.0340189	1
					Shmt1	-2.81291	0.0340189	1
					Snx29	-2.98284	0.0340189	1
					Zfp346	-2.98284	0.0340189	1
					Znfx1	-2.81291	0.0340189	1
					Samd15	-3.81291	0.0340208	1
					Nrg4	-3.62027	0.0340246	1
					Polr3b	-3.13484	0.0340246	1
					Kif15	-3.51335	0.0340266	1
					Myh11	-4.39788	0.0340285	1
					Vsig10	-4.5678	0.0340285	1
					Macf1	-0.60141	0.0341765	1
					Cpt1a	2.35701	0.03427	1
					Parp8	2.35701	0.03427	1
					Pde4a	2.35701	0.03427	1
					Ptpmt1	2.35701	0.03427	1
					Scp2-ps2	2.35701	0.03427	1
					Gstt1	2.50901	0.0342714	1
					Rps19-ps1	2.50901	0.0342714	1
					Mdh2	0.59517	0.0342796	1
					Rps27	0.365889	0.034288	1
					Polr2j	1.03508	0.0342988	1
					Gm11185	1.32459	0.0343397	1
					Gm6316	1.32459	0.0343397	1
					Prss36	1.32459	0.0343397	1
					Oat	1.18709	0.0343477	1
					Camk1	0.772048	0.0343646	1
					Anln	-1.31541	0.0345177	1
					Nme1	0.515708	0.0345628	1
					Acot8	2.18709	0.034726	1
					Actr3-ps	2.18709	0.034726	1
					Fsip1	1.22661	0.0347426	1
					Ssbp3	1.18709	0.0347431	1
					Mbd2	1.18709	0.0347576	1
					Col6a2	2.50901	0.0347612	1
					Pole	-2.6709	0.0348599	1
					Nt5c	1.18709	0.0349124	1
					Ap1b1	-1.66607	0.0351057	1
					Tln2	0.78799	0.0351475	1
					Dnajc10	1.02359	0.0353295	1
					Abca1	1.5794	0.0353567	1
					Sugct	2.43501	0.0355462	1
					Abl1	-0.835998	0.0356144	1
					Bcl2l1	2.18709	0.0356939	1
					Gm7117	1.40948	0.0357077	1
					C1s1	2.18709	0.0357356	1
					Ctsb	-1.42172	0.0358972	1
					Gm8982	-2.62027	0.0359057	1
					Trp53bp1	1.10462	0.0359496	1
					Wdr74	0.772048	0.0359923	1
					Rpl35a-ps6	0.360323	0.0360341	1
					Crebbp	1.31262	0.0360724	1
					Lrrcc1	2.06155	0.0362068	1
					Spry2	2.06155	0.0362068	1
					Parl	2.06155	0.0362257	1
					Trim35	2.06155	0.0362257	1
					Vmn2r60	0.447737	0.0362941	1
					Rpsa-ps7	0.417205	0.0363489	1
					Tpt1	-0.432093	0.0364544	1
					Mef2a	1.99444	0.0366688	1
					Grpel1	0.875142	0.0366753	1
					Frem2	1.92405	0.0367156	1
					Gm7799	1.92405	0.0367156	1
					Rhoq	1.92405	0.0367156	1
					Tspyl1	1.92405	0.0367156	1
					Cxcr5	-0.812914	0.0367182	1
					Ikbkb	1.92405	0.03672	1
					Narf	1.92405	0.03672	1
					Sulf1	1.58563	0.0367421	1
					Immt	0.865157	0.0369366	1
					Tmub2	-0.222358	0.0369775	1
					Ppia	-0.340364	0.0370584	1
					Gm8318	0.99444	0.0372062	1
					Prorsd1	1.77205	0.0372112	1
					Bmp4	1.77205	0.03722	1
					Gm5963	1.77205	0.03722	1
					Kif2a	1.77205	0.03722	1
					Mustn1	1.77205	0.03722	1
					Ppp1r18	1.77205	0.03722	1
					Prpsap1	1.77205	0.03722	1
					Psmd3	1.77205	0.03722	1
					Sesn2	1.77205	0.03722	1
					Pmepa1	1.99444	0.0372259	1
					Tbcb	-1.75151	0.03744	1
					Dguok	1.60212	0.0377199	1
					Gm8121	1.60212	0.0377199	1
					Gm9081	1.60212	0.0377199	1
					Pwwp2a	1.60212	0.0377199	1
					Pyurf	1.60212	0.0377199	1
					Rpl31-ps1	1.60212	0.0377199	1
					Uba5	1.60212	0.0377199	1
					Fbxw22	0.882231	0.0377685	1
					Gm7027	0.459706	0.0380445	1
					4930453N24Rik	1.40948	0.0382151	1
					Gm10257	1.18709	0.0382376	1
					Map7d1	1.50901	0.0382557	1
					Pnpla7	1.32459	0.0383362	1
					Col4a1	1.48665	0.0383752	1
					Ociad1	0.694046	0.0385449	1
					Raly	0.835613	0.0385793	1
					Dlg2	0.918269	0.0386709	1
					Mrpl12	1.38872	0.0387569	1
					Pigu	-1.5678	0.0387851	1
					Snrpd3	0.788536	0.0387902	1
					Gm14150	-0.866354	0.0387946	1
					Rps12-ps5	0.903293	0.0392363	1
					Gm12447	0.509014	0.0394789	1
					Tbl1x	1.34463	0.0394932	1
					Golim4	1.85005	0.039536	1
					Rpl35a-ps7	0.438147	0.0398004	1
					Pdgfrl	-1.81291	0.0400721	1
					Mrps18c	-1.04072	0.0400738	1
					Ptms	-0.482163	0.0400749	1
					Ccdc146	0.811576	0.0403102	1
					Gm7482	-0.36794	0.0403521	1
					Ubxn7	-2.13484	0.0404057	1
					Ptprk	1.09632	0.0404452	1
					Ptbp3	0.535009	0.0405359	1
					Siva1	-1.73891	0.0405552	1
					Gm14494	-1.8833	0.0407716	1
					Ncbp2	1.68959	0.0407748	1
					Adamts6	0.53286	0.041052	1
					Gm13461	0.656571	0.0411177	1
					Lclat1	-1.15172	0.0412445	1
					Specc1	0.797139	0.0412675	1
					Pcbp1	1.18709	0.0412785	1
					Ubr5	1.36542	0.0413458	1
					Isg20	-2.87181	0.0415037	1
					Dlg4	-3.35723	0.0415296	1
					Plekha4	-3.81291	0.0415359	1
					Gm6789	1.60212	0.0416087	1
					Rab5a	1.60212	0.0416087	1
					Vbp1	-1.92839	0.0416276	1
					Chchd4	1.18709	0.0416369	1
					Serf2	0.27746	0.041861	1
					Sat1	0.824515	0.0418842	1
					Mrpl20	0.470879	0.0418845	1
					Actn4	0.906978	0.0419541	1
					Kdm4c	-1.29096	0.0420625	1
					Glis3	-2.47588	0.0424216	1
					Rpl10-ps3	0.470667	0.0424661	1
					Bri3bp	1.60212	0.0425312	1
					Nup35	-1.81291	0.0428258	1
					Mrpl36	0.583014	0.042905	1
					Orc6	-2.81291	0.0429506	1
					Timm22	1.54966	0.0429811	1
					C730034F03Rik	-3.62027	0.0429977	1
					1110004F10Rik	0.362935	0.0430774	1
					Acadl	-2.31541	0.0433384	1
					Ccdc124	1.60212	0.0434143	1
					Matr3	-2.62027	0.04349	1
					Ngdn	-2.90038	0.0435289	1
					Zfp958	-2.98284	0.0435332	1
					Mrps16	-1.55834	0.0436583	1
					Snhg8	0.357011	0.0437464	1
					Eif2b3	-1.04558	0.0440229	1
					Arsb	-2.51335	0.0440539	1
					Terf1	-2.51335	0.0440539	1
					Esd	-1.11872	0.0440676	1
					Zdhhc18	-3.13484	0.0440685	1
					Fam222b	-2.71981	0.0440757	1
					Rpsa	0.331187	0.0441454	1
					Pin4	1.06155	0.0441687	1
					Ptpn11	0.630692	0.0441825	1
					Trim28	1.58301	0.044206	1
					C530008M17Rik	0.813271	0.0442489	1
					Serinc3	1.27455	0.0443359	1
					Gm12183	0.797139	0.0443398	1
					Gm6682	-0.672052	0.0443545	1
					Gm3355	0.512326	0.0444186	1
					Fcrla	-1.28498	0.044592	1
					Rnps1	-2.39788	0.0446123	1
					Psma6	-0.521452	0.0446144	1
					Ldb3	-2.62027	0.044621	1
					Atrn	-2.71981	0.0446254	1
					Eef2	0.452058	0.0446352	1
					2810032G03Rik	0.897579	0.0446734	1
					Cisd2	1.50901	0.0447705	1
					Timp1	1.50901	0.0447705	1
					Plagl2	1.46719	0.0447786	1
					Abcg2	0.815117	0.0448967	1
					Pfdn6	0.615929	0.0451041	1
					Cyp51	-2.27235	0.0451647	1
					Ube2d3	-1.49741	0.0452248	1
					Mettl9	1.28662	0.0452454	1
					Smarca4	-0.640275	0.0453251	1
					Atp6v0c	0.627658	0.0453654	1
					Bmpr1a	-1.77639	0.0453907	1
					Cfap36	1.30256	0.0456918	1
					Mrps18a	0.856937	0.0457241	1
					Rnf219	0.819354	0.0457284	1
					Thap3	-2.06084	0.0457292	1
					Vdac1	0.7176	0.0459503	1
					Arvcf	-1.64942	0.0462153	1
					Capzb	0.560544	0.0462737	1
					Ift74	-1.59052	0.0462796	1
					Gm5445	0.878963	0.0465663	1
					Rab34	1.70166	0.0467151	1
					Adam7	-2.06084	0.0467274	1
					Pnn	-2.22795	0.0468947	1
					Catsperd	-0.377927	0.0469848	1
					Agrp	1.18709	0.0471006	1
					Wdr27	1.08017	0.047109	1
					Fars2	0.620045	0.0471418	1
					Ino80dos	-1.90038	0.0472107	1
					Anxa1	0.46272	0.0472596	1
					4930578M01Rik	-1.66439	0.0473352	1
					Lrrc38	-2.03531	0.0474085	1
					Dnajc22	-2.03531	0.0474618	1
					Fmnl2	-2.03531	0.04748	1
					Mrps31	-2.39788	0.0474816	1
					Gm15772	0.215899	0.0475004	1
					Park7	-1.09302	0.0476341	1
					Rpl34-ps2	-1.75151	0.047915	1
					Gm16332	0.772048	0.0479381	1
					Nasp	-1.54988	0.0480599	1
					Oaz1-ps	-0.471878	0.0480746	1
					Kirrel3	-1.8833	0.0481799	1
					Adss	0.672512	0.0482273	1
					Gm14586	-0.328529	0.0482516	1
					Atxn2	-1.61042	0.0483795	1
					Uchl3	-1.21501	0.0484828	1
					Mcf2	1.18709	0.0485843	1
					Shisa4	0.887525	0.0486002	1
					Npepps	-0.852443	0.0487344	1
					Rps16	-0.433678	0.0488439	1
					Imp3	1.64652	0.0489317	1
					Cep192	-1.09832	0.0489747	1
					Pcolce	0.476592	0.0489853	1
					Prr14l	-1.17047	0.0489893	1
					Srp9	0.95262	0.0492188	1
					Serpinb6a	0.532221	0.0494235	1
					Gabpb2	-1.46061	0.0497198	1
					Gm12718	-2.03531	0.0498283	1
					Iars2	-1.57845	0.0498531	1
					Map3k7	-1.75151	0.0498687	1
					Gm9349	0.839162	0.0500757	1
					Ncam2	1.08017	0.0500937	1
					Gstm2	0.99444	0.0501196	1
					Sidt1	-1.07165	0.050185	1
					Serinc1	1.50901	0.0504022	1
					Gm4342	0.299762	0.0505143	1
					Steap2	0.99444	0.0506196	1
					Tlk1	-0.203014	0.0507363	1
					Akap10	-1.49099	0.0509457	1
					Gm9712	0.411959	0.0510364	1
					Sox30	0.272986	0.0514769	1
					Eif3h	0.39859	0.0515181	1
					P4ha1	0.833449	0.0515444	1
					Ppp2r1a	0.887525	0.0516521	1
					Gm12508	2.06155	0.0517584	1
					Ndufa4	0.412462	0.0517767	1
					Col12a1	2.62004	0.0518001	1
					Myl12a	0.290708	0.0519003	1
					Calm3	0.846049	0.0522187	1
					Gm4045	0.362528	0.0523067	1
					Sfpq	2.09398	0.0523915	1
					Gm21119	2.27455	0.052393	1
					Pdzrn4	2.27455	0.052393	1
					Septin7	0.644293	0.0524291	1
					Prkdc	-1.2173	0.0526891	1
					Gm2991	1.92405	0.0529347	1
					AI837181	1.99444	0.0529828	1
					Gm10157	-0.69262	0.0530863	1
					Naca	-0.312649	0.0531678	1
					Acox1	1.18709	0.0533142	1
					Zfhx3	-1.19143	0.0533367	1
					Chchd1	-1.66091	0.053388	1
					Tnrc6c	-1.95976	0.0534378	1
					Cflar	1.88753	0.053571	1
					Ephb2	0.646517	0.0537327	1
					Tnpo1	0.388719	0.0538035	1
					Snapc5	1.77205	0.0538207	1
					Chmp5	0.980635	0.0538776	1
					Tpst2	1.92405	0.0541203	1
					Calm1	0.264162	0.0541897	1
					Tmem60	1.88753	0.0542149	1
					Vti1b	1.27455	0.0543124	1
					Ddx39b	1.42809	0.0543479	1
					Anapc16	0.903293	0.0543874	1
					Tmem151a	1.10462	0.0548217	1
					Gm15428	-1.49099	0.054969	1
					Cct6a	0.519661	0.0552605	1
					Gm43158	-1.81291	0.0553488	1
					Met	1.77205	0.0554587	1
					Gm10269	0.257827	0.0554903	1
					Zbed4	-2.43741	0.0555718	1
					Camk2d	0.457733	0.0556464	1
					4930402H24Rik	-1.17548	0.0556981	1
					Slc35b1	1.27455	0.0557861	1
					Trerf1	-2.25349	0.0560427	1
					Cntnap5a	1.64652	0.0560835	1
					Gm11964	1.64652	0.0560835	1
					Magohb	1.64652	0.0560835	1
					Copg1	1.67251	0.0561062	1
					Zeb1	1.08017	0.0561683	1
					Gm5835	1.04507	0.0563709	1
					Snrpg	-0.840395	0.0564751	1
					Echs1	1.67251	0.0567142	1
					Rps28	-0.223827	0.056881	1
					Cacna1h	1.50901	0.0573554	1
					Mbd3	1.50901	0.0573554	1
					Ntan1	1.50901	0.0573554	1
					Mga	1.09398	0.0573735	1
					Pde8b	1.05757	0.0574167	1
					Acadm	1.18709	0.0574226	1
					Supt4b	0.839162	0.0575516	1
					Dnlz	0.602123	0.0576064	1
					Ubald1	-2.33648	0.0577525	1
					Fam169a	-0.254273	0.0577528	1
					Pdgfa	1.5656	0.0579795	1
					Traf4	1.32459	0.0580303	1
					Agbl3	-0.397877	0.0580349	1
					Amd1	2.25747	0.0580457	1
					D8Ertd738e	-0.490986	0.0580582	1
					Nlrp12	-1.81291	0.0582393	1
					Cenpf	-1.07595	0.0585391	1
					Gm45861	0.535009	0.0585405	1
					1700025G04Rik	1.35701	0.0586373	1
					Hnrnph1	1.35701	0.0586373	1
					Gm5776	0.409478	0.0588169	1
					Aimp1	0.570414	0.0588492	1
					Fgfr1op2	0.672512	0.0589604	1
					Rpl15-ps3	-0.612002	0.0589894	1
					Clk1	1.11308	0.0590479	1
					Casc4	1.11308	0.0590604	1
					Map7d2	-1.63889	0.0591703	1
					Dph6	1.45012	0.0593294	1
					Ift27	1.45012	0.0593294	1
					Sh3gl1	1.45012	0.0593294	1
					Slx4ip	1.45012	0.0593294	1
					Hnrnpk	0.641651	0.0593448	1
					Abhd17a	1.5656	0.0593591	1
					Cenpx	1.45012	0.0593591	1
					Fnbp1l	1.45012	0.0593591	1
					Vps13b	1.65657	0.0593679	1
					Atp5pb	-1.19434	0.0594247	1
					Tsga10ip	-2.51335	0.0594533	1
					Sap130	-2.45677	0.0594611	1
					Inhba	0.435013	0.0595205	1
					Gm10123	-0.267123	0.0596182	1
					Cfap77	-0.344039	0.0597648	1
					Wdr18	0.535009	0.0600758	1
					Abcf1	0.576128	0.0600882	1
					Phb	0.978499	0.0603522	1
					9130401M01Rik	1.32459	0.0606907	1
					Dusp11	1.32459	0.0606907	1
					Tgm2	1.32459	0.0606907	1
					Celf2	-1.10837	0.0608572	1
					Mtor	-1.23741	0.0609873	1
					Gm17786	-0.295563	0.061115	1
					Desi1	-2.20523	0.0611576	1
					Gm33312	0.95262	0.0612241	1
					Gm9843	-0.263504	0.061378	1
					Tmem167	0.301042	0.0614313	1
					Rps11-ps1	-0.341908	0.0614425	1
					Gm15946	-1.39788	0.0617805	1
					Gm11290	-2.20523	0.0618627	1
					Mfap1a	0.772048	0.0619001	1
					Fbrs	1.18709	0.0620536	1
					Foxm1	1.18709	0.0620633	1
					Pkn3	1.18709	0.0620633	1
					Rpl17-ps5	-0.590522	0.0622004	1
					Zbtb43	0.627658	0.0623305	1
					Limk1	-1.81291	0.0623403	1
					Mid1ip1	1.06155	0.0627752	1
					Pkn2	0.583014	0.0627872	1
					9130024F11Rik	0.114743	0.062904	1
					Son	0.453366	0.063009	1
					Atl1	0.509014	0.0630113	1
					Nr2f2	1.03508	0.0634468	1
					Rasl11a	1.03508	0.0634468	1
					Tpgs1	0.924051	0.0634711	1
					Bc1	1.23241	0.0635182	1
					Dnm1l	0.865157	0.0635861	1
					Fbxw8	-0.776389	0.0636205	1
					Gm11449	0.46272	0.0636495	1
					Tcf12	1.44084	0.0636524	1
					Gm12537	0.865157	0.0636763	1
					Rps24-ps2	-0.695557	0.0639094	1
					Rab27a	-0.538739	0.0639489	1
					2310033P09Rik	2.64652	0.0639497	1
					Timm13	0.467193	0.0640332	1
					Ccnb1	-1.8833	0.0640828	1
					Pou2f2	-1.98284	0.0641131	1
					Cltc	1.10462	0.0643973	1
					Pa2g4	1.18709	0.0646224	1
					Hesx1	-1.08593	0.0646662	1
					Polg	2.64652	0.0648508	1
					Ppm1l	2.88753	0.064858	1
					Ncl	0.36186	0.0650601	1
					Cox14	-0.473757	0.0652051	1
					Kank1	-1.8833	0.0653205	1
					Gm17494	-1.98284	0.0653393	1
					Speg	-0.873456	0.0654604	1
					Gm12618	0.772048	0.0655767	1
					Ccdc47	0.772048	0.0656856	1
					Abcb4	2.35701	0.0657182	1
					Ccn2	2.35701	0.0657182	1
					Cnot9	2.35701	0.0657182	1
					Hmgcl	2.35701	0.0657182	1
					Tmem237	2.35701	0.0657182	1
					Arhgap1	2.50901	0.0657255	1
					Mrpl4	2.50901	0.0657255	1
					Peak1	0.762588	0.0657282	1
					Cldnd1	-1.81291	0.0659187	1
					Mrps36-ps1	-1.64942	0.0659305	1
					Gm8229	-0.917884	0.0659951	1
					Cpq	0.362813	0.0661028	1
					Aamdc	-1.81291	0.0665514	1
					1110059G10Rik	2.18709	0.0665953	1
					Bag6	2.18709	0.0665953	1
					Evi5	2.18709	0.0665953	1
					Hnf1a	2.18709	0.0665953	1
					Muc5ac	2.18709	0.0665953	1
					Scaf1	2.18709	0.0665953	1
					Zfp993	2.18709	0.0665953	1
					Gcnt1	0.964693	0.0666878	1
					Wdr1	1.11308	0.066846	1
					Kitl	1.11997	0.0668559	1
					Sfxn1	0.833449	0.0669039	1
					Cnih4	-0.846337	0.0670069	1
					Eya4	0.538558	0.067018	1
					Gm15446	1.99444	0.0674672	1
					Asxl1	-1.81291	0.0681674	1
					Kidins220	-2.54988	0.0682032	1
					Atf7ip	2.06155	0.0684133	1
					Cyfip1	1.18709	0.0684422	1
					Ak9	1.03508	0.0685526	1
					Mrps36	-1.01727	0.0687376	1
					Arpc4	0.865157	0.0690272	1
					Rps19	-0.190191	0.0690425	1
					Pigyl	0.540723	0.0691176	1
					Ecm1	1.03508	0.0691193	1
					Parp16	-1.03531	0.0692446	1
					Ago3	-1.73045	0.0692751	1
					Cdc27	1.92405	0.0692847	1
					Poglut3	1.92405	0.0692847	1
					Qsox1	1.92405	0.0692847	1
					Suz12	-1.15395	0.0693211	1
					Rec114	2.30256	0.0693223	1
					Mfsd5	0.476592	0.0693312	1
					Zfp462	-0.529667	0.0694534	1
					Mvb12a	-2.22795	0.0695868	1
					Dnajc9	-2.31541	0.0696195	1
					Psmb3	-0.428092	0.0696941	1
					Dnaja1	0.538558	0.0700182	1
					Abcb7	0.727654	0.0700879	1
					Rnh1	0.696099	0.0702142	1
					Armc1	1.77205	0.0702312	1
					Gm14325	1.77205	0.0702312	1
					Gm38825	1.77205	0.0702312	1
					Gm47687	1.77205	0.0702312	1
					Mybbp1a	1.77205	0.0702312	1
					Gm30938	1.77205	0.0702464	1
					Zdhhc12	1.77205	0.0702464	1
					Pcbd2	-1.18065	0.0702727	1
					Washc4	1.06155	0.0703481	1
					Dnmt3a	-1.54988	0.0703541	1
					Arhgdib	0.476592	0.0704029	1
					Ehd1	0.824515	0.0707257	1
					Sod1	0.772048	0.0708434	1
					2610037D02Rik	-1.81291	0.0709698	1
					Rpl29-ps2	0.524121	0.0710606	1
					Rpgrip1l	-2.13484	0.0710726	1
					H1f3	-2.31541	0.0710962	1
					Art3	-2.39788	0.071115	1
					Rbm20	0.746513	0.0711328	1
					Mtln	1.77205	0.0711677	1
					Ppp2r2d	1.60212	0.0711677	1
					Atf5	1.60212	0.0711728	1
					Dctn1	1.60212	0.0711728	1
					Fpr3	1.60212	0.0711728	1
					Fut8	1.60212	0.0711728	1
					Pmpcb	1.60212	0.0711728	1
					Tbx3os1	1.60212	0.0711728	1
					Vmn2r96	1.60212	0.0711728	1
					Rpsa-ps5	1.5656	0.0712161	1
					Atad2b	-1.49099	0.0714001	1
					Rps18-ps5	0.256577	0.0714125	1
					Fkbp15	1.24412	0.0715032	1
					Gm8832	0.661017	0.0715327	1
					Stk38	1.18709	0.0715452	1
					9330179D12Rik	0.646517	0.0715948	1
					Zmat2	1.12569	0.0720158	1
					Sdhc	0.409478	0.0720179	1
					Gm50461	1.03508	0.0720986	1
					Borcs8	1.40948	0.0721093	1
					Gm17241	1.40948	0.0721093	1
					Psmf1	1.40948	0.0721093	1
[truncated: 5,167 more rows]
