# Supplementary material
Source: Royal Society of Chemistry journal article supplement (doi:10.1039/d5lc01008j)
Supplement: d5lc01008j5.xlsx [file d5lc01008j5.xlsx]

## Sheet: Supplementary file 1
Labelling annotation of C10 and SVEC cells processed using nanoSPINS workflow
sample	Annotation	Cell type	Type	Array	Row	Column	TMT channel
SB22_12_PNNL_21	C10_A1_3	C10	nanoPOTS	1	1	1	133C
SB22_12_PNNL_21	SVEC_A1_4	SVEC	nanoPOTS	1	1	2	133N
SB22_12_PNNL_21	C10_A1_4	C10	nanoPOTS	1	1	3	134N
SB22_12_PNNL_21	SVEC_A1_2	SVEC	nanoPOTS	1	2	1	131N
SB22_12_PNNL_21	SVEC_A1_3	SVEC	nanoPOTS	1	2	3	132C
SB22_12_PNNL_21	C10_A1_1	C10	nanoPOTS	1	3	1	130N
SB22_12_PNNL_21	SVEC_A1_1	SVEC	nanoPOTS	1	3	2	130C
SB22_12_PNNL_21	C10_A1_2	C10	nanoPOTS	1	3	3	131C
SB22_12_PNNL_21	C10_A2_1	C10	nanoPOTS	1	3	6	130N
SB22_12_PNNL_21	C10_A2_2	C10	nanoPOTS	1	3	8	131C
SB22_12_PNNL_21	C10_A2_3	C10	nanoPOTS	1	1	6	133C
SB22_12_PNNL_21	C10_A2_4	C10	nanoPOTS	1	1	8	134N
SB22_12_PNNL_21	C10_A3_1	C10	nanoPOTS	2	3	1	130N
SB22_12_PNNL_21	C10_A3_2	C10	nanoPOTS	2	3	3	131C
SB22_12_PNNL_21	C10_A3_3	C10	nanoPOTS	2	1	1	133C
SB22_12_PNNL_21	C10_A3_4	C10	nanoPOTS	2	1	3	134N
SB22_12_PNNL_21	C10_A4_1	C10	nanoPOTS	2	3	6	130N
SB22_12_PNNL_21	C10_A4_2	C10	nanoPOTS	2	3	8	131C
SB22_12_PNNL_21	C10_A4_3	C10	nanoPOTS	2	1	6	133C
SB22_12_PNNL_21	C10_A4_4	C10	nanoPOTS	2	1	8	134N
SB22_12_PNNL_21	C10_A5_1	C10	nanoPOTS	3	3	1	130N
SB22_12_PNNL_21	C10_A5_2	C10	nanoPOTS	3	3	3	131C
SB22_12_PNNL_21	C10_A5_3	C10	nanoPOTS	3	1	1	133C
SB22_12_PNNL_21	C10_A5_4	C10	nanoPOTS	3	1	3	134N
SB22_12_PNNL_21	C10_A6_1	C10	nanoPOTS	3	3	6	130N
SB22_12_PNNL_21	C10_A6_2	C10	nanoPOTS	3	3	8	131C
SB22_12_PNNL_21	C10_A6_3	C10	nanoPOTS	3	1	6	133C
SB22_12_PNNL_21	C10_A6_4	C10	nanoPOTS	3	1	8	134N
SB22_12_PNNL_21	C10_A7_1	C10	nanoPOTS	4	3	1	130N
SB22_12_PNNL_21	C10_A7_2	C10	nanoPOTS	4	3	3	131C
SB22_12_PNNL_21	C10_A7_3	C10	nanoPOTS	4	1	1	133C
SB22_12_PNNL_21	C10_A7_4	C10	nanoPOTS	4	1	3	134N
SB22_12_PNNL_21	C10_A8_1	C10	nanoPOTS	4	3	6	130N
SB22_12_PNNL_21	C10_A8_2	C10	nanoPOTS	4	3	8	131C
SB22_12_PNNL_21	C10_A8_3	C10	nanoPOTS	4	1	6	133C
SB22_12_PNNL_21	C10_A8_4	C10	nanoPOTS	4	1	8	134N
SB22_12_PNNL_21	C10_B1_1	C10	nanoPOTS	1	7	1	130N
SB22_12_PNNL_21	C10_B1_2	C10	nanoPOTS	1	7	3	131C
SB22_12_PNNL_21	C10_B1_3	C10	nanoPOTS	1	5	1	133C
SB22_12_PNNL_21	C10_B1_4	C10	nanoPOTS	1	5	3	134N
SB22_12_PNNL_21	C10_B2_1	C10	nanoPOTS	1	7	6	130N
SB22_12_PNNL_21	C10_B2_2	C10	nanoPOTS	1	7	8	131C
SB22_12_PNNL_21	C10_B2_3	C10	nanoPOTS	1	5	6	133C
SB22_12_PNNL_21	C10_B2_4	C10	nanoPOTS	1	5	8	134N
SB22_12_PNNL_21	C10_B3_1	C10	nanoPOTS	2	7	1	130N
SB22_12_PNNL_21	C10_B3_2	C10	nanoPOTS	2	7	3	131C
SB22_12_PNNL_21	C10_B3_3	C10	nanoPOTS	2	5	1	133C
SB22_12_PNNL_21	C10_B3_4	C10	nanoPOTS	2	5	3	134N
SB22_12_PNNL_21	C10_B4_1	C10	nanoPOTS	2	7	6	130N
SB22_12_PNNL_21	C10_B4_2	C10	nanoPOTS	2	7	8	131C
SB22_12_PNNL_21	C10_B4_3	C10	nanoPOTS	2	5	6	133C
SB22_12_PNNL_21	C10_B4_4	C10	nanoPOTS	2	5	8	134N
SB22_12_PNNL_21	C10_B5_1	C10	nanoPOTS	3	7	1	130N
SB22_12_PNNL_21	C10_B5_2	C10	nanoPOTS	3	7	3	131C
SB22_12_PNNL_21	C10_B5_3	C10	nanoPOTS	3	5	1	133C
SB22_12_PNNL_21	C10_B5_4	C10	nanoPOTS	3	5	3	134N
SB22_12_PNNL_21	C10_B6_1	C10	nanoPOTS	3	7	6	130N
SB22_12_PNNL_21	C10_B6_2	C10	nanoPOTS	3	7	8	131C
SB22_12_PNNL_21	C10_B6_3	C10	nanoPOTS	3	5	6	133C
SB22_12_PNNL_21	C10_B6_4	C10	nanoPOTS	3	5	8	134N
SB22_12_PNNL_21	C10_B7_1	C10	nanoPOTS	4	7	1	130N
SB22_12_PNNL_21	C10_B7_2	C10	nanoPOTS	4	7	3	131C
SB22_12_PNNL_21	C10_B7_3	C10	nanoPOTS	4	5	1	133C
SB22_12_PNNL_21	C10_B7_4	C10	nanoPOTS	4	5	3	134N
SB22_12_PNNL_21	C10_B8_1	C10	nanoPOTS	4	7	6	130N
SB22_12_PNNL_21	C10_B8_2	C10	nanoPOTS	4	7	8	131C
SB22_12_PNNL_21	C10_B8_3	C10	nanoPOTS	4	5	6	133C
SB22_12_PNNL_21	C10_B8_4	C10	nanoPOTS	4	5	8	134N
SB22_12_PNNL_21	C10_C1_1	C10	nanoPOTS	1	11	1	130N
SB22_12_PNNL_21	C10_C1_2	C10	nanoPOTS	1	11	3	131C
SB22_12_PNNL_21	C10_C1_3	C10	nanoPOTS	1	9	1	133C
SB22_12_PNNL_21	C10_C1_4	C10	nanoPOTS	1	9	3	134N
SB22_12_PNNL_21	C10_C2_1	C10	nanoPOTS	1	11	6	130N
SB22_12_PNNL_21	C10_C2_2	C10	nanoPOTS	1	11	8	131C
SB22_12_PNNL_21	C10_C2_3	C10	nanoPOTS	1	9	6	133C
SB22_12_PNNL_21	C10_C2_4	C10	nanoPOTS	1	9	8	134N
SB22_12_PNNL_21	C10_C3_1	C10	nanoPOTS	2	11	1	130N
SB22_12_PNNL_21	C10_C3_2	C10	nanoPOTS	2	11	3	131C
SB22_12_PNNL_21	C10_C3_3	C10	nanoPOTS	2	9	1	133C
SB22_12_PNNL_21	C10_C3_4	C10	nanoPOTS	2	9	3	134N
SB22_12_PNNL_21	C10_C4_1	C10	nanoPOTS	2	11	6	130N
SB22_12_PNNL_21	C10_C4_2	C10	nanoPOTS	2	11	8	131C
SB22_12_PNNL_21	C10_C4_3	C10	nanoPOTS	2	9	6	133C
SB22_12_PNNL_21	C10_C4_4	C10	nanoPOTS	2	9	8	134N
SB22_12_PNNL_21	C10_C5_1	C10	nanoPOTS	3	11	1	130N
SB22_12_PNNL_21	C10_C5_2	C10	nanoPOTS	3	11	3	131C
SB22_12_PNNL_21	C10_C5_3	C10	nanoPOTS	3	9	1	133C
SB22_12_PNNL_21	C10_C5_4	C10	nanoPOTS	3	9	3	134N
SB22_12_PNNL_21	C10_C6_1	C10	nanoPOTS	3	11	6	130N
SB22_12_PNNL_21	C10_C6_2	C10	nanoPOTS	3	11	8	131C
SB22_12_PNNL_21	C10_C6_3	C10	nanoPOTS	3	9	6	133C
SB22_12_PNNL_21	C10_C6_4	C10	nanoPOTS	3	9	8	134N
SB22_12_PNNL_21	C10_C7_1	C10	nanoPOTS	4	11	1	130N
SB22_12_PNNL_21	C10_C7_2	C10	nanoPOTS	4	11	3	131C
SB22_12_PNNL_21	C10_C7_3	C10	nanoPOTS	4	9	1	133C
SB22_12_PNNL_21	C10_C7_4	C10	nanoPOTS	4	9	3	134N
SB22_12_PNNL_21	C10_C8_1	C10	nanoPOTS	4	11	6	130N
SB22_12_PNNL_21	C10_C8_2	C10	nanoPOTS	4	11	8	131C
SB22_12_PNNL_21	C10_C8_3	C10	nanoPOTS	4	9	6	133C
SB22_12_PNNL_21	C10_C8_4	C10	nanoPOTS	4	9	8	134N
SB22_12_PNNL_21	SVEC_A2_1	SVEC	nanoPOTS	1	3	7	130C
SB22_12_PNNL_21	SVEC_A2_2	SVEC	nanoPOTS	1	2	6	131N
SB22_12_PNNL_21	SVEC_A2_3	SVEC	nanoPOTS	1	2	8	132C
SB22_12_PNNL_21	SVEC_A2_4	SVEC	nanoPOTS	1	1	7	133N
SB22_12_PNNL_21	SVEC_A3_1	SVEC	nanoPOTS	2	3	2	130C
SB22_12_PNNL_21	SVEC_A3_2	SVEC	nanoPOTS	2	2	1	131N
SB22_12_PNNL_21	SVEC_A3_3	SVEC	nanoPOTS	2	2	3	132C
SB22_12_PNNL_21	SVEC_A3_4	SVEC	nanoPOTS	2	1	2	133N
SB22_12_PNNL_21	SVEC_A4_1	SVEC	nanoPOTS	2	3	7	130C
SB22_12_PNNL_21	SVEC_A4_2	SVEC	nanoPOTS	2	2	6	131N
SB22_12_PNNL_21	SVEC_A4_3	SVEC	nanoPOTS	2	2	8	132C
SB22_12_PNNL_21	SVEC_A4_4	SVEC	nanoPOTS	2	1	7	133N
SB22_12_PNNL_21	SVEC_A5_1	SVEC	nanoPOTS	3	3	2	130C
SB22_12_PNNL_21	SVEC_A5_2	SVEC	nanoPOTS	3	2	1	131N
SB22_12_PNNL_21	SVEC_A5_3	SVEC	nanoPOTS	3	2	3	132C
SB22_12_PNNL_21	SVEC_A5_4	SVEC	nanoPOTS	3	1	2	133N
SB22_12_PNNL_21	SVEC_A6_1	SVEC	nanoPOTS	3	3	7	130C
SB22_12_PNNL_21	SVEC_A6_2	SVEC	nanoPOTS	3	2	6	131N
SB22_12_PNNL_21	SVEC_A6_3	SVEC	nanoPOTS	3	2	8	132C
SB22_12_PNNL_21	SVEC_A6_4	SVEC	nanoPOTS	3	1	7	133N
SB22_12_PNNL_21	SVEC_A7_1	SVEC	nanoPOTS	4	3	2	130C
SB22_12_PNNL_21	SVEC_A7_2	SVEC	nanoPOTS	4	2	1	131N
SB22_12_PNNL_21	SVEC_A7_3	SVEC	nanoPOTS	4	2	3	132C
SB22_12_PNNL_21	SVEC_A7_4	SVEC	nanoPOTS	4	1	2	133N
SB22_12_PNNL_21	SVEC_A8_1	SVEC	nanoPOTS	4	3	7	130C
SB22_12_PNNL_21	SVEC_A8_2	SVEC	nanoPOTS	4	2	6	131N
SB22_12_PNNL_21	SVEC_A8_3	SVEC	nanoPOTS	4	2	8	132C
SB22_12_PNNL_21	SVEC_A8_4	SVEC	nanoPOTS	4	1	7	133N
SB22_12_PNNL_21	SVEC_B1_1	SVEC	nanoPOTS	1	7	2	130C
SB22_12_PNNL_21	SVEC_B1_2	SVEC	nanoPOTS	1	6	1	131N
SB22_12_PNNL_21	SVEC_B1_3	SVEC	nanoPOTS	1	6	3	132C
SB22_12_PNNL_21	SVEC_B1_4	SVEC	nanoPOTS	1	5	2	133N
SB22_12_PNNL_21	SVEC_B2_1	SVEC	nanoPOTS	1	7	7	130C
SB22_12_PNNL_21	SVEC_B2_2	SVEC	nanoPOTS	1	6	6	131N
SB22_12_PNNL_21	SVEC_B2_3	SVEC	nanoPOTS	1	6	8	132C
SB22_12_PNNL_21	SVEC_B2_4	SVEC	nanoPOTS	1	5	7	133N
SB22_12_PNNL_21	SVEC_B3_1	SVEC	nanoPOTS	2	7	2	130C
SB22_12_PNNL_21	SVEC_B3_2	SVEC	nanoPOTS	2	6	1	131N
SB22_12_PNNL_21	SVEC_B3_3	SVEC	nanoPOTS	2	6	3	132C
SB22_12_PNNL_21	SVEC_B3_4	SVEC	nanoPOTS	2	5	2	133N
SB22_12_PNNL_21	SVEC_B4_1	SVEC	nanoPOTS	2	7	7	130C
SB22_12_PNNL_21	SVEC_B4_2	SVEC	nanoPOTS	2	6	6	131N
SB22_12_PNNL_21	SVEC_B4_3	SVEC	nanoPOTS	2	6	8	132C
SB22_12_PNNL_21	SVEC_B4_4	SVEC	nanoPOTS	2	5	7	133N
SB22_12_PNNL_21	SVEC_B5_1	SVEC	nanoPOTS	3	7	2	130C
SB22_12_PNNL_21	SVEC_B5_2	SVEC	nanoPOTS	3	6	1	131N
SB22_12_PNNL_21	SVEC_B5_3	SVEC	nanoPOTS	3	6	3	132C
SB22_12_PNNL_21	SVEC_B5_4	SVEC	nanoPOTS	3	5	2	133N
SB22_12_PNNL_21	SVEC_B6_1	SVEC	nanoPOTS	3	7	7	130C
SB22_12_PNNL_21	SVEC_B6_2	SVEC	nanoPOTS	3	6	6	131N
SB22_12_PNNL_21	SVEC_B6_3	SVEC	nanoPOTS	3	6	8	132C
SB22_12_PNNL_21	SVEC_B6_4	SVEC	nanoPOTS	3	5	7	133N
SB22_12_PNNL_21	SVEC_B7_1	SVEC	nanoPOTS	4	7	2	130C
SB22_12_PNNL_21	SVEC_B7_2	SVEC	nanoPOTS	4	6	1	131N
SB22_12_PNNL_21	SVEC_B7_3	SVEC	nanoPOTS	4	6	3	132C
SB22_12_PNNL_21	SVEC_B7_4	SVEC	nanoPOTS	4	5	2	133N
SB22_12_PNNL_21	SVEC_B8_1	SVEC	nanoPOTS	4	7	7	130C
SB22_12_PNNL_21	SVEC_B8_2	SVEC	nanoPOTS	4	6	6	131N
SB22_12_PNNL_21	SVEC_B8_3	SVEC	nanoPOTS	4	6	8	132C
SB22_12_PNNL_21	SVEC_B8_4	SVEC	nanoPOTS	4	5	7	133N
SB22_12_PNNL_21	SVEC_C1_1	SVEC	nanoPOTS	1	11	2	130C
SB22_12_PNNL_21	SVEC_C1_2	SVEC	nanoPOTS	1	10	1	131N
SB22_12_PNNL_21	SVEC_C1_3	SVEC	nanoPOTS	1	10	3	132C
SB22_12_PNNL_21	SVEC_C1_4	SVEC	nanoPOTS	1	9	2	133N
SB22_12_PNNL_21	SVEC_C2_1	SVEC	nanoPOTS	1	11	7	130C
SB22_12_PNNL_21	SVEC_C2_2	SVEC	nanoPOTS	1	10	6	131N
SB22_12_PNNL_21	SVEC_C2_3	SVEC	nanoPOTS	1	10	8	132C
SB22_12_PNNL_21	SVEC_C2_4	SVEC	nanoPOTS	1	9	7	133N
SB22_12_PNNL_21	SVEC_C3_1	SVEC	nanoPOTS	2	11	2	130C
SB22_12_PNNL_21	SVEC_C3_2	SVEC	nanoPOTS	2	10	1	131N
SB22_12_PNNL_21	SVEC_C3_3	SVEC	nanoPOTS	2	10	3	132C
SB22_12_PNNL_21	SVEC_C3_4	SVEC	nanoPOTS	2	9	2	133N
SB22_12_PNNL_21	SVEC_C4_1	SVEC	nanoPOTS	2	11	7	130C
SB22_12_PNNL_21	SVEC_C4_2	SVEC	nanoPOTS	2	10	6	131N
SB22_12_PNNL_21	SVEC_C4_3	SVEC	nanoPOTS	2	10	8	132C
SB22_12_PNNL_21	SVEC_C4_4	SVEC	nanoPOTS	2	9	7	133N
SB22_12_PNNL_21	SVEC_C5_1	SVEC	nanoPOTS	3	11	2	130C
SB22_12_PNNL_21	SVEC_C5_2	SVEC	nanoPOTS	3	10	1	131N
SB22_12_PNNL_21	SVEC_C5_3	SVEC	nanoPOTS	3	10	3	132C
SB22_12_PNNL_21	SVEC_C5_4	SVEC	nanoPOTS	3	9	2	133N
SB22_12_PNNL_21	SVEC_C6_1	SVEC	nanoPOTS	3	11	7	130C
SB22_12_PNNL_21	SVEC_C6_2	SVEC	nanoPOTS	3	10	6	131N
SB22_12_PNNL_21	SVEC_C6_3	SVEC	nanoPOTS	3	10	8	132C
SB22_12_PNNL_21	SVEC_C6_4	SVEC	nanoPOTS	3	9	7	133N
SB22_12_PNNL_21	SVEC_C7_1	SVEC	nanoPOTS	4	11	2	130C
SB22_12_PNNL_21	SVEC_C7_2	SVEC	nanoPOTS	4	10	1	131N
SB22_12_PNNL_21	SVEC_C7_3	SVEC	nanoPOTS	4	10	3	132C
SB22_12_PNNL_21	SVEC_C7_4	SVEC	nanoPOTS	4	9	2	133N
SB22_12_PNNL_21	SVEC_C8_1	SVEC	nanoPOTS	4	11	7	130C
SB22_12_PNNL_21	SVEC_C8_2	SVEC	nanoPOTS	4	10	6	131N
SB22_12_PNNL_21	SVEC_C8_3	SVEC	nanoPOTS	4	10	8	132C
SB22_12_PNNL_21	SVEC_C8_4	SVEC	nanoPOTS	4	9	7	133N
